# Supplementary material for: Identification of Salt-Responsive Genes in Melatonin Regulated Alfalfa Salt Tolerance by Transcriptome Analysis
Source: Preprints.org preprint supplement (doi:10.20944/preprints202403.1815.v2), 2024-04-17
Supplement: Supplementary file 1 [file supplementary]

Archive with 11 entries (11 files):
- Supplementary Files/Supplementary figures.pdf
- Supplementary Files/Table S1.docx
- Supplementary Files/Table S10.xlsx
- Supplementary Files/Table S2.xlsx
- Supplementary Files/Table S3.xlsx
- Supplementary Files/Table S4.xlsx
- Supplementary Files/Table S5.xlsx
- Supplementary Files/Table S6.xlsx
- Supplementary Files/Table S7.xlsx
- Supplementary Files/Table S8.xlsx
- Supplementary Files/Table S9.xlsx
