# Supplementary material for: Identification of Salt-Responsive Genes in Melatonin Regulated Alfalfa Salt Tolerance by Transcriptome Analysis
Source: Preprints.org preprint supplement (doi:10.20944/preprints202403.1815.v2), 2024-04-17
Supplement: Supplementary file 1 [file supplementary › Supplementary Files/Table S1.docx]

| **Supplemental Table S1** The primer sequences used in the qRT-PCR analyses | | | |
| --- | --- | --- | --- |
| **No.** | **Gene** | **Forward primer (5'-3')** | **Reverse primer (5'-3')** |
| 1 | *MsG0780040428.01* | CCGGTAAAATGGCCGAAAGC | GAGCGGGGTTAGAGTGGATG |
| 2 | *MsG0780036812.01* | TGCCATCATCGGTAACAACCA | TGGGACGTGCGAAAAGAGTT |
| 3 | *MsG0180004772.01* | CAGCACCACCGTTGAATTGG | GGGCCCATGTAAAGGGCTTA |
| 4 | *MsG0180004541.01* | CCGCTGAGGTTCTTCCTGTT | ACCAACCAATCGACGACACA |
| 5 | *MsG0880047697.01* | TTCTTTTTGCGCCACCTTCC | TCAGCCAGGTTCTCAAGTTCC |
| 6 | *MsG0480020076.01* | CAAGGTATGGTTTGCACCGC | GAGATCCTCCGATACCCCCA |
| 7 | *MsG0180005358.01* | GAAAGCCACCAGAGAAGTGC | CCCACTCAAGTCCTTCTCCC |
| 8 | *MsG0480018569.01* | AAGAGACAACCGCCTCCATC | TGCCACCAACGAGGTTACAA |
| 9 | *Ms-ACTIN2* | CAAAAGATGGCAGATGCTGAGGAT | CATGACACCAGTATGACGAGGTCG |
