# Supplementary material for: Identification of Salt-Responsive Genes in Melatonin Regulated Alfalfa Salt Tolerance by Transcriptome Analysis
Source: Preprints.org preprint supplement (doi:10.20944/preprints202403.1815.v2), 2024-04-17
Supplement: Supplementary file 1 [file supplementary › Supplementary Files/Table S2.xlsx]

## Sheet: total_diff_stat.deseq2
Supplemental table S2. All differentially expressed genes identified in the transcriptomic data through pairwise comparison.
seq_id	gene_name	description	length	WLN_vs_WLCK_fc(WLN/WLCK)	WLN_vs_WLCK_log2fc(WLN/WLCK)	WLN_vs_WLCK_pvalue	WLN_vs_WLCK_padjust	WLN_vs_WLCK_significant	WLN_vs_WLCK_regulate	WLNMT_vs_WLCK_fc(WLNMT/WLCK)	WLNMT_vs_WLCK_log2fc(WLNMT/WLCK)	WLNMT_vs_WLCK_pvalue	WLNMT_vs_WLCK_padjust	WLNMT_vs_WLCK_significant	WLNMT_vs_WLCK_regulate	WLNMT_vs_WLN_fc(WLNMT/WLN)	WLNMT_vs_WLN_log2fc(WLNMT/WLN)	WLNMT_vs_WLN_pvalue	WLNMT_vs_WLN_padjust	WLNMT_vs_WLN_significant	WLNMT_vs_WLN_regulate	nr	go	KO_id	KO_name	paths	cog	cog_description	pfam	swissprot	entrez
MsG0080047781.01	MsG0080047781.01		534	0.678763	-0.559021	0.890357	1	no	down	0.890474	-0.167354	0.966714	1	no	down	1.29681	0.374965	0.925987	1	no	up	XP_045831062.1(secreted RxLR effector protein 161-like [Trifolium pratense])	GO:0003676(molecular_function:nucleic acid binding)				ENOG410ZS4K(S:Function unknown); COG2801(L:Replication, recombination and repair)	ENOG410ZS4K(-); COG2801(Retrotransposon protein)		sp|P10978|POLX_TOBAC(Retrovirus-related Pol polyprotein from transposon TNT 1-94 OS=Nicotiana tabacum OX=4097 PE=2 SV=1)
MsG0080047782.01	MsG0080047782.01		246	1	0	1	1	no test	no test	1	0	1	1	no test	no test	1	0	1	1	no test	no test	XP_024630538.1(uncharacterized protein LOC112418422 [Medicago truncatula])	GO:0016787(molecular_function:hydrolase activity); GO:0016779(molecular_function:nucleotidyltransferase activity); GO:0004523(molecular_function:RNA-DNA hybrid ribonuclease activity); GO:0015074(biological_process:DNA integration); GO:0004190(molecular_function:aspartic-type endopeptidase activity); GO:0008270(molecular_function:zinc ion binding); GO:0003676(molecular_function:nucleic acid bindin…						PF08284.14(RVP_2:Retroviral aspartyl protease)
MsG0080047783.01	MsG0080047783.01		234	1	0	1	1	no test	no test	1	0	1	1	no test	no test	1	0	1	1	no test	no test	RHN74093.1(putative nucleotidyltransferase, Ribonuclease H [Medicago truncatula])	GO:0016787(molecular_function:hydrolase activity); GO:0016779(molecular_function:nucleotidyltransferase activity); GO:0043531(molecular_function:ADP binding); GO:0004523(molecular_function:RNA-DNA hybrid ribonuclease activity); GO:0015074(biological_process:DNA integration); GO:0008270(molecular_function:zinc ion binding); GO:0003676(molecular_function:nucleic acid binding); GO:0003964(molecular_…
MsG0080047784.01	MsG0080047784.01		534	0.462547	-1.11233	0.781518	1	no	down	0.321113	-1.63885	0.682838	1	no	down	0.689922	-0.535494	0.895591	1	no	down	XP_039682981.1(uncharacterized protein LOC112422824 [Medicago truncatula])	GO:0003676(molecular_function:nucleic acid binding)
MsG0080047785.01	MsG0080047785.01		2271	1.16874	0.224954	0.391742	0.690287	no	up	0.89473	-0.160475	0.573298	0.822196	no	down	0.763008	-0.39023	0.0666567	0.782277	no	down	AES82591.2(transducin/WD40 repeat protein [Medicago truncatula])	GO:0043130(molecular_function:ubiquitin binding); GO:0016579(biological_process:protein deubiquitination); GO:0005515(molecular_function:protein binding); GO:0000724(biological_process:double-strand break repair via homologous recombination)	K15361	WDR48, UAF1		ENOG410XRJ5(S:Function unknown)	ENOG410XRJ5(WD repeat domain 48)	PF11816.11(DUF3337:Domain of unknown function (DUF3337)); PF00400.35(WD40:WD domain, G-beta repeat); PF20426.1(NBCH_WD40:Neurobeachin beta propeller domain)	sp|Q05B17|WDR48_XENTR(WD repeat-containing protein 48 OS=Xenopus tropicalis OX=8364 GN=wdr48 PE=2 SV=1)
MsG0080047786.01	MsG0080047786.01		1427	0.689373	-0.536644	0.464783	0.747558	no	down	0.674688	-0.567707	0.412335	0.7069	no	down	0.975138	-0.0363219	0.957136	0.999405	no	down	XP_003626371.2(acyltransferase-like protein At1g54570, chloroplastic [Medicago truncatula])	GO:1901576(biological_process:organic substance biosynthetic process); GO:0004177(molecular_function:aminopeptidase activity); GO:0004144(molecular_function:diacylglycerol O-acyltransferase activity); GO:0044249(biological_process:cellular biosynthetic process)				ENOG41115HX(S:Function unknown); COG0204(I:Lipid transport and metabolism)	ENOG41115HX(-); COG0204(Acyltransferase)	PF00561.23(Abhydrolase_1:alpha/beta hydrolase fold); PF12146.11(Hydrolase_4:Serine aminopeptidase, S33); PF05728.15(UPF0227:Uncharacterised protein family (UPF0227)); PF12697.10(Abhydrolase_6:Alpha/beta hydrolase family); PF00975.23(Thioesterase:Thioesterase domain)	sp|Q9ZVN2|PES1_ARATH(Phytyl ester synthase 1, chloroplastic OS=Arabidopsis thaliana OX=3702 GN=PES1 PE=1 SV=1)
MsG0080047787.01	MsG0080047787.01		825	1.0851	0.117835	0.855585	0.950521	no	up	1.26749	0.34197	0.578291	0.825094	no	up	1.16471	0.219971	0.703459	0.999405	no	up	XP_003626371.2(acyltransferase-like protein At1g54570, chloroplastic [Medicago truncatula])	GO:1901576(biological_process:organic substance biosynthetic process); GO:0004177(molecular_function:aminopeptidase activity); GO:0016787(molecular_function:hydrolase activity); GO:0016021(cellular_component:integral component of membrane); GO:0005789(cellular_component:endoplasmic reticulum membrane); GO:0044249(biological_process:cellular biosynthetic process); GO:0016747(molecular_function:tra…				COG0204(I:Lipid transport and metabolism)	COG0204(Acyltransferase)	PF03982.16(DAGAT:Diacylglycerol acyltransferase)	sp|Q9ZVN2|PES1_ARATH(Phytyl ester synthase 1, chloroplastic OS=Arabidopsis thaliana OX=3702 GN=PES1 PE=1 SV=1)
MsG0080047788.01	MsG0080047788.01		2451	1.12162	0.165586	0.57978	0.819029	no	up	0.866807	-0.206217	0.552932	0.809144	no	down	0.76958	-0.377856	0.254711	0.969859	no	down	XP_013450639.1(exportin-T [Medicago truncatula])	GO:0005737(cellular_component:cytoplasm); GO:0000049(molecular_function:tRNA binding); GO:0071528(biological_process:tRNA re-export from nucleus); GO:0005643(cellular_component:nuclear pore); GO:0006886(biological_process:intracellular protein transport); GO:0008536(molecular_function:Ran GTPase binding); GO:0031267(molecular_function:small GTPase binding); GO:0005488(molecular_function:binding);…	K14288	XPOT	map03013(Nucleocytoplasmic transport)	ENOG410XZDZ(J:Translation, ribosomal structure and biogenesis)	ENOG410XZDZ(tRNA nucleus export receptor which facilitates tRNA translocation across the nuclear pore complex. Involved in pre- tRNA splicing, probably by affecting the interaction of pre-tRNA with splicing endonuclease (By similarity))	PF19282.2(Exportin-T:Exportin-T); PF08389.15(Xpo1:Exportin 1-like protein); PF03810.22(IBN_N:Importin-beta N-terminal domain)	sp|Q7PC79|XPOT_ARATH(Exportin-T OS=Arabidopsis thaliana OX=3702 GN=PSD PE=2 SV=1)
MsG0080047789.01	MsG0080047789.01		1032	2.12567	1.08792	0.358793	0.661455	no	up	1.57172	0.65234	0.522017	0.791848	no	up	0.737553	-0.439182	0.738398	0.999405	no	down	XP_039684261.1(ion channel CASTOR isoform X3 [Medicago truncatula])	GO:0006811(biological_process:ion transport); GO:0031965(cellular_component:nuclear membrane); GO:0016021(cellular_component:integral component of membrane)	K21866	POLLUX, DMI1, CASTOR		COG1226(P:Inorganic ion transport and metabolism)	COG1226(PotAssium voltage-gated channel)		sp|Q5H8A6|CASTO_LOTJA(Ion channel CASTOR OS=Lotus japonicus OX=34305 GN=CASTOR PE=1 SV=1)
MsG0080047790.01	MsG0080047790.01		804	1.71463	0.7779	0.00597629	0.0544064	no	up	1.34225	0.42465	0.216278	0.508613	no	up	0.780601	-0.357343	0.209826	0.950609	no	down	KEH24676.1(LA-related protein 6 LA RNA-binding domain protein, putative [Medicago truncatula])	GO:0005844(cellular_component:polysome); GO:0005634(cellular_component:nucleus); GO:1990904(cellular_component:ribonucleoprotein complex); GO:0030529(cellular_component:intracellular ribonucleoprotein complex); GO:0003723(molecular_function:RNA binding); GO:0008168(molecular_function:methyltransferase activity); GO:0006396(biological_process:RNA processing); GO:0003729(molecular_function:mRNA bin…	K15191	LARP7		ENOG4110VUA(S:Function unknown)	ENOG4110VUA(La ribonucleoprotein domain family member 6)	PF05383.20(La:La domain); PF07145.18(PAM2:Ataxin-2 C-terminal region)	sp|O80567|LRP6B_ARATH(La-related protein 6B OS=Arabidopsis thaliana OX=3702 GN=LARP6B PE=1 SV=2)
MsG0080047791.01	MsG0080047791.01		411	1.16519	0.220562	0.564967	0.809043	no	up	1.92243	0.942931	0.0057221	0.044045	no	up	1.64355	0.716818	0.026767	0.603028	no	up	XP_024637245.1(cx9C motif-containing protein 4 [Medicago truncatula])					ENOG410Y7TM(S:Function unknown)	ENOG410Y7TM(Domain of unknown function (DUF1903))	PF08991.13(MTCP1:Mature-T-Cell Proliferation I type)
MsG0080047792.01	MsG0080047792.01		4407	1	0	1	1	no test	no test	6.88725	2.78393	0.377398	1	no	up	6.23438	2.64025	0.407204	1	no	up	RDX87443.1(hypothetical protein CR513_31080, partial [Mucuna pruriens])	GO:0016787(molecular_function:hydrolase activity); GO:0008270(molecular_function:zinc ion binding); GO:0003676(molecular_function:nucleic acid binding)				ENOG410YF14(S:Function unknown)	ENOG410YF14(zinc knuckle family protein)	PF01107.21(MP:Viral movement protein (MP)); PF17919.4(RT_RNaseH_2:RNase H-like domain found in reverse transcriptase); PF01719.20(Rep_2:Plasmid replication protein); PF00098.26(zf-CCHC:Zinc knuckle)	sp|P15631|MVP_SOCMV(Movement protein OS=Soybean chlorotic mottle virus OX=10651 GN=ORF I PE=3 SV=1)
MsG0080047793.01	MsG0080047793.01		666	0.72075	-0.47243	0.282072	0.586368	no	down	0.80691	-0.30952	0.504396	0.780366	no	down	1.11486	0.156862	0.751436	0.999405	no	up	RHN65172.1(putative RNA helicase [Medicago truncatula])	GO:0016787(molecular_function:hydrolase activity); GO:0016021(cellular_component:integral component of membrane); GO:0004386(molecular_function:helicase activity); GO:0003724(molecular_function:RNA helicase activity); GO:0003723(molecular_function:RNA binding); GO:0003676(molecular_function:nucleic acid binding); GO:0005524(molecular_function:ATP binding)	K18995	DHX29		COG1643(L:Replication, recombination and repair)	COG1643(helicase)	PF05340.15(DUF740:Protein of unknown function (DUF740))	sp|F4I9Q5|DEXH7_ARATH(DExH-box ATP-dependent RNA helicase DExH7, chloroplastic OS=Arabidopsis thaliana OX=3702 GN=At1g58060 PE=2 SV=1)
MsG0080047794.01	MsG0080047794.01		936	0.237482	-2.07411	0.605054	1	no	down	0.164867	-2.60063	0.516738	1	no	down	1	0	1	1	no test	no test	XP_045809567.1(F-box/kelch-repeat protein At3g23880-like [Trifolium pratense])					ENOG410Z2HM(S:Function unknown)	ENOG410Z2HM(F-box Kelch-repeat protein)		sp|Q9LIR8|FBK67_ARATH(F-box/kelch-repeat protein At3g23880 OS=Arabidopsis thaliana OX=3702 GN=At3g23880 PE=2 SV=1)
MsG0080047795.01	MsG0080047795.01		777	2.14091	1.09822	0.787821	1	no	up	1	0	1	1	no test	no test	0.354222	-1.49727	0.713666	1	no	down	KAI5391570.1(hypothetical protein KIW84_076400 [Pisum sativum])	GO:0004497(molecular_function:monooxygenase activity); GO:0016705(molecular_function:oxidoreductase activity, acting on paired donors, with incorporation or reduction of molecular oxygen); GO:0020037(molecular_function:heme binding); GO:0016021(cellular_component:integral component of membrane); GO:0016020(cellular_component:membrane); GO:0005506(molecular_function:iron ion binding); GO:0055114(b…				COG2124(Q:Secondary metabolites biosynthesis, transport and catabolism)	COG2124(Cytochrome p450)	PF03470.17(zf-XS:XS zinc finger domain)	sp|A0A2Z5D852|C71Z6_PASSA(5-OH-xanthotoxin synthase OS=Pastinaca sativa OX=4041 GN=CYP71AZ6 PE=1 SV=1)
MsG0080047796.01	MsG0080047796.01		591	1	0	1	1	no test	no test	1	0	1	1	no test	no test	1	0	1	1	no test	no test	XP_039687382.1(auxin response factor 17 [Medicago truncatula])	GO:0006355(biological_process:regulation of transcription, DNA-templated); GO:0005634(cellular_component:nucleus); GO:0009734(biological_process:auxin-activated signaling pathway); GO:0003677(molecular_function:DNA binding)				ENOG410ZJKK(K:Transcription)	ENOG410ZJKK(auxin response factor)		sp|Q84WU6|ARFQ_ARATH(Auxin response factor 17 OS=Arabidopsis thaliana OX=3702 GN=ARF17 PE=2 SV=1)
MsG0080047797.01	MsG0080047797.01		1656	0.493647	-1.01845	0.174486	0.460976	no	down	0.451138	-1.14836	0.0713012	0.258499	no	down	0.913683	-0.130234	0.872764	0.999405	no	down	ALN97043.1(putative LRR receptor-like serine/threonine-protein kinase GSO2-like protein [Medicago truncatula])	GO:0016310(biological_process:phosphorylation); GO:0016021(cellular_component:integral component of membrane); GO:0016301(molecular_function:kinase activity); GO:0005515(molecular_function:protein binding); GO:0004674(molecular_function:protein serine/threonine kinase activity)				COG4886(S:Function unknown)	COG4886(leucine Rich Repeat)	PF13855.9(LRR_8:Leucine rich repeat); PF12799.10(LRR_4:Leucine Rich repeats (2 copies))	sp|Q6JN46|EIX2_SOLLC(Receptor-like protein EIX2 OS=Solanum lycopersicum OX=4081 GN=EIX2 PE=1 SV=2)
MsG0080047798.01	MsG0080047798.01		285	0.348492	-1.5208	0.707643	1	no	down	0.471021	-1.08614	0.788838	1	no	down	1.34376	0.426279	0.916798	1	no	up	KEH33597.1(hypothetical protein MTR_3g448730 [Medicago truncatula])	GO:0052924(molecular_function:all-trans-nonaprenyl-diphosphate synthase (geranylgeranyl-diphosphate specific) activity); GO:0052923(molecular_function:all-trans-nonaprenyl-diphosphate synthase (geranyl-diphosphate specific) activity); GO:0015074(biological_process:DNA integration); GO:0008270(molecular_function:zinc ion binding); GO:0003676(molecular_function:nucleic acid binding); GO:0003964(mol…				COG2801(L:Replication, recombination and repair)	COG2801(Retrotransposon protein)		sp|P04146|COPIA_DROME(Copia protein OS=Drosophila melanogaster OX=7227 GN=GIP PE=1 SV=3)
MsG0080047799.01	MsG0080047799.01		276	1	0	1	1	no test	no test	1	0	1	1	no test	no test	1	0	1	1	no test	no test	ABN06136.1(RNA-directed DNA polymerase (Reverse transcriptase); Ribonuclease H [Medicago truncatula])	GO:0006310(biological_process:DNA recombination); GO:0005634(cellular_component:nucleus); GO:0004523(molecular_function:RNA-DNA hybrid ribonuclease activity); GO:0003887(molecular_function:DNA-directed DNA polymerase activity); GO:0015074(biological_process:DNA integration); GO:0030430(cellular_component:host cell cytoplasm); GO:0003723(molecular_function:RNA binding); GO:0003676(molecular_functi…
MsG0080047800.01	MsG0080047800.01		372	1	0	1	1	no test	no test	1	0	1	1	no test	no test	1	0	1	1	no test	no test	XP_039682981.1(uncharacterized protein LOC112422824 [Medicago truncatula])	GO:0003676(molecular_function:nucleic acid binding)
MsG0080047801.01	MsG0080047801.01		348	1	0	1	1	no test	no test	1	0	1	1	no test	no test	1	0	1	1	no test	no test	XP_024626611.1(uncharacterized protein LOC112416592 [Medicago truncatula])
MsG0080047802.01	MsG0080047802.01		939	7.76626	2.95722	0.45687	1	no	up	1	0	1	1	no	no change	0.0983253	-3.34629	0.399899	1	no	down	KAH1251825.1(Aspartate--tRNA ligase, chloroplastic/mitochondrial [Glycine max])	GO:0005737(cellular_component:cytoplasm); GO:0004812(molecular_function:aminoacyl-tRNA ligase activity); GO:0004815(molecular_function:aspartate-tRNA ligase activity); GO:0003677(molecular_function:DNA binding); GO:0005739(cellular_component:mitochondrion); GO:0000166(molecular_function:nucleotide binding); GO:0005488(molecular_function:binding); GO:0006418(biological_process:tRNA aminoacylation …	K01876	DARS2, aspS	map00970(Aminoacyl-tRNA biosynthesis)	COG0173(J:Translation, ribosomal structure and biogenesis)	COG0173(aspartyl-trna synthetase)	PF01851.25(PC_rep:Proteasome/cyclosome repeat); PF00152.23(tRNA-synt_2:tRNA synthetases class II (D, K and N)); PF13646.9(HEAT_2:HEAT repeats)	sp|F4JJT9|SYDM_ARATH(Aspartate--tRNA ligase, chloroplastic/mitochondrial OS=Arabidopsis thaliana OX=3702 GN=At4g33760 PE=2 SV=1)
MsG0080047803.01	MsG0080047803.01		907	1.23807	0.308087	0.590467	0.824484	no	up	0.726011	-0.461936	0.523827	0.792635	no	down	0.586316	-0.770249	0.292919	0.980149	no	down	KAI5428396.1(Acyl carrier protein 2 [Pisum sativum])	GO:0006633(biological_process:fatty acid biosynthetic process); GO:0000036(molecular_function:ACP phosphopantetheine attachment site binding involved in fatty acid biosynthetic process); GO:0000035(molecular_function:acyl binding); GO:0005739(cellular_component:mitochondrion)	K03955	NDUFAB1	map00190(Oxidative phosphorylation)	COG0236(I:Lipid transport and metabolism)	COG0236(Carrier of the growing fatty acid chain in fatty acid biosynthesis (By similarity))	PF00550.28(PP-binding:Phosphopantetheine attachment site)	sp|O80800|ACPM2_ARATH(Acyl carrier protein 2, mitochondrial OS=Arabidopsis thaliana OX=3702 GN=MTACP2 PE=1 SV=1)
MsG0080047804.01	MsG0080047804.01		309	1.28928	0.366562	0.87698	1	no	up	0.569778	-0.811528	0.695478	1	no	down	0.444552	-1.16958	0.625915	1	no	down	XP_024633096.1(IRK-interacting protein [Medicago truncatula])					ENOG410Y9VT(S:Function unknown)	ENOG410Y9VT(expressed protein)		sp|Q9LXU9|IRKI_ARATH(IRK-interacting protein OS=Arabidopsis thaliana OX=3702 GN=IRKI PE=1 SV=1)
MsG0080047805.01	MsG0080047805.01		237	0.94819	-0.0767522	0.983669	1	no	down	0.164867	-2.60063	0.516738	1	no	down	0.172205	-2.5378	0.528438	1	no	down	XP_024633096.1(IRK-interacting protein [Medicago truncatula])					ENOG410Y9VT(S:Function unknown)	ENOG410Y9VT(expressed protein)		sp|Q9LXU9|IRKI_ARATH(IRK-interacting protein OS=Arabidopsis thaliana OX=3702 GN=IRKI PE=1 SV=1)
MsG0080047806.01	MsG0080047806.01		669	0.927029	-0.109313	0.825573	0.936742	no	down	0.545431	-0.874533	0.181423	0.459335	no	down	0.58799	-0.766138	0.432181	0.999405	no	down	RWR87211.1(26S proteasome non-ATPase regulatory subunit 1 A-like protein [Cinnamomum micranthum f. kanehirae])	GO:0005737(cellular_component:cytoplasm); GO:0004812(molecular_function:aminoacyl-tRNA ligase activity); GO:0030234(molecular_function:enzyme regulator activity); GO:0042176(biological_process:regulation of protein catabolic process); GO:0005488(molecular_function:binding); GO:0000502(cellular_component:proteasome complex); GO:0016021(cellular_component:integral component of membrane); GO:0005524…	K03032	PSMD1, RPN2	map03050(Proteasome)	COG5116(O:Posttranslational modification, protein turnover, chaperones)	COG5116(26s proteasome)	PF01851.25(PC_rep:Proteasome/cyclosome repeat); PF13646.9(HEAT_2:HEAT repeats)	sp|Q9MAT0|PSD1B_ARATH(26S proteasome non-ATPase regulatory subunit 1 homolog B OS=Arabidopsis thaliana OX=3702 GN=RPN2B PE=1 SV=1)
MsG0080047807.01	MsG0080047807.01		486	1	0	1	1	no test	no test	1.48247	0.567999	0.889293	1	no	up	1.34376	0.426279	0.916798	1	no	up	RWR87211.1(26S proteasome non-ATPase regulatory subunit 1 A-like protein [Cinnamomum micranthum f. kanehirae])	GO:0030234(molecular_function:enzyme regulator activity); GO:0042176(biological_process:regulation of protein catabolic process); GO:0005488(molecular_function:binding); GO:0000502(cellular_component:proteasome complex); GO:0016021(cellular_component:integral component of membrane); GO:0008540(cellular_component:proteasome regulatory particle, base subcomplex)	K03032	PSMD1, RPN2	map03050(Proteasome)	COG5116(O:Posttranslational modification, protein turnover, chaperones)	COG5116(26s proteasome)	PF01851.25(PC_rep:Proteasome/cyclosome repeat); PF13646.9(HEAT_2:HEAT repeats)	sp|Q9MAT0|PSD1B_ARATH(26S proteasome non-ATPase regulatory subunit 1 homolog B OS=Arabidopsis thaliana OX=3702 GN=RPN2B PE=1 SV=1)
MsG0080047808.01	MsG0080047808.01		468	1	0	1	1	no test	no test	1	0	1	1	no test	no test	1	0	1	1	no test	no test	XP_039683011.1(uncharacterized protein LOC120576093 [Medicago truncatula])	GO:0003676(molecular_function:nucleic acid binding)
MsG0080047809.01	MsG0080047809.01		729	2.14091	1.09822	0.787821	1	no	up	1	0	1	1	no test	no test	0.354222	-1.49727	0.713666	1	no	down	KEH29542.1(hypothetical protein MTR_4g044687 [Medicago truncatula])
MsG0080047810.01	MsG0080047810.01		432	1	0	1	1	no test	no test	1	0	1	1	no test	no test	1	0	1	1	no test	no test	KEH33599.1(transmembrane protein, putative [Medicago truncatula])	GO:0016021(cellular_component:integral component of membrane)
MsG0080047811.01	MsG0080047811.01		279	0.0490824	-4.34865	0.0487191	1	no	down	0.241804	-2.04809	0.269135	1	no	down	4.87595	2.28568	0.56523	1	no	up	KEH39668.1(hypothetical protein MTR_2g105430 [Medicago truncatula])					ENOG410YUES(S:Function unknown)	ENOG410YUES(expressed protein)
MsG0080047812.01	MsG0080047812.01		861	0.793491	-0.333714	0.507673	0.776308	no	down	0.7138	-0.486407	0.401829	0.697709	no	down	0.89705	-0.156739	0.787501	0.999405	no	down	KEH39668.1(hypothetical protein MTR_2g105430 [Medicago truncatula])					ENOG410YUES(S:Function unknown)	ENOG410YUES(expressed protein)
MsG0080047813.01	MsG0080047813.01		969	0.808986	-0.305813	0.609288	0.836003	no	down	0.915515	-0.127345	0.824348	0.943628	no	down	1.12677	0.172198	0.7648	0.999405	no	up	RHN76619.1(putative fasciclin-like arabinogalactan protein [Medicago truncatula])	GO:0016021(cellular_component:integral component of membrane)				ENOG410YHCU(S:Function unknown)	ENOG410YHCU(Fasciclin-like arabinogalactan protein)		sp|Q9LTW9|FLA14_ARATH(Fasciclin-like arabinogalactan protein 14 OS=Arabidopsis thaliana OX=3702 GN=FLA14 PE=2 SV=1)
MsG0080047814.01	MsG0080047814.01		1392	0.943414	-0.0840367	0.75927	0.910883	no	down	0.966262	-0.0495137	0.861189	0.95661	no	down	1.02113	0.0301634	0.887522	0.999405	no	up	XP_013465631.1(ubiquitin receptor RAD23b [Medicago truncatula])	GO:0005829(cellular_component:cytosol); GO:0070628(molecular_function:proteasome binding); GO:0043161(biological_process:proteasome-mediated ubiquitin-dependent protein catabolic process); GO:0005634(cellular_component:nucleus); GO:0006289(biological_process:nucleotide-excision repair); GO:0005654(cellular_component:nucleoplasm); GO:0043130(molecular_function:ubiquitin binding); GO:0005515(molecu…	K10839	RAD23, HR23	map03420(Nucleotide excision repair); map04141(Protein processing in endoplasmic reticulum)	COG5272(O:Posttranslational modification, protein turnover, chaperones)	COG5272(ubiquitin)	PF00627.34(UBA:UBA/TS-N domain); PF00240.26(ubiquitin:Ubiquitin family); PF09280.14(XPC-binding:XPC-binding domain); PF11976.11(Rad60-SLD:Ubiquitin-2 like Rad60 SUMO-like)	sp|Q84L33|RD23B_ARATH(Ubiquitin receptor RAD23b OS=Arabidopsis thaliana OX=3702 GN=RAD23B PE=1 SV=3)
MsG0080047815.01	MsG0080047815.01		1794	0.823673	-0.279856	0.72322	0.894561	no	down	1.02147	0.0306484	0.966617	0.990792	no	up	1.22947	0.298037	0.612199	0.999405	no	up	XP_013465630.1(tubby-like protein 8 [Medicago truncatula])		K19600	TUB, TULP		ENOG410XQFT(S:Function unknown)	ENOG410XQFT(tubby like protein)	PF01167.21(Tub:Tub family)	sp|Q9S9M8|TLP8_ARATH(Tubby-like protein 8 OS=Arabidopsis thaliana OX=3702 GN=TULP8 PE=2 SV=1)
MsG0080047816.01	MsG0080047816.01		666	1	0	1	1	no test	no test	1	0	1	1	no test	no test	1	0	1	1	no test	no test	RHN77747.1(putative nucleotidyltransferase, Ribonuclease H [Medicago truncatula])	GO:0006310(biological_process:DNA recombination); GO:0005634(cellular_component:nucleus); GO:0004523(molecular_function:RNA-DNA hybrid ribonuclease activity); GO:0003887(molecular_function:DNA-directed DNA polymerase activity); GO:0015074(biological_process:DNA integration); GO:0004190(molecular_function:aspartic-type endopeptidase activity); GO:0003723(molecular_function:RNA binding); GO:0003964…
MsG0080047817.01	MsG0080047817.01		480	0.155019	-2.68948	0.169422	1	no	down	0.215358	-2.21519	0.179783	0.457692	no	down	1.38463	0.469499	0.815649	1	no	up	XP_013453150.1(lachrymatory-factor synthase [Medicago truncatula])	GO:0005737(cellular_component:cytoplasm); GO:0009738(biological_process:abscisic acid-activated signaling pathway); GO:0004864(molecular_function:protein phosphatase inhibitor activity); GO:0005886(cellular_component:plasma membrane)				ENOG410ZQ8W(S:Function unknown)	ENOG410ZQ8W(Polyketide cyclase / dehydrase and lipid transport)	PF10604.12(Polyketide_cyc2:Polyketide cyclase / dehydrase and lipid transport)
MsG0080047818.01	MsG0080047818.01		1122	0.165159	-2.59808	0.0131474	0.0933948	no	down	0.28035	-1.8347	0.0654156	0.244533	no	down	1.69594	0.762089	0.327497	0.988198	no	up	ABN07950.1(hypothetical protein MtrDRAFT_AC152185g2v2 [Medicago truncatula])	GO:0004252(molecular_function:serine-type endopeptidase activity); GO:0051607(biological_process:defense response to virus); GO:0009610(biological_process:response to symbiotic fungus); GO:0048046(cellular_component:apoplast); GO:0031047(biological_process:gene silencing by RNA); GO:0006508(biological_process:proteolysis)						PF08387.13(FBD:FBD)
MsG0080047819.01	MsG0080047819.01		396	1	0	1	1	no test	no test	1	0	1	1	no test	no test	1	0	1	1	no test	no test	AES89996.1(hypothetical protein MTR_4g083040 [Medicago truncatula])	GO:0016021(cellular_component:integral component of membrane)						PF10536.12(PMD:Plant mobile domain)
MsG0080047820.01	MsG0080047820.01		687	0.967257	-0.0480289	0.957599	0.988113	no	down	1.63674	0.710824	0.373152	0.676316	no	up	1.68981	0.756864	0.343868	0.988198	no	up	XP_013453147.1(ethylene-responsive transcription factor TINY [Medicago truncatula])	GO:0003700(molecular_function:transcription factor activity, sequence-specific DNA binding); GO:0006355(biological_process:regulation of transcription, DNA-templated); GO:0005634(cellular_component:nucleus); GO:0003677(molecular_function:DNA binding)	K09286	EREBP		ENOG410YM26(K:Transcription); ENOG411144I(K:Transcription)	ENOG410YM26(dehydration-responsive element-binding protein); ENOG411144I(Transcription factor)	PF00847.23(AP2:AP2 domain)	sp|O80654|ERF37_ARATH(Ethylene-responsive transcription factor ERF037 OS=Arabidopsis thaliana OX=3702 GN=ERF037 PE=1 SV=1)
MsG0080047821.01	MsG0080047821.01		435	1	0	1	1	no test	no test	1	0	1	1	no test	no test	1	0	1	1	no test	no test	RHN59159.1(putative nucleic acid-binding protein [Medicago truncatula])	GO:0006310(biological_process:DNA recombination); GO:0016021(cellular_component:integral component of membrane); GO:0051321(biological_process:meiotic cell cycle); GO:0006281(biological_process:DNA repair); GO:0043047(molecular_function:single-stranded telomeric DNA binding); GO:0005634(cellular_component:nucleus); GO:0000724(biological_process:double-strand break repair via homologous recombinat…						PF02721.17(DUF223:Domain of unknown function DUF223)
MsG0080047822.01	MsG0080047822.01		657	0.564352	-0.825332	0.839711	1	no	down	0.761136	-0.393773	0.923122	1	no	down	1.34376	0.426279	0.916798	1	no	up	XP_013453145.1(dehydration-responsive element-binding protein 3 [Medicago truncatula])	GO:0003700(molecular_function:transcription factor activity, sequence-specific DNA binding); GO:0006355(biological_process:regulation of transcription, DNA-templated); GO:0005634(cellular_component:nucleus); GO:0003677(molecular_function:DNA binding)	K09286	EREBP		ENOG410YM26(K:Transcription); ENOG411144I(K:Transcription)	ENOG410YM26(dehydration-responsive element-binding protein); ENOG411144I(Transcription factor)	PF00847.23(AP2:AP2 domain)	sp|Q9LYD3|DREB3_ARATH(Dehydration-responsive element-binding protein 3 OS=Arabidopsis thaliana OX=3702 GN=DREB3 PE=2 SV=1)
MsG0080047823.01	MsG0080047823.01		396	1	0	1	1	no test	no test	1.48247	0.567999	0.889293	1	no	up	1.34376	0.426279	0.916798	1	no	up	ABN05744.1(hypothetical protein MtrDRAFT_AC148775g4v2 [Medicago truncatula])	GO:0006486(biological_process:protein glycosylation); GO:0016757(molecular_function:transferase activity, transferring glycosyl groups)
MsG0080047824.01	MsG0080047824.01		2109	1	0	1	1	no test	no test	1	0	1	1	no test	no test	1	0	1	1	no test	no test	XP_013451157.1(F-box/kelch-repeat protein At3g23880 [Medicago truncatula])	GO:0005515(molecular_function:protein binding)						PF12937.10(F-box-like:F-box-like); PF00646.36(F-box:F-box domain)	sp|Q9LIR8|FBK67_ARATH(F-box/kelch-repeat protein At3g23880 OS=Arabidopsis thaliana OX=3702 GN=At3g23880 PE=2 SV=1)
MsG0080047825.01	MsG0080047825.01		2474	0.967331	-0.0479182	0.856594	0.950825	no	down	1.24432	0.315359	0.261197	0.562223	no	up	1.28262	0.359098	0.0939389	0.842618	no	up	XP_003625106.2(uncharacterized protein LOC11414828 isoform X1 [Medicago truncatula])	GO:0033314(biological_process:mitotic DNA replication checkpoint); GO:0007095(biological_process:mitotic G2 DNA damage checkpoint); GO:0006270(biological_process:DNA replication initiation); GO:0016853(molecular_function:isomerase activity)	K10728	TOPBP1	map03440(Homologous recombination)	ENOG410XPFH(S:Function unknown)	ENOG410XPFH(Topoisomerase (DNA) II binding protein 1)	PF12738.10(PTCB-BRCT:twin BRCT domain); PF00533.29(BRCT:BRCA1 C Terminus (BRCT) domain); PF16589.8(BRCT_2:BRCT domain, a BRCA1 C-terminus domain); PF16759.8(LIG3_BRCT:DNA ligase 3 BRCT domain)	sp|Q6ZQF0|TOPB1_MOUSE(DNA topoisomerase 2-binding protein 1 OS=Mus musculus OX=10090 GN=Topbp1 PE=1 SV=2)
MsG0080047826.01	MsG0080047826.01		1491	0.799797	-0.322295	0.511832	0.777904	no	down	1.02214	0.0315969	0.94979	0.985933	no	up	1.27217	0.347292	0.467855	0.999405	no	up	XP_013464445.2(cytochrome P450 72A68 [Medicago truncatula])	GO:0004497(molecular_function:monooxygenase activity); GO:0016020(cellular_component:membrane); GO:0020037(molecular_function:heme binding); GO:0102375(molecular_function:11-oxo-beta-amyrin 30-oxidase activity); GO:0016021(cellular_component:integral component of membrane); GO:0016705(molecular_function:oxidoreductase activity, acting on paired donors, with incorporation or reduction of molecular…				COG2124(Q:Secondary metabolites biosynthesis, transport and catabolism)	COG2124(Cytochrome p450)	PF00067.25(p450:Cytochrome P450)	sp|Q2MJ19|C7A68_MEDTR(Cytochrome P450 72A68 OS=Medicago truncatula OX=3880 GN=CYP72A68 PE=1 SV=1)
MsG0080047827.01	MsG0080047827.01		1617	1.14635	0.197051	0.877827	1	no	up	0.783161	-0.35262	0.792215	1	no	down	0.681913	-0.552341	0.658738	1	no	down	RHN54409.1(putative retrotransposon gag domain, aspartic peptidase domain-containing protein [Medicago truncatula])	GO:0006508(biological_process:proteolysis); GO:0004190(molecular_function:aspartic-type endopeptidase activity)						PF03732.20(Retrotrans_gag:Retrotransposon gag protein)
MsG0080047828.01	MsG0080047828.01		312	1	0	1	1	no test	no test	1	0	1	1	no test	no test	1	0	1	1	no test	no test	KEH38222.1(hypothetical protein MTR_2g064025 [Medicago truncatula])	GO:0006508(biological_process:proteolysis); GO:0016021(cellular_component:integral component of membrane); GO:0004190(molecular_function:aspartic-type endopeptidase activity)
MsG0080047829.01	MsG0080047829.01		561	1	0	1	1	no test	no test	1	0	1	1	no test	no test	1	0	1	1	no test	no test	AES75745.1(hypothetical protein MTR_6g057540 [Medicago truncatula])
MsG0080047830.01	MsG0080047830.01		444	0.179105	-2.48112	0.533582	1	no	down	0.919887	-0.120471	0.960823	1	no	down	5.01018	2.32486	0.558405	1	no	up	KAI5444837.1(hypothetical protein KIW84_013208 [Pisum sativum])	GO:0005576(cellular_component:extracellular region); GO:0004866(molecular_function:endopeptidase inhibitor activity)						PF00197.21(Kunitz_legume:Trypsin and protease inhibitor)	sp|O82711|PIP22_PEA(Kunitz-type trypsin inhibitor-like 2 protein OS=Pisum sativum OX=3888 GN=PIP20-2 PE=3 SV=1)
MsG0080047831.01	MsG0080047831.01		612	6.09248	2.60703	0.00254531	0.0294259	yes	up	1.67903	0.747626	0.418872	0.711986	no	up	0.273665	-1.86952	0.0400209	0.690371	no	down	XP_003619561.1(kunitz-type trypsin inhibitor-like 2 protein [Medicago truncatula])	GO:0005576(cellular_component:extracellular region); GO:0004866(molecular_function:endopeptidase inhibitor activity)						PF00197.21(Kunitz_legume:Trypsin and protease inhibitor)	sp|O82711|PIP22_PEA(Kunitz-type trypsin inhibitor-like 2 protein OS=Pisum sativum OX=3888 GN=PIP20-2 PE=3 SV=1)
MsG0080047832.01	MsG0080047832.01		903	0.948249	-0.0766615	0.832715	0.940598	no	down	1.43047	0.516489	0.13374	0.38558	no	up	1.50445	0.589232	0.0614794	0.767952	no	up	XP_003608017.1(nodulation protein H isoform X1 [Medicago truncatula])	GO:0016787(molecular_function:hydrolase activity); GO:0016021(cellular_component:integral component of membrane)				ENOG410XT9Y(S:Function unknown)	ENOG410XT9Y(Nodulation protein)	PF13469.9(Sulfotransfer_3:Sulfotransferase family)
MsG0080047833.01	MsG0080047833.01		831	1	0	1	1	no test	no test	1.48247	0.567999	0.889293	1	no	up	1.34376	0.426279	0.916798	1	no	up
MsG0080047834.01	MsG0080047834.01		246	0.564352	-0.825332	0.839711	1	no	down	0.390785	-1.35555	0.739734	1	no	down	1	0	1	1	no test	no test
MsG0080047835.01	MsG0080047835.01		891	0.45395	-1.1394	0.597612	1	no	down	0.669444	-0.578964	0.71269	1	no	down	1.47223	0.558003	0.807371	1	no	up	RHN58831.1(putative retrotransposon gag domain, aspartic peptidase domain-containing protein [Medicago truncatula])	GO:0006508(biological_process:proteolysis); GO:0004190(molecular_function:aspartic-type endopeptidase activity)
MsG0080047836.01	MsG0080047836.01		900	1	0	1	1	no test	no test	1	0	1	1	no test	no test	1	0	1	1	no test	no test	KEH25249.1(RNI superfamily protein, putative [Medicago truncatula])	GO:0005737(cellular_component:cytoplasm); GO:0031146(biological_process:SCF-dependent proteasomal ubiquitin-dependent protein catabolic process); GO:0019005(cellular_component:SCF ubiquitin ligase complex)	K10268	FBXL2_20				PF12799.10(LRR_4:Leucine Rich repeats (2 copies))
MsG0080047837.01	MsG0080047837.01		1132	0.631133	-0.663985	0.054675	0.234451	no	down	0.563638	-0.82716	0.0198016	0.107635	no	down	0.890669	-0.167038	0.629127	0.999405	no	down	XP_013453065.1(uncharacterized protein LOC25496896 [Medicago truncatula])	GO:0009269(biological_process:response to desiccation); GO:0016021(cellular_component:integral component of membrane)				ENOG4112C6K(S:Function unknown)	ENOG4112C6K(Late embryogenesis abundant protein)	PF03168.16(LEA_2:Late embryogenesis abundant protein); PF07092.15(DUF1356:Protein of unknown function (DUF1356))
MsG0080047838.01	MsG0080047838.01		600	0.498269	-1.005	0.678113	1	no	down	0.844754	-0.243398	0.910927	1	no	down	1.69481	0.761127	0.760227	1	no	up	XP_024628732.1(uncharacterized protein LOC112417364 [Medicago truncatula])
MsG0080047839.01	MsG0080047839.01		330	1	0	1	1	no test	no test	1	0	1	1	no test	no test	1	0	1	1	no test	no test	RHN51962.1(putative nucleotidyltransferase, Ribonuclease H [Medicago truncatula])	GO:0006310(biological_process:DNA recombination); GO:0016779(molecular_function:nucleotidyltransferase activity); GO:0005634(cellular_component:nucleus); GO:0004523(molecular_function:RNA-DNA hybrid ribonuclease activity); GO:0003887(molecular_function:DNA-directed DNA polymerase activity); GO:0015074(biological_process:DNA integration); GO:0004190(molecular_function:aspartic-type endopeptidase a…				COG2801(L:Replication, recombination and repair)	COG2801(Retrotransposon protein)
MsG0080047840.01	MsG0080047840.01		1227	1.45824	0.544226	0.583766	0.820842	no	up	1.13746	0.185814	0.864025	0.957863	no	up	0.780349	-0.357809	0.691616	0.999405	no	down	KEH29525.1(hypothetical protein MTR_4g043765 [Medicago truncatula])
MsG0080047841.01	MsG0080047841.01		1752	0.53389	-0.905384	0.367995	0.670125	no	down	0.458031	-1.12648	0.291502	0.595976	no	down	0.856793	-0.222981	0.849618	0.999405	no	down	AES76690.2(ABC transporter-like family-protein [Medicago truncatula])	GO:0016787(molecular_function:hydrolase activity); GO:0042626(molecular_function:ATPase activity, coupled to transmembrane movement of substances); GO:0016021(cellular_component:integral component of membrane); GO:0016020(cellular_component:membrane); GO:0140359(molecular_function:ABC-type transmembrane transporter activity); GO:0055085(biological_process:transmembrane transport); GO:0005524(mole…				COG1132(V:Defense mechanisms)	COG1132((ABC) transporter)	PF00664.26(ABC_membrane:ABC transporter transmembrane region)	sp|Q8LGU1|AB8C_ARATH(ABC transporter C family member 8 OS=Arabidopsis thaliana OX=3702 GN=ABCC8 PE=2 SV=3)
MsG0080047842.01	MsG0080047842.01		543	1	0	1	1	no test	no test	1	0	1	1	no test	no test	1	0	1	1	no test	no test	KEH19372.1(hypothetical protein MTR_8g052425 [Medicago truncatula])
MsG0080047843.01	MsG0080047843.01		574	1	0	1	1	no test	no test	1	0	1	1	no test	no test	1	0	1	1	no test	no test	KEH26112.1(hypothetical protein MTR_6g445330 [Medicago truncatula])
MsG0080047844.01	MsG0080047844.01		357	0.309084	-1.69393	0.675111	1	no	down	1.53275	0.616127	0.813179	1	no	up	4.971	2.31353	0.505339	1	no	up	KEH38222.1(hypothetical protein MTR_2g064025 [Medicago truncatula])	GO:0006508(biological_process:proteolysis); GO:0016021(cellular_component:integral component of membrane); GO:0004190(molecular_function:aspartic-type endopeptidase activity)
MsG0080047845.01	MsG0080047845.01		228	1	0	1	1	no test	no test	1	0	1	1	no test	no test	1	0	1	1	no test	no test	ABN06136.1(RNA-directed DNA polymerase (Reverse transcriptase); Ribonuclease H [Medicago truncatula])	GO:0006310(biological_process:DNA recombination); GO:0005634(cellular_component:nucleus); GO:0004523(molecular_function:RNA-DNA hybrid ribonuclease activity); GO:0003887(molecular_function:DNA-directed DNA polymerase activity); GO:0015074(biological_process:DNA integration); GO:0030430(cellular_component:host cell cytoplasm); GO:0003723(molecular_function:RNA binding); GO:0003676(molecular_functi…						PF17919.4(RT_RNaseH_2:RNase H-like domain found in reverse transcriptase)	sp|P03359|POL_WMSV(Gag-Pol polyprotein OS=Woolly monkey sarcoma virus OX=11970 GN=pol PE=3 SV=2)
MsG0080047846.01	MsG0080047846.01		342	1	0	1	1	no test	no test	1.48247	0.567999	0.889293	1	no	up	1.34376	0.426279	0.916798	1	no	up	ABE88103.1(Ribonuclease H [Medicago truncatula])	GO:0006310(biological_process:DNA recombination); GO:0005634(cellular_component:nucleus); GO:0004523(molecular_function:RNA-DNA hybrid ribonuclease activity); GO:0003887(molecular_function:DNA-directed DNA polymerase activity); GO:0015074(biological_process:DNA integration); GO:0004190(molecular_function:aspartic-type endopeptidase activity); GO:0003723(molecular_function:RNA binding); GO:0003676…
MsG0080047847.01	MsG0080047847.01		738	1	0	1	1	no test	no test	1	0	1	1	no test	no test	1	0	1	1	no test	no test
MsG0080047848.01	MsG0080047848.01		1167	1	0	1	1	no test	no test	1	0	1	1	no test	no test	1	0	1	1	no test	no test	KEH21621.1(hypothetical protein MTR_7g010875 [Medicago truncatula])
MsG0080047849.01	MsG0080047849.01		738	0.564352	-0.825332	0.839711	1	no	down	0.390785	-1.35555	0.739734	1	no	down	1	0	1	1	no test	no test	RHN58831.1(putative retrotransposon gag domain, aspartic peptidase domain-containing protein [Medicago truncatula])	GO:0006508(biological_process:proteolysis); GO:0004190(molecular_function:aspartic-type endopeptidase activity)						PF03732.20(Retrotrans_gag:Retrotransposon gag protein)
MsG0080047850.01	MsG0080047850.01		222	1	0	1	1	no test	no test	1	0	1	1	no test	no test	1	0	1	1	no test	no test	AES98289.1(transmembrane protein, putative [Medicago truncatula])	GO:0016021(cellular_component:integral component of membrane); GO:0003677(molecular_function:DNA binding)						PF02362.24(B3:B3 DNA binding domain)
MsG0080047851.01	MsG0080047851.01		3375	0.622836	-0.683077	0.440694	0.729812	no	down	0.746024	-0.422706	0.693843	0.886448	no	down	1.19763	0.260185	0.826341	0.999405	no	up	RHN52794.1(putative xenobiotic-transporting ATPase [Medicago truncatula])	GO:0016787(molecular_function:hydrolase activity); GO:0042626(molecular_function:ATPase activity, coupled to transmembrane movement of substances); GO:0016021(cellular_component:integral component of membrane); GO:0016020(cellular_component:membrane); GO:0140359(molecular_function:ABC-type transmembrane transporter activity); GO:0016887(molecular_function:ATPase activity); GO:0055085(biological_p…				COG1132(V:Defense mechanisms)	COG1132((ABC) transporter)	PF00005.30(ABC_tran:ABC transporter); PF00664.26(ABC_membrane:ABC transporter transmembrane region)	sp|Q8LGU1|AB8C_ARATH(ABC transporter C family member 8 OS=Arabidopsis thaliana OX=3702 GN=ABCC8 PE=2 SV=3)
MsG0080047852.01	MsG0080047852.01		339	1	0	1	1	no test	no test	1	0	1	1	no test	no test	1	0	1	1	no test	no test
MsG0080047853.01	MsG0080047853.01		642	1	0	1	1	no test	no test	1	0	1	1	no test	no test	1	0	1	1	no test	no test	RHN60097.1(hypothetical protein MtrunA17_Chr4g0021661 [Medicago truncatula])
MsG0080047854.01	MsG0080047854.01		345	0.348492	-1.5208	0.707643	1	no	down	0.241832	-2.04792	0.613576	1	no	down	1	0	1	1	no test	no test	KEH33597.1(hypothetical protein MTR_3g448730 [Medicago truncatula])	GO:0052924(molecular_function:all-trans-nonaprenyl-diphosphate synthase (geranylgeranyl-diphosphate specific) activity); GO:0052923(molecular_function:all-trans-nonaprenyl-diphosphate synthase (geranyl-diphosphate specific) activity); GO:0015074(biological_process:DNA integration); GO:0008270(molecular_function:zinc ion binding); GO:0003676(molecular_function:nucleic acid binding); GO:0003964(mol…				COG2801(L:Replication, recombination and repair)	COG2801(Retrotransposon protein)		sp|P04146|COPIA_DROME(Copia protein OS=Drosophila melanogaster OX=7227 GN=GIP PE=1 SV=3)
MsG0080047855.01	MsG0080047855.01		735	0.564352	-0.825332	0.839711	1	no	down	0.390785	-1.35555	0.739734	1	no	down	1	0	1	1	no test	no test	RHN77304.1(putative RNA-directed DNA polymerase [Medicago truncatula])	GO:0003964(molecular_function:RNA-directed DNA polymerase activity); GO:0015074(biological_process:DNA integration); GO:0008270(molecular_function:zinc ion binding); GO:0003676(molecular_function:nucleic acid binding); GO:0003899(molecular_function:DNA-directed RNA polymerase activity)				COG2801(L:Replication, recombination and repair)	COG2801(Retrotransposon protein)		sp|Q94HW2|POLR1_ARATH(Retrovirus-related Pol polyprotein from transposon RE1 OS=Arabidopsis thaliana OX=3702 GN=RE1 PE=2 SV=1)
MsG0080047856.01	MsG0080047856.01		654	1.89912	0.925333	0.782384	1	no	up	1.45018	0.536236	0.875457	1	no	up	0.758972	-0.397881	0.898229	1	no	down	RHN77304.1(putative RNA-directed DNA polymerase [Medicago truncatula])	GO:0003964(molecular_function:RNA-directed DNA polymerase activity); GO:0015074(biological_process:DNA integration); GO:0008270(molecular_function:zinc ion binding); GO:0003676(molecular_function:nucleic acid binding); GO:0003899(molecular_function:DNA-directed RNA polymerase activity)				COG2801(L:Replication, recombination and repair)	COG2801(Retrotransposon protein)		sp|P04146|COPIA_DROME(Copia protein OS=Drosophila melanogaster OX=7227 GN=GIP PE=1 SV=3)
MsG0080047857.01	MsG0080047857.01		948	0.348492	-1.5208	0.707643	1	no	down	0.882831	-0.17979	0.964252	1	no	down	2.53485	1.3419	0.739525	1	no	up	XP_039683908.1(ATP-dependent DNA helicase PIF1 [Medicago truncatula])	GO:0000723(biological_process:telomere maintenance); GO:0016787(molecular_function:hydrolase activity); GO:0006281(biological_process:DNA repair); GO:0006310(biological_process:DNA recombination); GO:0016887(molecular_function:ATPase activity); GO:0003678(molecular_function:DNA helicase activity); GO:0005524(molecular_function:ATP binding)	K15255	PIF1				PF05970.17(PIF1:PIF1-like helicase)	sp|Q0R4F1|PIF1_XENLA(ATP-dependent DNA helicase PIF1 OS=Xenopus laevis OX=8355 GN=pif1 PE=2 SV=1)
MsG0080047858.01	MsG0080047858.01		579	3.69689	1.88631	0.641233	1	no	up	1	0	1	1	no test	no test	0.20379	-2.29484	0.570698	1	no	down	KEH33222.1(hypothetical protein MTR_3g028620 [Medicago truncatula])
MsG0080047859.01	MsG0080047859.01		1284	3.89423	1.96134	0.516034	1	no	up	6.21495	2.63574	0.420925	1	no	up	1.58727	0.666545	0.789688	1	no	up	KEH16643.1(hypothetical protein MTR_0126s0010 [Medicago truncatula])							PF20167.1(Transposase_32:Putative plant transposon protein)
MsG0080047860.01	MsG0080047860.01		252	1	0	1	1	no test	no test	1	0	1	1	no test	no test	1	0	1	1	no test	no test	XP_045791429.1(uncharacterized mitochondrial protein AtMg00810-like [Trifolium pratense])	GO:0019773(cellular_component:proteasome core complex, alpha-subunit complex); GO:0015074(biological_process:DNA integration); GO:0006511(biological_process:ubiquitin-dependent protein catabolic process); GO:0008270(molecular_function:zinc ion binding); GO:0003676(molecular_function:nucleic acid binding); GO:0003964(molecular_function:RNA-directed DNA polymerase activity)
MsG0080047861.01	MsG0080047861.01		2142	1.65539	0.727167	0.072578	0.279229	no	up	1.42829	0.514294	0.24041	0.537555	no	up	0.860012	-0.217572	0.600841	0.999405	no	down	KAE9594305.1(putative lysine--tRNA ligase [Lupinus albus])	GO:0004824(molecular_function:lysine-tRNA ligase activity); GO:0005737(cellular_component:cytoplasm); GO:0004812(molecular_function:aminoacyl-tRNA ligase activity); GO:0006430(biological_process:lysyl-tRNA aminoacylation); GO:0005829(cellular_component:cytosol); GO:0003677(molecular_function:DNA binding); GO:0000166(molecular_function:nucleotide binding); GO:0000049(molecular_function:tRNA bindin…	K04567	KARS, lysS	map00970(Aminoacyl-tRNA biosynthesis)	COG1190(J:Translation, ribosomal structure and biogenesis)	COG1190(lysyl-trna synthetase)	PF00152.23(tRNA-synt_2:tRNA synthetases class II (D, K and N)); PF01336.28(tRNA_anti-codon:OB-fold nucleic acid binding domain); PF14389.9(Lzipper-MIP1:Leucine-zipper of ternary complex factor MIP1)	sp|Q9ZPI1|SYKC_ARATH(Lysine--tRNA ligase, cytoplasmic OS=Arabidopsis thaliana OX=3702 GN=At3g11710 PE=1 SV=1)
MsG0080047862.01	MsG0080047862.01		2127	0.650671	-0.620001	0.838434	1	no	down	0.442784	-1.17532	0.704333	1	no	down	0.676394	-0.564064	0.846714	1	no	down	RHN51506.1(putative transcription factor interactor and regulator CCHC(Zn) family [Medicago truncatula])	GO:0003964(molecular_function:RNA-directed DNA polymerase activity); GO:0015074(biological_process:DNA integration); GO:0008270(molecular_function:zinc ion binding); GO:0003676(molecular_function:nucleic acid binding)	K00979	kdsB	map01250(Biosynthesis of nucleotide sugars)			PF14223.9(Retrotran_gag_2:gag-polypeptide of LTR copia-type); PF00098.26(zf-CCHC:Zinc knuckle); PF13696.9(zf-CCHC_2:Zinc knuckle)
MsG0080047863.01	MsG0080047863.01		603	1.96642	0.975575	0.593555	1	no	up	1.00492	0.00707919	0.99718	1	no	up	0.506109	-0.982481	0.540807	1	no	down	XP_039682973.1(uncharacterized protein LOC120576071 [Medicago truncatula])	GO:0015074(biological_process:DNA integration); GO:0003676(molecular_function:nucleic acid binding)
MsG0080047864.01	MsG0080047864.01		2067	10.209	3.35176	0.164293	1	no	up	4.32212	2.11174	0.546418	1	no	up	0.417257	-1.26099	0.571393	1	no	down	RHN45120.1(putative transcription factor interactor and regulator CCHC(Zn) family [Medicago truncatula])	GO:0003964(molecular_function:RNA-directed DNA polymerase activity); GO:0015074(biological_process:DNA integration); GO:0008270(molecular_function:zinc ion binding); GO:0003676(molecular_function:nucleic acid binding)	K00979	kdsB	map01250(Biosynthesis of nucleotide sugars)			PF14223.9(Retrotran_gag_2:gag-polypeptide of LTR copia-type); PF00078.30(RVT_1:Reverse transcriptase (RNA-dependent DNA polymerase)); PF00098.26(zf-CCHC:Zinc knuckle); PF13696.9(zf-CCHC_2:Zinc knuckle)
MsG0080047865.01	MsG0080047865.01		669	0.549993	-0.862514	0.655224	1	no	down	0.259056	-1.94866	0.346612	1	no	down	0.468873	-1.09273	0.685151	1	no	down	RHN55789.1(putative nucleotidyltransferase, Ribonuclease H [Medicago truncatula])	GO:0016787(molecular_function:hydrolase activity); GO:0016779(molecular_function:nucleotidyltransferase activity); GO:0004523(molecular_function:RNA-DNA hybrid ribonuclease activity); GO:0015074(biological_process:DNA integration); GO:0004190(molecular_function:aspartic-type endopeptidase activity); GO:0008270(molecular_function:zinc ion binding); GO:0003676(molecular_function:nucleic acid bindin…				COG2801(L:Replication, recombination and repair)	COG2801(Retrotransposon protein)	PF17917.4(RT_RNaseH:RNase H-like domain found in reverse transcriptase); PF17919.4(RT_RNaseH_2:RNase H-like domain found in reverse transcriptase)	sp|P04323|POL3_DROME(Retrovirus-related Pol polyprotein from transposon 17.6 OS=Drosophila melanogaster OX=7227 GN=pol PE=4 SV=1)
MsG0080047866.01	MsG0080047866.01		285	1	0	1	1	no test	no test	1	0	1	1	no test	no test	1	0	1	1	no test	no test	XP_028223129.1(uncharacterized protein LOC114404329, partial [Glycine soja])	GO:0015074(biological_process:DNA integration); GO:0061630(molecular_function:ubiquitin protein ligase activity); GO:0008270(molecular_function:zinc ion binding); GO:0003676(molecular_function:nucleic acid binding)
MsG0080047867.01	MsG0080047867.01		426	1	0	1	1	no test	no test	1	0	1	1	no test	no test	1	0	1	1	no test	no test	RHN55789.1(putative nucleotidyltransferase, Ribonuclease H [Medicago truncatula])	GO:0015074(biological_process:DNA integration); GO:0016740(molecular_function:transferase activity); GO:0004190(molecular_function:aspartic-type endopeptidase activity); GO:0008270(molecular_function:zinc ion binding); GO:0003676(molecular_function:nucleic acid binding); GO:0003964(molecular_function:RNA-directed DNA polymerase activity); GO:0006508(biological_process:proteolysis)
MsG0080047868.01	MsG0080047868.01		2850	1.20752	0.272053	0.402493	0.698568	no	up	1.15406	0.206724	0.609746	0.843326	no	up	0.95203	-0.0709205	0.842675	0.999405	no	down	XP_013463768.1(vacuolar protein sorting-associated protein 54, chloroplastic [Medicago truncatula])	GO:0006896(biological_process:Golgi to vacuole transport); GO:0000938(cellular_component:GARP complex); GO:0005829(cellular_component:cytosol); GO:0019905(molecular_function:syntaxin binding); GO:0042147(biological_process:retrograde transport, endosome to Golgi); GO:0015031(biological_process:protein transport)	K17600	VPS54		ENOG410XQ3K(U:Intracellular trafficking, secretion, and vesicular transport)	ENOG410XQ3K(vacuolar protein sorting 54 homolog (S. cerevisiae))	PF07928.15(Vps54:Vps54-like protein)	sp|F4JT76|VPS54_ARATH(Vacuolar protein sorting-associated protein 54, chloroplastic OS=Arabidopsis thaliana OX=3702 GN=VPS54 PE=1 SV=1)
MsG0080047869.01	MsG0080047869.01		1491	1.49023	0.575538	0.126302	0.385672	no	up	1.42357	0.509513	0.210747	0.500867	no	up	0.9524	-0.0703597	0.839928	0.999405	no	down	XP_003606271.2(peptidyl-prolyl cis-trans isomerase PASTICCINO1 [Medicago truncatula])	GO:0005737(cellular_component:cytoplasm); GO:0009826(biological_process:unidimensional cell growth); GO:0030010(biological_process:establishment of cell polarity); GO:0009880(biological_process:embryonic pattern specification); GO:0009735(biological_process:response to cytokinin); GO:0030154(biological_process:cell differentiation); GO:0000413(biological_process:protein peptidyl-prolyl isomerizat…				COG0545(O:Posttranslational modification, protein turnover, chaperones)	COG0545(Peptidyl-prolyl cis-trans isomerase)	PF07719.20(TPR_2:Tetratricopeptide repeat); PF00515.31(TPR_1:Tetratricopeptide repeat); PF13432.9(TPR_16:Tetratricopeptide repeat); PF13181.9(TPR_8:Tetratricopeptide repeat); PF13371.9(TPR_9:Tetratricopeptide repeat); PF14559.9(TPR_19:Tetratricopeptide repeat); PF13414.9(TPR_11:TPR repeat); PF13431.9(TPR_17:Tetratricopeptide repeat)	sp|Q7DMA9|PAS1_ARATH(Peptidyl-prolyl cis-trans isomerase PASTICCINO1 OS=Arabidopsis thaliana OX=3702 GN=PAS1 PE=1 SV=2)
MsG0080047870.01	MsG0080047870.01		231	1	0	1	1	no test	no test	1	0	1	1	no test	no test	1	0	1	1	no test	no test	RHN45312.1(putative RNA-directed DNA polymerase [Medicago truncatula])	GO:0003964(molecular_function:RNA-directed DNA polymerase activity); GO:0015074(biological_process:DNA integration); GO:0008270(molecular_function:zinc ion binding); GO:0003676(molecular_function:nucleic acid binding)
MsG0080047871.01	MsG0080047871.01		822	1	0	1	1	no test	no test	1	0	1	1	no test	no test	1	0	1	1	no test	no test	XP_045802363.1(uncharacterized protein LOC123895943 [Trifolium pratense])							PF01107.21(MP:Viral movement protein (MP))	sp|P15631|MVP_SOCMV(Movement protein OS=Soybean chlorotic mottle virus OX=10651 GN=ORF I PE=3 SV=1)
MsG0080047872.01	MsG0080047872.01		1875	1.00395	0.00568394	0.989404	0.997243	no	up	0.743287	-0.428009	0.404789	0.700373	no	down	0.739333	-0.435704	0.258101	0.972114	no	down	XP_003607085.1(amidophosphoribosyltransferase, chloroplastic [Medicago truncatula])	GO:0005737(cellular_component:cytoplasm); GO:0004044(molecular_function:amidophosphoribosyltransferase activity); GO:0051536(molecular_function:iron-sulfur cluster binding); GO:0009113(biological_process:purine nucleobase biosynthetic process); GO:0006189(biological_process:'de novo' IMP biosynthetic process); GO:0009116(biological_process:nucleoside metabolic process); GO:0006164(biological_proc…	K00764	purF, PPAT	map00250(Alanine, aspartate and glutamate metabolism); map00230(Purine metabolism)	COG0034(F:Nucleotide transport and metabolism)	COG0034(glutamine phosphoribosylpyrophosphate amidotransferase)	PF13537.9(GATase_7:Glutamine amidotransferase domain); PF13522.9(GATase_6:Glutamine amidotransferase domain); PF00156.30(Pribosyltran:Phosphoribosyl transferase domain); PF13230.9(GATase_4:Glutamine amidotransferases class-II)	sp|Q9STG9|ASE2_ARATH(Amidophosphoribosyltransferase 2, chloroplastic OS=Arabidopsis thaliana OX=3702 GN=ASE2 PE=1 SV=1)
MsG0080047873.01	MsG0080047873.01		882	1.0682	0.0951831	0.797776	0.926425	no	up	1.10245	0.14071	0.735885	0.905822	no	up	1.03139	0.0445859	0.917164	0.999405	no	up	KAI5388362.1(hypothetical protein KIW84_074162 [Pisum sativum])	GO:0003700(molecular_function:transcription factor activity, sequence-specific DNA binding); GO:0005634(cellular_component:nucleus)				ENOG410YAHK(K:Transcription)	ENOG410YAHK(Transcription factor)		sp|Q9SIG8|BZP30_ARATH(bZIP transcription factor 30 OS=Arabidopsis thaliana OX=3702 GN=BZIP30 PE=1 SV=1)
MsG0080047874.01	MsG0080047874.01		1071	0.958455	-0.0612169	0.913825	0.973627	no	down	1.05484	0.0770189	0.883141	0.963611	no	up	1.10005	0.137563	0.800287	0.999405	no	up	XP_024636736.1(polyprenol reductase 1 [Medicago truncatula])	GO:0005737(cellular_component:cytoplasm); GO:0006629(biological_process:lipid metabolic process); GO:0006488(biological_process:dolichol-linked oligosaccharide biosynthetic process); GO:0003865(molecular_function:3-oxo-5-alpha-steroid 4-dehydrogenase activity); GO:0016021(cellular_component:integral component of membrane); GO:0102389(molecular_function:polyprenol reductase activity); GO:0016095(b…	K12345	SRD5A3	map00510(N-Glycan biosynthesis)	ENOG4111JQM(S:Function unknown)	ENOG4111JQM(Plays a key role in early steps of protein N-linked glycosylation by being required for the conversion of polyprenol into dolichol. Dolichols are required for the synthesis of dolichol-linked monosaccharides and the oligosaccharide precursor used for N-glycosylation. Acts as a polyprenol reductase that promotes the reduction of the alpha-isoprene unit of polyprenols into dolichols in …	PF02544.19(Steroid_dh:3-oxo-5-alpha-steroid 4-dehydrogenase)	sp|A2XWN6|POED1_ORYSI(Polyprenol reductase 1 OS=Oryza sativa subsp. indica OX=39946 GN=OsI_17065 PE=3 SV=1)
MsG0080047875.01	MsG0080047875.01		1362	1.17247	0.229557	0.484216	0.761496	no	up	1.50201	0.586894	0.101096	0.324136	no	up	1.27719	0.35297	0.255056	0.97019	no	up	XP_003607080.1(NADP-dependent D-sorbitol-6-phosphate dehydrogenase [Medicago truncatula])	GO:0004032(molecular_function:alditol:NADP+ 1-oxidoreductase activity); GO:0005829(cellular_component:cytosol); GO:0050088(molecular_function:mannose-6-phosphate 6-reductase activity); GO:0047641(molecular_function:aldose-6-phosphate reductase (NADPH) activity); GO:0055114(biological_process:oxidation-reduction process); GO:0016491(molecular_function:oxidoreductase activity)				COG0656(S:Function unknown)	COG0656(reductase)	PF00248.24(Aldo_ket_red:Aldo/keto reductase family)	sp|P28475|S6PD_MALDO(NADP-dependent D-sorbitol-6-phosphate dehydrogenase OS=Malus domestica OX=3750 GN=S6PDH PE=2 SV=1)
MsG0080047876.01	MsG0080047876.01		1784	1.21243	0.277898	0.43167	0.722905	no	up	1.01846	0.0263952	0.934926	0.981079	no	up	0.837221	-0.25632	0.400134	0.999405	no	down	XP_003607078.1(epimerase family protein SDR39U1 homolog, chloroplastic [Medicago truncatula])	GO:0050662(molecular_function:coenzyme binding); GO:0003824(molecular_function:catalytic activity); GO:0045552(molecular_function:dihydrokaempferol 4-reductase activity); GO:0016021(cellular_component:integral component of membrane); GO:0015991(biological_process:ATP hydrolysis coupled proton transport); GO:0033179(cellular_component:proton-transporting V-type ATPase, V0 domain); GO:0015078(molec…	K07071	K07071		COG1090(S:Function unknown)	COG1090(Epimerase)	PF00137.24(ATP-synt_C:ATP synthase subunit C); PF08338.14(DUF1731:Domain of unknown function (DUF1731)); PF01370.24(Epimerase:NAD dependent epimerase/dehydratase family)	sp|Q9SJU9|GC1_ARATH(Epimerase family protein SDR39U1 homolog, chloroplastic OS=Arabidopsis thaliana OX=3702 GN=GC1 PE=2 SV=2)
MsG0080047877.01	MsG0080047877.01		1894	0.564549	-0.82483	0.0466343	0.21404	no	down	0.522235	-0.937228	0.0285652	0.13853	no	down	0.923379	-0.115005	0.70409	0.999405	no	down	XP_003607077.1(polyol transporter 5 [Medicago truncatula])	GO:0005351(molecular_function:sugar:proton symporter activity); GO:0015293(molecular_function:symporter activity); GO:0005215(molecular_function:transporter activity); GO:0016021(cellular_component:integral component of membrane); GO:0016020(cellular_component:membrane); GO:0015144(molecular_function:carbohydrate transmembrane transporter activity); GO:0022857(molecular_function:transmembrane tra…				ENOG410XNQK(G:Carbohydrate transport and metabolism)	ENOG410XNQK(Transporter)	PF00083.27(Sugar_tr:Sugar (and other) transporter); PF07690.19(MFS_1:Major Facilitator Superfamily)	sp|Q8VZ80|PLT5_ARATH(Polyol transporter 5 OS=Arabidopsis thaliana OX=3702 GN=PLT5 PE=1 SV=2)
MsG0080047878.01	MsG0080047878.01		2193	0.57241	-0.804878	0.0904882	0.317252	no	down	0.535586	-0.900811	0.0515005	0.208023	no	down	0.93114	-0.102931	0.787464	0.999405	no	down	XP_003607076.3(arginine decarboxylase [Medicago truncatula])	GO:0008792(molecular_function:arginine decarboxylase activity); GO:0009446(biological_process:putrescine biosynthetic process); GO:0006527(biological_process:arginine catabolic process); GO:0003824(molecular_function:catalytic activity); GO:0009409(biological_process:response to cold); GO:0033388(biological_process:putrescine biosynthetic process from arginine); GO:0008295(biological_process:sper…	K01583	E4.1.1.19	map00330(Arginine and proline metabolism)	COG1166(E:Amino acid transport and metabolism)	COG1166(Catalyzes the biosynthesis of agmatine from arginine (By similarity))	PF02784.19(Orn_Arg_deC_N:Pyridoxal-dependent decarboxylase, pyridoxal binding domain)	sp|Q43075|SPE1_PEA(Arginine decarboxylase OS=Pisum sativum OX=3888 PE=2 SV=1)
MsG0080047879.01	MsG0080047879.01		912	2.14091	1.09822	0.787821	1	no	up	1.48247	0.567999	0.889293	1	no	up	0.689922	-0.535494	0.895591	1	no	down	AES76214.2(DUF223 domain protein [Medicago truncatula])	GO:0006310(biological_process:DNA recombination); GO:0051321(biological_process:meiotic cell cycle); GO:0005840(cellular_component:ribosome); GO:0006281(biological_process:DNA repair); GO:0043047(molecular_function:single-stranded telomeric DNA binding); GO:0005634(cellular_component:nucleus); GO:0000724(biological_process:double-strand break repair via homologous recombination); GO:0006289(biolo…						PF16900.8(REPA_OB_2:Replication protein A OB domain); PF01336.28(tRNA_anti-codon:OB-fold nucleic acid binding domain)
MsG0080047880.01	MsG0080047880.01		207	1	0	1	1	no test	no test	1	0	1	1	no test	no test	1	0	1	1	no test	no test	XP_024626750.1(ATP-dependent DNA helicase PIF1-like [Medicago truncatula])	GO:0000723(biological_process:telomere maintenance); GO:0016787(molecular_function:hydrolase activity); GO:0006281(biological_process:DNA repair); GO:0005634(cellular_component:nucleus); GO:0005657(cellular_component:replication fork); GO:0000785(cellular_component:chromatin); GO:0006310(biological_process:DNA recombination); GO:0003678(molecular_function:DNA helicase activity); GO:0006260(biolog…	K06671;K15255	STAG1_2, SCC3, IRR1;PIF1				PF05970.17(PIF1:PIF1-like helicase)
MsG0080047881.01	MsG0080047881.01		1871	1.39595	0.48125	0.577189	0.81767	no	up	2.09025	1.06368	0.210388	0.500449	no	up	1.48826	0.573623	0.419284	0.999405	no	up	XP_013468354.1(kinetochore-associated protein KNL-2 homolog isoform X2 [Medicago truncatula])	GO:0016021(cellular_component:integral component of membrane)				ENOG410ZE5E(S:Function unknown)	ENOG410ZE5E(SANTA (SANT Associated))	PF09133.13(SANTA:SANTA (SANT Associated))	sp|F4KCE9|KNL2_ARATH(Kinetochore-associated protein KNL-2 homolog OS=Arabidopsis thaliana OX=3702 GN=KNL2 PE=1 SV=1)
MsG0080047882.01	MsG0080047882.01		444	0.247348	-2.01538	0.323051	1	no	down	0.438484	-1.18941	0.469425	1	no	down	1.79315	0.842493	0.768229	1	no	up	XP_013457030.1(uncharacterized protein LOC25493156 [Medicago truncatula])					ENOG410YC9T(S:Function unknown)	ENOG410YC9T(Plant-specific domain TIGR01615 family protein)	PF04720.15(PDDEXK_6:PDDEXK-like family of unknown function)
MsG0080047883.01	MsG0080047883.01		981	1	0	1	1	no test	no test	1	0	1	1	no test	no test	1	0	1	1	no test	no test	PNX99052.1(cytochrome p450 71a1-like protein [Trifolium pratense])	GO:0016020(cellular_component:membrane); GO:0004497(molecular_function:monooxygenase activity); GO:0102934(molecular_function:costunolide synthase activity); GO:0020037(molecular_function:heme binding); GO:0016709(molecular_function:oxidoreductase activity, acting on paired donors, with incorporation or reduction of molecular oxygen, NAD(P)H as one donor, and incorporation of one atom of oxygen);…				COG2124(Q:Secondary metabolites biosynthesis, transport and catabolism)	COG2124(Cytochrome p450)	PF00067.25(p450:Cytochrome P450)	sp|H2DH18|C7A12_PANGI(Cytochrome P450 CYP736A12 OS=Panax ginseng OX=4054 PE=2 SV=1)
MsG0080047884.01	MsG0080047884.01		771	1.39922	0.484621	0.751931	0.907195	no	up	2.18026	1.1245	0.385398	0.685074	no	up	1.5691	0.64994	0.555998	0.999405	no	up	PNX99052.1(cytochrome p450 71a1-like protein [Trifolium pratense])	GO:0016020(cellular_component:membrane); GO:0004497(molecular_function:monooxygenase activity); GO:0102934(molecular_function:costunolide synthase activity); GO:0020037(molecular_function:heme binding); GO:0016709(molecular_function:oxidoreductase activity, acting on paired donors, with incorporation or reduction of molecular oxygen, NAD(P)H as one donor, and incorporation of one atom of oxygen);…				COG2124(Q:Secondary metabolites biosynthesis, transport and catabolism)	COG2124(Cytochrome p450)	PF00067.25(p450:Cytochrome P450)	sp|H2DH18|C7A12_PANGI(Cytochrome P450 CYP736A12 OS=Panax ginseng OX=4054 PE=2 SV=1)
MsG0080047885.01	MsG0080047885.01		504	1.23034	0.299052	0.687584	0.878243	no	up	1.41981	0.505697	0.507281	0.782416	no	up	1.15397	0.20661	0.778944	0.999405	no	up	RHN56493.1(putative cytochrome P450 [Medicago truncatula])	GO:0004497(molecular_function:monooxygenase activity); GO:0016705(molecular_function:oxidoreductase activity, acting on paired donors, with incorporation or reduction of molecular oxygen); GO:0020037(molecular_function:heme binding); GO:0016709(molecular_function:oxidoreductase activity, acting on paired donors, with incorporation or reduction of molecular oxygen, NAD(P)H as one donor, and incorp…				COG2124(Q:Secondary metabolites biosynthesis, transport and catabolism)	COG2124(Cytochrome p450)	PF00067.25(p450:Cytochrome P450)	sp|H2DH18|C7A12_PANGI(Cytochrome P450 CYP736A12 OS=Panax ginseng OX=4054 PE=2 SV=1)
MsG0080047886.01	MsG0080047886.01		681	1	0	1	1	no test	no test	1	0	1	1	no test	no test	1	0	1	1	no test	no test	XP_039688947.1(methyl-CpG-binding domain-containing protein 7 [Medicago truncatula])	GO:0005634(cellular_component:nucleus); GO:0003677(molecular_function:DNA binding)				ENOG4111HPQ(S:Function unknown)	ENOG4111HPQ(Methyl-CpG binding domain protein)	PF01429.22(MBD:Methyl-CpG binding domain)	sp|Q9FJF4|MBD7_ARATH(Methyl-CpG-binding domain-containing protein 7 OS=Arabidopsis thaliana OX=3702 GN=MBD7 PE=1 SV=1)
MsG0080047887.01	MsG0080047887.01		1662	1	0	1	1	no test	no test	1.48247	0.567999	0.889293	1	no	up	1.34376	0.426279	0.916798	1	no	up	XP_045832350.1(F-box/LRR-repeat protein 16-like [Trifolium pratense])	GO:0005737(cellular_component:cytoplasm); GO:0031146(biological_process:SCF-dependent proteasomal ubiquitin-dependent protein catabolic process); GO:0005515(molecular_function:protein binding); GO:0019005(cellular_component:SCF ubiquitin ligase complex)	K10268	FBXL2_20				PF12799.10(LRR_4:Leucine Rich repeats (2 copies)); PF00646.36(F-box:F-box domain); PF13855.9(LRR_8:Leucine rich repeat); PF12937.10(F-box-like:F-box-like)	sp|Q8NEE6|DRC6_HUMAN(Dynein regulatory complex subunit 6 OS=Homo sapiens OX=9606 GN=FBXL13 PE=2 SV=3)
MsG0080047888.01	MsG0080047888.01		528	1	0	1	1	no test	no test	1	0	1	1	no test	no test	1	0	1	1	no test	no test	XP_039688947.1(methyl-CpG-binding domain-containing protein 7 [Medicago truncatula])	GO:0005634(cellular_component:nucleus); GO:0003677(molecular_function:DNA binding)				ENOG4111HPQ(S:Function unknown)	ENOG4111HPQ(Methyl-CpG binding domain protein)	PF01429.22(MBD:Methyl-CpG binding domain)	sp|Q9FJF4|MBD7_ARATH(Methyl-CpG-binding domain-containing protein 7 OS=Arabidopsis thaliana OX=3702 GN=MBD7 PE=1 SV=1)
MsG0080047889.01	MsG0080047889.01		591	1	0	1	1	no test	no test	1	0	1	1	no test	no test	1	0	1	1	no test	no test	XP_024638304.1(SCF E3 ubiquitin ligase complex F-box protein grrA [Medicago truncatula])	GO:0005737(cellular_component:cytoplasm)	K10268	FBXL2_20				PF12799.10(LRR_4:Leucine Rich repeats (2 copies))	sp|Q6BIN3|AMN1_DEBHA(Antagonist of mitotic exit network protein 1 OS=Debaryomyces hansenii (strain ATCC 36239 / CBS 767 / BCRC 21394 / JCM 1990 / NBRC 0083 / IGC 2968) OX=284592 GN=AMN1 PE=3 SV=2)
MsG0080047890.01	MsG0080047890.01		1623	0.309084	-1.69393	0.675111	1	no	down	0.778645	-0.360963	0.92804	1	no	down	2.53485	1.3419	0.739525	1	no	up	XP_045829174.1(dynein regulatory complex subunit 6-like [Trifolium pratense])	GO:0005737(cellular_component:cytoplasm); GO:0031146(biological_process:SCF-dependent proteasomal ubiquitin-dependent protein catabolic process); GO:0005515(molecular_function:protein binding); GO:0019005(cellular_component:SCF ubiquitin ligase complex)	K10268	FBXL2_20				PF12799.10(LRR_4:Leucine Rich repeats (2 copies)); PF00646.36(F-box:F-box domain)	sp|Q9SN10|FBL16_ARATH(F-box/LRR-repeat protein 16 OS=Arabidopsis thaliana OX=3702 GN=FBL16 PE=2 SV=1)
MsG0080047891.01	MsG0080047891.01		345	1	0	1	1	no test	no test	1.48247	0.567999	0.889293	1	no	up	1.34376	0.426279	0.916798	1	no	up	KEH33597.1(hypothetical protein MTR_3g448730 [Medicago truncatula])	GO:0052924(molecular_function:all-trans-nonaprenyl-diphosphate synthase (geranylgeranyl-diphosphate specific) activity); GO:0052923(molecular_function:all-trans-nonaprenyl-diphosphate synthase (geranyl-diphosphate specific) activity); GO:0015074(biological_process:DNA integration); GO:0008270(molecular_function:zinc ion binding); GO:0003676(molecular_function:nucleic acid binding); GO:0003964(mol…				COG2801(L:Replication, recombination and repair)	COG2801(Retrotransposon protein)		sp|P04146|COPIA_DROME(Copia protein OS=Drosophila melanogaster OX=7227 GN=GIP PE=1 SV=3)
MsG0080047892.01	MsG0080047892.01		285	1	0	1	1	no test	no test	1	0	1	1	no	no change	1	0	1	1	no	no change	KEH33597.1(hypothetical protein MTR_3g448730 [Medicago truncatula])	GO:0052924(molecular_function:all-trans-nonaprenyl-diphosphate synthase (geranylgeranyl-diphosphate specific) activity); GO:0052923(molecular_function:all-trans-nonaprenyl-diphosphate synthase (geranyl-diphosphate specific) activity); GO:0015074(biological_process:DNA integration); GO:0008270(molecular_function:zinc ion binding); GO:0003676(molecular_function:nucleic acid binding); GO:0003964(mol…				COG2801(L:Replication, recombination and repair)	COG2801(Retrotransposon protein)		sp|P04146|COPIA_DROME(Copia protein OS=Drosophila melanogaster OX=7227 GN=GIP PE=1 SV=3)
MsG0080047893.01	MsG0080047893.01		582	1	0	1	1	no test	no test	1	0	1	1	no test	no test	1	0	1	1	no test	no test	AES70076.1(hypothetical protein MTR_3g047490 [Medicago truncatula])
MsG0080047894.01	MsG0080047894.01		519	4.04674	2.01676	0.617298	1	no	up	1	0	1	1	no test	no test	0.186844	-2.4201	0.548724	1	no	down	RHN46366.1(hypothetical protein MtrunA17_Chr7g0241461 [Medicago truncatula])
MsG0080047895.01	MsG0080047895.01		441	0.253619	-1.97926	0.622264	1	no	down	0.342376	-1.54635	0.700326	1	no	down	1.34376	0.426279	0.916798	1	no	up	KAI5396416.1(hypothetical protein KIW84_062580 [Pisum sativum])	GO:0015074(biological_process:DNA integration); GO:0003676(molecular_function:nucleic acid binding)				COG2801(L:Replication, recombination and repair)	COG2801(Retrotransposon protein)
MsG0080047896.01	MsG0080047896.01		1041	2.38672	1.25503	0.537472	1	no	up	3.45518	1.78876	0.245191	1	no	up	1.46594	0.551831	0.706314	1	no	up	RHN58937.1(putative transcription factor bZIP family [Medicago truncatula])
MsG0080047897.01	MsG0080047897.01		2922	0.546229	-0.872423	0.00456502	0.0452135	no	down	0.617333	-0.69588	0.0573354	0.223647	no	down	1.12808	0.173873	0.601246	0.999405	no	up	AES76274.2(disease resistance protein (TIR-NBS-LRR class) [Medicago truncatula])	GO:0016787(molecular_function:hydrolase activity); GO:0005975(biological_process:carbohydrate metabolic process); GO:0005515(molecular_function:protein binding); GO:0016021(cellular_component:integral component of membrane); GO:0006952(biological_process:defense response); GO:0004560(molecular_function:alpha-L-fucosidase activity); GO:0007165(biological_process:signal transduction); GO:0043531(mo…						PF01582.23(TIR:TIR domain); PF00931.25(NB-ARC:NB-ARC domain); PF13676.9(TIR_2:TIR domain); PF12799.10(LRR_4:Leucine Rich repeats (2 copies)); PF13855.9(LRR_8:Leucine rich repeat); PF13191.9(AAA_16:AAA ATPase domain); PF05729.15(NACHT:NACHT domain)	sp|V9M398|RUN1_VITRO(Disease resistance protein RUN1 OS=Vitis rotundifolia OX=103349 GN=RUN1 PE=1 SV=1)
MsG0080047898.01	MsG0080047898.01		756	1.57202	0.652618	0.417293	0.712313	no	up	1.88337	0.913315	0.0731808	0.26253	no	up	1.19649	0.258809	0.709513	0.999405	no	up	PNY07122.1(replication factor C subunit 3-like protein [Trifolium pratense])	GO:0006281(biological_process:DNA repair); GO:0005634(cellular_component:nucleus); GO:0005663(cellular_component:DNA replication factor C complex); GO:0006260(biological_process:DNA replication); GO:0006261(biological_process:DNA-dependent DNA replication); GO:0003677(molecular_function:DNA binding)	K10756	RFC3_5	map03430(Mismatch repair); map03420(Nucleotide excision repair); map03030(DNA replication)			PF05673.16(DUF815:Protein of unknown function (DUF815)); PF03193.19(RsgA_GTPase:RsgA GTPase); PF00005.30(ABC_tran:ABC transporter)	sp|Q8VXX4|RFC3_ARATH(Replication factor C subunit 3 OS=Arabidopsis thaliana OX=3702 GN=RFC3 PE=2 SV=1)
MsG0080047899.01	MsG0080047899.01		1174	7.12656	2.83321	1.49849e-05	0.000582619	yes	up	5.94482	2.57163	5.41765e-05	0.00116504	yes	up	0.831425	-0.266343	0.602731	0.999405	no	down	XP_013455085.1(axial regulator YABBY 1 [Medicago truncatula])	GO:0032502(biological_process:developmental process); GO:0045165(biological_process:cell fate commitment); GO:0009944(biological_process:polarity specification of adaxial/abaxial axis); GO:0010154(biological_process:fruit development); GO:0010158(biological_process:abaxial cell fate specification); GO:0005634(cellular_component:nucleus); GO:1902183(biological_process:regulation of shoot apical me…	K25796	YAB		ENOG410YG5N(K:Transcription)	ENOG410YG5N(axial regulator YABBY)	PF04690.16(YABBY:YABBY protein); PF09011.13(HMG_box_2:HMG-box domain)	sp|O22152|YAB1_ARATH(Axial regulator YABBY 1 OS=Arabidopsis thaliana OX=3702 GN=YAB1 PE=1 SV=1)
MsG0080047900.01	MsG0080047900.01		771	40.7171	5.34756	0.0760184	1	no	up	210.455	7.71737	7.54185e-08	4.76552e-06	yes	up	5.17583	2.37179	0.268864	0.976444	no	up	AES71451.2(histone deacetylase superfamily protein [Medicago truncatula])	GO:0006325(biological_process:chromatin organization); GO:0004407(molecular_function:histone deacetylase activity); GO:0016021(cellular_component:integral component of membrane); GO:0016575(biological_process:histone deacetylation); GO:0006357(biological_process:regulation of transcription from RNA polymerase II promoter); GO:0046872(molecular_function:metal ion binding); GO:0005634(cellular_comp…	K06067	HDAC1_2		COG0123(B:Chromatin structure and dynamics); COG0123(Q:Secondary metabolites biosynthesis, transport and catabolism)	COG0123(Histone deacetylase); COG0123(Histone deacetylase)		sp|Q94517|HDAC1_DROME(Histone deacetylase HDAC1 OS=Drosophila melanogaster OX=7227 GN=HDAC1 PE=1 SV=2)
MsG0080047901.01	MsG0080047901.01		1948	1.04477	0.0631797	0.777656	0.918845	no	up	0.975347	-0.0360123	0.909488	0.973613	no	down	0.930892	-0.103314	0.720016	0.999405	no	down	RHN68735.1(putative histone deacetylase [Medicago truncatula])	GO:0006325(biological_process:chromatin organization); GO:0004407(molecular_function:histone deacetylase activity); GO:0016021(cellular_component:integral component of membrane); GO:0016575(biological_process:histone deacetylation); GO:0006357(biological_process:regulation of transcription from RNA polymerase II promoter); GO:0046872(molecular_function:metal ion binding); GO:0005634(cellular_comp…	K06067	HDAC1_2		COG0123(B:Chromatin structure and dynamics); COG0123(Q:Secondary metabolites biosynthesis, transport and catabolism)	COG0123(Histone deacetylase); COG0123(Histone deacetylase)	PF00850.22(Hist_deacetyl:Histone deacetylase domain)	sp|Q9FML2|HDA6_ARATH(Histone deacetylase 6 OS=Arabidopsis thaliana OX=3702 GN=HDA6 PE=1 SV=1)
MsG0080047902.01	MsG0080047902.01		372	5.62621	2.49216	0.53328	1	no	up	1	0	1	1	no test	no test	0.134491	-2.89442	0.469309	1	no	down	XP_003601206.1(putative pentatricopeptide repeat-containing protein At1g64310 [Medicago truncatula])	GO:0005515(molecular_function:protein binding)				ENOG410Z7Z7(S:Function unknown)	ENOG410Z7Z7(Pentatricopeptide repeat-containing protein)	PF20431.1(E_motif:E motif)	sp|Q9C7V5|PP104_ARATH(Putative pentatricopeptide repeat-containing protein At1g64310 OS=Arabidopsis thaliana OX=3702 GN=PCMP-E65 PE=3 SV=1)
MsG0080047903.01	MsG0080047903.01		429	1	0	1	1	no test	no test	1	0	1	1	no test	no test	1	0	1	1	no test	no test	XP_003601210.2(LOB domain-containing protein 25 [Medicago truncatula])					ENOG4111S1U(S:Function unknown)	ENOG4111S1U(lob domain-containing protein)	PF03195.17(LOB:Lateral organ boundaries (LOB) domain)	sp|Q9FML4|LOB_ARATH(Protein LATERAL ORGAN BOUNDARIES OS=Arabidopsis thaliana OX=3702 GN=LOB PE=1 SV=1)
MsG0080047904.01	MsG0080047904.01		573	0.764125	-0.388119	0.644714	0.855341	no	down	0.974631	-0.0370713	0.965601	0.990555	no	down	1.26862	0.343256	0.701383	0.999405	no	up	XP_003601211.1(tryptophan aminotransferase-related protein 2 [Medicago truncatula])	GO:0003824(molecular_function:catalytic activity); GO:0016846(molecular_function:carbon-sulfur lyase activity); GO:0006520(biological_process:cellular amino acid metabolic process); GO:0008483(molecular_function:transaminase activity)	K16903	TAA1	map00380(Tryptophan metabolism)	ENOG410YMNS(E:Amino acid transport and metabolism)	ENOG410YMNS(tryptophan aminotransferase-related protein 2-like)	PF04864.16(Alliinase_C:Allinase)	sp|Q94A02|TAR2_ARATH(Tryptophan aminotransferase-related protein 2 OS=Arabidopsis thaliana OX=3702 GN=TAR2 PE=2 SV=1)
MsG0080047905.01	MsG0080047905.01		718	0.449329	-1.15416	0.0416401	0.199449	no	down	0.394846	-1.34064	0.00693211	0.0509616	no	down	0.872241	-0.197201	0.710966	0.999405	no	down	AET00829.1(E3 ubiquitin protein ligase RIE1-like protein, putative [Medicago truncatula])	GO:0016021(cellular_component:integral component of membrane)				ENOG41121N2(O:Posttranslational modification, protein turnover, chaperones)	ENOG41121N2(zinc ion binding)	PF13639.9(zf-RING_2:Ring finger domain); PF17123.8(zf-RING_11:RING-like zinc finger); PF12678.10(zf-rbx1:RING-H2 zinc finger domain); PF00097.28(zf-C3HC4:Zinc finger, C3HC4 type (RING finger)); PF13923.9(zf-C3HC4_2:Zinc finger, C3HC4 type (RING finger)); PF14634.9(zf-RING_5:zinc-RING finger domain); PF13445.9(zf-RING_UBOX:RING-type zinc-finger)	sp|Q93Z92|RING4_ARATH(E3 ubiquitin-protein ligase At4g11680 OS=Arabidopsis thaliana OX=3702 GN=At4g11680 PE=2 SV=1)
MsG0080047906.01	MsG0080047906.01		890	0.958049	-0.0618293	0.843029	0.94426	no	down	0.826676	-0.274606	0.379658	0.680868	no	down	0.859177	-0.218974	0.30207	0.980526	no	down	XP_039685042.1(probable receptor-like protein kinase At2g23200 [Medicago truncatula])					COG1916(S:Function unknown)	COG1916(traB family)
MsG0080047907.01	MsG0080047907.01		501	0.970472	-0.0432412	0.928167	0.978488	no	down	1.10084	0.13861	0.757764	0.914966	no	up	1.13186	0.178692	0.67627	0.999405	no	up	RHN42756.1(hypothetical protein MtrunA17_Chr8g0380411 [Medicago truncatula])	GO:0099078(cellular_component:BORC complex); GO:0016021(cellular_component:integral component of membrane); GO:0032418(biological_process:lysosome localization)	K20818	KXD1, BORCS4		ENOG4111UUW(S:Function unknown)	ENOG4111UUW(KxDL motif containing 1)	PF10241.12(KxDL:Uncharacterized conserved protein)	sp|Q80XH1|KXDL1_MOUSE(KxDL motif-containing protein 1 OS=Mus musculus OX=10090 GN=Kxd1 PE=1 SV=1)
MsG0080047908.01	MsG0080047908.01		1548	1.50581	0.590538	0.191937	0.485978	no	up	1.36796	0.452027	0.361214	0.665113	no	up	0.90481	-0.144313	0.780432	0.999405	no	down	XP_003629923.2(YTH domain-containing protein ECT4 [Medicago truncatula])	GO:0005737(cellular_component:cytoplasm); GO:0003723(molecular_function:RNA binding); GO:0061157(biological_process:mRNA destabilization); GO:0003729(molecular_function:mRNA binding)	K20102	YTHDF		ENOG410YABQ(S:Function unknown)	ENOG410YABQ(YTH domain family)		sp|A0A1P8AS03|ECT4_ARATH(YTH domain-containing protein ECT4 OS=Arabidopsis thaliana OX=3702 GN=ECT4 PE=2 SV=1)
MsG0080047909.01	MsG0080047909.01		1392	0.965862	-0.0501109	0.919482	0.975884	no	down	0.976207	-0.0347417	0.942787	0.983254	no	down	1.00657	0.00944279	0.983241	0.999405	no	up	XP_003629925.2(probable serine/threonine-protein kinase PBL16 isoform X1 [Medicago truncatula])	GO:0004674(molecular_function:protein serine/threonine kinase activity); GO:0006468(biological_process:protein phosphorylation); GO:0005524(molecular_function:ATP binding); GO:0004672(molecular_function:protein kinase activity)				COG0515(T:Signal transduction mechanisms)	COG0515(Serine Threonine protein kinase)	PF07714.20(PK_Tyr_Ser-Thr:Protein tyrosine and serine/threonine kinase); PF00069.28(Pkinase:Protein kinase domain)	sp|Q9FM85|PBL16_ARATH(Probable serine/threonine-protein kinase PBL16 OS=Arabidopsis thaliana OX=3702 GN=PBL16 PE=1 SV=1)
MsG0080047910.01	MsG0080047910.01		1558	1.78528	0.836149	0.0155861	0.10497	no	up	2.21511	1.14738	0.000597826	0.00784093	yes	up	1.2366	0.306379	0.189443	0.939929	no	up	XP_003629926.1(protein MET1, chloroplastic [Medicago truncatula])	GO:0005515(molecular_function:protein binding)				ENOG410ZEH3(S:Function unknown)	ENOG410ZEH3(-)		sp|Q94BS2|MET1_ARATH(Protein MET1, chloroplastic OS=Arabidopsis thaliana OX=3702 GN=MET1 PE=1 SV=1)
MsG0080047911.01	MsG0080047911.01		2139	0.942944	-0.0847565	0.944797	0.983654	no	down	2.22977	1.15689	0.187677	0.468758	no	up	2.35761	1.23733	0.250383	0.968343	no	up	XP_024631394.1(putative pentatricopeptide repeat-containing protein At5g43820 [Medicago truncatula])	GO:0005515(molecular_function:protein binding)				ENOG410Z7Z7(S:Function unknown)	ENOG410Z7Z7(Pentatricopeptide repeat-containing protein)	PF13041.9(PPR_2:PPR repeat family); PF01535.23(PPR:PPR repeat); PF13812.9(PPR_3:Pentatricopeptide repeat domain); PF12854.10(PPR_1:PPR repeat); PF17177.7(PPR_long:Pentacotripeptide-repeat region of PRORP)	sp|P0C8R0|PP416_ARATH(Putative pentatricopeptide repeat-containing protein At5g43820 OS=Arabidopsis thaliana OX=3702 GN=At5g43820 PE=1 SV=1)
MsG0080047912.01	MsG0080047912.01		1955	0.710187	-0.493728	0.267873	0.57041	no	down	0.803636	-0.315386	0.50544	0.781196	no	down	1.12717	0.1727	0.678543	0.999405	no	up	RHN51852.1(putative transcription factor B3-Domain family [Medicago truncatula])	GO:0000723(biological_process:telomere maintenance); GO:0000014(molecular_function:single-stranded DNA endodeoxyribonuclease activity); GO:0007095(biological_process:mitotic G2 DNA damage checkpoint); GO:0051321(biological_process:meiotic cell cycle); GO:0006302(biological_process:double-strand break repair); GO:0000724(biological_process:double-strand break repair via homologous recombination); …	K10865	MRE11	map03450(Non-homologous end-joining); map03440(Homologous recombination)	COG0420(L:Replication, recombination and repair)	COG0420(Exonuclease)	PF03094.18(Mlo:Mlo family)
MsG0080047913.01	MsG0080047913.01		855	0.907058	-0.140733	0.739426	0.901851	no	down	1.16874	0.224949	0.616308	0.846567	no	up	1.28362	0.360221	0.250276	0.968343	no	up	GFY99860.1(mitochondrial substrate carrier family protein [Actinidia rufa])	GO:0016021(cellular_component:integral component of membrane); GO:0015711(biological_process:organic anion transport); GO:0071705(biological_process:nitrogen compound transport); GO:0022857(molecular_function:transmembrane transporter activity); GO:0015748(biological_process:organophosphate ester transport); GO:0055085(biological_process:transmembrane transport)	K15104	SLC25A11, OGC		ENOG410XQHU(S:Function unknown)	ENOG410XQHU(Mitochondrial)		sp|Q9C5M0|DTC_ARATH(Mitochondrial dicarboxylate/tricarboxylate transporter DTC OS=Arabidopsis thaliana OX=3702 GN=DTC PE=1 SV=1)
MsG0080047914.01	MsG0080047914.01		1212	1	0	1	1	no test	no test	1	0	1	1	no test	no test	1	0	1	1	no test	no test	RHN65241.1(putative F-box domain, leucine-rich repeat domain, L domain-containing protein [Medicago truncatula])	GO:0005515(molecular_function:protein binding)							sp|Q56YH2|FBD41_ARATH(FBD-associated F-box protein At5g18780 OS=Arabidopsis thaliana OX=3702 GN=At5g18780 PE=2 SV=2)
MsG0080047915.01	MsG0080047915.01		345	1	0	1	1	no test	no test	1	0	1	1	no test	no test	1	0	1	1	no test	no test	KEH33597.1(hypothetical protein MTR_3g448730 [Medicago truncatula])	GO:0052924(molecular_function:all-trans-nonaprenyl-diphosphate synthase (geranylgeranyl-diphosphate specific) activity); GO:0052923(molecular_function:all-trans-nonaprenyl-diphosphate synthase (geranyl-diphosphate specific) activity); GO:0015074(biological_process:DNA integration); GO:0008270(molecular_function:zinc ion binding); GO:0003676(molecular_function:nucleic acid binding); GO:0003964(mol…				COG2801(L:Replication, recombination and repair)	COG2801(Retrotransposon protein)		sp|P04146|COPIA_DROME(Copia protein OS=Drosophila melanogaster OX=7227 GN=GIP PE=1 SV=3)
MsG0080047916.01	MsG0080047916.01		654	2.14091	1.09822	0.787821	1	no	up	1	0	1	1	no test	no test	0.354222	-1.49727	0.713666	1	no	down	RHN77304.1(putative RNA-directed DNA polymerase [Medicago truncatula])	GO:0003964(molecular_function:RNA-directed DNA polymerase activity); GO:0015074(biological_process:DNA integration); GO:0008270(molecular_function:zinc ion binding); GO:0003676(molecular_function:nucleic acid binding); GO:0003899(molecular_function:DNA-directed RNA polymerase activity)				COG2801(L:Replication, recombination and repair)	COG2801(Retrotransposon protein)		sp|P04146|COPIA_DROME(Copia protein OS=Drosophila melanogaster OX=7227 GN=GIP PE=1 SV=3)
MsG0080047917.01	MsG0080047917.01		735	2.14091	1.09822	0.787821	1	no	up	2.80263	1.48678	0.712572	1	no	up	1.29681	0.374965	0.925987	1	no	up	RHN77304.1(putative RNA-directed DNA polymerase [Medicago truncatula])	GO:0003964(molecular_function:RNA-directed DNA polymerase activity); GO:0015074(biological_process:DNA integration); GO:0008270(molecular_function:zinc ion binding); GO:0003676(molecular_function:nucleic acid binding); GO:0003899(molecular_function:DNA-directed RNA polymerase activity)				COG2801(L:Replication, recombination and repair)	COG2801(Retrotransposon protein)		sp|Q94HW2|POLR1_ARATH(Retrovirus-related Pol polyprotein from transposon RE1 OS=Arabidopsis thaliana OX=3702 GN=RE1 PE=2 SV=1)
MsG0080047918.01	MsG0080047918.01		261	3.69689	1.88631	0.641233	1	no	up	1.48247	0.567999	0.889293	1	no	up	0.396925	-1.33306	0.741868	1	no	down
MsG0080047919.01	MsG0080047919.01		1839	1	0	1	1	no test	no test	6.7264	2.74984	0.487541	1	no	up	6.09271	2.60708	0.510422	1	no	up	KEH17438.1(hypothetical protein MTR_0015s0160 [Medicago truncatula])							PF20167.1(Transposase_32:Putative plant transposon protein)
MsG0080047920.01	MsG0080047920.01		654	0.564352	-0.825332	0.839711	1	no	down	1.42659	0.512573	0.898961	1	no	up	2.53485	1.3419	0.739525	1	no	up	RHN77304.1(putative RNA-directed DNA polymerase [Medicago truncatula])	GO:0003964(molecular_function:RNA-directed DNA polymerase activity); GO:0015074(biological_process:DNA integration); GO:0008270(molecular_function:zinc ion binding); GO:0003676(molecular_function:nucleic acid binding); GO:0003899(molecular_function:DNA-directed RNA polymerase activity)				COG2801(L:Replication, recombination and repair)	COG2801(Retrotransposon protein)		sp|P04146|COPIA_DROME(Copia protein OS=Drosophila melanogaster OX=7227 GN=GIP PE=1 SV=3)
MsG0080047921.01	MsG0080047921.01		414	1.28145	0.357781	0.922142	1	no	up	0.175783	-2.50813	0.532454	1	no	down	0.136304	-2.8751	0.472417	1	no	down	AES80922.1(hypothetical protein MTR_7g086540 [Medicago truncatula])	GO:0003964(molecular_function:RNA-directed DNA polymerase activity); GO:0015074(biological_process:DNA integration); GO:0008270(molecular_function:zinc ion binding); GO:0003676(molecular_function:nucleic acid binding)
MsG0080047922.01	MsG0080047922.01		300	1.0992	0.136449	0.973324	1	no	up	0.761136	-0.393773	0.923122	1	no	down	0.689922	-0.535494	0.895591	1	no	down	AES80922.1(hypothetical protein MTR_7g086540 [Medicago truncatula])	GO:0003964(molecular_function:RNA-directed DNA polymerase activity); GO:0015074(biological_process:DNA integration); GO:0008270(molecular_function:zinc ion binding); GO:0003676(molecular_function:nucleic acid binding)
MsG0080047923.01	MsG0080047923.01		1577	2.22836	1.15598	0.265416	0.567866	no	up	1.12968	0.175918	0.896405	0.967784	no	up	0.505423	-0.984438	0.399491	0.999405	no	down	XP_003598681.2(F-box/LRR-repeat protein At4g14096 [Medicago truncatula])	GO:0017001(biological_process:antibiotic catabolic process); GO:0008800(molecular_function:beta-lactamase activity); GO:0005515(molecular_function:protein binding)				ENOG4111BMA(S:Function unknown)	ENOG4111BMA(FBOX)	PF00646.36(F-box:F-box domain); PF12937.10(F-box-like:F-box-like)	sp|Q3E7K7|FB243_ARATH(F-box protein At4g22280 OS=Arabidopsis thaliana OX=3702 GN=At4g22280 PE=2 SV=1)
MsG0080047924.01	MsG0080047924.01		2158	1.72013	0.782521	0.127932	0.388576	no	up	1.22006	0.28695	0.598136	0.835945	no	up	0.706664	-0.500903	0.316424	0.984377	no	down	XP_013459202.1(cell number regulator 6 [Medicago truncatula])	GO:0005515(molecular_function:protein binding)				ENOG410XSVR(S:Function unknown)	ENOG410XSVR(cell number regulator 6-like)	PF00646.36(F-box:F-box domain)	sp|B6SGC5|CNR6_MAIZE(Cell number regulator 6 OS=Zea mays OX=4577 GN=CNR6 PE=2 SV=1)
MsG0080047925.01	MsG0080047925.01		1916	1.99736	0.998094	0.804924	1	no	up	0.761136	-0.393773	0.923122	1	no	down	0.382142	-1.38782	0.731338	1	no	down	XP_045830091.1(replication protein A 70 kDa DNA-binding subunit B-like [Trifolium pratense])	GO:0006310(biological_process:DNA recombination); GO:0051321(biological_process:meiotic cell cycle); GO:0000724(biological_process:double-strand break repair via homologous recombination); GO:0043047(molecular_function:single-stranded telomeric DNA binding); GO:0005634(cellular_component:nucleus); GO:0006281(biological_process:DNA repair); GO:0006289(biological_process:nucleotide-excision repair)…						PF02721.17(DUF223:Domain of unknown function DUF223); PF08646.13(Rep_fac-A_C:Replication factor-A C terminal domain)
MsG0080047926.01	MsG0080047926.01		882	1	0	1	1	no test	no test	1	0	1	1	no test	no test	1	0	1	1	no test	no test	XP_024635346.1(ATP-dependent DNA helicase PIF1-like [Medicago truncatula])	GO:0000723(biological_process:telomere maintenance); GO:0016787(molecular_function:hydrolase activity); GO:0006281(biological_process:DNA repair); GO:0032508(biological_process:DNA duplex unwinding); GO:0005657(cellular_component:replication fork); GO:0006260(biological_process:DNA replication); GO:0006310(biological_process:DNA recombination); GO:0016887(molecular_function:ATPase activity); GO:0…	K15255	PIF1				PF05970.17(PIF1:PIF1-like helicase)	sp|Q9H611|PIF1_HUMAN(ATP-dependent DNA helicase PIF1 OS=Homo sapiens OX=9606 GN=PIF1 PE=1 SV=2)
MsG0080047927.01	MsG0080047927.01		1809	1.36412	0.447968	0.232427	0.533461	no	up	1.1841	0.243792	0.543565	0.803405	no	up	0.866525	-0.206686	0.525061	0.999405	no	down	XP_003588470.1(rab GTPase-activating protein 22 [Medicago truncatula])	GO:0090630(biological_process:activation of GTPase activity); GO:0016021(cellular_component:integral component of membrane); GO:0005096(molecular_function:GTPase activator activity)				COG5210(S:Function unknown)	COG5210(TBC1 domain family member)	PF00566.21(RabGAP-TBC:Rab-GTPase-TBC domain); PF07734.16(FBA_1:F-box associated)	sp|Q94BY9|GAP22_ARATH(Rab GTPase-activating protein 22 OS=Arabidopsis thaliana OX=3702 GN=RABGAP22 PE=1 SV=1)
MsG0080047928.01	MsG0080047928.01		285	1	0	1	1	no test	no test	1	0	1	1	no test	no test	1	0	1	1	no test	no test	KEH33597.1(hypothetical protein MTR_3g448730 [Medicago truncatula])	GO:0052924(molecular_function:all-trans-nonaprenyl-diphosphate synthase (geranylgeranyl-diphosphate specific) activity); GO:0052923(molecular_function:all-trans-nonaprenyl-diphosphate synthase (geranyl-diphosphate specific) activity); GO:0015074(biological_process:DNA integration); GO:0008270(molecular_function:zinc ion binding); GO:0003676(molecular_function:nucleic acid binding); GO:0003964(mol…				COG2801(L:Replication, recombination and repair)	COG2801(Retrotransposon protein)		sp|P04146|COPIA_DROME(Copia protein OS=Drosophila melanogaster OX=7227 GN=GIP PE=1 SV=3)
MsG0080047929.01	MsG0080047929.01		1395	1	0	1	1	no test	no test	1	0	1	1	no test	no test	1	0	1	1	no test	no test	RHN45120.1(putative transcription factor interactor and regulator CCHC(Zn) family [Medicago truncatula])	GO:0003964(molecular_function:RNA-directed DNA polymerase activity); GO:0015074(biological_process:DNA integration); GO:0008270(molecular_function:zinc ion binding); GO:0003676(molecular_function:nucleic acid binding)	K00979	kdsB	map01250(Biosynthesis of nucleotide sugars)			PF14223.9(Retrotran_gag_2:gag-polypeptide of LTR copia-type); PF00098.26(zf-CCHC:Zinc knuckle); PF13696.9(zf-CCHC_2:Zinc knuckle)
MsG0080047930.01	MsG0080047930.01		1188	0.253619	-1.97926	0.622264	1	no	down	0.175783	-2.50813	0.532454	1	no	down	1	0	1	1	no test	no test	KEH26187.1(hypothetical protein MTR_6g046375 [Medicago truncatula])
MsG0080047931.01	MsG0080047931.01		282	1	0	1	1	no test	no test	1	0	1	1	no test	no test	1	0	1	1	no test	no test	ABE88103.1(Ribonuclease H [Medicago truncatula])	GO:0006310(biological_process:DNA recombination); GO:0005634(cellular_component:nucleus); GO:0004523(molecular_function:RNA-DNA hybrid ribonuclease activity); GO:0003887(molecular_function:DNA-directed DNA polymerase activity); GO:0015074(biological_process:DNA integration); GO:0004190(molecular_function:aspartic-type endopeptidase activity); GO:0003723(molecular_function:RNA binding); GO:0003676…
MsG0080047932.01	MsG0080047932.01		1020	1	0	1	1	no test	no test	5.52815	2.4668	0.471762	1	no	up	5.0194	2.32752	0.501468	1	no	up	XP_039687844.1(uncharacterized protein LOC120579506 [Medicago truncatula])	GO:0003676(molecular_function:nucleic acid binding)
MsG0080047933.01	MsG0080047933.01		2298	1.21795	0.284453	0.512184	0.77813	no	up	1.57783	0.657944	0.108076	0.338139	no	up	1.28869	0.365905	0.180047	0.937622	no	up	XP_013444542.1(two-component response regulator-like APRR5 [Medicago truncatula])	GO:0009736(biological_process:cytokinin-activated signaling pathway); GO:0000160(biological_process:phosphorelay signal transduction system); GO:0005634(cellular_component:nucleus); GO:0016301(molecular_function:kinase activity); GO:0048511(biological_process:rhythmic process); GO:0005515(molecular_function:protein binding); GO:0016310(biological_process:phosphorylation)	K12130	PRR5	map04712(Circadian rhythm - plant)	COG5641(K:Transcription)	COG5641(Transcription factor)	PF00072.27(Response_reg:Response regulator receiver domain); PF06203.17(CCT:CCT motif)	sp|Q6LA42|APRR5_ARATH(Two-component response regulator-like APRR5 OS=Arabidopsis thaliana OX=3702 GN=APRR5 PE=1 SV=2)
MsG0080047934.01	MsG0080047934.01		483	6.1219	2.61398	0.352091	1	no	up	2.88094	1.52654	0.698332	1	no	up	0.468105	-1.0951	0.669362	1	no	down	XP_013444541.1(NDR1/HIN1-like protein 26 [Medicago truncatula])	GO:0046658(cellular_component:anchored component of plasma membrane); GO:0016021(cellular_component:integral component of membrane); GO:0098542(biological_process:defense response to other organism); GO:0009506(cellular_component:plasmodesma)				ENOG410YH2V(S:Function unknown)	ENOG410YH2V(Late embryogenesis abundant protein)	PF03168.16(LEA_2:Late embryogenesis abundant protein)	sp|Q9FI03|NHL26_ARATH(NDR1/HIN1-like protein 26 OS=Arabidopsis thaliana OX=3702 GN=NHL26 PE=2 SV=1)
MsG0080047935.01	MsG0080047935.01		789	0.827842	-0.272573	0.734683	0.899449	no	down	0.647992	-0.625951	0.438469	0.728191	no	down	0.782223	-0.354349	0.654888	0.999405	no	down	KEH40307.1(stress-induced receptor-like kinase [Medicago truncatula])	GO:0006468(biological_process:protein phosphorylation); GO:0008889(molecular_function:glycerophosphodiester phosphodiesterase activity); GO:0016021(cellular_component:integral component of membrane); GO:0016020(cellular_component:membrane); GO:0030247(molecular_function:polysaccharide binding); GO:0004674(molecular_function:protein serine/threonine kinase activity); GO:0004672(molecular_function:…				COG0515(T:Signal transduction mechanisms)	COG0515(Serine Threonine protein kinase)	PF00069.28(Pkinase:Protein kinase domain); PF07714.20(PK_Tyr_Ser-Thr:Protein tyrosine and serine/threonine kinase)	sp|Q9FF29|PR5K_ARATH(PR5-like receptor kinase OS=Arabidopsis thaliana OX=3702 GN=PR5K PE=1 SV=1)
MsG0080047936.01	MsG0080047936.01		2919	1.54385	0.626537	0.225511	0.526374	no	up	0.934487	-0.097753	0.888685	0.965418	no	down	0.605965	-0.722694	0.220405	0.958766	no	down	KEH33747.1(transmembrane protein, putative [Medicago truncatula])	GO:0016021(cellular_component:integral component of membrane); GO:0008270(molecular_function:zinc ion binding); GO:0003676(molecular_function:nucleic acid binding)						PF14392.9(zf-CCHC_4:Zinc knuckle); PF03372.26(Exo_endo_phos:Endonuclease/Exonuclease/phosphatase family); PF14111.9(DUF4283:Domain of unknown function (DUF4283))
MsG0080047937.01	MsG0080047937.01		516	0.581484	-0.782188	0.767095	1	no	down	0.402502	-1.31293	0.622003	1	no	down	0.694606	-0.525732	0.881384	1	no	down	KEH16839.1(hypothetical protein MTR_0083s0070 [Medicago truncatula])
MsG0080047938.01	MsG0080047938.01		2049	0.24495	-2.02944	0.571943	1	no	down	0.472323	-1.08215	0.699664	1	no	down	1.90431	0.929268	0.787849	1	no	up	XP_039689484.1(rust resistance kinase Lr10-like [Medicago truncatula])	GO:0006468(biological_process:protein phosphorylation); GO:0008889(molecular_function:glycerophosphodiester phosphodiesterase activity); GO:0016021(cellular_component:integral component of membrane); GO:0030247(molecular_function:polysaccharide binding); GO:0004672(molecular_function:protein kinase activity); GO:0005524(molecular_function:ATP binding); GO:0106310(deleted:old GO)				COG0515(T:Signal transduction mechanisms)	COG0515(Serine Threonine protein kinase)	PF07714.20(PK_Tyr_Ser-Thr:Protein tyrosine and serine/threonine kinase); PF00069.28(Pkinase:Protein kinase domain); PF13947.9(GUB_WAK_bind:Wall-associated receptor kinase galacturonan-binding)	sp|P93604|LRK10_WHEAT(Rust resistance kinase Lr10 OS=Triticum aestivum OX=4565 GN=LRK10 PE=2 SV=1)
MsG0080047939.01	MsG0080047939.01		573	0.542187	-0.883137	0.182751	0.473115	no	down	0.610266	-0.712489	0.208607	0.497939	no	down	1.12158	0.165533	0.811437	0.999405	no	up	XP_013466260.1(vesicle transport protein SFT2B [Medicago truncatula])	GO:0015031(biological_process:protein transport); GO:0016021(cellular_component:integral component of membrane); GO:0016192(biological_process:vesicle-mediated transport)				COG5102(U:Intracellular trafficking, secretion, and vesicular transport)	COG5102(SFT2 domain containing)	PF04178.15(Got1:Got1/Sft2-like family)	sp|O95562|SFT2B_HUMAN(Vesicle transport protein SFT2B OS=Homo sapiens OX=9606 GN=SFT2D2 PE=1 SV=1)
MsG0080047940.01	MsG0080047940.01		2505	1.0019	0.00273776	0.994861	0.999036	no	up	1.00937	0.0134536	0.974412	0.993331	no	up	1.00489	0.00704419	0.985409	0.999405	no	up	XP_013466255.2(transcription factor MYB3R-1 [Medicago truncatula])	GO:0006396(biological_process:RNA processing); GO:0005634(cellular_component:nucleus); GO:1990904(cellular_component:ribonucleoprotein complex); GO:0006355(biological_process:regulation of transcription, DNA-templated); GO:0003723(molecular_function:RNA binding); GO:0003677(molecular_function:DNA binding); GO:0008168(molecular_function:methyltransferase activity); GO:0000978(molecular_function:RN…	K09420	MYB, C-MYB		COG5147(K:Transcription)	COG5147(Myblike DNAbinding domain containing protein)	PF00249.34(Myb_DNA-binding:Myb-like DNA-binding domain); PF13921.9(Myb_DNA-bind_6:Myb-like DNA-binding domain)	sp|Q9S7G7|MB3R1_ARATH(Transcription factor MYB3R-1 OS=Arabidopsis thaliana OX=3702 GN=MYB3R1 PE=2 SV=1)
MsG0080047941.01	MsG0080047941.01		2526	1.34073	0.423019	0.460325	0.744517	no	up	1.46066	0.546619	0.530587	0.796269	no	up	1.0825	0.11437	0.882719	0.999405	no	up	KEH40296.1(transcription repressor MYB5 [Medicago truncatula])	GO:0006355(biological_process:regulation of transcription, DNA-templated); GO:0005634(cellular_component:nucleus); GO:0003824(molecular_function:catalytic activity); GO:0008152(biological_process:metabolic process); GO:0000978(molecular_function:RNA polymerase II core promoter proximal region sequence-specific DNA binding); GO:0000981(molecular_function:RNA polymerase II transcription factor acti…	K09420	MYB, C-MYB		COG5147(K:Transcription)	COG5147(Myblike DNAbinding domain containing protein)		sp|Q94FL9|MB3R4_ARATH(Transcription factor MYB3R-4 OS=Arabidopsis thaliana OX=3702 GN=MYB3R4 PE=1 SV=1)
MsG0080047942.01	MsG0080047942.01		1110	0.655655	-0.608991	0.504144	0.774396	no	down	0.464854	-1.10515	0.213973	0.505655	no	down	0.70782	-0.498545	0.624689	0.999405	no	down	XP_013466253.1(F-box protein SKIP23 [Medicago truncatula])							PF03478.21(DUF295:Protein of unknown function (DUF295))	sp|Q3EBZ2|SKI23_ARATH(F-box protein SKIP23 OS=Arabidopsis thaliana OX=3702 GN=SKIP23 PE=1 SV=1)
MsG0080047943.01	MsG0080047943.01		2218	1.04517	0.0637428	0.840007	0.942976	no	up	0.84851	-0.236996	0.524228	0.792936	no	down	0.810399	-0.303296	0.345136	0.988329	no	down	XP_013466252.1(TOM1-like protein 9 [Medicago truncatula])	GO:0035091(molecular_function:phosphatidylinositol binding); GO:0006886(biological_process:intracellular protein transport); GO:0016020(cellular_component:membrane); GO:0005622(cellular_component:intracellular); GO:0043130(molecular_function:ubiquitin binding); GO:0043328(biological_process:protein targeting to vacuole involved in ubiquitin-dependent protein catabolic process via the multivesicul…				ENOG410Y26G(S:Function unknown)	ENOG410Y26G(gamma adaptin ear containing, arf binding protein)	PF03127.17(GAT:GAT domain)	sp|Q8L860|TOL9_ARATH(TOM1-like protein 9 OS=Arabidopsis thaliana OX=3702 GN=TOL9 PE=1 SV=1)
MsG0080047944.01	MsG0080047944.01		519	0.845755	-0.241688	0.600902	0.830372	no	down	0.977918	-0.0322151	0.945107	0.983932	no	down	1.15212	0.204293	0.560623	0.999405	no	up	XP_013466251.1(DEAD-box ATP-dependent RNA helicase 35 [Medicago truncatula])	GO:0016787(molecular_function:hydrolase activity); GO:0000398(biological_process:mRNA splicing, via spliceosome); GO:0005524(molecular_function:ATP binding); GO:0003724(molecular_function:RNA helicase activity); GO:0003723(molecular_function:RNA binding); GO:0003676(molecular_function:nucleic acid binding); GO:0004386(molecular_function:helicase activity); GO:0005681(cellular_component:spliceosom…	K13116	DDX41, ABS		ENOG410XQQC(L:Replication, recombination and repair)	ENOG410XQQC(DEAD (Asp-Glu-Ala-Asp) box polypeptide 41)	PF00271.34(Helicase_C:Helicase conserved C-terminal domain)	sp|Q9LU46|RH35_ARATH(DEAD-box ATP-dependent RNA helicase 35 OS=Arabidopsis thaliana OX=3702 GN=RH35 PE=2 SV=1)
MsG0080047945.01	MsG0080047945.01		246	0.660927	-0.597438	0.739937	1	no	down	1.44416	0.530231	0.742579	1	no	up	2.19159	1.13198	0.523557	1	no	up	Q9ZT05.1(RecName: Full=Photosystem I reaction center subunit psaK, chloroplastic; AltName: Full=PSI-K; AltName: Full=Photosystem I subunit X; Flags: Precursor [Medicago sativa])	GO:0009535(cellular_component:chloroplast thylakoid membrane); GO:0016168(molecular_function:chlorophyll binding); GO:0009522(cellular_component:photosystem I); GO:0016021(cellular_component:integral component of membrane); GO:0016020(cellular_component:membrane); GO:0009507(cellular_component:chloroplast); GO:0015979(biological_process:photosynthesis); GO:0016491(molecular_function:oxidoreductas…	K02698	psaK	map00195(Photosynthesis)	ENOG4111RY5(S:Function unknown)	ENOG4111RY5(Photosystem I reaction center subunit)	PF01241.21(PSI_PSAK:Photosystem I psaG / psaK)	sp|Q9ZT05|PSAK_MEDSA(Photosystem I reaction center subunit psaK, chloroplastic OS=Medicago sativa OX=3879 GN=PSAK PE=2 SV=1)
MsG0080047946.01	MsG0080047946.01		393	0.263608	-1.92353	0.446919	1	no	down	2.22632	1.15466	0.393251	0.690888	no	up	8.22704	3.04037	0.0811497	1	no	up	KEH40290.1(photosystem I reaction center subunit X psaK [Medicago truncatula])	GO:0016168(molecular_function:chlorophyll binding); GO:0009522(cellular_component:photosystem I); GO:0016021(cellular_component:integral component of membrane); GO:0009507(cellular_component:chloroplast); GO:0015979(biological_process:photosynthesis); GO:0016491(molecular_function:oxidoreductase activity)	K02698	psaK	map00195(Photosynthesis)	ENOG4111RY5(S:Function unknown)	ENOG4111RY5(Photosystem I reaction center subunit)		sp|Q9ZT05|PSAK_MEDSA(Photosystem I reaction center subunit psaK, chloroplastic OS=Medicago sativa OX=3879 GN=PSAK PE=2 SV=1)
MsG0080047947.01	MsG0080047947.01		210	1	0	1	1	no test	no test	1	0	1	1	no test	no test	1	0	1	1	no test	no test	RHN77703.1(putative proton-dependent oligopeptide transporter family, major facilitator superfamily [Medicago truncatula])	GO:0006857(biological_process:oligopeptide transport); GO:0016021(cellular_component:integral component of membrane); GO:0016020(cellular_component:membrane); GO:0022857(molecular_function:transmembrane transporter activity); GO:0005886(cellular_component:plasma membrane); GO:0055085(biological_process:transmembrane transport)	K14638	SLC15A3_4, PHT		COG3104(E:Amino acid transport and metabolism)	COG3104(transporter)	PF00854.24(PTR2:POT family)	sp|Q9M817|PTR6_ARATH(Protein NRT1/ PTR FAMILY 1.2 OS=Arabidopsis thaliana OX=3702 GN=NPF1.2 PE=1 SV=1)
MsG0080047948.01	MsG0080047948.01		1269	1.43202	0.518047	0.406433	0.701608	no	up	1.07376	0.102665	0.866259	0.959086	no	up	0.744894	-0.424893	0.478442	0.999405	no	down	KEH40281.1(peptide/nitrate transporter plant [Medicago truncatula])	GO:0006857(biological_process:oligopeptide transport); GO:0016021(cellular_component:integral component of membrane); GO:0016020(cellular_component:membrane); GO:0022857(molecular_function:transmembrane transporter activity); GO:0005886(cellular_component:plasma membrane); GO:0055085(biological_process:transmembrane transport)	K14638	SLC15A3_4, PHT		COG3104(E:Amino acid transport and metabolism)	COG3104(transporter)	PF00854.24(PTR2:POT family)	sp|Q9M817|PTR6_ARATH(Protein NRT1/ PTR FAMILY 1.2 OS=Arabidopsis thaliana OX=3702 GN=NPF1.2 PE=1 SV=1)
MsG0080047949.01	MsG0080047949.01		318	0.605411	-0.724013	0.624121	1	no	down	0.651616	-0.617906	0.585376	0.82876	no	down	1.07123	0.0992742	0.945945	1	no	up	XP_039689447.1(uncharacterized protein LOC25482244 [Medicago truncatula])
MsG0080047950.01	MsG0080047950.01		1404	1.0696	0.0970654	0.884945	0.962961	no	up	0.828839	-0.270837	0.718149	0.897892	no	down	0.771451	-0.374354	0.521159	0.999405	no	down	RHN77703.1(putative proton-dependent oligopeptide transporter family, major facilitator superfamily [Medicago truncatula])	GO:0006857(biological_process:oligopeptide transport); GO:0016021(cellular_component:integral component of membrane); GO:0016020(cellular_component:membrane); GO:0022857(molecular_function:transmembrane transporter activity); GO:0005886(cellular_component:plasma membrane); GO:0055085(biological_process:transmembrane transport)	K14638	SLC15A3_4, PHT		COG3104(E:Amino acid transport and metabolism)	COG3104(transporter)	PF00854.24(PTR2:POT family)	sp|Q8LPL2|PTR32_ARATH(Protein NRT1/ PTR FAMILY 1.1 OS=Arabidopsis thaliana OX=3702 GN=NPF1.1 PE=1 SV=2)
MsG0080047951.01	MsG0080047951.01		354	1.90648	0.93091	0.68327	1	no	up	0.156676	-2.67414	0.504415	1	no	down	0.0805461	-3.63404	0.286917	1	no	down	KEH29567.1(hypothetical protein MTR_4g045723 [Medicago truncatula])	GO:0015074(biological_process:DNA integration); GO:0030430(cellular_component:host cell cytoplasm); GO:0004523(molecular_function:RNA-DNA hybrid ribonuclease activity); GO:0003676(molecular_function:nucleic acid binding)
MsG0080047952.01	MsG0080047952.01		234	1	0	1	1	no	no change	1	0	1	1	no test	no test	1	0	1	1	no	no change	RHN66585.1(hypothetical protein MtrunA17_Chr3g0092751 [Medicago truncatula])
MsG0080047953.01	MsG0080047953.01		408	1	0	1	1	no test	no test	1.48247	0.567999	0.889293	1	no	up	1.34376	0.426279	0.916798	1	no	up	AES87751.1(hypothetical protein MTR_4g033680 [Medicago truncatula])							PF00170.24(bZIP_1:bZIP transcription factor)
MsG0080047954.01	MsG0080047954.01		1839	0.927767	-0.108165	0.800918	0.927601	no	down	1.33773	0.41979	0.324638	0.632034	no	up	1.43421	0.520258	0.184401	0.93841	no	up	KEH40287.1(hypothetical protein MTR_1g026810 [Medicago truncatula])					ENOG410YUAK(S:Function unknown)	ENOG410YUAK(-)
MsG0080047955.01	MsG0080047955.01		879	1.7745	0.827413	0.0757901	0.286706	no	up	2.59383	1.37508	0.0041229	0.034434	yes	up	1.4553	0.541317	0.0719474	0.799733	no	up	XP_013466249.1(photosystem I reaction center subunit psaK, chloroplastic [Medicago truncatula])	GO:0009535(cellular_component:chloroplast thylakoid membrane); GO:0016168(molecular_function:chlorophyll binding); GO:0009522(cellular_component:photosystem I); GO:0016021(cellular_component:integral component of membrane); GO:0016020(cellular_component:membrane); GO:0016491(molecular_function:oxidoreductase activity); GO:0015979(biological_process:photosynthesis); GO:0009507(cellular_component:c…	K02698	psaK	map00195(Photosynthesis)	ENOG4111RY5(S:Function unknown)	ENOG4111RY5(Photosystem I reaction center subunit)	PF01241.21(PSI_PSAK:Photosystem I psaG / psaK)	sp|Q9ZT05|PSAK_MEDSA(Photosystem I reaction center subunit psaK, chloroplastic OS=Medicago sativa OX=3879 GN=PSAK PE=2 SV=1)
MsG0080047956.01	MsG0080047956.01		156	1.00478	0.00687808	0.996056	0.999212	no	up	1.65244	0.724599	0.467041	0.750864	no	up	1.65005	0.722506	0.517464	0.999405	no	up	KEH40290.1(photosystem I reaction center subunit X psaK [Medicago truncatula])	GO:0016168(molecular_function:chlorophyll binding); GO:0009522(cellular_component:photosystem I); GO:0016021(cellular_component:integral component of membrane); GO:0016020(cellular_component:membrane); GO:0016491(molecular_function:oxidoreductase activity); GO:0015979(biological_process:photosynthesis); GO:0009507(cellular_component:chloroplast)	K02698	psaK	map00195(Photosynthesis)	ENOG4111RY5(S:Function unknown)	ENOG4111RY5(Photosystem I reaction center subunit)	PF01241.21(PSI_PSAK:Photosystem I psaG / psaK)	sp|Q9SUI5|PSAK_ARATH(Photosystem I reaction center subunit psaK, chloroplastic OS=Arabidopsis thaliana OX=3702 GN=PSAK PE=1 SV=2)
MsG0080047957.01	MsG0080047957.01		867	2.14091	1.09822	0.787821	1	no	up	1.48247	0.567999	0.889293	1	no	up	0.689922	-0.535494	0.895591	1	no	down	XP_013466251.1(DEAD-box ATP-dependent RNA helicase 35 [Medicago truncatula])	GO:0016787(molecular_function:hydrolase activity); GO:0000398(biological_process:mRNA splicing, via spliceosome); GO:0003724(molecular_function:RNA helicase activity); GO:0003723(molecular_function:RNA binding); GO:0003676(molecular_function:nucleic acid binding); GO:0005681(cellular_component:spliceosomal complex); GO:0005524(molecular_function:ATP binding); GO:0008270(molecular_function:zinc io…	K13116	DDX41, ABS		ENOG410XQQC(L:Replication, recombination and repair)	ENOG410XQQC(DEAD (Asp-Glu-Ala-Asp) box polypeptide 41)	PF00270.32(DEAD:DEAD/DEAH box helicase); PF00271.34(Helicase_C:Helicase conserved C-terminal domain)	sp|Q9LU46|RH35_ARATH(DEAD-box ATP-dependent RNA helicase 35 OS=Arabidopsis thaliana OX=3702 GN=RH35 PE=2 SV=1)
MsG0080047958.01	MsG0080047958.01		312	1.04692	0.0661472	0.978191	1	no	up	0.653726	-0.613243	0.767349	1	no	down	0.625001	-0.678069	0.772074	1	no	down	QHO44078.1(DEAD-box ATP-dependent RNA helicase [Arachis hypogaea])	GO:0016787(molecular_function:hydrolase activity); GO:0016021(cellular_component:integral component of membrane); GO:0000398(biological_process:mRNA splicing, via spliceosome); GO:0004386(molecular_function:helicase activity); GO:0003724(molecular_function:RNA helicase activity); GO:0003723(molecular_function:RNA binding); GO:0003676(molecular_function:nucleic acid binding); GO:0005681(cellular_c…	K13116	DDX41, ABS		ENOG410XQQC(L:Replication, recombination and repair)	ENOG410XQQC(DEAD (Asp-Glu-Ala-Asp) box polypeptide 41)	PF00270.32(DEAD:DEAD/DEAH box helicase)	sp|Q5Z6G5|RH35B_ORYSJ(DEAD-box ATP-dependent RNA helicase 35B OS=Oryza sativa subsp. japonica OX=39947 GN=Os06g0697200 PE=3 SV=1)
MsG0080047959.01	MsG0080047959.01		357	0.750722	-0.41365	0.815224	1	no	down	1.47772	0.56337	0.691886	0.886157	no	up	1.95409	0.966494	0.49814	1	no	up	XP_013466251.1(DEAD-box ATP-dependent RNA helicase 35 [Medicago truncatula])	GO:0016787(molecular_function:hydrolase activity); GO:0000398(biological_process:mRNA splicing, via spliceosome); GO:0005524(molecular_function:ATP binding); GO:0003724(molecular_function:RNA helicase activity); GO:0003723(molecular_function:RNA binding); GO:0003676(molecular_function:nucleic acid binding); GO:0004386(molecular_function:helicase activity); GO:0005681(cellular_component:spliceosom…	K13116	DDX41, ABS		ENOG410XQQC(L:Replication, recombination and repair)	ENOG410XQQC(DEAD (Asp-Glu-Ala-Asp) box polypeptide 41)		sp|Q9LU46|RH35_ARATH(DEAD-box ATP-dependent RNA helicase 35 OS=Arabidopsis thaliana OX=3702 GN=RH35 PE=2 SV=1)
MsG0080047960.01	MsG0080047960.01		1074	0.726399	-0.461165	0.392277	0.690518	no	down	1.02606	0.03711	0.937874	0.982084	no	up	1.4099	0.49559	0.279119	0.976999	no	up	XP_013466252.1(TOM1-like protein 9 [Medicago truncatula])	GO:0035091(molecular_function:phosphatidylinositol binding); GO:0016020(cellular_component:membrane); GO:0043130(molecular_function:ubiquitin binding); GO:0043328(biological_process:protein targeting to vacuole involved in ubiquitin-dependent protein catabolic process via the multivesicular body sorting pathway)				ENOG410Y26G(S:Function unknown)	ENOG410Y26G(gamma adaptin ear containing, arf binding protein)		sp|Q8L860|TOL9_ARATH(TOM1-like protein 9 OS=Arabidopsis thaliana OX=3702 GN=TOL9 PE=1 SV=1)
MsG0080047961.01	MsG0080047961.01		666	1	0	1	1	no test	no test	1	0	1	1	no test	no test	1	0	1	1	no test	no test	XP_013466254.1(D-amino-acid transaminase, chloroplastic [Medicago truncatula])	GO:0008696(molecular_function:4-amino-4-deoxychorismate lyase activity); GO:0003824(molecular_function:catalytic activity); GO:0016021(cellular_component:integral component of membrane); GO:0019752(biological_process:carboxylic acid metabolic process); GO:0008483(molecular_function:transaminase activity); GO:0008152(biological_process:metabolic process)	K18482	ADCL	map00790(Folate biosynthesis); map01240(Biosynthesis of cofactors)	COG0115(E:Amino acid transport and metabolism)	COG0115(brancheD-chain amino acid aminotransferase)	PF01063.22(Aminotran_4:Amino-transferase class IV)	sp|Q8L493|DAAA_ARATH(D-amino-acid transaminase, chloroplastic OS=Arabidopsis thaliana OX=3702 GN=DAAT PE=1 SV=1)
MsG0080047962.01	MsG0080047962.01		3417	1.25784	0.330945	0.529881	0.788944	no	up	1.6369	0.710963	0.0695155	0.254175	no	up	1.29326	0.37101	0.43608	0.999405	no	up	XP_013466255.2(transcription factor MYB3R-1 [Medicago truncatula])	GO:0006396(biological_process:RNA processing); GO:0005634(cellular_component:nucleus); GO:1990904(cellular_component:ribonucleoprotein complex); GO:0006355(biological_process:regulation of transcription, DNA-templated); GO:0003723(molecular_function:RNA binding); GO:0003676(molecular_function:nucleic acid binding); GO:0003677(molecular_function:DNA binding); GO:0008168(molecular_function:methyltr…	K09420	MYB, C-MYB		COG5147(K:Transcription)	COG5147(Myblike DNAbinding domain containing protein)	PF00249.34(Myb_DNA-binding:Myb-like DNA-binding domain); PF13921.9(Myb_DNA-bind_6:Myb-like DNA-binding domain); PF08777.14(RRM_3:RNA binding motif); PF05383.20(La:La domain)	sp|Q9S7G7|MB3R1_ARATH(Transcription factor MYB3R-1 OS=Arabidopsis thaliana OX=3702 GN=MYB3R1 PE=2 SV=1)
MsG0080047963.01	MsG0080047963.01		870	1.12179	0.165808	0.700865	0.884253	no	up	1.12468	0.169514	0.720574	0.899023	no	up	0.999123	-0.00126518	0.997981	0.999723	no	down	KEH40299.1(sulfite exporter TauE/SafE family protein [Medicago truncatula])	GO:0016567(biological_process:protein ubiquitination); GO:0016021(cellular_component:integral component of membrane); GO:0031464(cellular_component:Cul4A-RING E3 ubiquitin ligase complex)				ENOG4111ME2(S:Function unknown); ENOG4111QQH(S:Function unknown)	ENOG4111ME2(Sulfite exporter TauE/SafE); ENOG4111QQH(Sulfite exporter TauE/SafE)	PF01925.22(TauE:Sulfite exporter TauE/SafE)	sp|Q8L7A0|TAUE3_ARATH(Sulfite exporter TauE/SafE family protein 3 OS=Arabidopsis thaliana OX=3702 GN=At2g25737 PE=2 SV=1)
MsG0080047964.01	MsG0080047964.01		531	1	0	1	1	no test	no test	1.48247	0.567999	0.889293	1	no	up	1.34376	0.426279	0.916798	1	no	up	XP_013466260.1(vesicle transport protein SFT2B [Medicago truncatula])	GO:0015031(biological_process:protein transport); GO:0016021(cellular_component:integral component of membrane); GO:0016192(biological_process:vesicle-mediated transport)				COG5102(U:Intracellular trafficking, secretion, and vesicular transport)	COG5102(SFT2 domain containing)	PF04178.15(Got1:Got1/Sft2-like family)
MsG0080047965.01	MsG0080047965.01		735	0.640792	-0.642073	0.860612	1	no	down	1.2188	0.285461	0.907836	1	no	up	1.92595	0.945569	0.750982	1	no	up	XP_039689484.1(rust resistance kinase Lr10-like [Medicago truncatula])	GO:0006468(biological_process:protein phosphorylation); GO:0030247(molecular_function:polysaccharide binding); GO:0016021(cellular_component:integral component of membrane); GO:0005524(molecular_function:ATP binding); GO:0004672(molecular_function:protein kinase activity)				COG0515(T:Signal transduction mechanisms)	COG0515(Serine Threonine protein kinase)	PF07714.20(PK_Tyr_Ser-Thr:Protein tyrosine and serine/threonine kinase); PF00069.28(Pkinase:Protein kinase domain)	sp|P93604|LRK10_WHEAT(Rust resistance kinase Lr10 OS=Triticum aestivum OX=4565 GN=LRK10 PE=2 SV=1)
MsG0080047966.01	MsG0080047966.01		333	0.916024	-0.126543	0.956349	1	no	down	1.62516	0.700582	0.72145	1	no	up	1.74102	0.799929	0.604591	1	no	up	XP_013466486.1(uncharacterized protein LOC25482468 [Medicago truncatula])					ENOG4112BZ0(S:Function unknown)	ENOG4112BZ0(-)	PF17032.8(zinc_ribbon_15:zinc-ribbon family); PF12773.10(DZR:Double zinc ribbon); PF13248.9(zf-ribbon_3:zinc-ribbon domain); PF13240.9(zinc_ribbon_2:zinc-ribbon domain)
MsG0080047967.01	MsG0080047967.01		1816	2.12726	1.089	0.00245091	0.0286357	yes	up	1.68997	0.757	0.0115832	0.072948	no	up	0.792008	-0.336413	0.232676	0.962055	no	down	XP_003589598.2(chlorophyllide a oxygenase, chloroplastic [Medicago truncatula])	GO:0005737(cellular_component:cytoplasm); GO:0016705(molecular_function:oxidoreductase activity, acting on paired donors, with incorporation or reduction of molecular oxygen); GO:0010277(molecular_function:chlorophyllide a oxygenase [overall] activity); GO:0015995(biological_process:chlorophyll biosynthetic process); GO:0051537(molecular_function:2 iron, 2 sulfur cluster binding); GO:0005506(mole…	K13600	CAO	map00860(Porphyrin metabolism)	COG4638(P:Inorganic ion transport and metabolism)	COG4638(rieske 2fe-2S domain-containing protein)	PF00355.29(Rieske:Rieske [2Fe-2S] domain); PF19112.3(VanA_C:Vanillate O-demethylase oxygenase C-terminal domain)	sp|Q9MBA1|CAO_ARATH(Chlorophyllide a oxygenase, chloroplastic OS=Arabidopsis thaliana OX=3702 GN=CAO PE=1 SV=1)
MsG0080047968.01	MsG0080047968.01		2765	1.1558	0.20889	0.736354	0.899845	no	up	1.64193	0.715394	0.232224	0.528912	no	up	1.414	0.499779	0.128417	0.900731	no	up	XP_013466487.1(filament-like plant protein isoform X2 [Medicago truncatula])					ENOG410YAAZ(S:Function unknown)	ENOG410YAAZ(filament-like plant protein)	PF05911.14(FPP:Filament-like plant protein, long coiled-coil); PF08614.14(ATG16:Autophagy protein 16 (ATG16)); PF19220.3(Crescentin:Crescentin protein)	sp|Q8LLE5|FPP_SOLLC(Filament-like plant protein (Fragment) OS=Solanum lycopersicum OX=4081 GN=FPP PE=1 SV=1)
MsG0080047969.01	MsG0080047969.01		549	1.24528	0.316466	0.39511	0.692628	no	up	0.924065	-0.113934	0.776359	0.923108	no	down	0.739478	-0.435421	0.153099	0.924155	no	down	KEH40724.1(tobamovirus multiplication-like protein [Medicago truncatula])	GO:0016021(cellular_component:integral component of membrane)				ENOG41110A4(S:Function unknown)	ENOG41110A4(tobamovirus multiplication)	PF06454.14(THH1_TOM1-3_dom:THH1/TOM1/TOM3 domain)	sp|Q9ZUM2|TOM3_ARATH(Tobamovirus multiplication protein 3 OS=Arabidopsis thaliana OX=3702 GN=TOM3 PE=1 SV=2)
MsG0080047970.01	MsG0080047970.01		1350	1.05015	0.0706002	0.807612	0.930297	no	up	1.02162	0.0308624	0.91953	0.976542	no	up	0.970038	-0.0438864	0.864435	0.999405	no	down	XP_013466685.1(pentatricopeptide repeat-containing protein At5g13770, chloroplastic [Medicago truncatula])	GO:0009658(biological_process:chloroplast organization); GO:0005515(molecular_function:protein binding); GO:0003729(molecular_function:mRNA binding)				ENOG410Z7Z7(S:Function unknown)	ENOG410Z7Z7(Pentatricopeptide repeat-containing protein)	PF06454.14(THH1_TOM1-3_dom:THH1/TOM1/TOM3 domain); PF01535.23(PPR:PPR repeat)	sp|Q66GP4|PP379_ARATH(Pentatricopeptide repeat-containing protein At5g13770, chloroplastic OS=Arabidopsis thaliana OX=3702 GN=At5g13770 PE=2 SV=1)
MsG0080047971.01	MsG0080047971.01		1815	0.75502	-0.405414	0.310242	0.617036	no	down	1.09631	0.132657	0.750716	0.911936	no	up	1.44732	0.533387	0.136746	0.904924	no	up	XP_003594529.1(probable ADP-ribosylation factor GTPase-activating protein AGD13 [Medicago truncatula])	GO:0005543(molecular_function:phospholipid binding); GO:0005096(molecular_function:GTPase activator activity)	K12486	SMAP	map04144(Endocytosis)	COG5347(U:Intracellular trafficking, secretion, and vesicular transport)	COG5347(domain, ankyrin repeat and PH domain)	PF02721.17(DUF223:Domain of unknown function DUF223)	sp|Q8LFN9|AGD13_ARATH(Probable ADP-ribosylation factor GTPase-activating protein AGD13 OS=Arabidopsis thaliana OX=3702 GN=AGD13 PE=2 SV=1)
MsG0080047972.01	MsG0080047972.01		1653	0.545781	-0.873605	0.802137	1	no	down	1.77693	0.829386	0.709784	1	no	up	3.18004	1.66904	0.526752	1	no	up	XP_013468241.1(F-box/FBD/LRR-repeat protein At5g56420 [Medicago truncatula])	GO:0016021(cellular_component:integral component of membrane); GO:0005515(molecular_function:protein binding)						PF08387.13(FBD:FBD); PF00646.36(F-box:F-box domain); PF12937.10(F-box-like:F-box-like)	sp|Q9FM89|FDL38_ARATH(F-box/FBD/LRR-repeat protein At5g56420 OS=Arabidopsis thaliana OX=3702 GN=At5g56420 PE=2 SV=1)
MsG0080047973.01	MsG0080047973.01		1153	1.7716	0.825052	0.0331585	0.171502	no	up	2.20247	1.13912	0.0223125	0.116785	no	up	1.23846	0.308552	0.487473	0.999405	no	up	XP_013467530.1(OVARIAN TUMOR DOMAIN-containing deubiquitinating enzyme 4 [Medicago truncatula])	GO:0016579(biological_process:protein deubiquitination); GO:0004843(molecular_function:thiol-dependent ubiquitin-specific protease activity)				ENOG4111GZF(O:Posttranslational modification, protein turnover, chaperones)	ENOG4111GZF(OTU-like cysteine protease)	PF02338.22(OTU:OTU-like cysteine protease)	sp|Q8LBZ4|OTU4_ARATH(OVARIAN TUMOR DOMAIN-containing deubiquitinating enzyme 4 OS=Arabidopsis thaliana OX=3702 GN=OTU4 PE=1 SV=1)
MsG0080047974.01	MsG0080047974.01		2235	1.36806	0.452133	0.241128	0.542273	no	up	1.00887	0.0127363	0.976023	0.99344	no	up	0.734896	-0.444388	0.182344	0.93841	no	down	XP_013467534.1(receptor protein kinase-like protein ZAR1 [Medicago truncatula])	GO:0006468(biological_process:protein phosphorylation); GO:0016021(cellular_component:integral component of membrane); GO:0005524(molecular_function:ATP binding); GO:0004672(molecular_function:protein kinase activity)				ENOG410YF7E(S:Function unknown)	ENOG410YF7E(Leucine-rich repeat receptor-like protein kinase)	PF07714.20(PK_Tyr_Ser-Thr:Protein tyrosine and serine/threonine kinase); PF00069.28(Pkinase:Protein kinase domain); PF08263.15(LRRNT_2:Leucine rich repeat N-terminal domain); PF13855.9(LRR_8:Leucine rich repeat)	sp|Q9ZU46|ZAR1_ARATH(Receptor protein kinase-like protein ZAR1 OS=Arabidopsis thaliana OX=3702 GN=ZAR1 PE=1 SV=1)
MsG0080047975.01	MsG0080047975.01		2820	1	0	1	1	no test	no test	1	0	1	1	no test	no test	1	0	1	1	no test	no test	GAU50165.1(hypothetical protein TSUD_408680 [Trifolium subterraneum])	GO:0003824(molecular_function:catalytic activity); GO:0016301(molecular_function:kinase activity); GO:0003723(molecular_function:RNA binding); GO:0016310(biological_process:phosphorylation)				ENOG410XS82(S:Function unknown)	ENOG410XS82(Retrotransposon protein)	PF14111.9(DUF4283:Domain of unknown function (DUF4283)); PF00078.30(RVT_1:Reverse transcriptase (RNA-dependent DNA polymerase)); PF03372.26(Exo_endo_phos:Endonuclease/Exonuclease/phosphatase family)
MsG0080047976.01	MsG0080047976.01		2085	2.13041	1.09113	0.0210665	0.129073	no	up	1.7599	0.815497	0.0737275	0.263759	no	up	0.823925	-0.279415	0.516397	0.999405	no	down	XP_003590365.1(protein NUCLEAR FUSION DEFECTIVE 4 [Medicago truncatula])	GO:0016021(cellular_component:integral component of membrane); GO:0016020(cellular_component:membrane); GO:0022857(molecular_function:transmembrane transporter activity)				ENOG41123EZ(S:Function unknown); ENOG410Y8WV(S:Function unknown)	ENOG41123EZ(protein, conserved in leishmania); ENOG410Y8WV(nodulin family)	PF06813.16(Nodulin-like:Nodulin-like)	sp|F4I9E1|NFD4_ARATH(Protein NUCLEAR FUSION DEFECTIVE 4 OS=Arabidopsis thaliana OX=3702 GN=NFD4 PE=3 SV=1)
MsG0080047977.01	MsG0080047977.01		2058	1.06309	0.0882588	0.793004	0.924355	no	up	1.00637	0.00916792	0.979184	0.994167	no	up	0.943756	-0.0835148	0.785378	0.999405	no	down	XP_003590366.2(uncharacterized protein LOC11420781 isoform X2 [Medicago truncatula])	GO:0000127(cellular_component:transcription factor TFIIIC complex); GO:0006384(biological_process:transcription initiation from RNA polymerase III promoter); GO:0004402(molecular_function:histone acetyltransferase activity); GO:0005515(molecular_function:protein binding)				ENOG410ZSFE(S:Function unknown)	ENOG410ZSFE(WD40)	PF12657.10(TFIIIC_delta:Transcription factor IIIC subunit delta N-term); PF00400.35(WD40:WD domain, G-beta repeat)
MsG0080047978.01	MsG0080047978.01		429	0.84632	-0.240724	0.82843	0.938421	no	down	0.414709	-1.26983	0.160489	0.428811	no	down	0.486238	-1.04027	0.350756	0.989111	no	down	XP_024642159.1(acidic endochitinase [Medicago truncatula])	GO:0016787(molecular_function:hydrolase activity); GO:0005975(biological_process:carbohydrate metabolic process); GO:0005615(cellular_component:extracellular space); GO:0000272(biological_process:polysaccharide catabolic process); GO:0005576(cellular_component:extracellular region); GO:0004553(molecular_function:hydrolase activity, hydrolyzing O-glycosyl compounds); GO:0004568(molecular_function:…	K01183	E3.2.1.14	map00520(Amino sugar and nucleotide sugar metabolism)	ENOG4111GPA(G:Carbohydrate transport and metabolism)	ENOG4111GPA(chitinase)	PF00704.31(Glyco_hydro_18:Glycosyl hydrolases family 18)	sp|P36908|CHIA_CICAR(Acidic endochitinase OS=Cicer arietinum OX=3827 PE=2 SV=1)
MsG0080047979.01	MsG0080047979.01		999	1	0	1	1	no test	no test	1	0	1	1	no test	no test	1	0	1	1	no test	no test	AES70076.1(hypothetical protein MTR_3g047490 [Medicago truncatula])	GO:0003735(molecular_function:structural constituent of ribosome); GO:0002181(biological_process:cytoplasmic translation); GO:0022625(cellular_component:cytosolic large ribosomal subunit); GO:0003729(molecular_function:mRNA binding)
MsG0080047980.01	MsG0080047980.01		630	3.40405	1.76725	0.64464	1	no	up	0.390785	-1.35555	0.739734	1	no	down	0.114308	-3.129	0.432473	1	no	down	RHN77304.1(putative RNA-directed DNA polymerase [Medicago truncatula])	GO:0003964(molecular_function:RNA-directed DNA polymerase activity); GO:0015074(biological_process:DNA integration); GO:0008270(molecular_function:zinc ion binding); GO:0003676(molecular_function:nucleic acid binding); GO:0003899(molecular_function:DNA-directed RNA polymerase activity)				COG2801(L:Replication, recombination and repair)	COG2801(Retrotransposon protein)		sp|P04146|COPIA_DROME(Copia protein OS=Drosophila melanogaster OX=7227 GN=GIP PE=1 SV=3)
MsG0080047981.01	MsG0080047981.01		711	0.0861724	-3.53663	0.173051	1	no	down	0.0596431	-4.0675	0.109991	1	no	down	1	0	1	1	no test	no test	RHN77304.1(putative RNA-directed DNA polymerase [Medicago truncatula])	GO:0003964(molecular_function:RNA-directed DNA polymerase activity); GO:0015074(biological_process:DNA integration); GO:0008270(molecular_function:zinc ion binding); GO:0003676(molecular_function:nucleic acid binding); GO:0003899(molecular_function:DNA-directed RNA polymerase activity)				COG2801(L:Replication, recombination and repair)	COG2801(Retrotransposon protein)		sp|Q94HW2|POLR1_ARATH(Retrovirus-related Pol polyprotein from transposon RE1 OS=Arabidopsis thaliana OX=3702 GN=RE1 PE=2 SV=1)
MsG0080047982.01	MsG0080047982.01		165	1	0	1	1	no test	no test	1	0	1	1	no test	no test	1	0	1	1	no test	no test	ABD32582.1(Integrase, catalytic region; Zinc finger, CCHC-type; Peptidase aspartic, catalytic [Medicago truncatula])	GO:0019773(cellular_component:proteasome core complex, alpha-subunit complex); GO:0015074(biological_process:DNA integration); GO:0006511(biological_process:ubiquitin-dependent protein catabolic process); GO:0008270(molecular_function:zinc ion binding); GO:0003676(molecular_function:nucleic acid binding); GO:0003964(molecular_function:RNA-directed DNA polymerase activity); GO:0003899(molecular_fu…				COG2801(L:Replication, recombination and repair)	COG2801(Retrotransposon protein)		sp|P92519|M810_ARATH(Uncharacterized mitochondrial protein AtMg00810 OS=Arabidopsis thaliana OX=3702 GN=AtMg00810 PE=4 SV=1)
MsG0080047983.01	MsG0080047983.01		468	1	0	1	1	no test	no test	1	0	1	1	no test	no test	1	0	1	1	no test	no test	KEH41794.1(ECA1 gametogenesis related family [Medicago truncatula])	GO:0016021(cellular_component:integral component of membrane); GO:0110165(cellular_component:cellular anatomical entity)				ENOG4111CTR(S:Function unknown); ENOG4111C9E(S:Function unknown)	ENOG4111CTR(Pfam:DUF784); ENOG4111C9E(Pfam:DUF784)	PF05617.14(Prolamin_like:Prolamin-like)
MsG0080047984.01	MsG0080047984.01		831	1	0	1	1	no test	no test	1	0	1	1	no test	no test	1	0	1	1	no test	no test	RHN39327.1(putative RNA-directed DNA polymerase [Medicago truncatula])	GO:0016787(molecular_function:hydrolase activity); GO:0004805(molecular_function:trehalose-phosphatase activity); GO:0016021(cellular_component:integral component of membrane); GO:0030247(molecular_function:polysaccharide binding); GO:0005992(biological_process:trehalose biosynthetic process); GO:0003887(molecular_function:DNA-directed DNA polymerase activity); GO:0015074(biological_process:DNA i…						PF14223.9(Retrotran_gag_2:gag-polypeptide of LTR copia-type); PF00098.26(zf-CCHC:Zinc knuckle)	sp|P10978|POLX_TOBAC(Retrovirus-related Pol polyprotein from transposon TNT 1-94 OS=Nicotiana tabacum OX=4097 PE=2 SV=1)
MsG0080047985.01	MsG0080047985.01		1743	0.947078	-0.0784455	0.952932	1	no	down	0.635943	-0.65303	0.681233	1	no	down	0.671295	-0.574982	0.708174	1	no	down	KEH42183.1(4-coumarate:CoA ligase-like protein [Medicago truncatula])	GO:0016405(molecular_function:CoA-ligase activity); GO:0003824(molecular_function:catalytic activity); GO:0016021(cellular_component:integral component of membrane); GO:0016874(molecular_function:ligase activity); GO:0008152(biological_process:metabolic process)	K01904	4CL	map00130(Ubiquinone and other terpenoid-quinone biosynthesis); map00940(Phenylpropanoid biosynthesis)	COG0318(I:Lipid transport and metabolism); COG0318(Q:Secondary metabolites biosynthesis, transport and catabolism)	COG0318(Amp-dependent synthetase and ligase); COG0318(Amp-dependent synthetase and ligase)	PF00501.31(AMP-binding:AMP-binding enzyme)	sp|M4IQS1|CCL10_HUMLU(Probable CoA ligase CCL10 OS=Humulus lupulus OX=3486 GN=CCL10 PE=2 SV=1)
MsG0080047986.01	MsG0080047986.01		3647	1.5353	0.618516	0.0141205	0.0979567	no	up	1.45091	0.536956	0.0643203	0.241858	no	up	0.941831	-0.0864602	0.739848	0.999405	no	down	XP_013456334.1(uncharacterized protein LOC25492688 [Medicago truncatula])	GO:0018107(biological_process:peptidyl-threonine phosphorylation); GO:0006468(biological_process:protein phosphorylation); GO:0018105(biological_process:peptidyl-serine phosphorylation); GO:0016021(cellular_component:integral component of membrane); GO:0004674(molecular_function:protein serine/threonine kinase activity); GO:0004712(molecular_function:protein serine/threonine/tyrosine kinase activ…				COG4886(S:Function unknown)	COG4886(leucine Rich Repeat)	PF00069.28(Pkinase:Protein kinase domain); PF07714.20(PK_Tyr_Ser-Thr:Protein tyrosine and serine/threonine kinase); PF13855.9(LRR_8:Leucine rich repeat); PF12799.10(LRR_4:Leucine Rich repeats (2 copies)); PF17667.4(Pkinase_fungal:Fungal protein kinase); PF14580.9(LRR_9:Leucine-rich repeat)	sp|Q9ZQ31|STY13_ARATH(Serine/threonine-protein kinase STY13 OS=Arabidopsis thaliana OX=3702 GN=STY13 PE=1 SV=2)
MsG0080047987.01	MsG0080047987.01		1743	0.892248	-0.164483	0.641788	0.85461	no	down	0.846574	-0.240291	0.404319	0.700043	no	down	0.944455	-0.0824455	0.799297	0.999405	no	down	CAA05493.1(protein phosphatase 1 catalitic subunit [Medicago sativa])	GO:0005737(cellular_component:cytoplasm); GO:0016787(molecular_function:hydrolase activity); GO:0017018(molecular_function:myosin phosphatase activity); GO:0005634(cellular_component:nucleus); GO:0004722(molecular_function:protein serine/threonine phosphatase activity); GO:0046872(molecular_function:metal ion binding)	K06269	PPP1C	map03015(mRNA surveillance pathway)	COG0639(T:Signal transduction mechanisms)	COG0639(serine threonine-protein phosphatase)	PF00149.31(Metallophos:Calcineurin-like phosphoesterase); PF16891.8(STPPase_N:Serine-threonine protein phosphatase N-terminal domain)	sp|P48489|PP1_ORYSJ(Serine/threonine-protein phosphatase PP1 OS=Oryza sativa subsp. japonica OX=39947 GN=Os03g0268000 PE=2 SV=2)
MsG0080047988.01	MsG0080047988.01		1209	0.977536	-0.0327777	0.937033	0.981412	no	down	0.772105	-0.37313	0.417151	0.711089	no	down	0.788031	-0.343676	0.405297	0.999405	no	down	XP_003591091.1(uncharacterized protein LOC11408723 [Medicago truncatula])	GO:0030896(cellular_component:checkpoint clamp complex); GO:0033314(biological_process:mitotic DNA replication checkpoint); GO:0000077(biological_process:DNA damage checkpoint); GO:0031573(biological_process:intra-S DNA damage checkpoint); GO:0000724(biological_process:double-strand break repair via homologous recombination); GO:0035861(cellular_component:site of double-strand break); GO:0005730(…	K10903	HUS1				PF04005.15(Hus1:Hus1-like protein)	sp|Q54NC0|HUS1_DICDI(Checkpoint protein hus1 homolog OS=Dictyostelium discoideum OX=44689 GN=hus1 PE=3 SV=1)
MsG0080047989.01	MsG0080047989.01		1500	1.4056	0.491183	0.129027	0.390565	no	up	1.68526	0.752975	0.0213478	0.113347	no	up	1.19385	0.255619	0.345683	0.988329	no	up	XP_003591093.1(amidase 1 [Medicago truncatula])	GO:0043864(molecular_function:indoleacetamide hydrolase activity); GO:0016811(molecular_function:hydrolase activity, acting on carbon-nitrogen (but not peptide) bonds, in linear amides); GO:0004040(molecular_function:amidase activity)	K01426	E3.5.1.4, amiE	map00360(Phenylalanine metabolism); map00330(Arginine and proline metabolism); map00380(Tryptophan metabolism)	COG0154(J:Translation, ribosomal structure and biogenesis)	COG0154(Allows the formation of correctly charged Gln-tRNA(Gln) through the transamidation of misacylated Glu-tRNA(Gln) in organisms which lack glutaminyl-tRNA synthetase. The reaction takes place in the presence of glutamine and ATP through an activated gamma-phospho-Glu-tRNA(Gln) (By similarity))	PF01425.24(Amidase:Amidase)	sp|Q9FR37|AMI1_ARATH(Amidase 1 OS=Arabidopsis thaliana OX=3702 GN=AMI1 PE=1 SV=1)
MsG0080047990.01	MsG0080047990.01		1432	25.1069	4.65001	0.00220253	0.026443	yes	up	3.96482	1.98726	0.214937	1	no	up	0.155059	-2.68911	0.0393189	0.689492	no	down	RHN80760.1(putative short-chain dehydrogenase/reductase SDR [Medicago truncatula])	GO:0016491(molecular_function:oxidoreductase activity)				COG1028(S:Function unknown)	COG1028(Dehydrogenase reductase)	PF13561.9(adh_short_C2:Enoyl-(Acyl carrier protein) reductase); PF00106.28(adh_short:short chain dehydrogenase); PF08659.13(KR:KR domain)	sp|Q5KTS5|GRDH_DAUCA(Glucose and ribitol dehydrogenase OS=Daucus carota OX=4039 GN=CAISE5 PE=2 SV=1)
MsG0080047991.01	MsG0080047991.01		1270	1.46694	0.552815	0.32373	0.630235	no	up	1.3963	0.481606	0.394248	0.691511	no	up	0.950392	-0.0734047	0.874283	0.999405	no	down	XP_013469011.1(uncharacterized protein LOC25484662 [Medicago truncatula])	GO:0018024(molecular_function:histone-lysine N-methyltransferase activity)				ENOG410Z61K(S:Function unknown)	ENOG410Z61K(Ubiquitin-binding WIYLD domain)	PF10440.12(WIYLD:Ubiquitin-binding WIYLD domain)
MsG0080047992.01	MsG0080047992.01		2884	0.465854	-1.10205	0.0137977	0.0966118	no	down	0.276497	-1.85466	0.000574151	0.0075853	yes	down	0.592748	-0.754509	0.0970937	0.851497	no	down	XP_013469013.1(serine/threonine-protein kinase EDR1 [Medicago truncatula])	GO:0005737(cellular_component:cytoplasm); GO:0006468(biological_process:protein phosphorylation); GO:0004674(molecular_function:protein serine/threonine kinase activity); GO:0007165(biological_process:signal transduction); GO:0004672(molecular_function:protein kinase activity); GO:0005524(molecular_function:ATP binding)				COG0515(T:Signal transduction mechanisms)	COG0515(Serine Threonine protein kinase)	PF14381.9(EDR1:Ethylene-responsive protein kinase Le-CTR1); PF07714.20(PK_Tyr_Ser-Thr:Protein tyrosine and serine/threonine kinase); PF00069.28(Pkinase:Protein kinase domain)	sp|Q9FPR3|EDR1_ARATH(Serine/threonine-protein kinase EDR1 OS=Arabidopsis thaliana OX=3702 GN=EDR1 PE=1 SV=1)
MsG0080047993.01	MsG0080047993.01		2643	0.368856	-1.43887	0.00460952	0.0454592	yes	down	0.473511	-1.07853	0.11764	0.356429	no	down	1.27972	0.355831	0.540661	0.999405	no	up	XP_013469014.1(kinesin-like protein KIN-14U [Medicago truncatula])	GO:0008574(molecular_function:ATP-dependent microtubule motor activity, plus-end-directed); GO:0008017(molecular_function:microtubule binding); GO:0007018(biological_process:microtubule-based movement); GO:0030705(biological_process:cytoskeleton-dependent intracellular transport); GO:0003777(molecular_function:microtubule motor activity); GO:0016887(molecular_function:ATPase activity); GO:0005871…				COG5059(Z:Cytoskeleton)	COG5059(Kinesin family member)	PF00225.26(Kinesin:Kinesin motor domain); PF16796.8(Microtub_bd:Microtubule binding)	sp|Q8W0Y9|KN14U_ARATH(Kinesin-like protein KIN-14U OS=Arabidopsis thaliana OX=3702 GN=KIN14U PE=2 SV=1)
MsG0080047994.01	MsG0080047994.01		795	1.35847	0.441984	0.216205	0.515468	no	up	1.01831	0.02618	0.944783	0.983829	no	up	0.746754	-0.421294	0.186316	0.93841	no	down	XP_024641352.1(F-box protein At2g17036 isoform X2 [Medicago truncatula])	GO:0007165(biological_process:signal transduction)						PF03478.21(DUF295:Protein of unknown function (DUF295))	sp|Q6DR20|FB110_ARATH(F-box protein At2g17036 OS=Arabidopsis thaliana OX=3702 GN=At2g17036 PE=2 SV=1)
MsG0080047995.01	MsG0080047995.01		813	1.30257	0.381357	0.380927	0.681056	no	up	1.05428	0.076264	0.849014	0.95269	no	up	0.804758	-0.313373	0.365979	0.992308	no	down	XP_039683147.1(F-box protein SKIP23 [Medicago truncatula])	GO:0007165(biological_process:signal transduction)						PF03478.21(DUF295:Protein of unknown function (DUF295))	sp|Q3EBZ2|SKI23_ARATH(F-box protein SKIP23 OS=Arabidopsis thaliana OX=3702 GN=SKIP23 PE=1 SV=1)
MsG0080047996.01	MsG0080047996.01		3098	1.38329	0.468102	0.0736369	0.282088	no	up	0.980724	-0.0280815	0.924303	0.977893	no	down	0.706839	-0.500546	0.0597959	0.758007	no	down	XP_039683147.1(F-box protein SKIP23 [Medicago truncatula])	GO:0007165(biological_process:signal transduction); GO:0005515(molecular_function:protein binding)						PF03478.21(DUF295:Protein of unknown function (DUF295))	sp|Q3EBZ2|SKI23_ARATH(F-box protein SKIP23 OS=Arabidopsis thaliana OX=3702 GN=SKIP23 PE=1 SV=1)
MsG0080047997.01	MsG0080047997.01		1452	0.662722	-0.593524	0.647383	0.85689	no	down	0.32689	-1.61312	0.102507	0.326749	no	down	0.493901	-1.01771	0.38673	0.998221	no	down	RHN50709.1(putative F-box domain-containing protein [Medicago truncatula])	GO:0007165(biological_process:signal transduction)						PF03478.21(DUF295:Protein of unknown function (DUF295))	sp|Q3EBZ2|SKI23_ARATH(F-box protein SKIP23 OS=Arabidopsis thaliana OX=3702 GN=SKIP23 PE=1 SV=1)
MsG0080047998.01	MsG0080047998.01		168	1	0	1	1	no test	no test	1	0	1	1	no test	no test	1	0	1	1	no test	no test	XP_024628913.1(protein MAIN-LIKE 1-like [Medicago truncatula])	GO:0016787(molecular_function:hydrolase activity); GO:0010073(biological_process:meristem maintenance); GO:0016021(cellular_component:integral component of membrane); GO:0004523(molecular_function:RNA-DNA hybrid ribonuclease activity); GO:0008483(molecular_function:transaminase activity); GO:0003676(molecular_function:nucleic acid binding)						PF10536.12(PMD:Plant mobile domain)
MsG0080047999.01	MsG0080047999.01		1648	2.40565	1.26643	0.00627366	0.0564898	no	up	1.92042	0.941422	0.09199	0.304075	no	up	0.796634	-0.328011	0.45445	0.999405	no	down	AAB48058.1(asparagine synthetase [Medicago sativa])	GO:0006529(biological_process:asparagine biosynthetic process); GO:0070981(biological_process:L-asparagine biosynthetic process); GO:0005829(cellular_component:cytosol); GO:0006541(biological_process:glutamine metabolic process); GO:0004066(molecular_function:asparagine synthase (glutamine-hydrolyzing) activity); GO:0005524(molecular_function:ATP binding)	K01953	asnB, ASNS	map00250(Alanine, aspartate and glutamate metabolism)	COG0367(E:Amino acid transport and metabolism)	COG0367(asparagine synthetase)	PF00733.24(Asn_synthase:Asparagine synthase); PF13537.9(GATase_7:Glutamine amidotransferase domain); PF12481.11(DUF3700:Aluminium induced protein)	sp|P19251|ASNS1_PEA(Asparagine synthetase, nodule [glutamine-hydrolyzing] OS=Pisum sativum OX=3888 GN=AS1 PE=2 SV=3)
MsG0080048000.01	MsG0080048000.01		3045	1.80482	0.851858	0.00125002	0.0178033	no	up	1.76664	0.821006	0.0014926	0.0159819	no	up	0.976558	-0.0342224	0.881053	0.999405	no	down	XP_013449410.1(nitrate regulatory gene2 protein [Medicago truncatula])					ENOG410YACB(S:Function unknown)	ENOG410YACB(Protein of unknown function (DUF632))	PF04782.15(DUF632:Protein of unknown function (DUF632)); PF04783.15(DUF630:Protein of unknown function (DUF630))	sp|Q93YU8|NRG2_ARATH(Nitrate regulatory gene2 protein OS=Arabidopsis thaliana OX=3702 GN=NRG2 PE=1 SV=1)
MsG0080048001.01	MsG0080048001.01		1101	1.71961	0.782084	0.0561494	0.237842	no	up	1.68468	0.752475	0.0694343	0.254036	no	up	0.975589	-0.0356541	0.910735	0.999405	no	down	XP_013449407.1(serine/threonine-protein kinase D6PK [Medicago truncatula])	GO:0005737(cellular_component:cytoplasm); GO:0006468(biological_process:protein phosphorylation); GO:0005634(cellular_component:nucleus); GO:0005886(cellular_component:plasma membrane); GO:0004674(molecular_function:protein serine/threonine kinase activity); GO:0004672(molecular_function:protein kinase activity); GO:0005524(molecular_function:ATP binding)				ENOG410XQ0C(T:Signal transduction mechanisms)	ENOG410XQ0C(serine threonine-protein kinase)	PF00069.28(Pkinase:Protein kinase domain); PF07714.20(PK_Tyr_Ser-Thr:Protein tyrosine and serine/threonine kinase)	sp|Q39183|D6KL2_ARATH(Serine/threonine-protein kinase D6PKL2 OS=Arabidopsis thaliana OX=3702 GN=D6PKL2 PE=1 SV=1)
MsG0080048002.01	MsG0080048002.01		1569	0.564352	-0.825332	0.839711	1	no	down	0.390785	-1.35555	0.739734	1	no	down	1	0	1	1	no test	no test	AES81771.2(DUF674 family protein [Medicago truncatula])					ENOG410YEB9(S:Function unknown)	ENOG410YEB9(Protein of unknown function (DUF674))	PF05056.15(DUF674:Protein of unknown function (DUF674))
MsG0080048003.01	MsG0080048003.01		834	2.14091	1.09822	0.787821	1	no	up	2.80263	1.48678	0.712572	1	no	up	1.29681	0.374965	0.925987	1	no	up	XP_003624539.1(DNA cross-link repair protein SNM1 isoform X1 [Medicago truncatula])	GO:0016787(molecular_function:hydrolase activity); GO:0031848(biological_process:protection from non-homologous end joining at telomere); GO:0006303(biological_process:double-strand break repair via nonhomologous end joining); GO:0006281(biological_process:DNA repair); GO:0005634(cellular_component:nucleus); GO:0036297(biological_process:interstrand cross-link repair); GO:0006974(biological_proce…	K15340	DCLRE1A, SNM1A, PSO2		COG1236(J:Translation, ribosomal structure and biogenesis)	COG1236(cleavage and polyadenylation)		sp|Q38961|SNM1_ARATH(DNA cross-link repair protein SNM1 OS=Arabidopsis thaliana OX=3702 GN=SNM1 PE=2 SV=1)
MsG0080048004.01	MsG0080048004.01		1284	1	0	1	1	no test	no test	1.48247	0.567999	0.889293	1	no	up	1.34376	0.426279	0.916798	1	no	up	KEH16643.1(hypothetical protein MTR_0126s0010 [Medicago truncatula])							PF20167.1(Transposase_32:Putative plant transposon protein)
MsG0080048005.01	MsG0080048005.01		543	1.41903	0.504901	0.618652	0.841453	no	up	0.995276	-0.00683183	0.994519	0.998632	no	down	0.703597	-0.50718	0.531501	0.999405	no	down	XP_013451595.1(probable magnesium transporter NIPA8 [Medicago truncatula])	GO:0016021(cellular_component:integral component of membrane); GO:0005769(cellular_component:early endosome); GO:0015095(molecular_function:magnesium ion transmembrane transporter activity); GO:0005886(cellular_component:plasma membrane)	K22733	NIPA, SLC57A2S		ENOG410XNR8(S:Function unknown)	ENOG410XNR8(NIPA-like domain containing)	PF05653.17(Mg_trans_NIPA:Magnesium transporter NIPA)	sp|Q8RWF4|NIPA8_ARATH(Probable magnesium transporter NIPA8 OS=Arabidopsis thaliana OX=3702 GN=At3g26670 PE=2 SV=1)
MsG0080048006.01	MsG0080048006.01		1035	0.348492	-1.5208	0.707643	1	no	down	0.882831	-0.17979	0.964252	1	no	down	2.53485	1.3419	0.739525	1	no	up	XP_003601289.1(polygalacturonase 1 beta-like protein 1 [Medicago truncatula])					ENOG410YDAC(S:Function unknown)	ENOG410YDAC(Noncatalytic subunit)	PF03181.18(BURP:BURP domain)	sp|P92982|PGL1_ARATH(Polygalacturonase 1 beta-like protein 1 OS=Arabidopsis thaliana OX=3702 GN=PGL1 PE=2 SV=2)
MsG0080048007.01	MsG0080048007.01		270	1	0	1	1	no test	no test	1	0	1	1	no test	no test	1	0	1	1	no test	no test	YP_009382573.1(hypothetical protein AEK19_MT2142 [Utricularia reniformis])	GO:0005739(cellular_component:mitochondrion)				ENOG4111E2V(S:Function unknown)	ENOG4111E2V(-)
MsG0080048008.01	MsG0080048008.01		588	0.59729	-0.743498	0.516952	0.781842	no	down	0.603414	-0.728781	0.442467	0.731005	no	down	1.00333	0.00480086	0.996772	1	no	up	YP_009237628.1(ATPase subunit 4 [Medicago truncatula])	GO:0016021(cellular_component:integral component of membrane); GO:0000276(cellular_component:mitochondrial proton-transporting ATP synthase complex, coupling factor F(o)); GO:0015078(molecular_function:hydrogen ion transmembrane transporter activity); GO:0015986(biological_process:ATP synthesis coupled proton transport)				ENOG410YFZM(F:Nucleotide transport and metabolism)	ENOG410YFZM(ATP synthase protein)	PF05405.17(Mt_ATP-synt_B:Mitochondrial ATP synthase B chain precursor (ATP-synt_B))	sp|P09003|MI25_TOBAC(ATP synthase protein MI25 OS=Nicotiana tabacum OX=4097 PE=2 SV=1)
MsG0080048009.01	MsG0080048009.01		342	0.204599	-2.28913	0.423391	1	no	down	0.387245	-1.36868	0.612582	1	no	down	1.87868	0.909721	0.819945	1	no	up	KAG4979120.1(hypothetical protein JHK85_033078 [Glycine max])	GO:0016021(cellular_component:integral component of membrane); GO:0009536(cellular_component:plastid); GO:0016651(molecular_function:oxidoreductase activity, acting on NAD(P)H); GO:0042773(biological_process:ATP synthesis coupled electron transport)	K03882	ND4L	map00190(Oxidative phosphorylation)	COG0713(C:Energy production and conversion)	COG0713(NDH-1 shuttles electrons from NADH, via FMN and iron- sulfur (Fe-S) centers, to quinones in the respiratory chain. The immediate electron acceptor for the enzyme in this species is believed to be ubiquinone. Couples the redox reaction to proton translocation (for every two electrons transferred, four hydrogen ions are translocated across the cytoplasmic membrane), and thus conserves the r…	PF00420.27(Oxidored_q2:NADH-ubiquinone/plastoquinone oxidoreductase chain 4L)	sp|Q04614|NU4LM_ARATH(NADH-ubiquinone oxidoreductase chain 4L OS=Arabidopsis thaliana OX=3702 GN=ND4L PE=1 SV=2)
MsG0080048010.01	MsG0080048010.01		207	1	0	1	1	no test	no test	1	0	1	1	no test	no test	1	0	1	1	no test	no test	RHN51296.1(putative NADH:ubiquinone reductase (H(+)-translocating) [Medicago truncatula])	GO:0016021(cellular_component:integral component of membrane); GO:0009536(cellular_component:plastid); GO:0016651(molecular_function:oxidoreductase activity, acting on NAD(P)H); GO:0005739(cellular_component:mitochondrion); GO:0042773(biological_process:ATP synthesis coupled electron transport)	K03882	ND4L	map00190(Oxidative phosphorylation)	COG0713(C:Energy production and conversion)	COG0713(NDH-1 shuttles electrons from NADH, via FMN and iron- sulfur (Fe-S) centers, to quinones in the respiratory chain. The immediate electron acceptor for the enzyme in this species is believed to be ubiquinone. Couples the redox reaction to proton translocation (for every two electrons transferred, four hydrogen ions are translocated across the cytoplasmic membrane), and thus conserves the r…	PF00420.27(Oxidored_q2:NADH-ubiquinone/plastoquinone oxidoreductase chain 4L)	sp|Q04614|NU4LM_ARATH(NADH-ubiquinone oxidoreductase chain 4L OS=Arabidopsis thaliana OX=3702 GN=ND4L PE=1 SV=2)
MsG0080048011.01	MsG0080048011.01		963	1.61126	0.688186	0.489836	0.763802	no	up	0.639224	-0.645606	0.585356	1	no	down	0.396579	-1.33432	0.215821	0.954629	no	down	GAU19198.1(hypothetical protein TSUD_198810 [Trifolium subterraneum])	GO:0009536(cellular_component:plastid); GO:0015990(biological_process:electron transport coupled proton transport); GO:0008137(molecular_function:NADH dehydrogenase (ubiquinone) activity); GO:0016021(cellular_component:integral component of membrane); GO:0031966(cellular_component:mitochondrial membrane); GO:0009060(biological_process:aerobic respiration); GO:0070469(cellular_component:respirator…	K03881	ND4	map00190(Oxidative phosphorylation)	COG1008(C:Energy production and conversion)	COG1008(subunit m)	PF00361.23(Proton_antipo_M:Proton-conducting membrane transporter)	sp|Q04050|NU4M_BRACM(NADH-ubiquinone oxidoreductase chain 4 OS=Brassica campestris OX=3711 GN=ND4 PE=3 SV=1)
MsG0080048012.01	MsG0080048012.01		240	1	0	1	1	no test	no test	1	0	1	1	no test	no test	1	0	1	1	no test	no test	KAI4298007.1(hypothetical protein L6164_037859 [Bauhinia variegata])	GO:0008137(molecular_function:NADH dehydrogenase (ubiquinone) activity); GO:0016021(cellular_component:integral component of membrane); GO:0009536(cellular_component:plastid); GO:0042773(biological_process:ATP synthesis coupled electron transport); GO:0005739(cellular_component:mitochondrion)
MsG0080048013.01	MsG0080048013.01		180	1	0	1	1	no test	no test	1	0	1	1	no test	no test	1	0	1	1	no test	no test	BAU03761.1(hypothetical protein VIGAN_UM174800 [Vigna angularis var. angularis])	GO:0016021(cellular_component:integral component of membrane); GO:0009916(molecular_function:alternative oxidase activity); GO:0005739(cellular_component:mitochondrion); GO:0010230(biological_process:alternative respiration); GO:0070469(cellular_component:respiratory chain); GO:0046872(molecular_function:metal ion binding); GO:0102721(molecular_function:ubiquinol:oxygen oxidoreductase activity)	K17893	AOX1, AOX2		ENOG410YFEH(S:Function unknown)	ENOG410YFEH(alternative oxidase)		sp|O03376|AOX3_SOYBN(Alternative oxidase 3, mitochondrial OS=Glycine max OX=3847 GN=AOX3 PE=1 SV=1)
MsG0080048014.01	MsG0080048014.01		720	2.07527	1.0533	0.761177	1	no	up	2.12474	1.08728	0.707514	1	no	up	1.02129	0.0303987	0.990097	1	no	up	KEH26140.1(IPP transferase [Medicago truncatula])	GO:0015074(biological_process:DNA integration); GO:0016740(molecular_function:transferase activity); GO:0004190(molecular_function:aspartic-type endopeptidase activity); GO:0008270(molecular_function:zinc ion binding); GO:0003676(molecular_function:nucleic acid binding); GO:0003964(molecular_function:RNA-directed DNA polymerase activity); GO:0006508(biological_process:proteolysis)							sp|Q9UR07|TF211_SCHPO(Transposon Tf2-11 polyprotein OS=Schizosaccharomyces pombe (strain 972 / ATCC 24843) OX=284812 GN=Tf2-11 PE=3 SV=1)
MsG0080048015.01	MsG0080048015.01		2088	0.268965	-1.89451	0.530354	1	no	down	0.0962939	-3.37641	0.360062	1	no	down	0.354222	-1.49727	0.713666	1	no	down	KEH17438.1(hypothetical protein MTR_0015s0160 [Medicago truncatula])	GO:0016021(cellular_component:integral component of membrane)						PF20167.1(Transposase_32:Putative plant transposon protein)
MsG0080048016.01	MsG0080048016.01		773	1.05154	0.0725091	0.825316	0.936646	no	up	1.05062	0.0712407	0.788558	0.928302	no	up	0.996523	-0.00502497	0.986591	0.999405	no	down	AES79543.1(BAG family molecular chaperone regulator [Medicago truncatula])	GO:0050821(biological_process:protein stabilization); GO:0051087(molecular_function:chaperone binding); GO:0000774(molecular_function:adenyl-nucleotide exchange factor activity); GO:0005515(molecular_function:protein binding)				ENOG4111WNH(O:Posttranslational modification, protein turnover, chaperones)	ENOG4111WNH(BCL-2-associated athanogene)	PF02179.19(BAG:BAG domain); PF00240.26(ubiquitin:Ubiquitin family); PF18396.4(TBK1_ULD:TANK binding kinase 1 ubiquitin-like domain)	sp|Q8RX71|BAG4_ARATH(BAG family molecular chaperone regulator 4 OS=Arabidopsis thaliana OX=3702 GN=BAG4 PE=1 SV=1)
MsG0080048017.01	MsG0080048017.01		459	1	0	1	1	no test	no test	1.48247	0.567999	0.889293	1	no	up	1.34376	0.426279	0.916798	1	no	up	XP_003623323.1(transcription factor LAX PANICLE 1 [Medicago truncatula])	GO:0003700(molecular_function:transcription factor activity, sequence-specific DNA binding); GO:0046983(molecular_function:protein dimerization activity); GO:0047627(molecular_function:adenylylsulfatase activity); GO:0005634(cellular_component:nucleus); GO:0003677(molecular_function:DNA binding)				ENOG410Z0JU(S:Function unknown)	ENOG410Z0JU(Helix-loop-helix DNA-binding domain)	PF00010.29(HLH:Helix-loop-helix DNA-binding domain)	sp|Q7XAQ6|LAX1_ORYSJ(Transcription factor LAX PANICLE 1 OS=Oryza sativa subsp. japonica OX=39947 GN=LAX1 PE=1 SV=1)
MsG0080048018.01	MsG0080048018.01		3423	0.664722	-0.589176	0.305052	0.611322	no	down	1.79164	0.841282	0.113227	0.34857	no	up	2.67095	1.41735	0.00194858	0.182853	no	up	AES79540.2(disease resistance protein (TIR-NBS-LRR class), putative [Medicago truncatula])	GO:0006952(biological_process:defense response); GO:0043531(molecular_function:ADP binding); GO:0007165(biological_process:signal transduction); GO:0005515(molecular_function:protein binding); GO:0003677(molecular_function:DNA binding)				ENOG4111THG(S:Function unknown); COG4886(S:Function unknown)	ENOG4111THG(Resistance protein); COG4886(leucine Rich Repeat)	PF01582.23(TIR:TIR domain); PF00931.25(NB-ARC:NB-ARC domain); PF13676.9(TIR_2:TIR domain); PF13855.9(LRR_8:Leucine rich repeat); PF12799.10(LRR_4:Leucine Rich repeats (2 copies)); PF07725.15(LRR_3:Leucine Rich Repeat); PF13191.9(AAA_16:AAA ATPase domain)	sp|Q40392|TMVRN_NICGU(TMV resistance protein N OS=Nicotiana glutinosa OX=35889 GN=N PE=1 SV=1)
MsG0080048019.01	MsG0080048019.01		3574	0.709137	-0.495864	0.304611	0.611102	no	down	1.9429	0.958209	0.0193914	0.106123	no	up	2.71684	1.44193	0.00357009	0.25178	no	up	AES79540.2(disease resistance protein (TIR-NBS-LRR class), putative [Medicago truncatula])	GO:0006952(biological_process:defense response); GO:0043531(molecular_function:ADP binding); GO:0007165(biological_process:signal transduction); GO:0005515(molecular_function:protein binding); GO:0003677(molecular_function:DNA binding)				ENOG4111THG(S:Function unknown); COG4886(S:Function unknown)	ENOG4111THG(Resistance protein); COG4886(leucine Rich Repeat)	PF01582.23(TIR:TIR domain); PF00931.25(NB-ARC:NB-ARC domain); PF13676.9(TIR_2:TIR domain); PF13855.9(LRR_8:Leucine rich repeat); PF12799.10(LRR_4:Leucine Rich repeats (2 copies)); PF13191.9(AAA_16:AAA ATPase domain); PF07725.15(LRR_3:Leucine Rich Repeat)	sp|A0A290U7C4|ROQ1_NICBE(Disease resistance protein Roq1 OS=Nicotiana benthamiana OX=4100 GN=ROQ1 PE=1 SV=1)
MsG0080048020.01	MsG0080048020.01		654	1	0	1	1	no test	no test	1	0	1	1	no test	no test	1	0	1	1	no test	no test	RHN77304.1(putative RNA-directed DNA polymerase [Medicago truncatula])	GO:0003964(molecular_function:RNA-directed DNA polymerase activity); GO:0015074(biological_process:DNA integration); GO:0008270(molecular_function:zinc ion binding); GO:0003676(molecular_function:nucleic acid binding); GO:0003899(molecular_function:DNA-directed RNA polymerase activity)				COG2801(L:Replication, recombination and repair)	COG2801(Retrotransposon protein)		sp|P04146|COPIA_DROME(Copia protein OS=Drosophila melanogaster OX=7227 GN=GIP PE=1 SV=3)
MsG0080048021.01	MsG0080048021.01		735	0.327303	-1.6113	0.67532	1	no	down	0.116333	-3.10367	0.435569	1	no	down	0.354222	-1.49727	0.713666	1	no	down	RHN77304.1(putative RNA-directed DNA polymerase [Medicago truncatula])	GO:0003964(molecular_function:RNA-directed DNA polymerase activity); GO:0015074(biological_process:DNA integration); GO:0008270(molecular_function:zinc ion binding); GO:0003676(molecular_function:nucleic acid binding); GO:0003899(molecular_function:DNA-directed RNA polymerase activity)				COG2801(L:Replication, recombination and repair)	COG2801(Retrotransposon protein)		sp|Q94HW2|POLR1_ARATH(Retrovirus-related Pol polyprotein from transposon RE1 OS=Arabidopsis thaliana OX=3702 GN=RE1 PE=2 SV=1)
MsG0080048022.01	MsG0080048022.01		345	0.348492	-1.5208	0.707643	1	no	down	0.241832	-2.04792	0.613576	1	no	down	1	0	1	1	no test	no test	KEH33597.1(hypothetical protein MTR_3g448730 [Medicago truncatula])	GO:0052924(molecular_function:all-trans-nonaprenyl-diphosphate synthase (geranylgeranyl-diphosphate specific) activity); GO:0052923(molecular_function:all-trans-nonaprenyl-diphosphate synthase (geranyl-diphosphate specific) activity); GO:0015074(biological_process:DNA integration); GO:0008270(molecular_function:zinc ion binding); GO:0003676(molecular_function:nucleic acid binding); GO:0003964(mol…				COG2801(L:Replication, recombination and repair)	COG2801(Retrotransposon protein)		sp|P04146|COPIA_DROME(Copia protein OS=Drosophila melanogaster OX=7227 GN=GIP PE=1 SV=3)
MsG0080048023.01	MsG0080048023.01		453	1	0	1	1	no	no change	1.48247	0.567999	0.889293	1	no	up	1.34376	0.426279	0.916798	1	no	up	AES80922.1(hypothetical protein MTR_7g086540 [Medicago truncatula])	GO:0003964(molecular_function:RNA-directed DNA polymerase activity); GO:0015074(biological_process:DNA integration); GO:0008270(molecular_function:zinc ion binding); GO:0003676(molecular_function:nucleic acid binding)
MsG0080048024.01	MsG0080048024.01		3704	1.22308	0.290519	0.397754	0.695256	no	up	1.16813	0.224204	0.533695	0.79842	no	up	0.952781	-0.0697831	0.84494	0.999405	no	down	KEH22677.1(S-locus lectin kinase family protein [Medicago truncatula])	GO:0006468(biological_process:protein phosphorylation); GO:0016020(cellular_component:membrane); GO:0016021(cellular_component:integral component of membrane); GO:0005886(cellular_component:plasma membrane); GO:0030246(molecular_function:carbohydrate binding); GO:0004674(molecular_function:protein serine/threonine kinase activity); GO:0005515(molecular_function:protein binding); GO:0004672(molecu…				COG0515(T:Signal transduction mechanisms); ENOG4110XTI(T:Signal transduction mechanisms)	COG0515(Serine Threonine protein kinase); ENOG4110XTI(serine threonine-protein kinase)	PF00069.28(Pkinase:Protein kinase domain); PF07714.20(PK_Tyr_Ser-Thr:Protein tyrosine and serine/threonine kinase); PF01453.27(B_lectin:D-mannose binding lectin); PF00954.23(S_locus_glycop:S-locus glycoprotein domain); PF08276.14(PAN_2:PAN-like domain); PF11883.11(DUF3403:Domain of unknown function (DUF3403)); PF00646.36(F-box:F-box domain)	sp|Q9SXB4|Y1130_ARATH(G-type lectin S-receptor-like serine/threonine-protein kinase At1g11300 OS=Arabidopsis thaliana OX=3702 GN=At1g11300 PE=2 SV=1)
MsG0080048025.01	MsG0080048025.01		732	0.564352	-0.825332	0.839711	1	no	down	0.390785	-1.35555	0.739734	1	no	down	1	0	1	1	no test	no test	RHN44518.1(putative tetratricopeptide-like helical domain, DYW domain-containing protein [Medicago truncatula])	GO:0016787(molecular_function:hydrolase activity); GO:0043231(cellular_component:intracellular membrane-bounded organelle); GO:0009451(biological_process:RNA modification); GO:0003723(molecular_function:RNA binding); GO:0005515(molecular_function:protein binding); GO:0008270(molecular_function:zinc ion binding)				ENOG410Z7Z7(S:Function unknown)	ENOG410Z7Z7(Pentatricopeptide repeat-containing protein)	PF20431.1(E_motif:E motif); PF01535.23(PPR:PPR repeat); PF13041.9(PPR_2:PPR repeat family)	sp|Q9STF3|PP265_ARATH(Pentatricopeptide repeat-containing protein At3g46790, chloroplastic OS=Arabidopsis thaliana OX=3702 GN=CRR2 PE=2 SV=1)
MsG0080048026.01	MsG0080048026.01		1189	1.81494	0.85992	0.0231426	0.137008	no	up	1.7065	0.771044	0.0406098	0.175951	no	up	0.936758	-0.0942509	0.776514	0.999405	no	down	XP_003621550.1(protein ROOT INITIATION DEFECTIVE 3 [Medicago truncatula])	GO:0005634(cellular_component:nucleus); GO:0097344(cellular_component:Rix1 complex); GO:0005656(cellular_component:nuclear pre-replicative complex); GO:0006261(biological_process:DNA-dependent DNA replication); GO:0005515(molecular_function:protein binding); GO:0006364(biological_process:rRNA processing)	K14829	IPI3		COG2319(S:Function unknown)	COG2319(wd repeat)	PF00400.35(WD40:WD domain, G-beta repeat); PF12894.10(ANAPC4_WD40:Anaphase-promoting complex subunit 4 WD40 domain); PF20426.1(NBCH_WD40:Neurobeachin beta propeller domain)	sp|Q9M3B4|RID3_ARATH(Protein ROOT INITIATION DEFECTIVE 3 OS=Arabidopsis thaliana OX=3702 GN=RID3 PE=1 SV=1)
MsG0080048027.01	MsG0080048027.01		447	0.659335	-0.600917	0.395223	0.692667	no	down	0.47149	-1.0847	0.120988	0.362518	no	down	0.71364	-0.486733	0.472734	0.999405	no	down	XP_013452513.1(probable carboxylesterase 120 [Medicago truncatula])	GO:0016787(molecular_function:hydrolase activity); GO:0008152(biological_process:metabolic process); GO:0080030(molecular_function:methyl indole-3-acetate esterase activity)				COG0657(I:Lipid transport and metabolism)	COG0657(alpha beta hydrolase fold-3 domain protein)	PF07859.16(Abhydrolase_3:alpha/beta hydrolase fold)	sp|Q9LVB8|CXE20_ARATH(Probable carboxylesterase 120 OS=Arabidopsis thaliana OX=3702 GN=CXE20 PE=2 SV=1)
MsG0080048028.01	MsG0080048028.01		690	0.0577801	-4.11328	0.156362	1	no	down	0.0398927	-4.64773	0.0975683	1	no	down	1	0	1	1	no test	no test	XP_003621289.2(7-deoxyloganetin glucosyltransferase isoform X2 [Medicago truncatula])	GO:0008152(biological_process:metabolic process); GO:0016021(cellular_component:integral component of membrane); GO:0080043(molecular_function:quercetin 3-O-glucosyltransferase activity); GO:0080044(molecular_function:quercetin 7-O-glucosyltransferase activity); GO:0016758(molecular_function:transferase activity, transferring hexosyl groups); GO:0008194(molecular_function:UDP-glycosyltransferase …						PF00201.21(UDPGT:UDP-glucoronosyl and UDP-glucosyl transferase)	sp|F8WLS6|UGT6_CATRO(7-deoxyloganetin glucosyltransferase OS=Catharanthus roseus OX=4058 GN=UGT85A23 PE=1 SV=1)
MsG0080048029.01	MsG0080048029.01		570	0.359283	-1.47681	0.0175761	0.113801	no	down	0.496412	-1.01039	0.0803139	0.278821	no	down	1.37378	0.458149	0.314513	0.98279	no	up	KEH31805.1(NAD(P)-binding rossmann-fold protein [Medicago truncatula])	GO:0102339(molecular_function:3-oxo-arachidoyl-CoA reductase activity); GO:0102340(molecular_function:3-oxo-behenoyl-CoA reductase activity); GO:0102342(molecular_function:3-oxo-cerotoyl-CoA reductase activity); GO:0102341(molecular_function:3-oxo-lignoceroyl-CoA reductase activity)	K11153	RDH12	map01240(Biosynthesis of cofactors)	COG1028(S:Function unknown)	COG1028(Dehydrogenase reductase)	PF00106.28(adh_short:short chain dehydrogenase); PF13561.9(adh_short_C2:Enoyl-(Acyl carrier protein) reductase); PF08659.13(KR:KR domain); PF01370.24(Epimerase:NAD dependent epimerase/dehydratase family)	sp|A0A078ISJ6|TC32B_BRANA(Short-chain dehydrogenase TIC 32 B, chloroplastic OS=Brassica napus OX=3708 GN=TIC32B PE=3 SV=1)
MsG0080048030.01	MsG0080048030.01		1190	1.6031	0.680864	0.722364	1	no	up	2.45384	1.29504	0.380931	1	no	up	1.52611	0.609857	0.665651	1	no	up	XP_024630106.1(FKBP12-interacting protein of 37 kDa isoform X2 [Medicago truncatula])	GO:0005634(cellular_component:nucleus); GO:0006397(biological_process:mRNA processing); GO:0000381(biological_process:regulation of alternative mRNA splicing, via spliceosome); GO:0008380(biological_process:RNA splicing); GO:0080009(biological_process:mRNA methylation)	K22824	WTAP		ENOG410XNW7(S:Function unknown)	ENOG410XNW7(wilms tumor 1 associated protein)	PF17098.8(Wtap:WTAP/Mum2p family)	sp|Q9ZSZ8|FIP37_ARATH(FKBP12-interacting protein of 37 kDa OS=Arabidopsis thaliana OX=3702 GN=FIP37 PE=1 SV=1)
MsG0080048031.01	MsG0080048031.01		600	1.94158	0.957234	0.63494	1	no	up	0.0916616	-3.44754	0.342331	1	no	down	0.046572	-4.42439	0.121524	1	no	down	XP_024642097.1(uncharacterized protein LOC112422724 [Medicago truncatula])	GO:0008483(molecular_function:transaminase activity); GO:0010073(biological_process:meristem maintenance); GO:0016787(molecular_function:hydrolase activity)						PF10536.12(PMD:Plant mobile domain)
MsG0080048032.01	MsG0080048032.01		651	1	0	1	1	no test	no test	1	0	1	1	no test	no test	1	0	1	1	no test	no test	XP_013457773.1(galactinol--sucrose galactosyltransferase [Medicago truncatula])	GO:0047274(molecular_function:galactinol-sucrose galactosyltransferase activity); GO:0047268(molecular_function:galactinol-raffinose galactosyltransferase activity); GO:0005975(biological_process:carbohydrate metabolic process); GO:0016757(molecular_function:transferase activity, transferring glycosyl groups)	K06617	E2.4.1.82	map00052(Galactose metabolism)	ENOG410YBU9(S:Function unknown); ENOG410YBUA(S:Function unknown)	ENOG410YBU9(raffinose synthase); ENOG410YBUA(galactinol--sucrose)	PF05691.15(Raffinose_syn:Raffinose synthase or seed imbibition protein Sip1)	sp|Q8VWN6|RFS_PEA(Galactinol--sucrose galactosyltransferase OS=Pisum sativum OX=3888 GN=RFS PE=1 SV=1)
MsG0080048033.01	MsG0080048033.01		873	1	0	1	1	no test	no test	1	0	1	1	no test	no test	1	0	1	1	no test	no test	ABE91952.1(Zinc finger, CCHC-type [Medicago truncatula])	GO:0008270(molecular_function:zinc ion binding); GO:0003676(molecular_function:nucleic acid binding)				ENOG410Y65V(S:Function unknown)	ENOG410Y65V(Retrotransposon protein)	PF14111.9(DUF4283:Domain of unknown function (DUF4283))
MsG0080048034.01	MsG0080048034.01		1299	1	0	1	1	no test	no test	1	0	1	1	no test	no test	1	0	1	1	no test	no test	GAU51664.1(hypothetical protein TSUD_268670 [Trifolium subterraneum])	GO:0003964(molecular_function:RNA-directed DNA polymerase activity); GO:0046872(molecular_function:metal ion binding); GO:0004523(molecular_function:RNA-DNA hybrid ribonuclease activity); GO:0003676(molecular_function:nucleic acid binding); GO:0008270(molecular_function:zinc ion binding)				ENOG410Y65V(S:Function unknown); ENOG4111MK6(S:Function unknown)	ENOG410Y65V(Retrotransposon protein); ENOG4111MK6(Retrotransposon protein)
MsG0080048035.01	MsG0080048035.01		1077	0.310575	-1.68699	7.95676e-06	0.000347912	yes	down	0.367467	-1.44431	0.00111574	0.0128403	yes	down	1.17704	0.235163	0.566663	0.999405	no	up	QDX01715.1(NAC domain-containing protein NAC51 [Medicago falcata])	GO:0006355(biological_process:regulation of transcription, DNA-templated); GO:0016021(cellular_component:integral component of membrane); GO:0003677(molecular_function:DNA binding)				ENOG410Y9QZ(S:Function unknown)	ENOG410Y9QZ(NAC domain-containing protein)	PF02365.18(NAM:No apical meristem (NAM) protein)	sp|Q9FLJ2|NC100_ARATH(NAC domain-containing protein 100 OS=Arabidopsis thaliana OX=3702 GN=NAC100 PE=2 SV=1)
MsG0080048036.01	MsG0080048036.01		1851	0.293932	-1.76645	0.01938	0.121914	no	down	0.286051	-1.80566	0.02513	0.126584	no	down	0.969493	-0.0446969	0.956775	0.999405	no	down	QDC33358.1(transcription factor WRKY1 [Medicago sativa])	GO:0003700(molecular_function:transcription factor activity, sequence-specific DNA binding); GO:0006355(biological_process:regulation of transcription, DNA-templated); GO:0005634(cellular_component:nucleus); GO:0043565(molecular_function:sequence-specific DNA binding)				ENOG410YE20(K:Transcription)	ENOG410YE20(WRKY transcription factor)	PF03106.18(WRKY:WRKY DNA -binding domain)	sp|A0A3Q7GFB5|WK72A_SOLLC(WRKY transcription factor 72A OS=Solanum lycopersicum OX=4081 GN=WRKY72A PE=2 SV=1)
MsG0080048037.01	MsG0080048037.01		1891	1.354	0.437223	0.236334	0.53698	no	up	1.09916	0.136403	0.720622	0.899023	no	up	0.807727	-0.308061	0.1402	0.910636	no	down	XP_003609016.1(delta-1-pyrroline-5-carboxylate dehydrogenase 12A1, mitochondrial [Medicago truncatula])	GO:0004029(molecular_function:aldehyde dehydrogenase (NAD) activity); GO:0016620(molecular_function:oxidoreductase activity, acting on the aldehyde or oxo group of donors, NAD or NADP as acceptor); GO:0005739(cellular_component:mitochondrion); GO:0003842(molecular_function:1-pyrroline-5-carboxylate dehydrogenase activity); GO:0010133(biological_process:proline catabolic process to glutamate); GO:…	K00294	E1.2.1.88	map00250(Alanine, aspartate and glutamate metabolism); map00330(Arginine and proline metabolism)	COG4230(E:Amino acid transport and metabolism)	COG4230(proline dehydrogenase, pyrroline-5-carboxylate dehydrogenase)	PF00171.25(Aldedh:Aldehyde dehydrogenase family)	sp|Q8VZC3|AL121_ARATH(Delta-1-pyrroline-5-carboxylate dehydrogenase 12A1, mitochondrial OS=Arabidopsis thaliana OX=3702 GN=ALDH12A1 PE=1 SV=1)
MsG0080048038.01	MsG0080048038.01		933	0.143778	-2.79809	0.00615446	0.0556553	no	down	0.0679799	-3.87875	0.0014349	0.0155348	yes	down	0.459304	-1.12248	0.637271	1	no	down	XP_003609015.1(senescence-specific cysteine protease SAG39 [Medicago truncatula])	GO:0051603(biological_process:proteolysis involved in cellular protein catabolic process); GO:0005615(cellular_component:extracellular space); GO:0016021(cellular_component:integral component of membrane); GO:0005764(cellular_component:lysosome); GO:0004197(molecular_function:cysteine-type endopeptidase activity); GO:0006508(biological_process:proteolysis); GO:0008234(molecular_function:cysteine-…				COG4870(O:Posttranslational modification, protein turnover, chaperones)	COG4870(cathepsin)	PF00112.26(Peptidase_C1:Papain family cysteine protease); PF08246.15(Inhibitor_I29:Cathepsin propeptide inhibitor domain (I29)); PF03051.18(Peptidase_C1_2:Peptidase C1-like family)	sp|A2XQE8|SAG39_ORYSI(Senescence-specific cysteine protease SAG39 OS=Oryza sativa subsp. indica OX=39946 GN=OsI_14861 PE=3 SV=1)
MsG0080048039.01	MsG0080048039.01		1038	1	0	1	1	no test	no test	1	0	1	1	no test	no test	1	0	1	1	no test	no test	AES91211.2(heat shock 70 kDa protein [Medicago truncatula])	GO:0005737(cellular_component:cytoplasm); GO:0031072(molecular_function:heat shock protein binding); GO:0044183(molecular_function:protein binding involved in protein folding); GO:0051082(molecular_function:unfolded protein binding); GO:0140662(deleted:old GO); GO:0051787(molecular_function:misfolded protein binding); GO:0034620(biological_process:cellular response to unfolded protein); GO:001688…	K09489	HSPA4		COG0443(O:Posttranslational modification, protein turnover, chaperones)	COG0443(Heat shock protein)	PF00012.23(HSP70:Hsp70 protein)	sp|Q9SKY8|HSP7H_ARATH(Heat shock 70 kDa protein 8 OS=Arabidopsis thaliana OX=3702 GN=HSP70-8 PE=1 SV=1)
MsG0080048040.01	MsG0080048040.01		1635	1.42774	0.513738	0.0800897	0.296604	no	up	1.43472	0.520771	0.113615	0.349059	no	up	1.00081	0.00117507	0.996882	0.9997	no	up	XP_003612449.1(60S ribosomal protein L4 [Medicago truncatula])	GO:0005840(cellular_component:ribosome); GO:0022625(cellular_component:cytosolic large ribosomal subunit); GO:1990904(cellular_component:ribonucleoprotein complex); GO:0003735(molecular_function:structural constituent of ribosome); GO:0003723(molecular_function:RNA binding); GO:0006412(biological_process:translation)	K02930	RP-L4e, RPL4	map03010(Ribosome)	COG0088(J:Translation, ribosomal structure and biogenesis)	COG0088(One of the primary rRNA binding proteins, this protein initially binds near the 5'-end of the 23S rRNA. It is important during the early stages of 50S assembly. It makes multiple contacts with different domains of the 23S rRNA in the assembled 50S subunit and ribosome (By similarity))	PF14374.9(Ribos_L4_asso_C:60S ribosomal protein L4 C-terminal domain); PF00573.25(Ribosomal_L4:Ribosomal protein L4/L1 family)	sp|Q9SF40|RL4A_ARATH(60S ribosomal protein L4-1 OS=Arabidopsis thaliana OX=3702 GN=RPL4A PE=1 SV=1)
MsG0080048041.01	MsG0080048041.01		1323	1	0	1	1	no test	no test	1	0	1	1	no test	no test	1	0	1	1	no test	no test	XP_003629154.2(ubiquitin domain-containing protein DSK2a [Medicago truncatula])	GO:0005829(cellular_component:cytosol); GO:0006511(biological_process:ubiquitin-dependent protein catabolic process); GO:0005515(molecular_function:protein binding); GO:0031593(molecular_function:polyubiquitin binding); GO:0005634(cellular_component:nucleus); GO:0016021(cellular_component:integral component of membrane)	K04523	UBQLN, DSK2	map04141(Protein processing in endoplasmic reticulum)	COG5272(O:Posttranslational modification, protein turnover, chaperones); ENOG410XT8C(O:Posttranslational modification, protein turnover, chaperones)	COG5272(ubiquitin); ENOG410XT8C(STI1)	PF00240.26(ubiquitin:Ubiquitin family); PF00627.34(UBA:UBA/TS-N domain)	sp|Q9SII8|DSK2B_ARATH(Ubiquitin domain-containing protein DSK2b OS=Arabidopsis thaliana OX=3702 GN=DSK2B PE=1 SV=1)
MsG0080048042.01	MsG0080048042.01		210	1	0	1	1	no test	no test	1	0	1	1	no test	no test	1	0	1	1	no test	no test	KAI5438929.1(hypothetical protein KIW84_024597 [Pisum sativum])	GO:0006887(biological_process:exocytosis); GO:0016021(cellular_component:integral component of membrane); GO:0016192(biological_process:vesicle-mediated transport); GO:0003824(molecular_function:catalytic activity); GO:0000149(molecular_function:SNARE binding); GO:0006906(biological_process:vesicle fusion); GO:0031201(cellular_component:SNARE complex); GO:0048278(biological_process:vesicle dockin…	K08486	STX1B_2_3	map04130(SNARE interactions in vesicular transport)	COG5074(U:Intracellular trafficking, secretion, and vesicular transport)	COG5074(SYNtaxin)	PF05739.22(SNARE:SNARE domain)	sp|Q9ZPV9|SY112_ARATH(Syntaxin-112 OS=Arabidopsis thaliana OX=3702 GN=SYP112 PE=2 SV=2)
MsG0080048043.01	MsG0080048043.01		642	0.480429	-1.05761	0.0719483	0.27791	no	down	0.502504	-0.992793	0.0459656	0.192089	no	down	1.03905	0.0552605	0.931353	0.999405	no	up	XP_003612044.2(syntaxin-112 [Medicago truncatula])	GO:0006887(biological_process:exocytosis); GO:0016021(cellular_component:integral component of membrane); GO:0016192(biological_process:vesicle-mediated transport); GO:0000149(molecular_function:SNARE binding); GO:0016020(cellular_component:membrane); GO:0031201(cellular_component:SNARE complex); GO:0006906(biological_process:vesicle fusion); GO:0048278(biological_process:vesicle docking); GO:001…	K08486;K02201	STX1B_2_3;E2.7.7.3B	map00770(Pantothenate and CoA biosynthesis); map04130(SNARE interactions in vesicular transport); map01240(Biosynthesis of cofactors)	COG5074(U:Intracellular trafficking, secretion, and vesicular transport)	COG5074(SYNtaxin)	PF00804.28(Syntaxin:Syntaxin); PF05739.22(SNARE:SNARE domain)	sp|Q9ZPV9|SY112_ARATH(Syntaxin-112 OS=Arabidopsis thaliana OX=3702 GN=SYP112 PE=2 SV=2)
MsG0080048044.01	MsG0080048044.01		255	1	0	1	1	no test	no test	1	0	1	1	no test	no test	1	0	1	1	no test	no test	KAI5438929.1(hypothetical protein KIW84_024597 [Pisum sativum])	GO:0006887(biological_process:exocytosis); GO:0016021(cellular_component:integral component of membrane); GO:0016192(biological_process:vesicle-mediated transport); GO:0003824(molecular_function:catalytic activity); GO:0000149(molecular_function:SNARE binding); GO:0016020(cellular_component:membrane); GO:0031201(cellular_component:SNARE complex); GO:0006906(biological_process:vesicle fusion); GO:…	K08486	STX1B_2_3	map04130(SNARE interactions in vesicular transport)	COG5074(U:Intracellular trafficking, secretion, and vesicular transport)	COG5074(SYNtaxin)	PF00804.28(Syntaxin:Syntaxin); PF05739.22(SNARE:SNARE domain)	sp|Q9ZPV9|SY112_ARATH(Syntaxin-112 OS=Arabidopsis thaliana OX=3702 GN=SYP112 PE=2 SV=2)
MsG0080048045.01	MsG0080048045.01		609	1	0	1	1	no test	no test	1	0	1	1	no test	no test	1	0	1	1	no test	no test	PNY16691.1(cysteine-rich receptor-like protein kinase [Trifolium pratense])	GO:0006281(biological_process:DNA repair); GO:0016310(biological_process:phosphorylation); GO:0004527(molecular_function:exonuclease activity); GO:0016301(molecular_function:kinase activity); GO:0003824(molecular_function:catalytic activity); GO:0003723(molecular_function:RNA binding); GO:0004519(molecular_function:endonuclease activity); GO:0003964(molecular_function:RNA-directed DNA polymerase …				ENOG410Y65V(S:Function unknown); ENOG4111K5V(S:Function unknown)	ENOG410Y65V(Retrotransposon protein); ENOG4111K5V(Reverse transcriptase (RNA-dependent DNA polymerase))
MsG0080048046.01	MsG0080048046.01		576	2.40836	1.26805	0.0187134	0.119084	no	up	2.86243	1.51724	0.00198716	0.0198791	yes	up	1.18408	0.243766	0.568331	0.999405	no	up	XP_003629148.1(dirigent protein 19 [Medicago truncatula])	GO:0048046(cellular_component:apoplast); GO:0009699(biological_process:phenylpropanoid biosynthetic process)				ENOG410YZ0B(S:Function unknown)	ENOG410YZ0B(Dirigent-like protein)	PF03018.17(Dirigent:Dirigent-like protein)	sp|Q9C523|DIR19_ARATH(Dirigent protein 19 OS=Arabidopsis thaliana OX=3702 GN=DIR19 PE=2 SV=1)
MsG0080048047.01	MsG0080048047.01		1083	1.17566	0.23347	0.584072	0.820922	no	up	1.03094	0.0439624	0.924622	0.977893	no	up	0.873423	-0.195248	0.663027	0.999405	no	down	XP_003629126.1(dehydrodolichyl diphosphate synthase CPT3 [Medicago truncatula])	GO:0016765(molecular_function:transferase activity, transferring alkyl or aryl (other than methyl) groups); GO:0004659(molecular_function:prenyltransferase activity); GO:0002094(molecular_function:polyprenyltransferase activity); GO:0005783(cellular_component:endoplasmic reticulum); GO:0016094(biological_process:polyprenol biosynthetic process)	K11778	DHDDS, RER2, SRT1	map00900(Terpenoid backbone biosynthesis)	COG0020(I:Lipid transport and metabolism)	COG0020(Catalyzes the condensation of isopentenyl diphosphate (IPP) with allylic pyrophosphates generating different type of terpenoids (By similarity))	PF01255.22(Prenyltransf:Putative undecaprenyl diphosphate synthase)	sp|K7WCI9|CPT3_SOLLC(Dehydrodolichyl diphosphate synthase CPT3 OS=Solanum lycopersicum OX=4081 GN=CPT3 PE=1 SV=1)
MsG0080048048.01	MsG0080048048.01		744	1.25939	0.332728	0.601191	0.830622	no	up	1.52779	0.611442	0.341192	0.646999	no	up	1.20761	0.272151	0.638837	0.999405	no	up	KEH40009.1(FKBP-type peptidyl-prolyl cis-trans isomerase [Medicago truncatula])	GO:0005737(cellular_component:cytoplasm); GO:0000413(biological_process:protein peptidyl-prolyl isomerization); GO:0061077(biological_process:chaperone-mediated protein folding); GO:0003755(molecular_function:peptidyl-prolyl cis-trans isomerase activity)	K09571	FKBP4_5		COG0545(O:Posttranslational modification, protein turnover, chaperones)	COG0545(Peptidyl-prolyl cis-trans isomerase)	PF00254.31(FKBP_C:FKBP-type peptidyl-prolyl cis-trans isomerase)	sp|Q38931|FKB62_ARATH(Peptidyl-prolyl cis-trans isomerase FKBP62 OS=Arabidopsis thaliana OX=3702 GN=FKBP62 PE=1 SV=2)
MsG0080048049.01	MsG0080048049.01		711	1	0	1	1	no test	no test	1	0	1	1	no test	no test	1	0	1	1	no test	no test	XP_013454600.1(F-box/LRR-repeat protein 2 [Medicago truncatula])	GO:0005737(cellular_component:cytoplasm); GO:0031146(biological_process:SCF-dependent proteasomal ubiquitin-dependent protein catabolic process); GO:0019005(cellular_component:SCF ubiquitin ligase complex)	K10268	FBXL2_20				PF12799.10(LRR_4:Leucine Rich repeats (2 copies))
MsG0080048050.01	MsG0080048050.01		327	0.103297	-3.27513	0.407303	1	no	down	2.08014	1.05668	0.698563	1	no	up	20.3109	4.34419	0.186751	1	no	up	KAH1250755.1(hypothetical protein GmHk_05G013835 [Glycine max])		K03231	EEF1A	map03013(Nucleocytoplasmic transport)	ENOG410Y42B(S:Function unknown)	ENOG410Y42B(-)
MsG0080048051.01	MsG0080048051.01		333	1.68244	0.750559	0.507145	0.776248	no	up	0.0868593	-3.52518	0.0622509	0.236453	no	down	0.0520763	-4.26323	0.000509629	0.0836838	no	down	KAH1250755.1(hypothetical protein GmHk_05G013835 [Glycine max])		K03231	EEF1A	map03013(Nucleocytoplasmic transport)	ENOG410Y42B(S:Function unknown)	ENOG410Y42B(-)
MsG0080048052.01	MsG0080048052.01		1131	0.640792	-0.642073	0.860612	1	no	down	2.00675	1.00486	0.656124	1	no	up	3.17993	1.669	0.53064	1	no	up	ONI21428.1(hypothetical protein PRUPE_2G065300 [Prunus persica])	GO:0016787(molecular_function:hydrolase activity); GO:0003724(molecular_function:RNA helicase activity); GO:0003676(molecular_function:nucleic acid binding); GO:0005524(molecular_function:ATP binding); GO:0003723(molecular_function:RNA binding)	K14442	DHX36, RHAU	map03018(RNA degradation)	COG1643(L:Replication, recombination and repair)	COG1643(helicase)	PF00271.34(Helicase_C:Helicase conserved C-terminal domain)	sp|F4IM84|DEXH5_ARATH(DExH-box ATP-dependent RNA helicase DExH5, mitochondrial OS=Arabidopsis thaliana OX=3702 GN=At2g01130 PE=3 SV=1)
MsG0080048053.01	MsG0080048053.01		318	1	0	1	1	no test	no test	1	0	1	1	no test	no test	1	0	1	1	no test	no test	KEH16322.1(hypothetical protein MTR_0230s0040 [Medicago truncatula])	GO:0009658(biological_process:chloroplast organization); GO:0009707(cellular_component:chloroplast outer membrane)
MsG0080048054.01	MsG0080048054.01		1959	0.539472	-0.890379	0.0841083	0.305358	no	down	0.686085	-0.54354	0.185747	0.466415	no	down	1.26408	0.33809	0.540675	0.999405	no	up	KAF9673431.1(hypothetical protein SADUNF_Sadunf10G0023800 [Salix dunnii])	GO:0030131(cellular_component:clathrin adaptor complex); GO:0031410(cellular_component:cytoplasmic vesicle); GO:0006886(biological_process:intracellular protein transport); GO:0016192(biological_process:vesicle-mediated transport)	K12393	AP1M		ENOG410XPFS(U:Intracellular trafficking, secretion, and vesicular transport)	ENOG410XPFS(Adaptor-related protein complex)	PF00928.24(Adap_comp_sub:Adaptor complexes medium subunit family); PF01217.23(Clat_adaptor_s:Clathrin adaptor complex small chain)	sp|O22715|AP1M2_ARATH(AP-1 complex subunit mu-2 OS=Arabidopsis thaliana OX=3702 GN=AP1M2 PE=1 SV=1)
MsG0080048055.01	MsG0080048055.01		351	2.14091	1.09822	0.787821	1	no	up	1	0	1	1	no	no change	0.354222	-1.49727	0.713666	1	no	down	RHN41632.1(hypothetical protein MtrunA17_Chr8g0368121 [Medicago truncatula])					ENOG410YPDW(S:Function unknown)	ENOG410YPDW(Poor homologous synapsis 1)		sp|Q45GQ7|POHS1_ARATH(Protein POOR HOMOLOGOUS SYNAPSIS 1 OS=Arabidopsis thaliana OX=3702 GN=PHS1 PE=1 SV=1)
MsG0080048056.01	MsG0080048056.01		828	1	0	1	1	no test	no test	1	0	1	1	no test	no test	1	0	1	1	no test	no test	KEH26187.1(hypothetical protein MTR_6g046375 [Medicago truncatula])
MsG0080048057.01	MsG0080048057.01		489	0.197402	-2.34079	2.69695e-07	2.11784e-05	yes	down	0.223081	-2.16436	5.62877e-06	0.000185027	yes	down	1.12713	0.172654	0.724139	0.999405	no	up	XP_003610008.1(probable xyloglucan endotransglucosylase/hydrolase protein 23 [Medicago truncatula])	GO:0042546(biological_process:cell wall biogenesis); GO:0005975(biological_process:carbohydrate metabolic process); GO:0048046(cellular_component:apoplast); GO:0071555(biological_process:cell wall organization); GO:0016762(molecular_function:xyloglucan:xyloglucosyl transferase activity); GO:0004553(molecular_function:hydrolase activity, hydrolyzing O-glycosyl compounds); GO:0010411(biological_pro…	K14504	TCH4	map04075(Plant hormone signal transduction)	COG2273(G:Carbohydrate transport and metabolism)	COG2273(hydrolase family 16)	PF00722.24(Glyco_hydro_16:Glycosyl hydrolases family 16)	sp|Q38907|XTH25_ARATH(Probable xyloglucan endotransglucosylase/hydrolase protein 25 OS=Arabidopsis thaliana OX=3702 GN=XTH25 PE=2 SV=2)
MsG0080048058.01	MsG0080048058.01		2841	1.11349	0.155093	0.588589	0.823611	no	up	0.964471	-0.0521905	0.847671	0.952264	no	down	0.863806	-0.21122	0.362494	0.990598	no	down	XP_039691221.1(probable glycosyltransferase STELLO1 [Medicago truncatula])	GO:0016740(molecular_function:transferase activity); GO:0016021(cellular_component:integral component of membrane)				ENOG410Z6Q8(S:Function unknown)	ENOG410Z6Q8(Protein of unknown function, DUF288)	PF03385.20(STELLO:STELLO glycosyltransferases)	sp|O22943|STL1_ARATH(Probable glycosyltransferase STELLO1 OS=Arabidopsis thaliana OX=3702 GN=STL1 PE=1 SV=1)
MsG0080048059.01	MsG0080048059.01		5001	2.29963	1.2014	0.00244746	0.0286098	yes	up	2.49331	1.31806	0.00191922	0.0193722	yes	up	1.08027	0.111396	0.70954	0.999405	no	up	XP_039691220.1(magnesium-chelatase subunit ChlH, chloroplastic [Medicago truncatula])	GO:0015995(biological_process:chlorophyll biosynthetic process); GO:0016851(molecular_function:magnesium chelatase activity); GO:0009058(biological_process:biosynthetic process); GO:0015979(biological_process:photosynthesis); GO:0005524(molecular_function:ATP binding); GO:0009507(cellular_component:chloroplast)	K03403	chlH, bchH	map00860(Porphyrin metabolism)	COG1429(H:Coenzyme transport and metabolism)	COG1429(cobaltochelatase, cobn subunit)	PF02514.19(CobN-Mg_chel:CobN/Magnesium Chelatase); PF11965.11(DUF3479:Domain of unknown function (DUF3479))	sp|Q9FNB0|CHLH_ARATH(Magnesium-chelatase subunit ChlH, chloroplastic OS=Arabidopsis thaliana OX=3702 GN=CHLH PE=1 SV=1)
MsG0080048060.01	MsG0080048060.01		657	1	0	1	1	no test	no test	1	0	1	1	no test	no test	1	0	1	1	no test	no test	RHN65855.1(hypothetical protein MtrunA17_Chr3g0084481 [Medicago truncatula])	GO:0003964(molecular_function:RNA-directed DNA polymerase activity); GO:0015074(biological_process:DNA integration); GO:0008270(molecular_function:zinc ion binding); GO:0003676(molecular_function:nucleic acid binding)						PF14223.9(Retrotran_gag_2:gag-polypeptide of LTR copia-type)
MsG0080048061.01	MsG0080048061.01		1224	1	0	1	1	no test	no test	1	0	1	1	no test	no test	1	0	1	1	no test	no test	RHN45120.1(putative transcription factor interactor and regulator CCHC(Zn) family [Medicago truncatula])	GO:0003964(molecular_function:RNA-directed DNA polymerase activity); GO:0015074(biological_process:DNA integration); GO:0008270(molecular_function:zinc ion binding); GO:0003676(molecular_function:nucleic acid binding)	K00979	kdsB	map01250(Biosynthesis of nucleotide sugars)			PF00098.26(zf-CCHC:Zinc knuckle)
MsG0080048062.01	MsG0080048062.01		360	1	0	1	1	no test	no test	1	0	1	1	no test	no test	1	0	1	1	no test	no test	RHN77747.1(putative nucleotidyltransferase, Ribonuclease H [Medicago truncatula])	GO:0006310(biological_process:DNA recombination); GO:0005634(cellular_component:nucleus); GO:0004523(molecular_function:RNA-DNA hybrid ribonuclease activity); GO:0003887(molecular_function:DNA-directed DNA polymerase activity); GO:0015074(biological_process:DNA integration); GO:0004190(molecular_function:aspartic-type endopeptidase activity); GO:0003723(molecular_function:RNA binding); GO:0003676…
MsG0080048063.01	MsG0080048063.01		621	0.564352	-0.825332	0.839711	1	no	down	0.761136	-0.393773	0.923122	1	no	down	1.34376	0.426279	0.916798	1	no	up	RHN52286.1(putative aspartic peptidase domain-containing protein [Medicago truncatula])	GO:0006508(biological_process:proteolysis); GO:0008233(molecular_function:peptidase activity); GO:0004190(molecular_function:aspartic-type endopeptidase activity)						PF09668.13(Asp_protease:Aspartyl protease); PF13650.9(Asp_protease_2:Aspartyl protease); PF13975.9(gag-asp_proteas:gag-polyprotein putative aspartyl protease)	sp|P40087|DDI1_YEAST(DNA damage-inducible protein 1 OS=Saccharomyces cerevisiae (strain ATCC 204508 / S288c) OX=559292 GN=DDI1 PE=1 SV=1)
MsG0080048064.01	MsG0080048064.01		759	5.82847	2.54312	0.524611	1	no	up	2.80263	1.48678	0.712572	1	no	up	0.479196	-1.06131	0.772681	1	no	down	KAE9620733.1(putative RNA-directed DNA polymerase [Lupinus albus])	GO:0003964(molecular_function:RNA-directed DNA polymerase activity); GO:0003887(molecular_function:DNA-directed DNA polymerase activity); GO:0008270(molecular_function:zinc ion binding); GO:0003676(molecular_function:nucleic acid binding); GO:0015074(biological_process:DNA integration)						PF14223.9(Retrotran_gag_2:gag-polypeptide of LTR copia-type); PF00098.26(zf-CCHC:Zinc knuckle)
MsG0080048065.01	MsG0080048065.01		1258	1.02794	0.03976	0.946574	0.98466	no	up	1.3062	0.385375	0.496266	0.774192	no	up	1.26594	0.340214	0.414735	0.999405	no	up	XP_013459094.1(pentatricopeptide repeat-containing protein At4g18975, chloroplastic isoform X1 [Medicago truncatula])	GO:0005515(molecular_function:protein binding)				ENOG410YABS(S:Function unknown)	ENOG410YABS(Pentatricopeptide repeat-containing protein)		sp|Q2V3H0|PP322_ARATH(Pentatricopeptide repeat-containing protein At4g18975, chloroplastic OS=Arabidopsis thaliana OX=3702 GN=At4g18975 PE=2 SV=2)
MsG0080048066.01	MsG0080048066.01		1407	2.14091	1.09822	0.787821	1	no	up	2.80263	1.48678	0.712572	1	no	up	1.29681	0.374965	0.925987	1	no	up	AES59204.1(OTU-like cysteine protease [Medicago truncatula])	GO:0006508(biological_process:proteolysis); GO:0008233(molecular_function:peptidase activity); GO:0005634(cellular_component:nucleus); GO:0008270(molecular_function:zinc ion binding); GO:0006355(biological_process:regulation of transcription, DNA-templated)
MsG0080048067.01	MsG0080048067.01		477	1	0	1	1	no test	no test	1	0	1	1	no test	no test	1	0	1	1	no test	no test	KEH34641.1(hypothetical protein MTR_3g467720 [Medicago truncatula])	GO:0005634(cellular_component:nucleus); GO:0036086(biological_process:positive regulation of transcription from RNA polymerase II promoter in response to iron ion starvation); GO:0006355(biological_process:regulation of transcription, DNA-templated); GO:0008270(molecular_function:zinc ion binding); GO:0003677(molecular_function:DNA binding); GO:0000981(molecular_function:RNA polymerase II transcr…
MsG0080048068.01	MsG0080048068.01		513	0.178855	-2.48314	0.533239	1	no	down	0.124175	-3.00956	0.450177	1	no	down	1	0	1	1	no test	no test	XP_039687698.1(serine carboxypeptidase-like 18 isoform X4 [Medicago truncatula])	GO:0006508(biological_process:proteolysis); GO:0019748(biological_process:secondary metabolic process); GO:0016747(molecular_function:transferase activity, transferring acyl groups other than amino-acyl groups); GO:0004185(molecular_function:serine-type carboxypeptidase activity)	K16296	SCPL-I		COG2939(E:Amino acid transport and metabolism)	COG2939(carboxy-peptidase)	PF00450.25(Peptidase_S10:Serine carboxypeptidase)	sp|Q9CAU4|SCP4_ARATH(Serine carboxypeptidase-like 4 OS=Arabidopsis thaliana OX=3702 GN=SCPL4 PE=2 SV=1)
MsG0080048069.01	MsG0080048069.01		222	1.92778	0.946942	0.0762615	0.287829	no	up	2.26684	1.18069	0.0385486	0.169932	no	up	1.17171	0.228618	0.594721	0.999405	no	up	XP_024633802.1(serine carboxypeptidase-like 18 isoform X3 [Medicago truncatula])	GO:0006508(biological_process:proteolysis); GO:0019748(biological_process:secondary metabolic process); GO:0016747(molecular_function:transferase activity, transferring acyl groups other than amino-acyl groups); GO:0004185(molecular_function:serine-type carboxypeptidase activity)	K16296	SCPL-I		COG2939(E:Amino acid transport and metabolism)	COG2939(carboxy-peptidase)	PF00450.25(Peptidase_S10:Serine carboxypeptidase)	sp|Q9C7Z9|SCP18_ARATH(Serine carboxypeptidase-like 18 OS=Arabidopsis thaliana OX=3702 GN=SCPL18 PE=2 SV=2)
MsG0080048070.01	MsG0080048070.01		390	1	0	1	1	no test	no test	1	0	1	1	no test	no test	1	0	1	1	no test	no test	KAI5388813.1(hypothetical protein KIW84_074467 [Pisum sativum])	GO:0080019(molecular_function:fatty-acyl-CoA reductase (alcohol-forming) activity); GO:0006629(biological_process:lipid metabolic process); GO:0016021(cellular_component:integral component of membrane); GO:0102965(molecular_function:alcohol-forming fatty acyl-CoA reductase activity); GO:0035336(biological_process:long-chain fatty-acyl-CoA metabolic process); GO:0010345(biological_process:suberin …	K13356	FAR	map04146(Peroxisome); map00073(Cutin, suberine and wax biosynthesis)	ENOG410XS7R(S:Function unknown)	ENOG410XS7R(fatty-acyl-CoA reductase (alcohol-forming) activity)	PF07993.15(NAD_binding_4:Male sterility protein)	sp|Q1PEI6|FACR8_ARATH(Fatty acyl-CoA reductase 8 OS=Arabidopsis thaliana OX=3702 GN=FAR8 PE=1 SV=1)
MsG0080048071.01	MsG0080048071.01		1248	0.258335	-1.95268	0.278697	1	no	down	1.31975	0.400263	0.752164	0.912097	no	up	5.04904	2.33601	0.0855176	0.836514	no	up	XP_039689686.1(fatty acyl-CoA reductase 1 isoform X2 [Medicago truncatula])	GO:0080019(molecular_function:fatty-acyl-CoA reductase (alcohol-forming) activity); GO:0043231(cellular_component:intracellular membrane-bounded organelle); GO:0016021(cellular_component:integral component of membrane); GO:0102965(molecular_function:alcohol-forming fatty acyl-CoA reductase activity); GO:0035336(biological_process:long-chain fatty-acyl-CoA metabolic process); GO:0010345(biological…	K13356	FAR	map04146(Peroxisome); map00073(Cutin, suberine and wax biosynthesis)	ENOG410XS7R(S:Function unknown)	ENOG410XS7R(fatty-acyl-CoA reductase (alcohol-forming) activity)	PF07993.15(NAD_binding_4:Male sterility protein); PF03015.22(Sterile:Male sterility protein); PF01370.24(Epimerase:NAD dependent epimerase/dehydratase family); PF01073.22(3Beta_HSD:3-beta hydroxysteroid dehydrogenase/isomerase family); PF02719.18(Polysacc_synt_2:Polysaccharide biosynthesis protein); PF16363.8(GDP_Man_Dehyd:GDP-mannose 4,6 dehydratase)	sp|Q39152|FACR1_ARATH(Fatty acyl-CoA reductase 1 OS=Arabidopsis thaliana OX=3702 GN=FAR1 PE=1 SV=1)
MsG0080048072.01	MsG0080048072.01		1180	1.02673	0.0380583	0.962906	0.98967	no	up	1.10251	0.14079	0.876681	0.962209	no	up	1.07395	0.102931	0.886094	0.999405	no	up	XP_003607957.1(protein DJ-1 homolog C [Medicago truncatula])	GO:0005737(cellular_component:cytoplasm); GO:0006541(biological_process:glutamine metabolic process); GO:0009658(biological_process:chloroplast organization); GO:0016740(molecular_function:transferase activity); GO:1903189(biological_process:glyoxal metabolic process); GO:0009507(cellular_component:chloroplast)				COG0693(S:Function unknown)	COG0693(PfpI family)	PF01965.27(DJ-1_PfpI:DJ-1/PfpI family)	sp|Q8VY09|DJ1C_ARATH(Protein DJ-1 homolog C OS=Arabidopsis thaliana OX=3702 GN=DJ1C PE=2 SV=1)
MsG0080048073.01	MsG0080048073.01		954	1.03962	0.0560626	0.875055	0.959324	no	up	1.90806	0.932107	0.0112513	0.0716319	no	up	1.82747	0.869848	0.0240003	0.577967	no	up	XP_003607958.1(ABSCISIC ACID-INSENSITIVE 5-like protein 7 [Medicago truncatula])	GO:0003700(molecular_function:transcription factor activity, sequence-specific DNA binding); GO:0006355(biological_process:regulation of transcription, DNA-templated); GO:0005634(cellular_component:nucleus); GO:0045893(biological_process:positive regulation of transcription, DNA-templated)	K14432	ABF	map04075(Plant hormone signal transduction)	ENOG410YB2M(K:Transcription); ENOG410ZM39(K:Transcription)	ENOG410YB2M(Transcription factor); ENOG410ZM39(Abscisic acid-insensitive 5-like protein)	PF00170.24(bZIP_1:bZIP transcription factor); PF07716.18(bZIP_2:Basic region leucine zipper)	sp|Q9M7Q4|AI5L5_ARATH(ABSCISIC ACID-INSENSITIVE 5-like protein 5 OS=Arabidopsis thaliana OX=3702 GN=ABF2 PE=1 SV=1)
MsG0080048074.01	MsG0080048074.01		312	4.40468	2.13904	0.595183	1	no	up	2.7906	1.48058	0.713756	1	no	up	0.635214	-0.654685	0.842831	1	no	down	RHN62193.1(hypothetical protein MtrunA17_Chr4g0044791 [Medicago truncatula])					ENOG410Z7Z7(S:Function unknown)	ENOG410Z7Z7(Pentatricopeptide repeat-containing protein)	PF07939.14(DUF1685:Protein of unknown function (DUF1685))
MsG0080048075.01	MsG0080048075.01		993	1	0	1	1	no test	no test	1.48247	0.567999	0.889293	1	no	up	1.34376	0.426279	0.916798	1	no	up	GAU35153.1(hypothetical protein TSUD_217860 [Trifolium subterraneum])	GO:0015074(biological_process:DNA integration); GO:0008270(molecular_function:zinc ion binding); GO:0003676(molecular_function:nucleic acid binding)				COG2801(L:Replication, recombination and repair)	COG2801(Retrotransposon protein)	PF14223.9(Retrotran_gag_2:gag-polypeptide of LTR copia-type); PF03732.20(Retrotrans_gag:Retrotransposon gag protein)
MsG0080048076.01	MsG0080048076.01		531	1	0	1	1	no test	no test	1	0	1	1	no test	no test	1	0	1	1	no test	no test	XP_045827331.1(ATP-dependent DNA helicase PIF1-like, partial [Trifolium pratense])	GO:0006310(biological_process:DNA recombination); GO:0000723(biological_process:telomere maintenance); GO:0006281(biological_process:DNA repair); GO:0004386(molecular_function:helicase activity); GO:0016887(molecular_function:ATPase activity); GO:0003678(molecular_function:DNA helicase activity); GO:0005524(molecular_function:ATP binding)	K15255	PIF1				PF02689.17(Herpes_Helicase:Helicase)	sp|Q38CE9|PIF6_TRYB2(ATP-dependent DNA helicase PIF6 OS=Trypanosoma brucei brucei (strain 927/4 GUTat10.1) OX=185431 GN=PIF6 PE=3 SV=1)
MsG0080048077.01	MsG0080048077.01		270	1	0	1	1	no test	no test	1	0	1	1	no test	no test	1	0	1	1	no test	no test	PNX79135.1(ethylene-responsive transcription factor wri1-like protein, partial [Trifolium pratense])	GO:0003700(molecular_function:transcription factor activity, sequence-specific DNA binding); GO:0006355(biological_process:regulation of transcription, DNA-templated); GO:0005634(cellular_component:nucleus); GO:0003677(molecular_function:DNA binding)				ENOG410Y9IH(K:Transcription)	ENOG410Y9IH(Transcription factor)	PF00847.23(AP2:AP2 domain)	sp|Q6X5Y6|WRI1_ARATH(Ethylene-responsive transcription factor WRI1 OS=Arabidopsis thaliana OX=3702 GN=WRI1 PE=1 SV=1)
MsG0080048078.01	MsG0080048078.01		204	1	0	1	1	no	no change	1	0	1	1	no	no change	1	0	1	1	no test	no test	KEH17485.1(hypothetical protein MTR_0012s0240 [Medicago truncatula])
MsG0080048079.01	MsG0080048079.01		216	1	0	1	1	no test	no test	1	0	1	1	no test	no test	1	0	1	1	no test	no test	RHN77747.1(putative nucleotidyltransferase, Ribonuclease H [Medicago truncatula])	GO:0006310(biological_process:DNA recombination); GO:0005634(cellular_component:nucleus); GO:0004523(molecular_function:RNA-DNA hybrid ribonuclease activity); GO:0003887(molecular_function:DNA-directed DNA polymerase activity); GO:0015074(biological_process:DNA integration); GO:0004190(molecular_function:aspartic-type endopeptidase activity); GO:0003723(molecular_function:RNA binding); GO:0003964…
MsG0080048080.01	MsG0080048080.01		792	4.3233	2.11213	0.312958	1	no	up	1.62516	0.700582	0.72145	1	no	up	0.37193	-1.4269	0.299857	1	no	down	PNX61902.1(retrovirus-related Pol polyprotein from transposon TNT 1-94, partial [Trifolium pratense])	GO:0016021(cellular_component:integral component of membrane); GO:0004523(molecular_function:RNA-DNA hybrid ribonuclease activity); GO:0030244(biological_process:cellulose biosynthetic process); GO:0015074(biological_process:DNA integration); GO:0016760(molecular_function:cellulose synthase (UDP-forming) activity); GO:0008270(molecular_function:zinc ion binding); GO:0003676(molecular_function:nuc…				ENOG410XS4D(S:Function unknown); ENOG4111WQF(S:Function unknown)	ENOG410XS4D(Retrotransposon protein); ENOG4111WQF(-)	PF07727.17(RVT_2:Reverse transcriptase (RNA-dependent DNA polymerase))	sp|P10978|POLX_TOBAC(Retrovirus-related Pol polyprotein from transposon TNT 1-94 OS=Nicotiana tabacum OX=4097 PE=2 SV=1)
MsG0080048081.01	MsG0080048081.01		228	1	0	1	1	no	no change	1	0	1	1	no	no change	1	0	1	1	no test	no test	KEH33597.1(hypothetical protein MTR_3g448730 [Medicago truncatula])	GO:0052924(molecular_function:all-trans-nonaprenyl-diphosphate synthase (geranylgeranyl-diphosphate specific) activity); GO:0052923(molecular_function:all-trans-nonaprenyl-diphosphate synthase (geranyl-diphosphate specific) activity); GO:0015074(biological_process:DNA integration); GO:0008270(molecular_function:zinc ion binding); GO:0003676(molecular_function:nucleic acid binding); GO:0003964(mol…				COG2801(L:Replication, recombination and repair)	COG2801(Retrotransposon protein)		sp|P10978|POLX_TOBAC(Retrovirus-related Pol polyprotein from transposon TNT 1-94 OS=Nicotiana tabacum OX=4097 PE=2 SV=1)
MsG0080048082.01	MsG0080048082.01		621	1	0	1	1	no test	no test	1	0	1	1	no test	no test	1	0	1	1	no test	no test	XP_039690611.1(uncharacterized protein LOC112422089 [Medicago truncatula])	GO:0006508(biological_process:proteolysis); GO:0008233(molecular_function:peptidase activity)						PF13650.9(Asp_protease_2:Aspartyl protease); PF09668.13(Asp_protease:Aspartyl protease)
MsG0080048083.01	MsG0080048083.01		1086	1	0	1	1	no test	no test	1	0	1	1	no test	no test	1	0	1	1	no test	no test	RHN66149.1(putative ribonuclease H-like domain, reverse transcriptase zinc-binding domain-containing protein [Medicago truncatula])	GO:0003964(molecular_function:RNA-directed DNA polymerase activity); GO:0016740(molecular_function:transferase activity); GO:0004523(molecular_function:RNA-DNA hybrid ribonuclease activity); GO:0003676(molecular_function:nucleic acid binding)						PF13456.9(RVT_3:Reverse transcriptase-like)
MsG0080048084.01	MsG0080048084.01		2757	1.02768	0.0393957	0.913953	0.973641	no	up	0.91744	-0.124314	0.714963	0.896232	no	down	0.889868	-0.168337	0.626017	0.999405	no	down	XP_024641806.1(protein YLS7 [Medicago truncatula])	GO:0016021(cellular_component:integral component of membrane); GO:0016413(molecular_function:O-acetyltransferase activity)				ENOG410XREJ(S:Function unknown)	ENOG410XREJ(Pfam:DUF231)	PF13839.9(PC-Esterase:GDSL/SGNH-like Acyl-Esterase family found in Pmr5 and Cas1p); PF14416.9(PMR5N:PMR5 N terminal Domain)	sp|Q9FHM0|TBL17_ARATH(Protein YLS7 OS=Arabidopsis thaliana OX=3702 GN=YLS7 PE=2 SV=1)
MsG0080048085.01	MsG0080048085.01		1350	1.32084	0.401457	0.410208	0.705657	no	up	1.44068	0.526749	0.310792	0.617419	no	up	1.08792	0.121572	0.73492	0.999405	no	up	KEH37351.1(mTERF protein [Medicago truncatula])	GO:0032502(biological_process:developmental process); GO:0009658(biological_process:chloroplast organization); GO:0006355(biological_process:regulation of transcription, DNA-templated); GO:0006353(biological_process:DNA-templated transcription, termination); GO:0003690(molecular_function:double-stranded DNA binding); GO:0009507(cellular_component:chloroplast)	K15032	MTERFD		ENOG410XT49(S:Function unknown)	ENOG410XT49(mitochondrial transcription termination)	PF02536.17(mTERF:mTERF)
MsG0080048086.01	MsG0080048086.01		2214	0.973623	-0.0385648	0.937846	0.981754	no	down	1.36927	0.453409	0.340465	0.646151	no	up	1.40196	0.487444	0.286313	0.977403	no	up	RHN73224.1(putative transcription regulator mTERF family [Medicago truncatula])	GO:0032502(biological_process:developmental process); GO:0016021(cellular_component:integral component of membrane); GO:0009658(biological_process:chloroplast organization); GO:0006355(biological_process:regulation of transcription, DNA-templated); GO:0006353(biological_process:DNA-templated transcription, termination); GO:0003690(molecular_function:double-stranded DNA binding); GO:0009507(cellul…	K15032	MTERFD		ENOG410XT49(S:Function unknown)	ENOG410XT49(mitochondrial transcription termination)	PF02536.17(mTERF:mTERF)
MsG0080048087.01	MsG0080048087.01		636	1.23945	0.309695	0.519903	0.783608	no	up	1.07822	0.108651	0.837414	0.948626	no	up	0.866753	-0.206308	0.666228	0.999405	no	down	XP_024631705.1(uncharacterized protein LOC25488213 [Medicago truncatula])	GO:0032502(biological_process:developmental process); GO:0009658(biological_process:chloroplast organization); GO:0006355(biological_process:regulation of transcription, DNA-templated); GO:0006353(biological_process:DNA-templated transcription, termination); GO:0003690(molecular_function:double-stranded DNA binding); GO:0009507(cellular_component:chloroplast)	K15032	MTERFD		ENOG410XT49(S:Function unknown)	ENOG410XT49(mitochondrial transcription termination)	PF02536.17(mTERF:mTERF)
MsG0080048088.01	MsG0080048088.01		411	0.278796	-1.84272	0.613773	1	no	down	0.0996054	-3.32763	0.401933	1	no	down	0.354222	-1.49727	0.713666	1	no	down	RHN60097.1(hypothetical protein MtrunA17_Chr4g0021661 [Medicago truncatula])
MsG0080048089.01	MsG0080048089.01		735	3.06169	1.61433	0.635	1	no	up	0.471021	-1.08614	0.788838	1	no	down	0.153158	-2.70691	0.427385	1	no	down	RHN77304.1(putative RNA-directed DNA polymerase [Medicago truncatula])	GO:0003964(molecular_function:RNA-directed DNA polymerase activity); GO:0015074(biological_process:DNA integration); GO:0008270(molecular_function:zinc ion binding); GO:0003676(molecular_function:nucleic acid binding); GO:0003899(molecular_function:DNA-directed RNA polymerase activity)				COG2801(L:Replication, recombination and repair)	COG2801(Retrotransposon protein)		sp|Q94HW2|POLR1_ARATH(Retrovirus-related Pol polyprotein from transposon RE1 OS=Arabidopsis thaliana OX=3702 GN=RE1 PE=2 SV=1)
MsG0080048090.01	MsG0080048090.01		903	0.253619	-1.97926	0.622264	1	no	down	0.175783	-2.50813	0.532454	1	no	down	1	0	1	1	no test	no test	RHN45120.1(putative transcription factor interactor and regulator CCHC(Zn) family [Medicago truncatula])	GO:0003964(molecular_function:RNA-directed DNA polymerase activity); GO:0015074(biological_process:DNA integration); GO:0008270(molecular_function:zinc ion binding); GO:0003676(molecular_function:nucleic acid binding)						PF14223.9(Retrotran_gag_2:gag-polypeptide of LTR copia-type); PF15770.8(DUF4699:Domain of unknown function (DUF4699)); PF13976.9(gag_pre-integrs:GAG-pre-integrase domain)
MsG0080048091.01	MsG0080048091.01		1875	0.348492	-1.5208	0.707643	1	no	down	0.241832	-2.04792	0.613576	1	no	down	1	0	1	1	no test	no test	ABD32582.1(Integrase, catalytic region; Zinc finger, CCHC-type; Peptidase aspartic, catalytic [Medicago truncatula])	GO:0003964(molecular_function:RNA-directed DNA polymerase activity); GO:0015074(biological_process:DNA integration); GO:0008270(molecular_function:zinc ion binding); GO:0003676(molecular_function:nucleic acid binding)	K00979	kdsB	map01250(Biosynthesis of nucleotide sugars)			PF14223.9(Retrotran_gag_2:gag-polypeptide of LTR copia-type); PF00098.26(zf-CCHC:Zinc knuckle); PF13696.9(zf-CCHC_2:Zinc knuckle)
MsG0080048092.01	MsG0080048092.01		522	1	0	1	1	no test	no test	1	0	1	1	no test	no test	1	0	1	1	no test	no test	RHN77304.1(putative RNA-directed DNA polymerase [Medicago truncatula])	GO:0003964(molecular_function:RNA-directed DNA polymerase activity); GO:0015074(biological_process:DNA integration); GO:0008270(molecular_function:zinc ion binding); GO:0003676(molecular_function:nucleic acid binding); GO:0003899(molecular_function:DNA-directed RNA polymerase activity)				COG2801(L:Replication, recombination and repair); ENOG410XS4D(S:Function unknown)	COG2801(Retrotransposon protein); ENOG410XS4D(Retrotransposon protein)		sp|Q94HW2|POLR1_ARATH(Retrovirus-related Pol polyprotein from transposon RE1 OS=Arabidopsis thaliana OX=3702 GN=RE1 PE=2 SV=1)
MsG0080048093.01	MsG0080048093.01		495	2.14091	1.09822	0.787821	1	no	up	2.80263	1.48678	0.712572	1	no	up	1.29681	0.374965	0.925987	1	no	up
MsG0080048094.01	MsG0080048094.01		1171	1.65591	0.727624	0.321432	0.628038	no	up	1.25949	0.332836	0.51941	0.790467	no	up	0.75845	-0.398875	0.555587	0.999405	no	down	XP_045793820.1(F-box/FBD/LRR-repeat protein At4g26340-like [Trifolium pratense])	GO:0005515(molecular_function:protein binding)						PF08387.13(FBD:FBD); PF00646.36(F-box:F-box domain); PF07723.16(LRR_2:Leucine Rich Repeat); PF12937.10(F-box-like:F-box-like)	sp|Q8H1R7|FDL27_ARATH(F-box/FBD/LRR-repeat protein At4g26340 OS=Arabidopsis thaliana OX=3702 GN=At4g26340 PE=2 SV=1)
MsG0080048095.01	MsG0080048095.01		501	0.564352	-0.825332	0.839711	1	no	down	0.390785	-1.35555	0.739734	1	no	down	1	0	1	1	no test	no test	KEH17475.1(hypothetical protein MTR_0013s0400 [Medicago truncatula])
MsG0080048096.01	MsG0080048096.01		1401	1	0	1	1	no test	no test	1	0	1	1	no test	no test	1	0	1	1	no test	no test	XP_027357789.1(elongation factor 1-gamma-like isoform X2 [Abrus precatorius])	GO:0042221(biological_process:response to chemical); GO:0003746(molecular_function:translation elongation factor activity); GO:0004364(molecular_function:glutathione transferase activity)	K03233	EEF1G		COG0625(O:Posttranslational modification, protein turnover, chaperones)	COG0625(glutathione Stransferase)	PF00043.28(GST_C:Glutathione S-transferase, C-terminal domain); PF13410.9(GST_C_2:Glutathione S-transferase, C-terminal domain)	sp|Q9ZRI7|EF1G1_ORYSJ(Elongation factor 1-gamma 1 OS=Oryza sativa subsp. japonica OX=39947 GN=Os02g0220600 PE=2 SV=1)
MsG0080048097.01	MsG0080048097.01		654	1	0	1	1	no test	no test	1	0	1	1	no test	no test	1	0	1	1	no test	no test	XP_039687844.1(uncharacterized protein LOC120579506 [Medicago truncatula])	GO:0003676(molecular_function:nucleic acid binding)						PF13650.9(Asp_protease_2:Aspartyl protease)
MsG0080048098.01	MsG0080048098.01		1038	1	0	1	1	no test	no test	1	0	1	1	no test	no test	1	0	1	1	no test	no test	GFY94686.1(translation elongation factor EF1B, gamma chain [Actinidia rufa])	GO:0004364(molecular_function:glutathione transferase activity); GO:0008270(molecular_function:zinc ion binding); GO:0003676(molecular_function:nucleic acid binding); GO:0042221(biological_process:response to chemical); GO:0003746(molecular_function:translation elongation factor activity); GO:0006414(biological_process:translational elongation)	K03233	EEF1G		COG0625(O:Posttranslational modification, protein turnover, chaperones)	COG0625(glutathione Stransferase)	PF00647.22(EF1G:Elongation factor 1 gamma, conserved domain); PF14223.9(Retrotran_gag_2:gag-polypeptide of LTR copia-type); PF00098.26(zf-CCHC:Zinc knuckle)	sp|Q9ZRI7|EF1G1_ORYSJ(Elongation factor 1-gamma 1 OS=Oryza sativa subsp. japonica OX=39947 GN=Os02g0220600 PE=2 SV=1)
MsG0080048099.01	MsG0080048099.01		1146	1.89808	0.924539	0.819344	1	no	up	1.43249	0.518525	0.892333	1	no	up	0.743878	-0.426862	0.900177	1	no	down	XP_003592901.1(elongation factor 1-gamma [Medicago truncatula])	GO:0004364(molecular_function:glutathione transferase activity); GO:0003746(molecular_function:translation elongation factor activity); GO:0006414(biological_process:translational elongation); GO:0042221(biological_process:response to chemical)	K03233	EEF1G		COG0625(O:Posttranslational modification, protein turnover, chaperones)	COG0625(glutathione Stransferase)	PF00043.28(GST_C:Glutathione S-transferase, C-terminal domain); PF13410.9(GST_C_2:Glutathione S-transferase, C-terminal domain)	sp|Q9FUM1|EF1G_PRUAV(Elongation factor 1-gamma OS=Prunus avium OX=42229 PE=2 SV=1)
MsG0080048100.01	MsG0080048100.01		537	2.14091	1.09822	0.787821	1	no	up	1.48247	0.567999	0.889293	1	no	up	0.689922	-0.535494	0.895591	1	no	down	XP_024632136.1(uncharacterized mitochondrial protein AtMg00310-like [Medicago truncatula])	GO:0003964(molecular_function:RNA-directed DNA polymerase activity); GO:0046872(molecular_function:metal ion binding); GO:0004523(molecular_function:RNA-DNA hybrid ribonuclease activity); GO:0003676(molecular_function:nucleic acid binding)							sp|P93295|M310_ARATH(Uncharacterized mitochondrial protein AtMg00310 OS=Arabidopsis thaliana OX=3702 GN=AtMg00310 PE=4 SV=1)
MsG0080048101.01	MsG0080048101.01		1350	2.14091	1.09822	0.787821	1	no	up	1	0	1	1	no test	no test	0.354222	-1.49727	0.713666	1	no	down	XP_013448575.1(F-box/kelch-repeat protein At3g23880 [Medicago truncatula])								sp|Q9LIR8|FBK67_ARATH(F-box/kelch-repeat protein At3g23880 OS=Arabidopsis thaliana OX=3702 GN=At3g23880 PE=2 SV=1)
MsG0080048102.01	MsG0080048102.01		267	3.69689	1.88631	0.641233	1	no	up	4.20692	2.07276	0.603705	1	no	up	1.11837	0.161404	0.965953	1	no	up	RHN56156.1(putative 7-deoxyloganetin glucosyltransferase [Medicago truncatula])	GO:0080043(molecular_function:quercetin 3-O-glucosyltransferase activity); GO:0008194(molecular_function:UDP-glycosyltransferase activity); GO:0080044(molecular_function:quercetin 7-O-glucosyltransferase activity)				COG1819(S:Function unknown)	COG1819(Transferase)		sp|F8WLS6|UGT6_CATRO(7-deoxyloganetin glucosyltransferase OS=Catharanthus roseus OX=4058 GN=UGT85A23 PE=1 SV=1)
MsG0080048103.01	MsG0080048103.01		861	2.14091	1.09822	0.787821	1	no	up	4.16919	2.05977	0.606046	1	no	up	1.95337	0.965965	0.808862	1	no	up	RHN56156.1(putative 7-deoxyloganetin glucosyltransferase [Medicago truncatula])	GO:0016758(molecular_function:transferase activity, transferring hexosyl groups); GO:0008194(molecular_function:UDP-glycosyltransferase activity); GO:0080044(molecular_function:quercetin 7-O-glucosyltransferase activity); GO:0008152(biological_process:metabolic process); GO:0080043(molecular_function:quercetin 3-O-glucosyltransferase activity)				COG1819(S:Function unknown)	COG1819(Transferase)	PF00201.21(UDPGT:UDP-glucoronosyl and UDP-glucosyl transferase)	sp|F8WLS6|UGT6_CATRO(7-deoxyloganetin glucosyltransferase OS=Catharanthus roseus OX=4058 GN=UGT85A23 PE=1 SV=1)
MsG0080048104.01	MsG0080048104.01		2118	2.14091	1.09822	0.787821	1	no	up	2.7906	1.48058	0.713756	1	no	up	1.29877	0.37715	0.920054	1	no	up	XP_013463822.1(uncharacterized protein LOC25488301 [Medicago truncatula])	GO:0006310(biological_process:DNA recombination); GO:0006468(biological_process:protein phosphorylation); GO:0006281(biological_process:DNA repair); GO:0016310(biological_process:phosphorylation); GO:0005634(cellular_component:nucleus); GO:0004672(molecular_function:protein kinase activity); GO:0004674(molecular_function:protein serine/threonine kinase activity); GO:0006260(biological_process:DNA…
MsG0080048105.01	MsG0080048105.01		243	1	0	1	1	no test	no test	1	0	1	1	no test	no test	1	0	1	1	no test	no test	RHN59775.1(putative transcription factor C2H2 family [Medicago truncatula])	GO:0046872(molecular_function:metal ion binding); GO:0004842(molecular_function:ubiquitin-protein transferase activity)	K19042	BOI		ENOG4111S1X(S:Function unknown)	ENOG4111S1X(protein binding zinc ion binding)	PF13920.9(zf-C3HC4_3:Zinc finger, C3HC4 type (RING finger))	sp|Q24307|DIAP2_DROME(Death-associated inhibitor of apoptosis 2 OS=Drosophila melanogaster OX=7227 GN=Diap2 PE=1 SV=3)
MsG0080048106.01	MsG0080048106.01		2288	0.591391	-0.757815	0.369099	0.670978	no	down	0.441012	-1.18111	0.176881	0.453221	no	down	0.742586	-0.429369	0.615305	0.999405	no	down	KEH19428.1(animal RPA1 domain protein, partial [Medicago truncatula])	GO:0006310(biological_process:DNA recombination); GO:0051321(biological_process:meiotic cell cycle); GO:0000724(biological_process:double-strand break repair via homologous recombination); GO:0043047(molecular_function:single-stranded telomeric DNA binding); GO:0005634(cellular_component:nucleus); GO:0006281(biological_process:DNA repair); GO:0006289(biological_process:nucleotide-excision repair)…						PF02721.17(DUF223:Domain of unknown function DUF223)
MsG0080048107.01	MsG0080048107.01		2249	2.01887	1.01355	0.152113	0.428744	no	up	2.47057	1.30485	0.0275204	0.13518	no	up	1.22023	0.287156	0.575327	0.999405	no	up	XP_013453403.1(uncharacterized protein LOC25494518 [Medicago truncatula])					ENOG410YA6Y(S:Function unknown)	ENOG410YA6Y(expressed protein)	PF12043.11(DUF3527:Domain of unknown function (DUF3527))
MsG0080048108.01	MsG0080048108.01		1954	1.01758	0.0251427	0.928809	0.978659	no	up	1.20265	0.266219	0.351621	0.656156	no	up	1.17675	0.234807	0.28244	0.976999	no	up	XP_003611082.1(uncharacterized protein LOC11442620 [Medicago truncatula])	GO:0003746(molecular_function:translation elongation factor activity); GO:0003682(molecular_function:chromatin binding); GO:0006351(biological_process:transcription, DNA-templated)				ENOG410XT07(S:Function unknown)	ENOG410XT07(BAH)	PF07500.17(TFIIS_M:Transcription factor S-II (TFIIS), central domain); PF01426.21(BAH:BAH domain)
MsG0080048109.01	MsG0080048109.01		306	1	0	1	1	no test	no test	1.48247	0.567999	0.889293	1	no	up	1.34376	0.426279	0.916798	1	no	up	ABN06136.1(RNA-directed DNA polymerase (Reverse transcriptase); Ribonuclease H [Medicago truncatula])	GO:0006310(biological_process:DNA recombination); GO:0005634(cellular_component:nucleus); GO:0004523(molecular_function:RNA-DNA hybrid ribonuclease activity); GO:0003887(molecular_function:DNA-directed DNA polymerase activity); GO:0015074(biological_process:DNA integration); GO:0030430(cellular_component:host cell cytoplasm); GO:0003723(molecular_function:RNA binding); GO:0003676(molecular_functi…
MsG0080048110.01	MsG0080048110.01		3210	1.13813	0.186661	0.675303	0.87235	no	up	0.599981	-0.73701	0.190672	0.4726	no	down	0.525608	-0.92794	0.0937701	0.842618	no	down	KEH22392.1(LRR receptor-like kinase family protein [Medicago truncatula])	GO:0009755(biological_process:hormone-mediated signaling pathway); GO:0006468(biological_process:protein phosphorylation); GO:0016021(cellular_component:integral component of membrane); GO:0005886(cellular_component:plasma membrane); GO:0005515(molecular_function:protein binding); GO:0004672(molecular_function:protein kinase activity); GO:0005524(molecular_function:ATP binding)				COG4886(S:Function unknown)	COG4886(leucine Rich Repeat)	PF00069.28(Pkinase:Protein kinase domain); PF07714.20(PK_Tyr_Ser-Thr:Protein tyrosine and serine/threonine kinase); PF13855.9(LRR_8:Leucine rich repeat); PF12799.10(LRR_4:Leucine Rich repeats (2 copies)); PF08263.15(LRRNT_2:Leucine rich repeat N-terminal domain)	sp|Q8VZG8|MIK2_ARATH(MDIS1-interacting receptor like kinase 2 OS=Arabidopsis thaliana OX=3702 GN=MIK2 PE=1 SV=3)
MsG0080048111.01	MsG0080048111.01		291	0.147781	-2.75847	0.473725	1	no	down	0.377797	-1.40432	0.628636	1	no	down	2.52579	1.33674	0.74052	1	no	up	KEH22392.1(LRR receptor-like kinase family protein [Medicago truncatula])	GO:0009755(biological_process:hormone-mediated signaling pathway); GO:0006468(biological_process:protein phosphorylation); GO:0016021(cellular_component:integral component of membrane); GO:0004672(molecular_function:protein kinase activity); GO:0005886(cellular_component:plasma membrane); GO:0005524(molecular_function:ATP binding)				COG0515(T:Signal transduction mechanisms); COG4886(S:Function unknown)	COG0515(Serine Threonine protein kinase); COG4886(leucine Rich Repeat)	PF07714.20(PK_Tyr_Ser-Thr:Protein tyrosine and serine/threonine kinase); PF00069.28(Pkinase:Protein kinase domain)	sp|Q8VZG8|MIK2_ARATH(MDIS1-interacting receptor like kinase 2 OS=Arabidopsis thaliana OX=3702 GN=MIK2 PE=1 SV=3)
MsG0080048112.01	MsG0080048112.01		1962	1	0	1	1	no test	no test	1	0	1	1	no test	no test	1	0	1	1	no test	no test	XP_039683285.1(MDIS1-interacting receptor like kinase 2-like [Medicago truncatula])	GO:0009755(biological_process:hormone-mediated signaling pathway); GO:0006468(biological_process:protein phosphorylation); GO:0016021(cellular_component:integral component of membrane); GO:0005886(cellular_component:plasma membrane); GO:0005515(molecular_function:protein binding); GO:0004672(molecular_function:protein kinase activity); GO:0005524(molecular_function:ATP binding)				COG4886(S:Function unknown)	COG4886(leucine Rich Repeat)	PF00069.28(Pkinase:Protein kinase domain); PF07714.20(PK_Tyr_Ser-Thr:Protein tyrosine and serine/threonine kinase); PF13855.9(LRR_8:Leucine rich repeat); PF12799.10(LRR_4:Leucine Rich repeats (2 copies)); PF08263.15(LRRNT_2:Leucine rich repeat N-terminal domain)	sp|Q8VZG8|MIK2_ARATH(MDIS1-interacting receptor like kinase 2 OS=Arabidopsis thaliana OX=3702 GN=MIK2 PE=1 SV=3)
MsG0080048113.01	MsG0080048113.01		682	0.643207	-0.636646	0.269004	0.571763	no	down	1.20569	0.269855	0.635536	0.858196	no	up	1.86283	0.897495	0.111625	0.876503	no	up	KAG9458732.1(hypothetical protein H6P81_003240 [Aristolochia fimbriata])	GO:0003735(molecular_function:structural constituent of ribosome); GO:0005840(cellular_component:ribosome); GO:1990904(cellular_component:ribonucleoprotein complex); GO:0003723(molecular_function:RNA binding); GO:0022625(cellular_component:cytosolic large ribosomal subunit)	K02908	RP-L30e, RPL30	map03010(Ribosome)	COG1911(J:Translation, ribosomal structure and biogenesis)	COG1911((ribosomal) protein)		sp|O49884|RL30_LUPLU(60S ribosomal protein L30 OS=Lupinus luteus OX=3873 GN=RPL30 PE=3 SV=1)
MsG0080048114.01	MsG0080048114.01		2184	1.18005	0.23885	0.923245	1	no	up	0.282452	-1.82392	0.582428	1	no	down	0.236167	-2.08212	0.515291	1	no	down	XP_039688599.1(uncharacterized protein LOC120579907 [Medicago truncatula])
MsG0080048115.01	MsG0080048115.01		1128	0.20636	-2.27677	0.340182	1	no	down	0.264033	-1.92121	0.355357	1	no	down	1.27772	0.35357	0.925274	1	no	up	XP_039687844.1(uncharacterized protein LOC120579506 [Medicago truncatula])	GO:0003676(molecular_function:nucleic acid binding)
MsG0080048116.01	MsG0080048116.01		312	1	0	1	1	no test	no test	1	0	1	1	no test	no test	1	0	1	1	no test	no test	RHN79211.1(hypothetical protein MtrunA17_Chr1g0174681 [Medicago truncatula])
MsG0080048117.01	MsG0080048117.01		564	0.640934	-0.641753	0.861613	1	no	down	0.443676	-1.17242	0.752394	1	no	down	0.689922	-0.535494	0.895591	1	no	down	AES58743.1(glycoside hydrolase family 17 protein [Medicago truncatula])	GO:0046658(cellular_component:anchored component of plasma membrane); GO:0042973(molecular_function:glucan endo-1,3-beta-D-glucosidase activity); GO:0005975(biological_process:carbohydrate metabolic process); GO:0004553(molecular_function:hydrolase activity, hydrolyzing O-glycosyl compounds)				ENOG410YCVQ(G:Carbohydrate transport and metabolism)	ENOG410YCVQ(glucan endo-1-3-beta-glucosidase)	PF00332.21(Glyco_hydro_17:Glycosyl hydrolases family 17)	sp|P52409|E13B_WHEAT(Glucan endo-1,3-beta-glucosidase OS=Triticum aestivum OX=4565 GN=GLC1 PE=2 SV=1)
MsG0080048118.01	MsG0080048118.01		876	1.17208	0.22907	0.954589	1	no	up	2.22021	1.1507	0.745705	1	no	up	1.86099	0.89607	0.795678	1	no	up	RHN51313.1(putative transcription factor interactor and regulator CCHC(Zn) family [Medicago truncatula])	GO:0016787(molecular_function:hydrolase activity); GO:0016779(molecular_function:nucleotidyltransferase activity); GO:0004523(molecular_function:RNA-DNA hybrid ribonuclease activity); GO:0015074(biological_process:DNA integration); GO:0004190(molecular_function:aspartic-type endopeptidase activity); GO:0008270(molecular_function:zinc ion binding); GO:0003676(molecular_function:nucleic acid bindin…						PF00098.26(zf-CCHC:Zinc knuckle); PF03732.20(Retrotrans_gag:Retrotransposon gag protein)
MsG0080048119.01	MsG0080048119.01		612	1	0	1	1	no test	no test	10.8056	3.4337	0.310609	1	no	up	9.79741	3.2924	0.327883	1	no	up	XP_003588493.3(reticulocalbin-2 [Medicago truncatula])	GO:0016021(cellular_component:integral component of membrane); GO:0005509(molecular_function:calcium ion binding); GO:0005783(cellular_component:endoplasmic reticulum)	K23901	CALU		ENOG410XRVE(S:Function unknown)	ENOG410XRVE(EF-hand calcium binding domain)
MsG0080048120.01	MsG0080048120.01		351	1	0	1	1	no test	no test	1	0	1	1	no test	no test	1	0	1	1	no test	no test	RHN51728.1(hypothetical protein MtrunA17_Chr6g0472091 [Medicago truncatula])	GO:0003964(molecular_function:RNA-directed DNA polymerase activity); GO:0015074(biological_process:DNA integration); GO:0008270(molecular_function:zinc ion binding); GO:0003676(molecular_function:nucleic acid binding)
MsG0080048121.01	MsG0080048121.01		1512	6.63571	2.73025	0.493385	1	no	up	2.69592	1.43078	0.723274	1	no	up	0.405791	-1.30119	0.716358	1	no	down	RHN51506.1(putative transcription factor interactor and regulator CCHC(Zn) family [Medicago truncatula])	GO:0003964(molecular_function:RNA-directed DNA polymerase activity); GO:0015074(biological_process:DNA integration); GO:0008270(molecular_function:zinc ion binding); GO:0003676(molecular_function:nucleic acid binding)	K00979	kdsB	map01250(Biosynthesis of nucleotide sugars)			PF14223.9(Retrotran_gag_2:gag-polypeptide of LTR copia-type); PF00098.26(zf-CCHC:Zinc knuckle); PF13696.9(zf-CCHC_2:Zinc knuckle)
MsG0080048122.01	MsG0080048122.01		324	0.699341	-0.515932	0.837569	1	no	down	0.0683305	-3.87133	0.232685	1	no	down	0.0983253	-3.34629	0.399899	1	no	down	ABD32582.1(Integrase, catalytic region; Zinc finger, CCHC-type; Peptidase aspartic, catalytic [Medicago truncatula])	GO:0015074(biological_process:DNA integration); GO:0016021(cellular_component:integral component of membrane); GO:0008270(molecular_function:zinc ion binding); GO:0003676(molecular_function:nucleic acid binding)
MsG0080048123.01	MsG0080048123.01		315	1.0992	0.136449	0.973324	1	no	up	1.4057	0.491285	0.89321	1	no	up	1.27776	0.353621	0.923671	1	no	up	XP_013469333.1(nodule lectin [Medicago truncatula])	GO:0043662(cellular_component:peribacteroid fluid); GO:0043661(cellular_component:peribacteroid membrane); GO:0016021(cellular_component:integral component of membrane); GO:0009610(biological_process:response to symbiotic fungus); GO:0030246(molecular_function:carbohydrate binding); GO:0044403(biological_process:symbiosis, encompassing mutualism through parasitism)						PF00139.22(Lectin_legB:Legume lectin domain)	sp|Q40987|LECR_PEA(Nodule lectin OS=Pisum sativum OX=3888 GN=NLEC1 PE=1 SV=1)
MsG0080048124.01	MsG0080048124.01		642	1	0	1	1	no test	no test	1	0	1	1	no test	no test	1	0	1	1	no test	no test	KAI5391519.1(hypothetical protein KIW84_076364 [Pisum sativum])	GO:0090158(biological_process:endoplasmic reticulum membrane organization); GO:0016021(cellular_component:integral component of membrane); GO:0061817(biological_process:endoplasmic reticulum-plasma membrane tethering); GO:0005886(cellular_component:plasma membrane); GO:0005789(cellular_component:endoplasmic reticulum membrane)				COG5066(U:Intracellular trafficking, secretion, and vesicular transport)	COG5066(Central component in molecular interactions underlying sperm crawling. Forms an extensive filament system that extends from sperm villipoda, along the leading edge of the pseudopod (By similarity))	PF00635.29(Motile_Sperm:MSP (Major sperm protein) domain)	sp|Q8VZ95|VAP11_ARATH(Vesicle-associated protein 1-1 OS=Arabidopsis thaliana OX=3702 GN=PVA11 PE=1 SV=1)
MsG0080048125.01	MsG0080048125.01		714	0.564352	-0.825332	0.839711	1	no	down	0.390785	-1.35555	0.739734	1	no	down	1	0	1	1	no test	no test	XP_045832887.1(vesicle-associated protein 1-4-like isoform X2 [Trifolium pratense])	GO:0090158(biological_process:endoplasmic reticulum membrane organization); GO:0016021(cellular_component:integral component of membrane); GO:0061817(biological_process:endoplasmic reticulum-plasma membrane tethering); GO:0005886(cellular_component:plasma membrane); GO:0005789(cellular_component:endoplasmic reticulum membrane)				COG5066(U:Intracellular trafficking, secretion, and vesicular transport)	COG5066(Central component in molecular interactions underlying sperm crawling. Forms an extensive filament system that extends from sperm villipoda, along the leading edge of the pseudopod (By similarity))	PF00635.29(Motile_Sperm:MSP (Major sperm protein) domain)	sp|Q9SHC8|VAP12_ARATH(Vesicle-associated protein 1-2 OS=Arabidopsis thaliana OX=3702 GN=PVA12 PE=1 SV=1)
MsG0080048126.01	MsG0080048126.01		1101	1	0	1	1	no test	no test	1	0	1	1	no test	no test	1	0	1	1	no test	no test	AES87399.1(agenet domain protein [Medicago truncatula])	GO:0016021(cellular_component:integral component of membrane); GO:0005515(molecular_function:protein binding)				COG5066(U:Intracellular trafficking, secretion, and vesicular transport)	COG5066(Central component in molecular interactions underlying sperm crawling. Forms an extensive filament system that extends from sperm villipoda, along the leading edge of the pseudopod (By similarity))	PF05641.15(Agenet:Agenet domain); PF00646.36(F-box:F-box domain); PF12937.10(F-box-like:F-box-like)	sp|Q9SHC8|VAP12_ARATH(Vesicle-associated protein 1-2 OS=Arabidopsis thaliana OX=3702 GN=PVA12 PE=1 SV=1)
MsG0080048127.01	MsG0080048127.01		1809	0.351197	-1.50965	0.639408	1	no	down	0.454745	-1.13687	0.670043	1	no	down	1.27544	0.350995	0.926279	1	no	up	AES87399.1(agenet domain protein [Medicago truncatula])	GO:0016021(cellular_component:integral component of membrane); GO:0005515(molecular_function:protein binding)				ENOG410ZS64(S:Function unknown)	ENOG410ZS64(-)	PF05641.15(Agenet:Agenet domain); PF00646.36(F-box:F-box domain); PF12937.10(F-box-like:F-box-like)	sp|Q8VZ95|VAP11_ARATH(Vesicle-associated protein 1-1 OS=Arabidopsis thaliana OX=3702 GN=PVA11 PE=1 SV=1)
MsG0080048128.01	MsG0080048128.01		1488	1.75333	0.810099	0.701053	1	no	up	0.81984	-0.286585	0.901711	1	no	down	0.461578	-1.11535	0.600677	1	no	down	AES87399.1(agenet domain protein [Medicago truncatula])	GO:0016021(cellular_component:integral component of membrane); GO:0005515(molecular_function:protein binding)				ENOG410ZS64(S:Function unknown)	ENOG410ZS64(-)	PF05641.15(Agenet:Agenet domain); PF00646.36(F-box:F-box domain); PF12937.10(F-box-like:F-box-like)	sp|Q500V5|AGDP1_ARATH(Protein AGENET DOMAIN (AGD)-CONTAINING P1 OS=Arabidopsis thaliana OX=3702 GN=AGDP1 PE=1 SV=1)
MsG0080048129.01	MsG0080048129.01		585	1	0	1	1	no test	no test	1	0	1	1	no test	no test	1	0	1	1	no test	no test	RHN45864.1(putative FBD domain, leucine-rich repeat domain, L domain-containing protein [Medicago truncatula])	GO:0006468(biological_process:protein phosphorylation); GO:0016021(cellular_component:integral component of membrane); GO:0030246(molecular_function:carbohydrate binding); GO:0004674(molecular_function:protein serine/threonine kinase activity); GO:0005886(cellular_component:plasma membrane); GO:0005524(molecular_function:ATP binding); GO:0048544(biological_process:recognition of pollen)				ENOG410ZS8E(S:Function unknown)	ENOG410ZS8E(f-box family)	PF08387.13(FBD:FBD)	sp|Q9FM87|FBD26_ARATH(Putative FBD-associated F-box protein At5g56440 OS=Arabidopsis thaliana OX=3702 GN=At5g56440 PE=4 SV=1)
MsG0080048130.01	MsG0080048130.01		168	0.564352	-0.825332	0.839711	1	no	down	0.390785	-1.35555	0.739734	1	no	down	1	0	1	1	no test	no test	AFK48307.1(unknown [Medicago truncatula])	GO:0006355(biological_process:regulation of transcription, DNA-templated); GO:0005634(cellular_component:nucleus); GO:0008270(molecular_function:zinc ion binding); GO:0003676(molecular_function:nucleic acid binding)				ENOG41114H3(S:Function unknown)	ENOG41114H3(FAR1 DNA-binding domain)	PF03101.18(FAR1:FAR1 DNA-binding domain)	sp|Q9M8J3|FRS7_ARATH(Protein FAR1-RELATED SEQUENCE 7 OS=Arabidopsis thaliana OX=3702 GN=FRS7 PE=2 SV=1)
MsG0080048131.01	MsG0080048131.01		276	1	0	1	1	no test	no test	1	0	1	1	no test	no test	1	0	1	1	no test	no test	ABN06136.1(RNA-directed DNA polymerase (Reverse transcriptase); Ribonuclease H [Medicago truncatula])	GO:0006310(biological_process:DNA recombination); GO:0005634(cellular_component:nucleus); GO:0004523(molecular_function:RNA-DNA hybrid ribonuclease activity); GO:0003887(molecular_function:DNA-directed DNA polymerase activity); GO:0015074(biological_process:DNA integration); GO:0030430(cellular_component:host cell cytoplasm); GO:0003723(molecular_function:RNA binding); GO:0003676(molecular_functi…
MsG0080048132.01	MsG0080048132.01		3717	1.14513	0.19551	0.861079	1	no	up	1.90929	0.933037	0.325108	0.632237	no	up	1.66977	0.739647	0.454319	0.999405	no	up	RHN58831.1(putative retrotransposon gag domain, aspartic peptidase domain-containing protein [Medicago truncatula])	GO:0006310(biological_process:DNA recombination); GO:0005634(cellular_component:nucleus); GO:0004523(molecular_function:RNA-DNA hybrid ribonuclease activity); GO:0003887(molecular_function:DNA-directed DNA polymerase activity); GO:0015074(biological_process:DNA integration); GO:0004190(molecular_function:aspartic-type endopeptidase activity); GO:0003723(molecular_function:RNA binding); GO:0003964…
MsG0080048133.01	MsG0080048133.01		1137	0.792373	-0.335749	0.740604	0.90255	no	down	0.295346	-1.75952	0.194252	0.477938	no	down	0.374446	-1.41717	0.32279	1	no	down	XP_013460448.1(taxadiene 5-alpha hydroxylase [Medicago truncatula])	GO:0016020(cellular_component:membrane); GO:0004497(molecular_function:monooxygenase activity); GO:0016125(biological_process:sterol metabolic process); GO:0020037(molecular_function:heme binding); GO:0016021(cellular_component:integral component of membrane); GO:0016705(molecular_function:oxidoreductase activity, acting on paired donors, with incorporation or reduction of molecular oxygen); GO:0…				COG2124(Q:Secondary metabolites biosynthesis, transport and catabolism)	COG2124(Cytochrome p450)	PF00067.25(p450:Cytochrome P450)	sp|Q50EK1|C16B1_PICSI(Cytochrome P450 716B1 OS=Picea sitchensis OX=3332 GN=CYP716B1 PE=2 SV=1)
MsG0080048134.01	MsG0080048134.01		438	0.210987	-2.24478	0.360158	1	no	down	0.952789	-0.0697706	0.969808	1	no	down	4.49584	2.16859	0.442116	1	no	up	KEH34483.1(cytochrome P450 family protein [Medicago truncatula])	GO:0004497(molecular_function:monooxygenase activity); GO:0016705(molecular_function:oxidoreductase activity, acting on paired donors, with incorporation or reduction of molecular oxygen); GO:0020037(molecular_function:heme binding); GO:0016020(cellular_component:membrane); GO:0016125(biological_process:sterol metabolic process); GO:0005506(molecular_function:iron ion binding); GO:0055114(biologi…				COG2124(Q:Secondary metabolites biosynthesis, transport and catabolism)	COG2124(Cytochrome p450)	PF00067.25(p450:Cytochrome P450)	sp|Q50EK0|C16B2_PICSI(Cytochrome P450 716B2 OS=Picea sitchensis OX=3332 GN=CYP716B2 PE=2 SV=1)
MsG0080048135.01	MsG0080048135.01		1038	0.868122	-0.20403	0.610918	0.837197	no	down	0.932695	-0.100522	0.786458	0.927067	no	down	1.06899	0.0962529	0.749543	0.999405	no	up	XP_013459291.1(protein EMBRYO DEFECTIVE 514 [Medicago truncatula])	GO:0005634(cellular_component:nucleus); GO:0016021(cellular_component:integral component of membrane); GO:0017126(biological_process:nucleologenesis)				ENOG411208S(S:Function unknown)	ENOG411208S(Encodes a protein DOMINO1 that belongs to a plant-specific gene family sharing a common motif present in the tomato DEFECTIVE CHLOROPLASTS AND LEAVES (LeDCL) protein. DOMINO1 is located in the nucleus. Arabidopsis embryos carrying the domino1 mutation grow slowly in comparison with wild type embryos and reach only the globular stage at desiccation. The primary defect of the mutation a…	PF11523.11(DUF3223:Protein of unknown function (DUF3223))	sp|Q8L557|EM514_ARATH(Protein EMBRYO DEFECTIVE 514 OS=Arabidopsis thaliana OX=3702 GN=EMB514 PE=1 SV=1)
MsG0080048136.01	MsG0080048136.01		636	1	0	1	1	no test	no test	1	0	1	1	no test	no test	1	0	1	1	no test	no test	XP_013459288.2(protein RKD2 [Medicago truncatula])	GO:0003700(molecular_function:transcription factor activity, sequence-specific DNA binding); GO:0005634(cellular_component:nucleus)				ENOG41120E0(S:Function unknown)	ENOG41120E0(RWP-RK domain-containing protein)	PF02042.18(RWP-RK:RWP-RK domain)	sp|Q9M9U9|RKD1_ARATH(Protein RKD1 OS=Arabidopsis thaliana OX=3702 GN=RKD1 PE=3 SV=1)
MsG0080048137.01	MsG0080048137.01		276	0.817367	-0.290944	0.553585	0.803697	no	down	0.763138	-0.389984	0.237267	0.534417	no	down	0.930012	-0.104679	0.825368	0.999405	no	down	XP_003600586.1(uncharacterized protein LOC11406721 [Medicago truncatula])	GO:0016021(cellular_component:integral component of membrane); GO:0006979(biological_process:response to oxidative stress)				ENOG410Y8SA(S:Function unknown)	ENOG410Y8SA(-)
MsG0080048138.01	MsG0080048138.01		681	1	0	1	1	no test	no test	1	0	1	1	no test	no test	1	0	1	1	no test	no test	XP_013466866.1(endoglucanase 15 [Medicago truncatula])	GO:0003824(molecular_function:catalytic activity); GO:0005975(biological_process:carbohydrate metabolic process); GO:0008810(molecular_function:cellulase activity); GO:0030245(biological_process:cellulose catabolic process); GO:0004553(molecular_function:hydrolase activity, hydrolyzing O-glycosyl compounds)	K01179	E3.2.1.4	map00500(Starch and sucrose metabolism)	ENOG410XPC9(G:Carbohydrate transport and metabolism)	ENOG410XPC9(hydrolase family)	PF00759.22(Glyco_hydro_9:Glycosyl hydrolase family 9)	sp|Q8S8Q4|GUN14_ARATH(Endoglucanase 14 OS=Arabidopsis thaliana OX=3702 GN=At2g44560 PE=2 SV=2)
MsG0080048139.01	MsG0080048139.01		462	1	0	1	1	no test	no test	1	0	1	1	no test	no test	1	0	1	1	no test	no test	XP_024626708.2(uncharacterized protein LOC112416648 [Medicago truncatula])	GO:0004523(molecular_function:RNA-DNA hybrid ribonuclease activity); GO:0003676(molecular_function:nucleic acid binding)						PF13456.9(RVT_3:Reverse transcriptase-like)
MsG0080048140.01	MsG0080048140.01		1476	1	0	1	1	no test	no test	1	0	1	1	no test	no test	1	0	1	1	no test	no test	XP_013466866.1(endoglucanase 15 [Medicago truncatula])	GO:0003824(molecular_function:catalytic activity); GO:0005975(biological_process:carbohydrate metabolic process); GO:0008810(molecular_function:cellulase activity); GO:0030245(biological_process:cellulose catabolic process); GO:0004553(molecular_function:hydrolase activity, hydrolyzing O-glycosyl compounds)	K01179	E3.2.1.4	map00500(Starch and sucrose metabolism)	ENOG410XPC9(G:Carbohydrate transport and metabolism)	ENOG410XPC9(hydrolase family)	PF00759.22(Glyco_hydro_9:Glycosyl hydrolase family 9)	sp|O80497|GUN15_ARATH(Endoglucanase 15 OS=Arabidopsis thaliana OX=3702 GN=At2g44570 PE=3 SV=1)
MsG0080048141.01	MsG0080048141.01		264	1	0	1	1	no test	no test	1	0	1	1	no	no change	1	0	1	1	no	no change	RHN60765.1(putative RNA-directed DNA polymerase [Medicago truncatula])	GO:0004805(molecular_function:trehalose-phosphatase activity); GO:0005992(biological_process:trehalose biosynthetic process); GO:0015074(biological_process:DNA integration); GO:0008270(molecular_function:zinc ion binding); GO:0003676(molecular_function:nucleic acid binding); GO:0003964(molecular_function:RNA-directed DNA polymerase activity); GO:0007165(biological_process:signal transduction)						PF00098.26(zf-CCHC:Zinc knuckle)
MsG0080048142.01	MsG0080048142.01		348	0.564352	-0.825332	0.839711	1	no	down	0.390785	-1.35555	0.739734	1	no	down	1	0	1	1	no test	no test	RHN60765.1(putative RNA-directed DNA polymerase [Medicago truncatula])	GO:0004805(molecular_function:trehalose-phosphatase activity); GO:0005992(biological_process:trehalose biosynthetic process); GO:0015074(biological_process:DNA integration); GO:0008270(molecular_function:zinc ion binding); GO:0003676(molecular_function:nucleic acid binding); GO:0003964(molecular_function:RNA-directed DNA polymerase activity); GO:0007165(biological_process:signal transduction)						PF00098.26(zf-CCHC:Zinc knuckle)
MsG0080048143.01	MsG0080048143.01		741	1	0	1	1	no test	no test	4.16919	2.05977	0.606046	1	no	up	3.80458	1.92774	0.629282	1	no	up	RHN60765.1(putative RNA-directed DNA polymerase [Medicago truncatula])	GO:0016787(molecular_function:hydrolase activity); GO:0004805(molecular_function:trehalose-phosphatase activity); GO:0005992(biological_process:trehalose biosynthetic process); GO:0015074(biological_process:DNA integration); GO:0008270(molecular_function:zinc ion binding); GO:0003676(molecular_function:nucleic acid binding); GO:0003964(molecular_function:RNA-directed DNA polymerase activity)						PF14223.9(Retrotran_gag_2:gag-polypeptide of LTR copia-type); PF00098.26(zf-CCHC:Zinc knuckle)	sp|P10978|POLX_TOBAC(Retrovirus-related Pol polyprotein from transposon TNT 1-94 OS=Nicotiana tabacum OX=4097 PE=2 SV=1)
MsG0080048144.01	MsG0080048144.01		294	1	0	1	1	no test	no test	1	0	1	1	no test	no test	1	0	1	1	no test	no test	AES87637.2(DUF4283 domain protein [Medicago truncatula])	GO:0003964(molecular_function:RNA-directed DNA polymerase activity); GO:0046872(molecular_function:metal ion binding); GO:0004523(molecular_function:RNA-DNA hybrid ribonuclease activity); GO:0003676(molecular_function:nucleic acid binding)						PF14111.9(DUF4283:Domain of unknown function (DUF4283))
MsG0080048145.01	MsG0080048145.01		318	0.473602	-1.07825	0.087484	0.311785	no	down	0.248224	-2.01029	0.0175483	0.0991243	no	down	0.523573	-0.933538	0.347043	0.988488	no	down	AET02871.1(albumin I [Medicago truncatula])	GO:0045735(molecular_function:nutrient reservoir activity); GO:0090729(molecular_function:toxin activity)						PF16720.8(Albumin_I_a:Albumin I chain a)	sp|P62927|ALB1B_PEA(Albumin-1 B OS=Pisum sativum OX=3888 PE=2 SV=1)
MsG0080048146.01	MsG0080048146.01		270	1	0	1	1	no test	no test	1	0	1	1	no test	no test	1	0	1	1	no test	no test	RHN51728.1(hypothetical protein MtrunA17_Chr6g0472091 [Medicago truncatula])	GO:0003964(molecular_function:RNA-directed DNA polymerase activity); GO:0015074(biological_process:DNA integration); GO:0008270(molecular_function:zinc ion binding); GO:0003676(molecular_function:nucleic acid binding)
MsG0080048147.01	MsG0080048147.01		177	1	0	1	1	no test	no test	1	0	1	1	no test	no test	1	0	1	1	no test	no test	PNY07662.1(hypothetical protein L195_g004164, partial [Trifolium pratense])		K21842	EFR3		ENOG410YJSK(S:Function unknown)	ENOG410YJSK(EFR3 homolog)
MsG0080048148.01	MsG0080048148.01		1779	0.658837	-0.602006	0.708924	0.887482	no	down	0.0345612	-4.8547	0.032135	1	no	down	0.0518315	-4.27003	0.0286334	1	no	down	ABE93038.1(N-6 Adenine-specific DNA methylase [Medicago truncatula])	GO:0003964(molecular_function:RNA-directed DNA polymerase activity); GO:0008168(molecular_function:methyltransferase activity); GO:0032259(biological_process:methylation)						PF14111.9(DUF4283:Domain of unknown function (DUF4283)); PF14392.9(zf-CCHC_4:Zinc knuckle)
MsG0080048149.01	MsG0080048149.01		606	0.103297	-3.27513	0.407303	1	no	down	0.0712603	-3.81076	0.33494	1	no	down	1	0	1	1	no test	no test	XP_013442727.1(kunitz type trypsin inhibitor 104 [Medicago truncatula])	GO:0005615(cellular_component:extracellular space); GO:0009610(biological_process:response to symbiotic fungus); GO:0036377(biological_process:arbuscular mycorrhizal association); GO:0048046(cellular_component:apoplast); GO:0005576(cellular_component:extracellular region); GO:0004866(molecular_function:endopeptidase inhibitor activity); GO:0004867(molecular_function:serine-type endopeptidase inhi…				ENOG410YHN1(O:Posttranslational modification, protein turnover, chaperones)	ENOG410YHN1(trypsin and protease inhibitor family protein Kunitz family protein)	PF00197.21(Kunitz_legume:Trypsin and protease inhibitor)	sp|A0A072TH68|KI104_MEDTR(Kunitz type trypsin inhibitor 104 OS=Medicago truncatula OX=3880 GN=KPI104 PE=1 SV=1)
MsG0080048150.01	MsG0080048150.01		816	1.04086	0.0577738	0.888647	0.964107	no	up	1.04701	0.0662799	0.878188	0.962877	no	up	1.00184	0.00264537	0.993114	0.99967	no	up	XP_003629993.1(basic blue protein [Medicago truncatula])	GO:0046658(cellular_component:anchored component of plasma membrane); GO:0009055(molecular_function:electron carrier activity)				ENOG410YPS7(S:Function unknown); ENOG4111D22(S:Function unknown)	ENOG410YPS7(Basic blue); ENOG4111D22(Plastocyanin-like domain)	PF02298.20(Cu_bind_like:Plastocyanin-like domain)	sp|Q8LG89|BABL_ARATH(Basic blue protein OS=Arabidopsis thaliana OX=3702 GN=ARPN PE=2 SV=2)
MsG0080048151.01	MsG0080048151.01		1329	0.854171	-0.227404	0.658051	0.862924	no	down	1.01444	0.0206781	0.970813	0.992156	no	up	1.18267	0.242048	0.574467	0.999405	no	up	XP_039685634.1(replication protein A 70 kDa DNA-binding subunit-like isoform X2 [Medicago truncatula])	GO:0006310(biological_process:DNA recombination); GO:0051321(biological_process:meiotic cell cycle); GO:0005840(cellular_component:ribosome); GO:0000724(biological_process:double-strand break repair via homologous recombination); GO:0043047(molecular_function:single-stranded telomeric DNA binding); GO:0005634(cellular_component:nucleus); GO:0006281(biological_process:DNA repair); GO:0006289(biolo…						PF08646.13(Rep_fac-A_C:Replication factor-A C terminal domain)
MsG0080048152.01	MsG0080048152.01		390	0.794255	-0.332326	0.487516	0.762295	no	down	1.01468	0.0210241	0.960088	0.989562	no	up	1.27211	0.347221	0.38915	0.998221	no	up	XP_045833663.1(uncharacterized protein LOC123924741 [Trifolium pratense])	GO:0015074(biological_process:DNA integration); GO:0008270(molecular_function:zinc ion binding); GO:0003676(molecular_function:nucleic acid binding)
MsG0080048153.01	MsG0080048153.01		1998	1.60272	0.680523	0.794828	1	no	up	1.70127	0.766611	0.76147	1	no	up	1.05869	0.0822807	0.967398	1	no	up	XP_013443507.1(GDSL esterase/lipase At2g03980 [Medicago truncatula])	GO:0016758(molecular_function:transferase activity, transferring hexosyl groups); GO:0004806(molecular_function:triglyceride lipase activity); GO:0016788(molecular_function:hydrolase activity, acting on ester bonds); GO:0008152(biological_process:metabolic process); GO:0008194(molecular_function:UDP-glycosyltransferase activity)				ENOG411152S(G:Carbohydrate transport and metabolism); COG1819(S:Function unknown)	ENOG411152S(GDSL-motif lipase hydrolase family protein); COG1819(Transferase)	PF00657.25(Lipase_GDSL:GDSL-like Lipase/Acylhydrolase); PF00201.21(UDPGT:UDP-glucoronosyl and UDP-glucosyl transferase)	sp|Q9SIF5|GDL32_ARATH(GDSL esterase/lipase At2g03980 OS=Arabidopsis thaliana OX=3702 GN=At2g03980 PE=2 SV=1)
MsG0080048154.01	MsG0080048154.01		993	1	0	1	1	no test	no test	1	0	1	1	no test	no test	1	0	1	1	no test	no test	XP_013443511.1(pectinesterase PPME1 [Medicago truncatula])	GO:0042545(biological_process:cell wall modification); GO:0005618(cellular_component:cell wall); GO:0052689(molecular_function:carboxylic ester hydrolase activity); GO:0030599(molecular_function:pectinesterase activity); GO:0045330(molecular_function:aspartyl esterase activity); GO:0045490(biological_process:pectin catabolic process)	K01051	E3.1.1.11	map00040(Pentose and glucuronate interconversions)	COG4677(G:Carbohydrate transport and metabolism)	COG4677(pectinesterase)	PF01095.22(Pectinesterase:Pectinesterase)	sp|Q84WM7|PPME1_ARATH(Pectinesterase PPME1 OS=Arabidopsis thaliana OX=3702 GN=PPME1 PE=1 SV=1)
MsG0080048155.01	MsG0080048155.01		411	1	0	1	1	no test	no test	1	0	1	1	no test	no test	1	0	1	1	no test	no test	KEH20190.1(carboxyl-terminal peptidase [Medicago truncatula])	GO:0016021(cellular_component:integral component of membrane)				ENOG4111S54(S:Function unknown)	ENOG4111S54(carboxyl-terminal peptidase)	PF03080.18(Neprosin:Neprosin)
MsG0080048156.01	MsG0080048156.01		1218	1.42307	0.509007	0.545667	0.799149	no	up	0.572493	-0.804671	0.392973	0.690888	no	down	0.402233	-1.3139	0.139732	0.909671	no	down	RHN45205.1(putative F-box domain, FBD domain, leucine-rich repeat domain, L domain-containing protein [Medicago truncatula])	GO:0005515(molecular_function:protein binding)				ENOG410ZS8E(S:Function unknown)	ENOG410ZS8E(f-box family)	PF08387.13(FBD:FBD); PF00646.36(F-box:F-box domain); PF12937.10(F-box-like:F-box-like)	sp|Q9FM94|FBD21_ARATH(FBD-associated F-box protein At5g56370 OS=Arabidopsis thaliana OX=3702 GN=At5g56370 PE=2 SV=1)
MsG0080048157.01	MsG0080048157.01		807	0.7143	-0.485398	0.794811	1	no	down	1.93281	0.950697	0.5228	1	no	up	2.73197	1.44994	0.319198	1	no	up	KEH22739.1(S-locus lectin kinase family protein [Medicago truncatula])	GO:0006468(biological_process:protein phosphorylation); GO:0016021(cellular_component:integral component of membrane); GO:0005886(cellular_component:plasma membrane); GO:0030246(molecular_function:carbohydrate binding); GO:0004674(molecular_function:protein serine/threonine kinase activity); GO:0004672(molecular_function:protein kinase activity); GO:0106310(deleted:old GO); GO:0005524(molecular_f…				COG0515(T:Signal transduction mechanisms); ENOG4110XTI(T:Signal transduction mechanisms)	COG0515(Serine Threonine protein kinase); ENOG4110XTI(serine threonine-protein kinase)	PF07714.20(PK_Tyr_Ser-Thr:Protein tyrosine and serine/threonine kinase); PF00069.28(Pkinase:Protein kinase domain)	sp|Q9SXB4|Y1130_ARATH(G-type lectin S-receptor-like serine/threonine-protein kinase At1g11300 OS=Arabidopsis thaliana OX=3702 GN=At1g11300 PE=2 SV=1)
MsG0080048158.01	MsG0080048158.01		2343	1.12996	0.176273	0.899296	1	no	up	0.0715244	-3.80542	0.0547991	1	no	down	0.0624739	-4.0006	0.0632519	1	no	down	XP_027186237.1(G-type lectin S-receptor-like serine/threonine-protein kinase At1g11300 [Cicer arietinum])	GO:0006468(biological_process:protein phosphorylation); GO:0016021(cellular_component:integral component of membrane); GO:0005886(cellular_component:plasma membrane); GO:0030246(molecular_function:carbohydrate binding); GO:0004674(molecular_function:protein serine/threonine kinase activity); GO:0004672(molecular_function:protein kinase activity); GO:0106310(deleted:old GO); GO:0005524(molecular_f…				COG0515(T:Signal transduction mechanisms); ENOG4110XTI(T:Signal transduction mechanisms)	COG0515(Serine Threonine protein kinase); ENOG4110XTI(serine threonine-protein kinase)	PF07714.20(PK_Tyr_Ser-Thr:Protein tyrosine and serine/threonine kinase); PF00069.28(Pkinase:Protein kinase domain); PF01453.27(B_lectin:D-mannose binding lectin); PF00954.23(S_locus_glycop:S-locus glycoprotein domain); PF08276.14(PAN_2:PAN-like domain); PF11883.11(DUF3403:Domain of unknown function (DUF3403))	sp|Q9SXB4|Y1130_ARATH(G-type lectin S-receptor-like serine/threonine-protein kinase At1g11300 OS=Arabidopsis thaliana OX=3702 GN=At1g11300 PE=2 SV=1)
MsG0080048159.01	MsG0080048159.01		7048	0.615849	-0.699351	0.115981	0.366901	no	down	0.732651	-0.448802	0.197678	0.482005	no	down	1.18299	0.242434	0.572914	0.999405	no	up	XP_045798109.1(uncharacterized protein LOC123892366 [Trifolium pratense])	GO:0006468(biological_process:protein phosphorylation); GO:0016021(cellular_component:integral component of membrane); GO:0030246(molecular_function:carbohydrate binding); GO:0004674(molecular_function:protein serine/threonine kinase activity); GO:0004672(molecular_function:protein kinase activity); GO:0005524(molecular_function:ATP binding); GO:0048544(biological_process:recognition of pollen)				COG0515(T:Signal transduction mechanisms)	COG0515(Serine Threonine protein kinase)	PF07714.20(PK_Tyr_Ser-Thr:Protein tyrosine and serine/threonine kinase); PF00069.28(Pkinase:Protein kinase domain); PF01453.27(B_lectin:D-mannose binding lectin); PF00954.23(S_locus_glycop:S-locus glycoprotein domain); PF08276.14(PAN_2:PAN-like domain); PF11883.11(DUF3403:Domain of unknown function (DUF3403))	sp|Q9SXB4|Y1130_ARATH(G-type lectin S-receptor-like serine/threonine-protein kinase At1g11300 OS=Arabidopsis thaliana OX=3702 GN=At1g11300 PE=2 SV=1)
MsG0080048160.01	MsG0080048160.01		417	0.209182	-2.25717	0.572408	1	no	down	0.145128	-2.7846	0.486187	1	no	down	1	0	1	1	no	no change	RHN51726.1(hypothetical protein MtrunA17_Chr6g0472071 [Medicago truncatula])
MsG0080048161.01	MsG0080048161.01		951	0.628082	-0.670975	0.801668	1	no	down	0.398395	-1.32773	0.622926	1	no	down	0.631921	-0.662185	0.846831	1	no	down	XP_003597270.2(serine carboxypeptidase-like [Medicago truncatula])	GO:0005773(cellular_component:vacuole); GO:0006508(biological_process:proteolysis); GO:0005576(cellular_component:extracellular region); GO:0004185(molecular_function:serine-type carboxypeptidase activity)	K16298	SCPL-IV		COG2939(E:Amino acid transport and metabolism)	COG2939(carboxy-peptidase)	PF00450.25(Peptidase_S10:Serine carboxypeptidase)	sp|P32826|SCP49_ARATH(Serine carboxypeptidase-like 49 OS=Arabidopsis thaliana OX=3702 GN=SCPL49 PE=2 SV=2)
MsG0080048162.01	MsG0080048162.01		213	1	0	1	1	no test	no test	1	0	1	1	no test	no test	1	0	1	1	no test	no test	KAI5398634.1(hypothetical protein KIW84_064126, partial [Pisum sativum])	GO:0016021(cellular_component:integral component of membrane); GO:0003887(molecular_function:DNA-directed DNA polymerase activity); GO:0015074(biological_process:DNA integration); GO:0008270(molecular_function:zinc ion binding); GO:0003676(molecular_function:nucleic acid binding); GO:0055085(biological_process:transmembrane transport)
MsG0080048163.01	MsG0080048163.01		243	0.936088	-0.0952841	0.90331	0.969987	no	down	0.904435	-0.144911	0.84877	0.952648	no	down	0.96278	-0.0547223	0.943017	0.999405	no	down	PNY11215.1(alpha-L-fucosidase 1-like protein [Trifolium pratense])	GO:0006004(biological_process:fucose metabolic process); GO:0004560(molecular_function:alpha-L-fucosidase activity); GO:0016139(biological_process:glycoside catabolic process); GO:0005975(biological_process:carbohydrate metabolic process); GO:0005764(cellular_component:lysosome)	K01206	FUCA	map00511(Other glycan degradation)	COG3669(G:Carbohydrate transport and metabolism)	COG3669(alpha-l-fucosidase)	PF01120.20(Alpha_L_fucos:Alpha-L-fucosidase)	sp|Q8GW72|FUCO1_ARATH(Alpha-L-fucosidase 1 OS=Arabidopsis thaliana OX=3702 GN=FUC1 PE=1 SV=2)
MsG0080048164.01	MsG0080048164.01		762	1.0992	0.136449	0.973324	1	no	up	0.761136	-0.393773	0.923122	1	no	down	0.689922	-0.535494	0.895591	1	no	down	XP_039685668.1(uncharacterized protein LOC112421946 [Medicago truncatula])
MsG0080048165.01	MsG0080048165.01		363	0.516558	-0.952997	0.765473	1	no	down	0.508165	-0.97663	0.706835	1	no	down	0.976934	-0.0336667	0.99054	1	no	down	XP_039685668.1(uncharacterized protein LOC112421946 [Medicago truncatula])	GO:0004523(molecular_function:RNA-DNA hybrid ribonuclease activity); GO:0003676(molecular_function:nucleic acid binding)
MsG0080048166.01	MsG0080048166.01		276	0.25652	-1.96285	0.511794	1	no	down	0.0916616	-3.44754	0.342331	1	no	down	0.354222	-1.49727	0.713666	1	no	down	XP_039687426.1(uncharacterized protein LOC120579409 [Medicago truncatula])	GO:0004523(molecular_function:RNA-DNA hybrid ribonuclease activity); GO:0003676(molecular_function:nucleic acid binding)
MsG0080048167.01	MsG0080048167.01		1275	1	0	1	1	no test	no test	1	0	1	1	no test	no test	1	0	1	1	no test	no test	GER38010.1(transactivator/viroplasmin protein [Striga asiatica])	GO:0016021(cellular_component:integral component of membrane); GO:0005886(cellular_component:plasma membrane); GO:0004674(molecular_function:protein serine/threonine kinase activity); GO:0004714(molecular_function:transmembrane receptor protein tyrosine kinase activity); GO:0004190(molecular_function:aspartic-type endopeptidase activity); GO:0004672(molecular_function:protein kinase activity); GO…						PF01693.19(Cauli_VI:Caulimovirus viroplasmin)	sp|P15628|IBMP_SOCMV(Transactivator/viroplasmin protein OS=Soybean chlorotic mottle virus OX=10651 GN=ORF VI PE=3 SV=2)
MsG0080048168.01	MsG0080048168.01		798	1	0	1	1	no test	no test	1	0	1	1	no test	no test	1	0	1	1	no test	no test	GAU47991.1(hypothetical protein TSUD_272360 [Trifolium subterraneum])	GO:0016787(molecular_function:hydrolase activity); GO:0004843(molecular_function:thiol-dependent ubiquitin-specific protease activity); GO:0005515(molecular_function:protein binding)						PF00917.29(MATH:MATH domain)	sp|Q9FPT1|UBP12_ARATH(Ubiquitin C-terminal hydrolase 12 OS=Arabidopsis thaliana OX=3702 GN=UBP12 PE=1 SV=2)
MsG0080048169.01	MsG0080048169.01		1077	0.199338	-2.32671	0.105858	1	no	down	0.397704	-1.33023	0.279338	0.583455	no	down	1.9662	0.975414	0.588947	1	no	up	RHN48856.1(putative pectinesterase [Medicago truncatula])	GO:0042545(biological_process:cell wall modification); GO:0046910(molecular_function:pectinesterase inhibitor activity); GO:0005618(cellular_component:cell wall); GO:0016021(cellular_component:integral component of membrane); GO:0030599(molecular_function:pectinesterase activity); GO:0045330(molecular_function:aspartyl esterase activity); GO:0045490(biological_process:pectin catabolic process)	K01051	E3.1.1.11	map00040(Pentose and glucuronate interconversions)	COG4677(G:Carbohydrate transport and metabolism)	COG4677(pectinesterase)	PF01095.22(Pectinesterase:Pectinesterase)	sp|O48711|PME12_ARATH(Probable pectinesterase/pectinesterase inhibitor 12 OS=Arabidopsis thaliana OX=3702 GN=PME12 PE=2 SV=1)
MsG0080048170.01	MsG0080048170.01		1167	1	0	1	1	no test	no test	1	0	1	1	no test	no test	1	0	1	1	no test	no test	GAU17568.1(hypothetical protein TSUD_341120 [Trifolium subterraneum])	GO:0016787(molecular_function:hydrolase activity); GO:0005515(molecular_function:protein binding)				COG5077(O:Posttranslational modification, protein turnover, chaperones)	COG5077(ubiquitin carboxyl-terminal hydrolase)		sp|Q9FPT1|UBP12_ARATH(Ubiquitin C-terminal hydrolase 12 OS=Arabidopsis thaliana OX=3702 GN=UBP12 PE=1 SV=2)
MsG0080048171.01	MsG0080048171.01		1094	1	0	1	1	no test	no test	1	0	1	1	no test	no test	1	0	1	1	no test	no test	RHN48856.1(putative pectinesterase [Medicago truncatula])	GO:0042545(biological_process:cell wall modification); GO:0046910(molecular_function:pectinesterase inhibitor activity); GO:0005618(cellular_component:cell wall); GO:0016021(cellular_component:integral component of membrane); GO:0030599(molecular_function:pectinesterase activity); GO:0045330(molecular_function:aspartyl esterase activity); GO:0045490(biological_process:pectin catabolic process)	K01051	E3.1.1.11	map00040(Pentose and glucuronate interconversions)	COG4677(G:Carbohydrate transport and metabolism)	COG4677(pectinesterase)	PF01095.22(Pectinesterase:Pectinesterase)	sp|Q1PEC0|PME42_ARATH(Probable pectinesterase/pectinesterase inhibitor 42 OS=Arabidopsis thaliana OX=3702 GN=PME42 PE=2 SV=1)
MsG0080048172.01	MsG0080048172.01		957	0.365046	-1.45385	0.65277	1	no	down	0.253103	-1.9822	0.540187	1	no	down	0.689922	-0.535494	0.895591	1	no	down	KAI5425180.1(hypothetical protein KIW84_031111 [Pisum sativum])	GO:0016787(molecular_function:hydrolase activity); GO:0005515(molecular_function:protein binding)				COG5077(O:Posttranslational modification, protein turnover, chaperones)	COG5077(ubiquitin carboxyl-terminal hydrolase)	PF00917.29(MATH:MATH domain)	sp|Q9FPT1|UBP12_ARATH(Ubiquitin C-terminal hydrolase 12 OS=Arabidopsis thaliana OX=3702 GN=UBP12 PE=1 SV=2)
MsG0080048173.01	MsG0080048173.01		339	1	0	1	1	no test	no test	1	0	1	1	no test	no test	1	0	1	1	no test	no test	XP_045795797.1(MATH domain and coiled-coil domain-containing protein At3g58360-like [Trifolium pratense])	GO:0016787(molecular_function:hydrolase activity); GO:0005515(molecular_function:protein binding)				COG5077(O:Posttranslational modification, protein turnover, chaperones)	COG5077(ubiquitin carboxyl-terminal hydrolase)	PF00917.29(MATH:MATH domain)	sp|Q9FPT1|UBP12_ARATH(Ubiquitin C-terminal hydrolase 12 OS=Arabidopsis thaliana OX=3702 GN=UBP12 PE=1 SV=2)
MsG0080048174.01	MsG0080048174.01		2034	1	0	1	1	no test	no test	1	0	1	1	no test	no test	1	0	1	1	no test	no test	XP_045794343.1(uncharacterized protein LOC123889166 [Trifolium pratense])	GO:0016787(molecular_function:hydrolase activity); GO:0005829(cellular_component:cytosol); GO:0004197(molecular_function:cysteine-type endopeptidase activity); GO:0003968(molecular_function:RNA-directed RNA polymerase activity); GO:0003723(molecular_function:RNA binding); GO:0005515(molecular_function:protein binding); GO:0005634(cellular_component:nucleus); GO:0016579(biological_process:protein …				COG5077(O:Posttranslational modification, protein turnover, chaperones)	COG5077(ubiquitin carboxyl-terminal hydrolase)	PF00917.29(MATH:MATH domain)	sp|Q9FPT1|UBP12_ARATH(Ubiquitin C-terminal hydrolase 12 OS=Arabidopsis thaliana OX=3702 GN=UBP12 PE=1 SV=2)
MsG0080048175.01	MsG0080048175.01		942	1	0	1	1	no test	no test	1	0	1	1	no test	no test	1	0	1	1	no test	no test	GAU17571.1(hypothetical protein TSUD_341150 [Trifolium subterraneum])	GO:0016787(molecular_function:hydrolase activity); GO:0005829(cellular_component:cytosol); GO:0004197(molecular_function:cysteine-type endopeptidase activity); GO:0003968(molecular_function:RNA-directed RNA polymerase activity); GO:0003723(molecular_function:RNA binding); GO:0005515(molecular_function:protein binding); GO:0005634(cellular_component:nucleus); GO:0016579(biological_process:protein …				COG5077(O:Posttranslational modification, protein turnover, chaperones)	COG5077(ubiquitin carboxyl-terminal hydrolase)	PF00917.29(MATH:MATH domain)	sp|Q9FPT1|UBP12_ARATH(Ubiquitin C-terminal hydrolase 12 OS=Arabidopsis thaliana OX=3702 GN=UBP12 PE=1 SV=2)
MsG0080048176.01	MsG0080048176.01		276	1	0	1	1	no test	no test	1	0	1	1	no test	no test	1	0	1	1	no test	no test	KEH16640.1(hypothetical protein MTR_0127s0030 [Medicago truncatula])	GO:0006468(biological_process:protein phosphorylation); GO:0008270(molecular_function:zinc ion binding); GO:0003676(molecular_function:nucleic acid binding); GO:0004672(molecular_function:protein kinase activity); GO:0003964(molecular_function:RNA-directed DNA polymerase activity); GO:0016874(molecular_function:ligase activity); GO:0005524(molecular_function:ATP binding)							sp|P10978|POLX_TOBAC(Retrovirus-related Pol polyprotein from transposon TNT 1-94 OS=Nicotiana tabacum OX=4097 PE=2 SV=1)
MsG0080048177.01	MsG0080048177.01		300	0.500749	-0.997841	0.0716496	0.27722	no	down	0.506935	-0.980128	0.0828823	0.284711	no	down	1.00697	0.0100185	0.987607	0.999405	no	up	PHT99666.1(hypothetical protein BC332_29454 [Capsicum chinense])	GO:0016887(molecular_function:ATPase activity); GO:0016021(cellular_component:integral component of membrane); GO:0019829(molecular_function:cation-transporting ATPase activity); GO:0005887(cellular_component:integral component of plasma membrane); GO:0005388(molecular_function:calcium-transporting ATPase activity); GO:0005524(molecular_function:ATP binding); GO:0043231(cellular_component:intrace…	K01537	ATP2C		ENOG410XNNC(P:Inorganic ion transport and metabolism)	ENOG410XNNC(ATPase, Ca transporting, plasma membrane)	PF00702.29(Hydrolase:haloacid dehalogenase-like hydrolase); PF08282.15(Hydrolase_3:haloacid dehalogenase-like hydrolase)	sp|Q9LY77|ACA12_ARATH(Calcium-transporting ATPase 12, plasma membrane-type OS=Arabidopsis thaliana OX=3702 GN=ACA12 PE=2 SV=1)
MsG0080048178.01	MsG0080048178.01		1584	0.460657	-1.11824	0.00250009	0.0289757	yes	down	0.402425	-1.31321	0.000189116	0.00317695	yes	down	0.870766	-0.199644	0.568527	0.999405	no	down	XP_013449801.1(calcium-transporting ATPase 12, plasma membrane-type [Medicago truncatula])	GO:0005887(cellular_component:integral component of plasma membrane); GO:0016021(cellular_component:integral component of membrane); GO:0019829(molecular_function:cation-transporting ATPase activity); GO:0016887(molecular_function:ATPase activity); GO:0005388(molecular_function:calcium-transporting ATPase activity); GO:0000166(molecular_function:nucleotide binding); GO:0005524(molecular_function:…	K01537	ATP2C		ENOG410XNNC(P:Inorganic ion transport and metabolism)	ENOG410XNNC(ATPase, Ca transporting, plasma membrane)	PF00122.23(E1-E2_ATPase:E1-E2 ATPase); PF00690.29(Cation_ATPase_N:Cation transporter/ATPase, N-terminus); PF13246.9(Cation_ATPase:Cation transport ATPase (P-type)); PF00702.29(Hydrolase:haloacid dehalogenase-like hydrolase)	sp|Q9LY77|ACA12_ARATH(Calcium-transporting ATPase 12, plasma membrane-type OS=Arabidopsis thaliana OX=3702 GN=ACA12 PE=2 SV=1)
MsG0080048179.01	MsG0080048179.01		888	1	0	1	1	no test	no test	1	0	1	1	no test	no test	1	0	1	1	no test	no test	KAI5434002.1(hypothetical protein KIW84_021019 [Pisum sativum])	GO:0006812(biological_process:cation transport); GO:0016021(cellular_component:integral component of membrane); GO:0015299(molecular_function:solute:proton antiporter activity); GO:0055085(biological_process:transmembrane transport)				COG0475(P:Inorganic ion transport and metabolism)	COG0475(Sodium hydrogen exchanger)	PF00999.24(Na_H_Exchanger:Sodium/hydrogen exchanger family)	sp|Q9SIT5|CHX15_ARATH(Cation/H(+) antiporter 15 OS=Arabidopsis thaliana OX=3702 GN=CHX15 PE=2 SV=1)
MsG0080048180.01	MsG0080048180.01		582	1	0	1	1	no test	no test	1	0	1	1	no test	no test	1	0	1	1	no test	no test	XP_027187918.1(cation/H(+) antiporter 15-like [Cicer arietinum])	GO:0006571(biological_process:tyrosine biosynthetic process); GO:0006812(biological_process:cation transport); GO:0016021(cellular_component:integral component of membrane); GO:0015299(molecular_function:solute:proton antiporter activity); GO:0008977(molecular_function:prephenate dehydrogenase activity); GO:0004665(molecular_function:prephenate dehydrogenase (NADP+) activity); GO:0012505(cellular…				COG0475(P:Inorganic ion transport and metabolism)	COG0475(Sodium hydrogen exchanger)	PF00999.24(Na_H_Exchanger:Sodium/hydrogen exchanger family)	sp|Q9SIT5|CHX15_ARATH(Cation/H(+) antiporter 15 OS=Arabidopsis thaliana OX=3702 GN=CHX15 PE=2 SV=1)
MsG0080048181.01	MsG0080048181.01		2073	1	0	1	1	no test	no test	1	0	1	1	no test	no test	1	0	1	1	no test	no test	XP_003622013.2(heat shock cognate 70 kDa protein [Medicago truncatula])	GO:0005737(cellular_component:cytoplasm); GO:0031072(molecular_function:heat shock protein binding); GO:0016021(cellular_component:integral component of membrane); GO:0044183(molecular_function:protein binding involved in protein folding); GO:0051082(molecular_function:unfolded protein binding); GO:0140662(deleted:old GO); GO:0051787(molecular_function:misfolded protein binding); GO:0034620(biolo…	K03283	HSPA1s	map04144(Endocytosis); map04141(Protein processing in endoplasmic reticulum); map03040(Spliceosome)	COG0443(O:Posttranslational modification, protein turnover, chaperones)	COG0443(Heat shock protein)	PF00012.23(HSP70:Hsp70 protein); PF06723.16(MreB_Mbl:MreB/Mbl protein)	sp|P09189|HSP7C_PETHY(Heat shock cognate 70 kDa protein OS=Petunia hybrida OX=4102 GN=HSP70 PE=2 SV=1)
MsG0080048182.01	MsG0080048182.01		1905	1	0	1	1	no test	no test	1	0	1	1	no test	no test	1	0	1	1	no test	no test	XP_003622013.2(heat shock cognate 70 kDa protein [Medicago truncatula])	GO:0005737(cellular_component:cytoplasm); GO:0031072(molecular_function:heat shock protein binding); GO:0016021(cellular_component:integral component of membrane); GO:0044183(molecular_function:protein binding involved in protein folding); GO:0051082(molecular_function:unfolded protein binding); GO:0140662(deleted:old GO); GO:0051787(molecular_function:misfolded protein binding); GO:0034620(biolo…	K03283	HSPA1s	map04144(Endocytosis); map04141(Protein processing in endoplasmic reticulum); map03040(Spliceosome)	COG0443(O:Posttranslational modification, protein turnover, chaperones)	COG0443(Heat shock protein)	PF00012.23(HSP70:Hsp70 protein); PF06723.16(MreB_Mbl:MreB/Mbl protein)	sp|P09189|HSP7C_PETHY(Heat shock cognate 70 kDa protein OS=Petunia hybrida OX=4102 GN=HSP70 PE=2 SV=1)
MsG0080048183.01	MsG0080048183.01		1899	1	0	1	1	no test	no test	1	0	1	1	no test	no test	1	0	1	1	no test	no test	XP_003622013.2(heat shock cognate 70 kDa protein [Medicago truncatula])	GO:0005737(cellular_component:cytoplasm); GO:0031072(molecular_function:heat shock protein binding); GO:0016021(cellular_component:integral component of membrane); GO:0044183(molecular_function:protein binding involved in protein folding); GO:0051082(molecular_function:unfolded protein binding); GO:0140662(deleted:old GO); GO:0051787(molecular_function:misfolded protein binding); GO:0034620(biolo…	K03283	HSPA1s	map04144(Endocytosis); map04141(Protein processing in endoplasmic reticulum); map03040(Spliceosome)	COG0443(O:Posttranslational modification, protein turnover, chaperones)	COG0443(Heat shock protein)	PF00012.23(HSP70:Hsp70 protein); PF06723.16(MreB_Mbl:MreB/Mbl protein)	sp|P09189|HSP7C_PETHY(Heat shock cognate 70 kDa protein OS=Petunia hybrida OX=4102 GN=HSP70 PE=2 SV=1)
MsG0080048184.01	MsG0080048184.01		1521	1	0	1	1	no test	no test	1	0	1	1	no test	no test	1	0	1	1	no test	no test	XP_039688535.1(LOW QUALITY PROTEIN: heat shock cognate 70 kDa protein [Medicago truncatula])	GO:0005737(cellular_component:cytoplasm); GO:0031072(molecular_function:heat shock protein binding); GO:0016021(cellular_component:integral component of membrane); GO:0044183(molecular_function:protein binding involved in protein folding); GO:0051082(molecular_function:unfolded protein binding); GO:0140662(deleted:old GO); GO:0051787(molecular_function:misfolded protein binding); GO:0034620(biolo…	K03283	HSPA1s	map04144(Endocytosis); map04141(Protein processing in endoplasmic reticulum); map03040(Spliceosome)	COG0443(O:Posttranslational modification, protein turnover, chaperones)	COG0443(Heat shock protein)	PF00012.23(HSP70:Hsp70 protein); PF06723.16(MreB_Mbl:MreB/Mbl protein)	sp|Q9C7X7|HSP7N_ARATH(Heat shock 70 kDa protein 18 OS=Arabidopsis thaliana OX=3702 GN=HSP70-18 PE=2 SV=1)
MsG0080048185.01	MsG0080048185.01		1554	1.05461	0.0767088	0.707827	0.88712	no	up	1.06156	0.0861886	0.722336	0.899733	no	up	1.00299	0.00431181	0.983883	0.999405	no	up	XP_010446577.2(PREDICTED: histone H3-like centromeric protein CSE4 [Camelina sativa])	GO:0030527(molecular_function:structural constituent of chromatin); GO:0000786(cellular_component:nucleosome); GO:0022900(biological_process:electron transport chain); GO:0016651(molecular_function:oxidoreductase activity, acting on NAD(P)H); GO:0003677(molecular_function:DNA binding); GO:0046982(molecular_function:protein heterodimerization activity)	K11253	H3				PF00125.27(Histone:Core histone H2A/H2B/H3/H4); PF04800.15(NDUS4:NADH dehydrogenase ubiquinone Fe-S protein 4); PF15630.9(CENP-S:CENP-S protein); PF15511.9(CENP-T_C:Centromere kinetochore component CENP-T histone fold); PF15715.8(PAF:PCNA-associated factor histone like domain)	sp|P59169|H33_ARATH(Histone H3.3 OS=Arabidopsis thaliana OX=3702 GN=HTR4 PE=1 SV=2)
MsG0080048186.01	MsG0080048186.01		555	3.54622	1.82628	0.000551174	0.00963283	yes	up	4.90474	2.29418	0.000996009	0.0117428	yes	up	1.38105	0.465764	0.454835	0.999405	no	up	KEH31538.1(DUF4228 domain protein [Medicago truncatula])					ENOG41123BV(S:Function unknown)	ENOG41123BV(expressed protein)	PF14009.9(PADRE:PADRE domain)
MsG0080048187.01	MsG0080048187.01		765	5.52557	2.46612	0.537737	1	no	up	1	0	1	1	no test	no test	0.136304	-2.8751	0.472417	1	no	down	RHN60765.1(putative RNA-directed DNA polymerase [Medicago truncatula])	GO:0016787(molecular_function:hydrolase activity); GO:0004805(molecular_function:trehalose-phosphatase activity); GO:0005992(biological_process:trehalose biosynthetic process); GO:0015074(biological_process:DNA integration); GO:0008270(molecular_function:zinc ion binding); GO:0003676(molecular_function:nucleic acid binding); GO:0003964(molecular_function:RNA-directed DNA polymerase activity)						PF14223.9(Retrotran_gag_2:gag-polypeptide of LTR copia-type); PF00098.26(zf-CCHC:Zinc knuckle)	sp|P10978|POLX_TOBAC(Retrovirus-related Pol polyprotein from transposon TNT 1-94 OS=Nicotiana tabacum OX=4097 PE=2 SV=1)
MsG0080048188.01	MsG0080048188.01		228	1	0	1	1	no test	no test	1	0	1	1	no test	no test	1	0	1	1	no test	no test	KAI5389899.1(hypothetical protein KIW84_075277 [Pisum sativum])	GO:0006310(biological_process:DNA recombination); GO:0005634(cellular_component:nucleus); GO:0004523(molecular_function:RNA-DNA hybrid ribonuclease activity); GO:0003887(molecular_function:DNA-directed DNA polymerase activity); GO:0015074(biological_process:DNA integration); GO:0030430(cellular_component:host cell cytoplasm); GO:0003723(molecular_function:RNA binding); GO:0003676(molecular_functi…
MsG0080048189.01	MsG0080048189.01		174	1	0	1	1	no test	no test	1	0	1	1	no test	no test	1	0	1	1	no test	no test	GAU45284.1(hypothetical protein TSUD_98730 [Trifolium subterraneum])	GO:0006310(biological_process:DNA recombination); GO:0005634(cellular_component:nucleus); GO:0004523(molecular_function:RNA-DNA hybrid ribonuclease activity); GO:0003887(molecular_function:DNA-directed DNA polymerase activity); GO:0015074(biological_process:DNA integration); GO:0004190(molecular_function:aspartic-type endopeptidase activity); GO:0003723(molecular_function:RNA binding); GO:0003676…
MsG0080048190.01	MsG0080048190.01		267	1	0	1	1	no test	no test	1	0	1	1	no test	no test	1	0	1	1	no test	no test	RHN51728.1(hypothetical protein MtrunA17_Chr6g0472091 [Medicago truncatula])	GO:0003964(molecular_function:RNA-directed DNA polymerase activity); GO:0015074(biological_process:DNA integration); GO:0008270(molecular_function:zinc ion binding); GO:0003676(molecular_function:nucleic acid binding)
MsG0080048191.01	MsG0080048191.01		788	1	0	1	1	no test	no test	1	0	1	1	no test	no test	1	0	1	1	no test	no test	XP_013454932.1(probable glutathione S-transferase [Medicago truncatula])	GO:0005737(cellular_component:cytoplasm); GO:0042221(biological_process:response to chemical); GO:0004364(molecular_function:glutathione transferase activity); GO:0006749(biological_process:glutathione metabolic process); GO:0005515(molecular_function:protein binding)	K00799	GST, gst	map00480(Glutathione metabolism)	ENOG410XSIX(O:Posttranslational modification, protein turnover, chaperones)	ENOG410XSIX(glutathione Stransferase)		sp|P32110|GSTX6_SOYBN(Probable glutathione S-transferase OS=Glycine max OX=3847 GN=HSP26-A PE=2 SV=1)
MsG0080048192.01	MsG0080048192.01		729	1	0	1	1	no test	no test	1	0	1	1	no test	no test	1	0	1	1	no test	no test	XP_013454933.1(universal stress protein PHOS32 [Medicago truncatula])	GO:0016787(molecular_function:hydrolase activity); GO:0006950(biological_process:response to stress)				ENOG410YI8C(T:Signal transduction mechanisms)	ENOG410YI8C(universal stress protein)	PF00582.29(Usp:Universal stress protein family)
MsG0080048193.01	MsG0080048193.01		1521	0.288579	-1.79296	0.553844	1	no	down	0.374931	-1.4153	0.626113	1	no	down	1.30146	0.380129	0.924963	1	no	up	XP_013454936.1(ferrochelatase-2, chloroplastic isoform X2 [Medicago truncatula])	GO:0006783(biological_process:heme biosynthetic process); GO:0016021(cellular_component:integral component of membrane); GO:0005739(cellular_component:mitochondrion); GO:0004325(molecular_function:ferrochelatase activity); GO:0009507(cellular_component:chloroplast)	K01772	hemH, FECH	map00860(Porphyrin metabolism); map01240(Biosynthesis of cofactors)	COG0276(H:Coenzyme transport and metabolism)	COG0276(Catalyzes the ferrous insertion into protoporphyrin IX (By similarity))	PF00762.22(Ferrochelatase:Ferrochelatase)	sp|P42044|HEMH_CUCSA(Ferrochelatase-2, chloroplastic OS=Cucumis sativus OX=3659 GN=HEMH PE=2 SV=1)
MsG0080048194.01	MsG0080048194.01		192	1	0	1	1	no test	no test	1	0	1	1	no test	no test	1	0	1	1	no test	no test	XP_003610296.2(uncharacterized protein LOC11437570 [Medicago truncatula])	GO:0046983(molecular_function:protein dimerization activity); GO:0016021(cellular_component:integral component of membrane)
MsG0080048195.01	MsG0080048195.01		1589	1.34956	0.432488	0.36696	0.668878	no	up	0.999939	-8.76288e-05	0.999841	0.999951	no	down	0.738591	-0.437153	0.348993	0.988715	no	down	XP_013454936.1(ferrochelatase-2, chloroplastic isoform X2 [Medicago truncatula])	GO:0006783(biological_process:heme biosynthetic process); GO:0016021(cellular_component:integral component of membrane); GO:0005739(cellular_component:mitochondrion); GO:0004325(molecular_function:ferrochelatase activity); GO:0009507(cellular_component:chloroplast)	K01772	hemH, FECH	map00860(Porphyrin metabolism); map01240(Biosynthesis of cofactors)	COG0276(H:Coenzyme transport and metabolism)	COG0276(Catalyzes the ferrous insertion into protoporphyrin IX (By similarity))	PF00762.22(Ferrochelatase:Ferrochelatase)	sp|P42044|HEMH_CUCSA(Ferrochelatase-2, chloroplastic OS=Cucumis sativus OX=3659 GN=HEMH PE=2 SV=1)
MsG0080048196.01	MsG0080048196.01		1311	1	0	1	1	no test	no test	1	0	1	1	no test	no test	1	0	1	1	no test	no test	GAU25489.1(hypothetical protein TSUD_218610 [Trifolium subterraneum])	GO:0008270(molecular_function:zinc ion binding); GO:0003676(molecular_function:nucleic acid binding)				ENOG410Y65V(S:Function unknown)	ENOG410Y65V(Retrotransposon protein)	PF14111.9(DUF4283:Domain of unknown function (DUF4283))
MsG0080048197.01	MsG0080048197.01		1021	0.709953	-0.494205	0.288905	0.593782	no	down	1.38803	0.473036	0.309807	0.616309	no	up	1.94897	0.962714	0.00714219	0.354328	no	up	XP_013454933.1(universal stress protein PHOS32 [Medicago truncatula])	GO:0016787(molecular_function:hydrolase activity); GO:0006950(biological_process:response to stress)				ENOG410YI8C(T:Signal transduction mechanisms)	ENOG410YI8C(universal stress protein)	PF00582.29(Usp:Universal stress protein family)	sp|Q8VYN9|PHO32_ARATH(Universal stress protein PHOS32 OS=Arabidopsis thaliana OX=3702 GN=PHOS32 PE=1 SV=1)
MsG0080048198.01	MsG0080048198.01		993	0.43493	-1.20115	0.332178	0.638253	no	down	0.650433	-0.620528	0.582923	0.827037	no	down	1.48402	0.569511	0.444549	0.999405	no	up	XP_013454932.1(probable glutathione S-transferase [Medicago truncatula])	GO:0005737(cellular_component:cytoplasm); GO:0042221(biological_process:response to chemical); GO:0004364(molecular_function:glutathione transferase activity); GO:0006749(biological_process:glutathione metabolic process); GO:0005515(molecular_function:protein binding)	K00799	GST, gst	map00480(Glutathione metabolism)	ENOG410XSIX(O:Posttranslational modification, protein turnover, chaperones)	ENOG410XSIX(glutathione Stransferase)	PF02798.23(GST_N:Glutathione S-transferase, N-terminal domain); PF13417.9(GST_N_3:Glutathione S-transferase, N-terminal domain); PF13409.9(GST_N_2:Glutathione S-transferase, N-terminal domain); PF00043.28(GST_C:Glutathione S-transferase, C-terminal domain); PF13410.9(GST_C_2:Glutathione S-transferase, C-terminal domain); PF17172.7(GST_N_4:Glutathione S-transferase N-terminal domain)	sp|P32110|GSTX6_SOYBN(Probable glutathione S-transferase OS=Glycine max OX=3847 GN=HSP26-A PE=2 SV=1)
MsG0080048199.01	MsG0080048199.01		384	0.638014	-0.64834	0.830449	1	no	down	0.413569	-1.2738	0.725428	1	no	down	0.652173	-0.616673	0.854056	1	no	down	AES80922.1(hypothetical protein MTR_7g086540 [Medicago truncatula])	GO:0003964(molecular_function:RNA-directed DNA polymerase activity); GO:0015074(biological_process:DNA integration); GO:0008270(molecular_function:zinc ion binding); GO:0003676(molecular_function:nucleic acid binding)
MsG0080048200.01	MsG0080048200.01		258	1	0	1	1	no test	no test	1	0	1	1	no test	no test	1	0	1	1	no test	no test	AES70076.1(hypothetical protein MTR_3g047490 [Medicago truncatula])	GO:0003735(molecular_function:structural constituent of ribosome); GO:0032543(biological_process:mitochondrial translation); GO:0005762(cellular_component:mitochondrial large ribosomal subunit); GO:0019843(molecular_function:rRNA binding)	K02878	RP-L16, MRPL16, rplP	map03010(Ribosome)
MsG0080048201.01	MsG0080048201.01		345	0.348492	-1.5208	0.707643	1	no	down	0.471021	-1.08614	0.788838	1	no	down	1.34376	0.426279	0.916798	1	no	up	AES70076.1(hypothetical protein MTR_3g047490 [Medicago truncatula])	GO:0003735(molecular_function:structural constituent of ribosome); GO:0032543(biological_process:mitochondrial translation); GO:0005762(cellular_component:mitochondrial large ribosomal subunit); GO:0019843(molecular_function:rRNA binding)	K02878	RP-L16, MRPL16, rplP	map03010(Ribosome)
MsG0080048202.01	MsG0080048202.01		5260	1.01587	0.0227128	0.93055	0.979078	no	up	0.761039	-0.393958	0.209979	0.499797	no	down	0.746843	-0.421123	0.0914882	0.840359	no	down	AAB41904.1(NADH-dependent glutamate synthase [Medicago sativa])	GO:0015930(molecular_function:glutamate synthase activity); GO:0050660(molecular_function:flavin adenine dinucleotide binding); GO:0051538(molecular_function:3 iron, 4 sulfur cluster binding); GO:0019676(biological_process:ammonia assimilation cycle); GO:0016638(molecular_function:oxidoreductase activity, acting on the CH-NH2 group of donors); GO:0097054(biological_process:L-glutamate biosyntheti…	K00264	GLT1	map00250(Alanine, aspartate and glutamate metabolism); map00910(Nitrogen metabolism)	COG0067(E:Amino acid transport and metabolism)	COG0067(glutamate synthase)	PF01645.20(Glu_synthase:Conserved region in glutamate synthase); PF00310.24(GATase_2:Glutamine amidotransferases class-II); PF04898.17(Glu_syn_central:Glutamate synthase central domain); PF01493.22(GXGXG:GXGXG motif); PF14691.9(Fer4_20:Dihydroprymidine dehydrogenase domain II, 4Fe-4S cluster)	sp|Q03460|GLSN_MEDSA(Glutamate synthase [NADH], amyloplastic OS=Medicago sativa OX=3879 PE=1 SV=1)
MsG0080048203.01	MsG0080048203.01		2625	0.460605	-1.1184	0.0829461	0.302752	no	down	0.177461	-2.49443	2.0089e-09	2.07665e-07	yes	down	0.383559	-1.38248	0.0231411	0.572157	no	down	XP_013466269.3(cysteine-rich receptor-like protein kinase 41 [Medicago truncatula])	GO:0006468(biological_process:protein phosphorylation); GO:0008889(molecular_function:glycerophosphodiester phosphodiesterase activity); GO:0016021(cellular_component:integral component of membrane); GO:0016020(cellular_component:membrane); GO:0030247(molecular_function:polysaccharide binding); GO:0004672(molecular_function:protein kinase activity); GO:0005524(molecular_function:ATP binding)				COG0515(T:Signal transduction mechanisms)	COG0515(Serine Threonine protein kinase)	PF07714.20(PK_Tyr_Ser-Thr:Protein tyrosine and serine/threonine kinase); PF00069.28(Pkinase:Protein kinase domain); PF13947.9(GUB_WAK_bind:Wall-associated receptor kinase galacturonan-binding)	sp|P93604|LRK10_WHEAT(Rust resistance kinase Lr10 OS=Triticum aestivum OX=4565 GN=LRK10 PE=2 SV=1)
MsG0080048204.01	MsG0080048204.01		1755	0.405011	-1.30397	0.0538984	0.232663	no	down	0.215607	-2.21352	7.98842e-06	0.000243885	yes	down	0.528517	-0.91998	0.233471	0.962055	no	down	XP_013466271.1(rust resistance kinase Lr10 [Medicago truncatula])	GO:0006468(biological_process:protein phosphorylation); GO:0008889(molecular_function:glycerophosphodiester phosphodiesterase activity); GO:0016021(cellular_component:integral component of membrane); GO:0016020(cellular_component:membrane); GO:0004672(molecular_function:protein kinase activity); GO:0005524(molecular_function:ATP binding)				COG0515(T:Signal transduction mechanisms)	COG0515(Serine Threonine protein kinase)	PF07714.20(PK_Tyr_Ser-Thr:Protein tyrosine and serine/threonine kinase); PF00069.28(Pkinase:Protein kinase domain)	sp|P93604|LRK10_WHEAT(Rust resistance kinase Lr10 OS=Triticum aestivum OX=4565 GN=LRK10 PE=2 SV=1)
MsG0080048205.01	MsG0080048205.01		1356	0.546198	-0.872504	0.157736	0.43709	no	down	0.152159	-2.71634	1.42216e-13	5.77911e-11	yes	down	0.277111	-1.85147	0.00407842	0.27002	no	down	XP_013466271.1(rust resistance kinase Lr10 [Medicago truncatula])	GO:0006468(biological_process:protein phosphorylation); GO:0008889(molecular_function:glycerophosphodiester phosphodiesterase activity); GO:0016021(cellular_component:integral component of membrane); GO:0016020(cellular_component:membrane); GO:0004672(molecular_function:protein kinase activity); GO:0005524(molecular_function:ATP binding)				COG0515(T:Signal transduction mechanisms)	COG0515(Serine Threonine protein kinase)	PF07714.20(PK_Tyr_Ser-Thr:Protein tyrosine and serine/threonine kinase); PF00069.28(Pkinase:Protein kinase domain)	sp|P93604|LRK10_WHEAT(Rust resistance kinase Lr10 OS=Triticum aestivum OX=4565 GN=LRK10 PE=2 SV=1)
MsG0080048206.01	MsG0080048206.01		2707	0.713128	-0.487766	0.644397	0.855341	no	down	0.333134	-1.58583	0.00562621	0.0435768	yes	down	0.462625	-1.11208	0.3009	0.980149	no	down	XP_013466269.3(cysteine-rich receptor-like protein kinase 41 [Medicago truncatula])	GO:0006468(biological_process:protein phosphorylation); GO:0008889(molecular_function:glycerophosphodiester phosphodiesterase activity); GO:0016021(cellular_component:integral component of membrane); GO:0016020(cellular_component:membrane); GO:0030247(molecular_function:polysaccharide binding); GO:0004672(molecular_function:protein kinase activity); GO:0005524(molecular_function:ATP binding)				COG0515(T:Signal transduction mechanisms)	COG0515(Serine Threonine protein kinase)	PF07714.20(PK_Tyr_Ser-Thr:Protein tyrosine and serine/threonine kinase); PF00069.28(Pkinase:Protein kinase domain); PF13947.9(GUB_WAK_bind:Wall-associated receptor kinase galacturonan-binding)	sp|P93604|LRK10_WHEAT(Rust resistance kinase Lr10 OS=Triticum aestivum OX=4565 GN=LRK10 PE=2 SV=1)
MsG0080048207.01	MsG0080048207.01		1755	0.405011	-1.30397	0.0538984	0.232663	no	down	0.215607	-2.21352	7.98842e-06	0.000243885	yes	down	0.528517	-0.91998	0.233471	0.962055	no	down	XP_013466271.1(rust resistance kinase Lr10 [Medicago truncatula])	GO:0006468(biological_process:protein phosphorylation); GO:0008889(molecular_function:glycerophosphodiester phosphodiesterase activity); GO:0016021(cellular_component:integral component of membrane); GO:0016020(cellular_component:membrane); GO:0004672(molecular_function:protein kinase activity); GO:0005524(molecular_function:ATP binding)				COG0515(T:Signal transduction mechanisms)	COG0515(Serine Threonine protein kinase)	PF07714.20(PK_Tyr_Ser-Thr:Protein tyrosine and serine/threonine kinase); PF00069.28(Pkinase:Protein kinase domain)	sp|P93604|LRK10_WHEAT(Rust resistance kinase Lr10 OS=Triticum aestivum OX=4565 GN=LRK10 PE=2 SV=1)
MsG0080048208.01	MsG0080048208.01		1209	0.217308	-2.20219	0.040145	0.194752	no	down	0.0778481	-3.68319	0.000265255	0.00416231	yes	down	0.357157	-1.48537	0.407668	0.999405	no	down	KEH40310.1(stress-induced receptor-like kinase [Medicago truncatula])	GO:0006468(biological_process:protein phosphorylation); GO:0008889(molecular_function:glycerophosphodiester phosphodiesterase activity); GO:0016021(cellular_component:integral component of membrane); GO:0016020(cellular_component:membrane); GO:0030247(molecular_function:polysaccharide binding); GO:0004674(molecular_function:protein serine/threonine kinase activity); GO:0004672(molecular_function:…				COG0515(T:Signal transduction mechanisms)	COG0515(Serine Threonine protein kinase)	PF00069.28(Pkinase:Protein kinase domain); PF07714.20(PK_Tyr_Ser-Thr:Protein tyrosine and serine/threonine kinase)	sp|P93604|LRK10_WHEAT(Rust resistance kinase Lr10 OS=Triticum aestivum OX=4565 GN=LRK10 PE=2 SV=1)
MsG0080048209.01	MsG0080048209.01		957	0.206303	-2.27717	0.56889	1	no	down	0.277244	-1.85077	0.643194	1	no	down	1.34376	0.426279	0.916798	1	no	up	GAU10650.1(hypothetical protein TSUD_419820, partial [Trifolium subterraneum])	GO:0009755(biological_process:hormone-mediated signaling pathway); GO:0006468(biological_process:protein phosphorylation); GO:0016021(cellular_component:integral component of membrane); GO:0004672(molecular_function:protein kinase activity); GO:0005886(cellular_component:plasma membrane); GO:0005524(molecular_function:ATP binding)				COG4886(S:Function unknown)	COG4886(leucine Rich Repeat)	PF00069.28(Pkinase:Protein kinase domain); PF07714.20(PK_Tyr_Ser-Thr:Protein tyrosine and serine/threonine kinase)	sp|Q8VZG8|MIK2_ARATH(MDIS1-interacting receptor like kinase 2 OS=Arabidopsis thaliana OX=3702 GN=MIK2 PE=1 SV=3)
MsG0080048210.01	MsG0080048210.01		1344	1.25335	0.325793	0.808461	0.930511	no	up	0.591753	-0.756934	0.668234	0.874923	no	down	0.466568	-1.09984	0.584429	1	no	down	XP_039685750.1(phospholipase A1 PLIP2, chloroplastic-like [Medicago truncatula])	GO:0008970(molecular_function:phosphatidylcholine 1-acylhydrolase activity); GO:0016021(cellular_component:integral component of membrane); GO:0006629(biological_process:lipid metabolic process)				ENOG410ZUTC(S:Function unknown)	ENOG410ZUTC(lipase class 3 family protein)	PF01764.28(Lipase_3:Lipase (class 3))	sp|F4HXL0|PLIP2_ARATH(Phospholipase A1 PLIP2, chloroplastic OS=Arabidopsis thaliana OX=3702 GN=PLIP2 PE=1 SV=1)
MsG0080048211.01	MsG0080048211.01		825	0.466392	-1.10038	0.0677181	0.267661	no	down	0.559592	-0.837553	0.102036	0.325989	no	down	1.19529	0.257363	0.692965	0.999405	no	up	XP_003591431.1(transcription initiation factor TFIID subunit 13 [Medicago truncatula])	GO:0005634(cellular_component:nucleus); GO:0009960(biological_process:endosperm development); GO:0009793(biological_process:embryo development ending in seed dormancy); GO:0006366(biological_process:transcription from RNA polymerase II promoter); GO:0046982(molecular_function:protein heterodimerization activity); GO:0003743(molecular_function:translation initiation factor activity)	K03127	TAF13	map03022(Basal transcription factors)	COG5248(K:Transcription)	COG5248(TAF13 RNA polymerase II, TATA box binding protein (TBP)-associated factor)	PF02269.19(TFIID-18kDa:Transcription initiation factor IID, 18kD subunit)	sp|Q6NQH4|TAF13_ARATH(Transcription initiation factor TFIID subunit 13 OS=Arabidopsis thaliana OX=3702 GN=TAF13 PE=1 SV=1)
MsG0080048212.01	MsG0080048212.01		1059	0.62624	-0.675212	0.151399	0.427253	no	down	0.640305	-0.643169	0.168597	0.440637	no	down	1.01981	0.0282958	0.933113	0.999405	no	up	RHN81114.1(putative UDP-glucuronate decarboxylase [Medicago truncatula])	GO:0042732(biological_process:D-xylose metabolic process); GO:0033320(biological_process:UDP-D-xylose biosynthetic process); GO:0070403(molecular_function:NAD+ binding); GO:0016021(cellular_component:integral component of membrane); GO:0005737(cellular_component:cytoplasm); GO:0048040(molecular_function:UDP-glucuronate decarboxylase activity)	K08678	UXS1, uxs	map00520(Amino sugar and nucleotide sugar metabolism); map01250(Biosynthesis of nucleotide sugars)	COG0451(M:Cell wall/membrane/envelope biogenesis)	COG0451(Nad-dependent epimerase dehydratase)	PF16363.8(GDP_Man_Dehyd:GDP-mannose 4,6 dehydratase); PF01370.24(Epimerase:NAD dependent epimerase/dehydratase family); PF01073.22(3Beta_HSD:3-beta hydroxysteroid dehydrogenase/isomerase family)	sp|Q9LZI2|UXS2_ARATH(UDP-glucuronic acid decarboxylase 2 OS=Arabidopsis thaliana OX=3702 GN=UXS2 PE=1 SV=1)
MsG0080048213.01	MsG0080048213.01		333	1.75053	0.807789	0.83171	1	no	up	0.471021	-1.08614	0.788838	1	no	down	0.265396	-1.91378	0.625695	1	no	down	KAH1250755.1(hypothetical protein GmHk_05G013835 [Glycine max])		K03231	EEF1A	map03013(Nucleocytoplasmic transport)	ENOG410Y42B(S:Function unknown)	ENOG410Y42B(-)
MsG0080048214.01	MsG0080048214.01		1643	1.5421	0.624894	0.209454	0.507042	no	up	1.07505	0.104401	0.8277	0.944655	no	up	0.694405	-0.526151	0.192491	0.941909	no	down	XP_003591520.1(caffeoylshikimate esterase [Medicago truncatula])	GO:0016787(molecular_function:hydrolase activity); GO:0016020(cellular_component:membrane); GO:0016746(molecular_function:transferase activity, transferring acyl groups); GO:0003846(molecular_function:2-acylglycerol O-acyltransferase activity); GO:0016298(molecular_function:lipase activity); GO:0047372(molecular_function:acylglycerol lipase activity)	K18368;K01054	CSE;MGLL	map00940(Phenylpropanoid biosynthesis); map00561(Glycerolipid metabolism)	COG2267(I:Lipid transport and metabolism)	COG2267(alpha beta hydrolase fold)	PF12146.11(Hydrolase_4:Serine aminopeptidase, S33); PF00561.23(Abhydrolase_1:alpha/beta hydrolase fold); PF12697.10(Abhydrolase_6:Alpha/beta hydrolase family); PF20408.1(Abhydrolase_11:Alpha/beta hydrolase domain); PF00326.24(Peptidase_S9:Prolyl oligopeptidase family); PF20434.1(BD-FAE:BD-FAE); PF07859.16(Abhydrolase_3:alpha/beta hydrolase fold)	sp|Q9C942|CSE_ARATH(Caffeoylshikimate esterase OS=Arabidopsis thaliana OX=3702 GN=CSE PE=1 SV=1)
MsG0080048215.01	MsG0080048215.01		623	1.49233	0.577571	0.357649	0.660687	no	up	1.55404	0.636022	0.316697	0.623944	no	up	1.03796	0.0537478	0.912432	0.999405	no	up	XP_003591518.1(outer envelope pore protein 16-4, chloroplastic [Medicago truncatula])	GO:0042721(cellular_component:mitochondrial inner membrane protein insertion complex); GO:0045039(biological_process:protein import into mitochondrial inner membrane); GO:0016021(cellular_component:integral component of membrane); GO:0030943(molecular_function:mitochondrion targeting sequence binding); GO:0008320(molecular_function:protein transmembrane transporter activity)	K17790	TIM22		ENOG410YVII(O:Posttranslational modification, protein turnover, chaperones)	ENOG410YVII(Tim17/Tim22/Tim23/Pmp24 family)	PF02466.22(Tim17:Tim17/Tim22/Tim23/Pmp24 family)	sp|Q9LZH8|OP164_ARATH(Outer envelope pore protein 16-4, chloroplastic OS=Arabidopsis thaliana OX=3702 GN=OEP164 PE=2 SV=1)
MsG0080048216.01	MsG0080048216.01		649	0.864543	-0.20999	0.483028	0.761103	no	down	0.88603	-0.174572	0.551141	0.807876	no	down	1.02082	0.029726	0.89287	0.999405	no	up	RHN81110.1(hypothetical protein MtrunA17_Chr1g0195481 [Medicago truncatula])	GO:0005840(cellular_component:ribosome); GO:1990904(cellular_component:ribonucleoprotein complex); GO:0005622(cellular_component:intracellular); GO:0003735(molecular_function:structural constituent of ribosome); GO:0003723(molecular_function:RNA binding); GO:0002181(biological_process:cytoplasmic translation); GO:0006412(biological_process:translation)	K02891	RP-L22e, RPL22	map03010(Ribosome)	ENOG4111UVJ(J:Translation, ribosomal structure and biogenesis)	ENOG4111UVJ(Ribosomal protein)	PF01776.20(Ribosomal_L22e:Ribosomal L22e protein family)	sp|Q9M9W1|RL222_ARATH(60S ribosomal protein L22-2 OS=Arabidopsis thaliana OX=3702 GN=RPL22B PE=2 SV=1)
MsG0080048217.01	MsG0080048217.01		573	3.89026	1.95987	0.627696	1	no	up	1.48247	0.567999	0.889293	1	no	up	0.382142	-1.38782	0.731338	1	no	down	AES70076.1(hypothetical protein MTR_3g047490 [Medicago truncatula])	GO:0003735(molecular_function:structural constituent of ribosome); GO:0032543(biological_process:mitochondrial translation); GO:0005762(cellular_component:mitochondrial large ribosomal subunit); GO:0019843(molecular_function:rRNA binding)	K02878	RP-L16, MRPL16, rplP	map03010(Ribosome)
MsG0080048218.01	MsG0080048218.01		860	1	0	1	1	no test	no test	1.48247	0.567999	0.889293	1	no	up	1.34376	0.426279	0.916798	1	no	up	XP_045828674.1(uncharacterized protein LOC123920464 [Trifolium pratense])	GO:0005794(cellular_component:Golgi apparatus)				ENOG4111D2M(S:Function unknown)	ENOG4111D2M(Pfam:DUF662)	PF04949.16(Transcrip_act:Transcriptional activator)
MsG0080048219.01	MsG0080048219.01		765	1	0	1	1	no	no change	1	0	1	1	no	no change	1	0	1	1	no test	no test	XP_039685072.1(protein RAE1 isoform X3 [Medicago truncatula])	GO:0005643(cellular_component:nuclear pore); GO:0000972(biological_process:transcription-dependent tethering of RNA polymerase II gene DNA at nuclear periphery); GO:0043130(molecular_function:ubiquitin binding); GO:0003723(molecular_function:RNA binding); GO:0005515(molecular_function:protein binding); GO:0006405(biological_process:RNA export from nucleus)	K14298	RAE1, GLE2	map03013(Nucleocytoplasmic transport)	ENOG410XQ1M(S:Function unknown)	ENOG410XQ1M(RAE1 RNA export 1 homolog (S. pombe))	PF00400.35(WD40:WD domain, G-beta repeat)	sp|Q38942|RAE1_ARATH(Protein RAE1 OS=Arabidopsis thaliana OX=3702 GN=RAE1 PE=1 SV=2)
MsG0080048220.01	MsG0080048220.01		1473	1.22418	0.291814	0.557968	0.806322	no	up	1.11736	0.160093	0.781103	0.924993	no	up	0.908722	-0.138089	0.804621	0.999405	no	down	XP_039685072.1(protein RAE1 isoform X3 [Medicago truncatula])	GO:0005643(cellular_component:nuclear pore); GO:0000786(cellular_component:nucleosome); GO:0000972(biological_process:transcription-dependent tethering of RNA polymerase II gene DNA at nuclear periphery); GO:0043130(molecular_function:ubiquitin binding); GO:0003723(molecular_function:RNA binding); GO:0005515(molecular_function:protein binding); GO:0003677(molecular_function:DNA binding); GO:00469…	K14298	RAE1, GLE2	map03013(Nucleocytoplasmic transport)	ENOG410XQ1M(S:Function unknown)	ENOG410XQ1M(RAE1 RNA export 1 homolog (S. pombe))	PF00125.27(Histone:Core histone H2A/H2B/H3/H4); PF00400.35(WD40:WD domain, G-beta repeat)	sp|Q38942|RAE1_ARATH(Protein RAE1 OS=Arabidopsis thaliana OX=3702 GN=RAE1 PE=1 SV=2)
MsG0080048221.01	MsG0080048221.01		612	0.557908	-0.841901	0.196111	0.490906	no	down	0.823162	-0.280752	0.613102	0.84509	no	down	1.46911	0.554943	0.399355	0.999405	no	up	GAU12760.1(hypothetical protein TSUD_122530 [Trifolium subterraneum])
MsG0080048222.01	MsG0080048222.01		687	0.251801	-1.98964	0.00197457	0.0244433	yes	down	0.918954	-0.121935	0.853134	0.953958	no	down	3.64424	1.86562	0.00590081	0.323675	no	up	GAU23513.1(hypothetical protein TSUD_39920 [Trifolium subterraneum])	GO:0005684(cellular_component:U2-type spliceosomal complex); GO:0008380(biological_process:RNA splicing); GO:0000398(biological_process:mRNA splicing, via spliceosome); GO:0071014(cellular_component:post-mRNA release spliceosomal complex)	K13115	CCDC130		COG5134(S:Function unknown)	COG5134(Coiled-coil domain-containing protein)	PF04502.16(Saf4_Yju2:Saf4/Yju2 protein)	sp|Q54WR5|YJU2_DICDI(Splicing factor YJU2 OS=Dictyostelium discoideum OX=44689 GN=yju2 PE=3 SV=1)
MsG0080048223.01	MsG0080048223.01		774	0.194569	-2.36165	0.0312431	0.166064	no	down	3.28896	1.71763	0.0757375	0.268216	no	up	16.8848	4.07765	0.000526336	0.084173	no	up	XP_039685072.1(protein RAE1 isoform X3 [Medicago truncatula])	GO:0005643(cellular_component:nuclear pore); GO:0000972(biological_process:transcription-dependent tethering of RNA polymerase II gene DNA at nuclear periphery); GO:0043130(molecular_function:ubiquitin binding); GO:0003723(molecular_function:RNA binding); GO:0005515(molecular_function:protein binding); GO:0006405(biological_process:RNA export from nucleus)	K14298	RAE1, GLE2	map03013(Nucleocytoplasmic transport)	ENOG410XQ1M(S:Function unknown)	ENOG410XQ1M(RAE1 RNA export 1 homolog (S. pombe))	PF00400.35(WD40:WD domain, G-beta repeat)	sp|Q38942|RAE1_ARATH(Protein RAE1 OS=Arabidopsis thaliana OX=3702 GN=RAE1 PE=1 SV=2)
MsG0080048224.01	MsG0080048224.01		612	0.684698	-0.546461	0.189272	0.481579	no	down	1.2024	0.265917	0.463129	0.748125	no	up	1.74927	0.806749	0.0433999	0.694063	no	up	GAU12760.1(hypothetical protein TSUD_122530 [Trifolium subterraneum])
MsG0080048225.01	MsG0080048225.01		573	18.4456	4.2052	0.0780483	1	no	up	35.4093	5.14605	0.00945021	1	no	up	1.93069	0.949115	0.446088	1	no	up	XP_039685151.1(uncharacterized protein LOC120577595 [Medicago truncatula])							PF05278.15(PEARLI-4:Arabidopsis phospholipase-like protein (PEARLI 4))
MsG0080048226.01	MsG0080048226.01		1195	0.637533	-0.649429	0.856872	0.950858	no	down	0.063772	-3.97093	0.0960547	0.312825	no	down	0.0999828	-3.32218	0.112651	1	no	down	KEH43427.1(galactose oxidase/kelch repeat protein [Medicago truncatula])	GO:0000326(cellular_component:protein storage vacuole); GO:0006886(biological_process:intracellular protein transport); GO:0005802(cellular_component:trans-Golgi network); GO:0005515(molecular_function:protein binding)				ENOG410Y5WM(S:Function unknown)	ENOG410Y5WM(Kelch domain containing)	PF13418.9(Kelch_4:Galactose oxidase, central domain)	sp|Q10AZ7|GPA3_ORYSJ(Protein GLUTELIN PRECURSOR ACCUMULATION 3 OS=Oryza sativa subsp. japonica OX=39947 GN=GPA3 PE=1 SV=1)
MsG0080048227.01	MsG0080048227.01		702	1.60471	0.682313	0.652996	1	no	up	2.07154	1.0507	0.420528	1	no	up	1.28697	0.363984	0.743988	1	no	up	XP_024640642.1(protein GLUTELIN PRECURSOR ACCUMULATION 3 isoform X2 [Medicago truncatula])	GO:0000326(cellular_component:protein storage vacuole); GO:0006886(biological_process:intracellular protein transport); GO:0005802(cellular_component:trans-Golgi network); GO:0005515(molecular_function:protein binding)				ENOG410Y5WM(S:Function unknown)	ENOG410Y5WM(Kelch domain containing)	PF13418.9(Kelch_4:Galactose oxidase, central domain)	sp|Q10AZ7|GPA3_ORYSJ(Protein GLUTELIN PRECURSOR ACCUMULATION 3 OS=Oryza sativa subsp. japonica OX=39947 GN=GPA3 PE=1 SV=1)
MsG0080048228.01	MsG0080048228.01		753	25.2107	4.65597	0.165868	1	no	up	16.7614	4.06707	0.156578	1	no	up	0.666153	-0.586075	0.781217	1	no	down	XP_024626750.1(ATP-dependent DNA helicase PIF1-like [Medicago truncatula])	GO:0000723(biological_process:telomere maintenance); GO:0016787(molecular_function:hydrolase activity); GO:0006281(biological_process:DNA repair); GO:0004386(molecular_function:helicase activity); GO:0006310(biological_process:DNA recombination); GO:0016887(molecular_function:ATPase activity); GO:0003678(molecular_function:DNA helicase activity); GO:0005524(molecular_function:ATP binding)	K15255	PIF1				PF05970.17(PIF1:PIF1-like helicase); PF02689.17(Herpes_Helicase:Helicase)	sp|Q0R4F1|PIF1_XENLA(ATP-dependent DNA helicase PIF1 OS=Xenopus laevis OX=8355 GN=pif1 PE=2 SV=1)
MsG0080048229.01	MsG0080048229.01		171	1	0	1	1	no test	no test	1	0	1	1	no test	no test	1	0	1	1	no test	no test	PNX63219.1(putative protein phosphatase 2C 8-like protein, partial [Trifolium pratense])	GO:0017018(molecular_function:myosin phosphatase activity); GO:0005634(cellular_component:nucleus); GO:0046872(molecular_function:metal ion binding); GO:0004722(molecular_function:protein serine/threonine phosphatase activity); GO:0035970(biological_process:peptidyl-threonine dephosphorylation)	K14497	PP2C	map04016(MAPK signaling pathway - plant); map04075(Plant hormone signal transduction)	COG0631(T:Signal transduction mechanisms)	COG0631(Phosphatase)		sp|Q0J2L7|P2C68_ORYSJ(Probable protein phosphatase 2C 68 OS=Oryza sativa subsp. japonica OX=39947 GN=Os09g0325700 PE=2 SV=2)
MsG0080048230.01	MsG0080048230.01		1365	19.7182	4.30145	4.0572e-24	1.21739e-20	yes	up	18.3716	4.19941	1.50256e-19	1.62286e-16	yes	up	0.928079	-0.107681	0.797678	0.999405	no	down	XP_013466357.1(protein phosphatase 2C 51 [Medicago truncatula])	GO:0017018(molecular_function:myosin phosphatase activity); GO:0043169(molecular_function:cation binding); GO:0005634(cellular_component:nucleus); GO:0004722(molecular_function:protein serine/threonine phosphatase activity); GO:0003824(molecular_function:catalytic activity); GO:0035970(biological_process:peptidyl-threonine dephosphorylation); GO:0046872(molecular_function:metal ion binding)	K14497	PP2C	map04016(MAPK signaling pathway - plant); map04075(Plant hormone signal transduction)	COG0631(T:Signal transduction mechanisms)	COG0631(Phosphatase)	PF00481.24(PP2C:Protein phosphatase 2C); PF13672.9(PP2C_2:Protein phosphatase 2C)	sp|Q65XK7|P2C51_ORYSJ(Protein phosphatase 2C 51 OS=Oryza sativa subsp. japonica OX=39947 GN=PP2C51 PE=1 SV=1)
MsG0080048231.01	MsG0080048231.01		1110	0.732106	-0.449876	0.372821	0.674343	no	down	0.591814	-0.756783	0.213913	0.505591	no	down	0.803466	-0.315691	0.594323	0.999405	no	down	XP_045831005.1(uncharacterized protein LOC123922324 [Trifolium pratense])	GO:0003677(molecular_function:DNA binding)						PF12776.10(Myb_DNA-bind_3:Myb/SANT-like DNA-binding domain)	sp|Q9FFJ8|LIMYB_ARATH(L10-interacting MYB domain-containing protein OS=Arabidopsis thaliana OX=3702 GN=LIMYB PE=1 SV=1)
MsG0080048232.01	MsG0080048232.01		3900	2.46956	1.30426	0.010068	0.0774283	no	up	2.31652	1.21196	0.0167379	0.0957746	no	up	0.933204	-0.0997352	0.73894	0.999405	no	down	XP_003588942.2(LRR receptor-like serine/threonine-protein kinase ERECTA [Medicago truncatula])	GO:0043169(molecular_function:cation binding); GO:0006468(biological_process:protein phosphorylation); GO:0033612(molecular_function:receptor serine/threonine kinase binding); GO:0016021(cellular_component:integral component of membrane); GO:0005515(molecular_function:protein binding); GO:0004672(molecular_function:protein kinase activity); GO:0005524(molecular_function:ATP binding)	K20718	ER	map04016(MAPK signaling pathway - plant)	COG4886(S:Function unknown)	COG4886(leucine Rich Repeat)	PF00069.28(Pkinase:Protein kinase domain); PF13855.9(LRR_8:Leucine rich repeat); PF07714.20(PK_Tyr_Ser-Thr:Protein tyrosine and serine/threonine kinase); PF12799.10(LRR_4:Leucine Rich repeats (2 copies)); PF08263.15(LRRNT_2:Leucine rich repeat N-terminal domain)	sp|Q42371|ERECT_ARATH(LRR receptor-like serine/threonine-protein kinase ERECTA OS=Arabidopsis thaliana OX=3702 GN=ERECTA PE=1 SV=1)
MsG0080048233.01	MsG0080048233.01		564	0.564352	-0.825332	0.839711	1	no	down	1.42659	0.512573	0.898961	1	no	up	2.53485	1.3419	0.739525	1	no	up	XP_003588943.2(FT-interacting protein 3 [Medicago truncatula])	GO:0016021(cellular_component:integral component of membrane); GO:0016757(molecular_function:transferase activity, transferring glycosyl groups)				ENOG410XRQN(S:Function unknown)	ENOG410XRQN(Multiple C2 and transmembrane domain-containing protein)	PF00168.33(C2:C2 domain)	sp|Q60EW9|FTIP7_ORYSJ(FT-interacting protein 7 OS=Oryza sativa subsp. japonica OX=39947 GN=FTIP7 PE=1 SV=1)
MsG0080048234.01	MsG0080048234.01		660	1	0	1	1	no test	no test	1	0	1	1	no test	no test	1	0	1	1	no test	no test	RHN44075.1(hypothetical protein MtrunA17_Chr7g0215401 [Medicago truncatula])
MsG0080048235.01	MsG0080048235.01		1437	1	0	1	1	no test	no test	1	0	1	1	no test	no test	1	0	1	1	no test	no test	KEH29542.1(hypothetical protein MTR_4g044687 [Medicago truncatula])
MsG0080048236.01	MsG0080048236.01		522	1	0	1	1	no test	no test	1	0	1	1	no test	no test	1	0	1	1	no test	no test	ABE87587.1(Protein of unknown function DUF889, eukaryote [Medicago truncatula])	GO:0000723(biological_process:telomere maintenance); GO:0006310(biological_process:DNA recombination); GO:0006281(biological_process:DNA repair); GO:0016787(molecular_function:hydrolase activity); GO:0004386(molecular_function:helicase activity); GO:0005657(cellular_component:replication fork); GO:0006260(biological_process:DNA replication); GO:0016887(molecular_function:ATPase activity); GO:0003…	K15255	PIF1				PF05970.17(PIF1:PIF1-like helicase); PF02689.17(Herpes_Helicase:Helicase)	sp|Q38CE9|PIF6_TRYB2(ATP-dependent DNA helicase PIF6 OS=Trypanosoma brucei brucei (strain 927/4 GUTat10.1) OX=185431 GN=PIF6 PE=3 SV=1)
MsG0080048237.01	MsG0080048237.01		759	1	0	1	1	no test	no test	1	0	1	1	no test	no test	1	0	1	1	no test	no test	XP_039683757.1(uncharacterized protein LOC25497733 [Medicago truncatula])	GO:0000723(biological_process:telomere maintenance); GO:0016787(molecular_function:hydrolase activity); GO:0006281(biological_process:DNA repair); GO:0006310(biological_process:DNA recombination); GO:0003678(molecular_function:DNA helicase activity); GO:0005524(molecular_function:ATP binding)	K15255	PIF1				PF05970.17(PIF1:PIF1-like helicase)
MsG0080048238.01	MsG0080048238.01		856	0.924604	-0.113093	0.650671	0.858492	no	down	0.823331	-0.280455	0.288316	0.593269	no	down	0.887588	-0.172038	0.38814	0.998221	no	down	XP_013465846.1(probable protein phosphatase 2C 59 [Medicago truncatula])	GO:0017018(molecular_function:myosin phosphatase activity); GO:0043169(molecular_function:cation binding); GO:0004722(molecular_function:protein serine/threonine phosphatase activity); GO:0003824(molecular_function:catalytic activity); GO:0035970(biological_process:peptidyl-threonine dephosphorylation); GO:0046872(molecular_function:metal ion binding)	K17506	PPM1L, PP2CE		COG0631(T:Signal transduction mechanisms)	COG0631(Phosphatase)	PF00481.24(PP2C:Protein phosphatase 2C)	sp|Q8RXV3|P2C59_ARATH(Probable protein phosphatase 2C 59 OS=Arabidopsis thaliana OX=3702 GN=WIN2 PE=1 SV=1)
MsG0080048239.01	MsG0080048239.01		267	1	0	1	1	no test	no test	1	0	1	1	no test	no test	1	0	1	1	no test	no test	RHN55719.1(hypothetical protein MtrunA17_Chr5g0421031 [Medicago truncatula])	GO:0016021(cellular_component:integral component of membrane)
MsG0080048240.01	MsG0080048240.01		2660	1.4497	0.535755	0.249996	0.551784	no	up	1.58915	0.668255	0.135545	0.388551	no	up	1.08981	0.124082	0.740517	0.999405	no	up	XP_013465817.2(trafficking protein particle complex II-specific subunit 120 homolog [Medicago truncatula])	GO:0005794(cellular_component:Golgi apparatus); GO:0005802(cellular_component:trans-Golgi network)	K20306	TRAPPC9, TRS120		ENOG410YEPC(S:Function unknown)	ENOG410YEPC(trafficking protein particle complex 9)	PF08626.14(TRAPPC9-Trs120:Transport protein Trs120 or TRAPPC9, TRAPP II complex subunit)	sp|Q9FY61|TR120_ARATH(Trafficking protein particle complex II-specific subunit 120 homolog OS=Arabidopsis thaliana OX=3702 GN=TRS120 PE=1 SV=1)
MsG0080048241.01	MsG0080048241.01		186	1	0	1	1	no test	no test	1	0	1	1	no test	no test	1	0	1	1	no test	no test	XP_003589219.2(probable protein phosphatase 2C 12 [Medicago truncatula])	GO:0004722(molecular_function:protein serine/threonine phosphatase activity); GO:0035970(biological_process:peptidyl-threonine dephosphorylation)				COG0631(T:Signal transduction mechanisms)	COG0631(Phosphatase)		sp|Q9FX08|P2C12_ARATH(Probable protein phosphatase 2C 12 OS=Arabidopsis thaliana OX=3702 GN=At1g47380 PE=2 SV=1)
MsG0080048242.01	MsG0080048242.01		240	1	0	1	1	no test	no test	1	0	1	1	no test	no test	1	0	1	1	no test	no test	XP_027332268.1(probable protein phosphatase 2C 12 [Abrus precatorius])
MsG0080048243.01	MsG0080048243.01		498	1.04752	0.0669747	0.905802	0.970811	no	up	1.23287	0.302024	0.502231	0.778552	no	up	1.17369	0.231057	0.67105	0.999405	no	up	KEH40042.1(catalytic/protein phosphatase type 2C [Medicago truncatula])	GO:0004722(molecular_function:protein serine/threonine phosphatase activity); GO:0035970(biological_process:peptidyl-threonine dephosphorylation)				COG0631(T:Signal transduction mechanisms)	COG0631(Phosphatase)		sp|Q9FX08|P2C12_ARATH(Probable protein phosphatase 2C 12 OS=Arabidopsis thaliana OX=3702 GN=At1g47380 PE=2 SV=1)
MsG0080048244.01	MsG0080048244.01		234	1	0	1	1	no test	no test	1	0	1	1	no test	no test	1	0	1	1	no test	no test	PNX71201.1(ribosomal protein [Trifolium pratense])	GO:0016740(molecular_function:transferase activity); GO:0005840(cellular_component:ribosome)
MsG0080048245.01	MsG0080048245.01		981	5.82847	2.54312	0.524611	1	no	up	1	0	1	1	no	no change	0.130995	-2.93242	0.463227	1	no	down	KEH22878.1(hypothetical protein MTR_7g461350 [Medicago truncatula])	GO:0003677(molecular_function:DNA binding)						PF14303.9(NAM-associated:No apical meristem-associated C-terminal domain)	sp|Q9FHE1|GSTT3_ARATH(Glutathione S-transferase T3 OS=Arabidopsis thaliana OX=3702 GN=GSTT3 PE=2 SV=1)
MsG0080048246.01	MsG0080048246.01		678	1	0	1	1	no test	no test	1	0	1	1	no test	no test	1	0	1	1	no test	no test	XP_024626845.1(uncharacterized protein LOC112416723 [Medicago truncatula])	GO:0008792(molecular_function:arginine decarboxylase activity); GO:0008270(molecular_function:zinc ion binding); GO:0003676(molecular_function:nucleic acid binding)						PF04434.20(SWIM:SWIM zinc finger)
MsG0080048247.01	MsG0080048247.01		1196	0.691639	-0.531909	0.327306	0.633511	no	down	0.911465	-0.133742	0.784931	0.926694	no	down	1.31389	0.393848	0.442863	0.999405	no	up	XP_003589220.1(origin of replication complex subunit 2 [Medicago truncatula])	GO:0003688(molecular_function:DNA replication origin binding); GO:0005634(cellular_component:nucleus); GO:0006260(biological_process:DNA replication); GO:0005664(cellular_component:nuclear origin of replication recognition complex); GO:0000808(cellular_component:origin recognition complex)	K02604	ORC2		COG5575(L:Replication, recombination and repair)	COG5575(origin recognition complex subunit)	PF04084.17(ORC2:Origin recognition complex subunit 2)	sp|Q38899|ORC2_ARATH(Origin of replication complex subunit 2 OS=Arabidopsis thaliana OX=3702 GN=ORC2 PE=1 SV=1)
MsG0080048248.01	MsG0080048248.01		1768	1.2404	0.310803	0.776966	0.918525	no	up	1.74168	0.80048	0.250316	0.548452	no	up	1.38335	0.468162	0.604809	0.999405	no	up	XP_039688671.1(F-box/kelch-repeat protein At3g23880-like [Medicago truncatula])	GO:0005515(molecular_function:protein binding)				ENOG410Z2HM(S:Function unknown); ENOG411130V(S:Function unknown)	ENOG410Z2HM(F-box Kelch-repeat protein); ENOG411130V(F-box protein)	PF00646.36(F-box:F-box domain)	sp|Q9LIR8|FBK67_ARATH(F-box/kelch-repeat protein At3g23880 OS=Arabidopsis thaliana OX=3702 GN=At3g23880 PE=2 SV=1)
MsG0080048249.01	MsG0080048249.01		3155	1.42732	0.513311	0.0851771	0.307696	no	up	1.36391	0.447754	0.152548	0.416955	no	up	0.951839	-0.0712108	0.796297	0.999405	no	down	XP_039688671.1(F-box/kelch-repeat protein At3g23880-like [Medicago truncatula])	GO:0006325(biological_process:chromatin organization); GO:0004407(molecular_function:histone deacetylase activity); GO:0005634(cellular_component:nucleus); GO:0016575(biological_process:histone deacetylation); GO:0006357(biological_process:regulation of transcription from RNA polymerase II promoter); GO:0005515(molecular_function:protein binding); GO:0046872(molecular_function:metal ion binding)	K06067	HDAC1_2		ENOG411130V(S:Function unknown); COG0123(B:Chromatin structure and dynamics); COG0123(Q:Secondary metabolites biosynthesis, transport and catabolism)	ENOG411130V(F-box protein); COG0123(Histone deacetylase); COG0123(Histone deacetylase)	PF00850.22(Hist_deacetyl:Histone deacetylase domain); PF07734.16(FBA_1:F-box associated); PF00646.36(F-box:F-box domain)	sp|Q8H0W2|HDA9_ARATH(Histone deacetylase 9 OS=Arabidopsis thaliana OX=3702 GN=HDA9 PE=1 SV=1)
MsG0080048250.01	MsG0080048250.01		252	1	0	1	1	no test	no test	4.03959	2.01421	0.614283	1	no	up	3.65911	1.87149	0.639603	1	no	up	RHN72564.1(putative succinate dehydrogenase (quinone) [Medicago truncatula])	GO:0015074(biological_process:DNA integration); GO:0016779(molecular_function:nucleotidyltransferase activity); GO:0004523(molecular_function:RNA-DNA hybrid ribonuclease activity); GO:0008177(molecular_function:succinate dehydrogenase (ubiquinone) activity); GO:0003676(molecular_function:nucleic acid binding)
MsG0080048251.01	MsG0080048251.01		1236	1	0	1	1	no test	no test	1	0	1	1	no test	no test	1	0	1	1	no test	no test	KEH16643.1(hypothetical protein MTR_0126s0010 [Medicago truncatula])							PF20167.1(Transposase_32:Putative plant transposon protein)
MsG0080048252.01	MsG0080048252.01		426	1	0	1	1	no test	no test	2.74914	1.45898	0.717879	1	no	up	2.48384	1.31257	0.745177	1	no	up	RHN79211.1(hypothetical protein MtrunA17_Chr1g0174681 [Medicago truncatula])
MsG0080048253.01	MsG0080048253.01		3368	1.96309	0.973123	0.0248221	0.143017	no	up	1.91206	0.935131	0.00887828	0.060688	no	up	0.972866	-0.0396868	0.92028	0.999405	no	down	XP_003631134.2(probable inactive receptor kinase At1g48480 [Medicago truncatula])	GO:0006468(biological_process:protein phosphorylation); GO:0016021(cellular_component:integral component of membrane); GO:0005524(molecular_function:ATP binding); GO:0004672(molecular_function:protein kinase activity)				ENOG410Y9HF(T:Signal transduction mechanisms)	ENOG410Y9HF(Inactive receptor kinase)	PF00069.28(Pkinase:Protein kinase domain); PF07714.20(PK_Tyr_Ser-Thr:Protein tyrosine and serine/threonine kinase); PF08263.15(LRRNT_2:Leucine rich repeat N-terminal domain); PF13855.9(LRR_8:Leucine rich repeat); PF12799.10(LRR_4:Leucine Rich repeats (2 copies))	sp|Q9LP77|Y1848_ARATH(Probable inactive receptor kinase At1g48480 OS=Arabidopsis thaliana OX=3702 GN=RKL1 PE=1 SV=1)
MsG0080048254.01	MsG0080048254.01		3074	2.23189	1.15826	0.000252359	0.00537969	yes	up	1.35705	0.440477	0.106344	0.334905	no	up	0.606394	-0.721672	0.0134278	0.462338	no	down	XP_003604604.2(protein DEFECTIVE IN EXINE FORMATION 1 [Medicago truncatula])	GO:0016021(cellular_component:integral component of membrane); GO:0010584(biological_process:pollen exine formation); GO:0005515(molecular_function:protein binding)				ENOG410ZQCN(S:Function unknown)	ENOG410ZQCN(fg-gap repeat protein)	PF13517.9(FG-GAP_3:FG-GAP-like repeat); PF01839.26(FG-GAP:FG-GAP repeat)	sp|F4IYM4|DEX1_ARATH(Protein DEFECTIVE IN EXINE FORMATION 1 OS=Arabidopsis thaliana OX=3702 GN=DEX1 PE=2 SV=1)
MsG0080048255.01	MsG0080048255.01		1035	0.877796	-0.188043	0.65175	0.859188	no	down	0.712425	-0.489191	0.186526	0.467286	no	down	0.806938	-0.30947	0.433229	0.999405	no	down	KEH34898.1(transducin/WD40 repeat protein [Medicago truncatula])	GO:0005515(molecular_function:protein binding)				ENOG410Y2CG(S:Function unknown)	ENOG410Y2CG(WD-40 repeat family protein)	PF12894.10(ANAPC4_WD40:Anaphase-promoting complex subunit 4 WD40 domain)	sp|Q9Y7K5|YGI3_SCHPO(Uncharacterized WD repeat-containing protein C2A9.03 OS=Schizosaccharomyces pombe (strain 972 / ATCC 24843) OX=284812 GN=SPBC2A9.03 PE=4 SV=2)
MsG0080048256.01	MsG0080048256.01		1306	1.15743	0.210929	0.530527	0.789475	no	up	1.32697	0.408131	0.087167	0.294374	no	up	1.14323	0.193121	0.516965	0.999405	no	up	XP_003604587.1(elongation factor 1-alpha [Medicago truncatula])	GO:0003746(molecular_function:translation elongation factor activity); GO:0006414(biological_process:translational elongation); GO:0003924(molecular_function:GTPase activity); GO:0006412(biological_process:translation); GO:0005525(molecular_function:GTP binding)	K03231	EEF1A	map03013(Nucleocytoplasmic transport)	COG5256(J:Translation, ribosomal structure and biogenesis)	COG5256(This protein promotes the GTP-dependent binding of aminoacyl-tRNA to the A-site of ribosomes during protein biosynthesis (By similarity))	PF00009.30(GTP_EFTU:Elongation factor Tu GTP binding domain); PF03143.20(GTP_EFTU_D3:Elongation factor Tu C-terminal domain); PF03144.28(GTP_EFTU_D2:Elongation factor Tu domain 2); PF01926.26(MMR_HSR1:50S ribosome-binding GTPase)	sp|O64937|EF1A_ORYSJ(Elongation factor 1-alpha OS=Oryza sativa subsp. japonica OX=39947 GN=REFA1 PE=2 SV=2)
MsG0080048257.01	MsG0080048257.01		1578	2.14091	1.09822	0.787821	1	no	up	1	0	1	1	no test	no test	0.354222	-1.49727	0.713666	1	no	down	KEH43961.1(replication factor-A carboxy-terminal domain protein [Medicago truncatula])	GO:0006310(biological_process:DNA recombination); GO:0000723(biological_process:telomere maintenance); GO:0051321(biological_process:meiotic cell cycle); GO:0000724(biological_process:double-strand break repair via homologous recombination); GO:0043047(molecular_function:single-stranded telomeric DNA binding); GO:0005634(cellular_component:nucleus); GO:0006281(biological_process:DNA repair); GO:0…						PF08646.13(Rep_fac-A_C:Replication factor-A C terminal domain); PF16900.8(REPA_OB_2:Replication protein A OB domain); PF02721.17(DUF223:Domain of unknown function DUF223)
MsG0080048258.01	MsG0080048258.01		1214	2.04886	1.03482	0.371061	1	no	up	1.52848	0.612101	0.626718	1	no	up	0.742612	-0.429319	0.686987	1	no	down	XP_013456479.1(thaumatin-like protein 1 [Medicago truncatula])	GO:0006952(biological_process:defense response); GO:0016021(cellular_component:integral component of membrane)				ENOG410YD5Y(S:Function unknown)	ENOG410YD5Y(thaumatin-like protein)	PF00314.20(Thaumatin:Thaumatin family)	sp|A0A1P8B554|THLP1_ARATH(Thaumatin-like protein 1 OS=Arabidopsis thaliana OX=3702 GN=TLP1 PE=2 SV=1)
MsG0080048259.01	MsG0080048259.01		2149	1.31615	0.396324	0.572052	0.814018	no	up	1.45759	0.543582	0.52308	0.792311	no	up	1.10724	0.146969	0.831917	0.999405	no	up	XP_013456477.1(protein NUCLEAR FUSION DEFECTIVE 4 [Medicago truncatula])	GO:0016021(cellular_component:integral component of membrane); GO:0016020(cellular_component:membrane)				ENOG410Y7MY(S:Function unknown)	ENOG410Y7MY(nodulin family)		sp|F4I9E1|NFD4_ARATH(Protein NUCLEAR FUSION DEFECTIVE 4 OS=Arabidopsis thaliana OX=3702 GN=NFD4 PE=3 SV=1)
MsG0080048260.01	MsG0080048260.01		267	2.14091	1.09822	0.787821	1	no	up	1	0	1	1	no test	no test	0.354222	-1.49727	0.713666	1	no	down	ABN06136.1(RNA-directed DNA polymerase (Reverse transcriptase); Ribonuclease H [Medicago truncatula])	GO:0006310(biological_process:DNA recombination); GO:0005634(cellular_component:nucleus); GO:0004523(molecular_function:RNA-DNA hybrid ribonuclease activity); GO:0003887(molecular_function:DNA-directed DNA polymerase activity); GO:0015074(biological_process:DNA integration); GO:0030430(cellular_component:host cell cytoplasm); GO:0003723(molecular_function:RNA binding); GO:0003676(molecular_functi…
MsG0080048261.01	MsG0080048261.01		276	1	0	1	1	no test	no test	1	0	1	1	no test	no test	1	0	1	1	no test	no test	ABN06136.1(RNA-directed DNA polymerase (Reverse transcriptase); Ribonuclease H [Medicago truncatula])	GO:0006310(biological_process:DNA recombination); GO:0005634(cellular_component:nucleus); GO:0004523(molecular_function:RNA-DNA hybrid ribonuclease activity); GO:0003887(molecular_function:DNA-directed DNA polymerase activity); GO:0015074(biological_process:DNA integration); GO:0030430(cellular_component:host cell cytoplasm); GO:0003723(molecular_function:RNA binding); GO:0003676(molecular_functi…
MsG0080048262.01	MsG0080048262.01		609	1	0	1	1	no test	no test	1	0	1	1	no test	no test	1	0	1	1	no test	no test	KEH22424.1(hypothetical protein MTR_7g046515 [Medicago truncatula])	GO:0006508(biological_process:proteolysis); GO:0004190(molecular_function:aspartic-type endopeptidase activity)
MsG0080048263.01	MsG0080048263.01		477	1	0	1	1	no test	no test	1	0	1	1	no test	no test	1	0	1	1	no test	no test	RHN77304.1(putative RNA-directed DNA polymerase [Medicago truncatula])	GO:0003964(molecular_function:RNA-directed DNA polymerase activity); GO:0015074(biological_process:DNA integration); GO:0008270(molecular_function:zinc ion binding); GO:0003676(molecular_function:nucleic acid binding); GO:0003899(molecular_function:DNA-directed RNA polymerase activity)				COG2801(L:Replication, recombination and repair)	COG2801(Retrotransposon protein)		sp|P04146|COPIA_DROME(Copia protein OS=Drosophila melanogaster OX=7227 GN=GIP PE=1 SV=3)
MsG0080048264.01	MsG0080048264.01		321	1	0	1	1	no test	no test	1	0	1	1	no test	no test	1	0	1	1	no test	no test	PNX95521.1(reverse transcriptase (RNA-dependent DNA polymerase) [Trifolium pratense])	GO:0003964(molecular_function:RNA-directed DNA polymerase activity); GO:0015074(biological_process:DNA integration); GO:0008270(molecular_function:zinc ion binding); GO:0003676(molecular_function:nucleic acid binding); GO:0003899(molecular_function:DNA-directed RNA polymerase activity)				COG2801(L:Replication, recombination and repair)	COG2801(Retrotransposon protein)		sp|Q94HW2|POLR1_ARATH(Retrovirus-related Pol polyprotein from transposon RE1 OS=Arabidopsis thaliana OX=3702 GN=RE1 PE=2 SV=1)
MsG0080048265.01	MsG0080048265.01		219	1	0	1	1	no test	no test	1	0	1	1	no test	no test	1	0	1	1	no test	no test	XP_013456628.1(mavicyanin [Medicago truncatula])	GO:0046658(cellular_component:anchored component of plasma membrane); GO:0016021(cellular_component:integral component of membrane); GO:0009055(molecular_function:electron carrier activity)				ENOG410YS9Y(S:Function unknown)	ENOG410YS9Y(Early nodulin-like protein)
MsG0080048266.01	MsG0080048266.01		546	0.278978	-1.84178	0.647538	1	no	down	0.377149	-1.40679	0.694944	1	no	down	1.34376	0.426279	0.916798	1	no	up	XP_013456628.1(mavicyanin [Medicago truncatula])	GO:0046658(cellular_component:anchored component of plasma membrane); GO:0016021(cellular_component:integral component of membrane); GO:0009055(molecular_function:electron carrier activity)				ENOG410YS9Y(S:Function unknown)	ENOG410YS9Y(Early nodulin-like protein)	PF02298.20(Cu_bind_like:Plastocyanin-like domain)	sp|Q9SK27|ENL1_ARATH(Early nodulin-like protein 1 OS=Arabidopsis thaliana OX=3702 GN=At2g25060 PE=2 SV=2)
MsG0080048267.01	MsG0080048267.01		1096	0.932957	-0.100117	0.741595	0.902872	no	down	0.903145	-0.14697	0.611409	0.843981	no	down	0.964444	-0.0522314	0.859355	0.999405	no	down	XP_024638487.1(WD repeat-containing protein 55 isoform X1 [Medicago truncatula])	GO:0005634(cellular_component:nucleus); GO:0005515(molecular_function:protein binding)	K24750	WDR55, JIP5		ENOG410ZHU5(S:Function unknown)	ENOG410ZHU5(WD repeatcontaining protein)	PF00400.35(WD40:WD domain, G-beta repeat); PF12894.10(ANAPC4_WD40:Anaphase-promoting complex subunit 4 WD40 domain)	sp|O80775|WDR55_ARATH(WD repeat-containing protein 55 OS=Arabidopsis thaliana OX=3702 GN=WDR55 PE=1 SV=2)
MsG0080048268.01	MsG0080048268.01		768	1	0	1	1	no test	no test	1	0	1	1	no test	no test	1	0	1	1	no test	no test	XP_013451635.2(transcription factor GTE6 [Medicago truncatula])	GO:0005515(molecular_function:protein binding)				COG5076(B:Chromatin structure and dynamics); COG5076(K:Transcription)	COG5076(bromodomain); COG5076(bromodomain)	PF00439.28(Bromodomain:Bromodomain)	sp|Q9FT54|GTE6_ARATH(Transcription factor GTE6 OS=Arabidopsis thaliana OX=3702 GN=GTE6 PE=2 SV=1)
MsG0080048269.01	MsG0080048269.01		459	1	0	1	1	no test	no test	1	0	1	1	no test	no test	1	0	1	1	no test	no test	GAU12803.1(hypothetical protein TSUD_72890, partial [Trifolium subterraneum])	GO:0005874(cellular_component:microtubule); GO:0007017(biological_process:microtubule-based process); GO:0005200(molecular_function:structural constituent of cytoskeleton); GO:0003924(molecular_function:GTPase activity); GO:0005525(molecular_function:GTP binding)	K07375	TUBB	map04145(Phagosome)	COG5023(Z:Cytoskeleton)	COG5023(protein polymerization)	PF00091.28(Tubulin:Tubulin/FtsZ family, GTPase domain); PF14881.9(Tubulin_3:Tubulin domain)	sp|P25862|TBB1_AVESA(Tubulin beta-1 chain (Fragment) OS=Avena sativa OX=4498 GN=TUBB1 PE=2 SV=1)
MsG0080048270.01	MsG0080048270.01		1086	0.949267	-0.0751143	0.981785	1	no	down	0.707906	-0.498371	0.881827	1	no	down	0.748752	-0.41744	0.916932	1	no	down	XP_024628620.1(glutathione S-transferase T3-like [Medicago truncatula])	GO:0016740(molecular_function:transferase activity); GO:0003677(molecular_function:DNA binding)				ENOG410YTD5(S:Function unknown)	ENOG410YTD5(-)	PF14303.9(NAM-associated:No apical meristem-associated C-terminal domain)	sp|Q9FHE1|GSTT3_ARATH(Glutathione S-transferase T3 OS=Arabidopsis thaliana OX=3702 GN=GSTT3 PE=2 SV=1)
MsG0080048271.01	MsG0080048271.01		1692	1.38066	0.465362	0.14374	0.415024	no	up	0.922488	-0.116398	0.72711	0.902103	no	down	0.665704	-0.587047	0.0502713	0.715295	no	down	XP_003631109.2(pentatricopeptide repeat-containing protein At2g01390 [Medicago truncatula])	GO:0005840(cellular_component:ribosome); GO:1990904(cellular_component:ribonucleoprotein complex); GO:0003735(molecular_function:structural constituent of ribosome); GO:0005515(molecular_function:protein binding); GO:0006412(biological_process:translation); GO:0003729(molecular_function:mRNA binding)				ENOG410Z7Z7(S:Function unknown)	ENOG410Z7Z7(Pentatricopeptide repeat-containing protein)	PF13041.9(PPR_2:PPR repeat family); PF01535.23(PPR:PPR repeat); PF13812.9(PPR_3:Pentatricopeptide repeat domain); PF12854.10(PPR_1:PPR repeat); PF17177.7(PPR_long:Pentacotripeptide-repeat region of PRORP); PF10037.12(MRP-S27:Mitochondrial 28S ribosomal protein S27)	sp|Q9ZU29|PP139_ARATH(Pentatricopeptide repeat-containing protein At2g01390 OS=Arabidopsis thaliana OX=3702 GN=At2g01390/At2g01380 PE=2 SV=2)
MsG0080048272.01	MsG0080048272.01		1341	0.609678	-0.713881	0.733512	1	no	down	0.593938	-0.751615	0.70897	1	no	down	0.968147	-0.0467022	0.983083	1	no	down	XP_003631111.1(tubulin beta chain [Medicago truncatula])	GO:0005737(cellular_component:cytoplasm); GO:0007017(biological_process:microtubule-based process); GO:0000278(biological_process:mitotic cell cycle); GO:0003924(molecular_function:GTPase activity); GO:0005200(molecular_function:structural constituent of cytoskeleton); GO:0000226(biological_process:microtubule cytoskeleton organization); GO:0016757(molecular_function:transferase activity, transfe…	K07375	TUBB	map04145(Phagosome)	COG5023(Z:Cytoskeleton)	COG5023(protein polymerization)	PF00091.28(Tubulin:Tubulin/FtsZ family, GTPase domain); PF03953.20(Tubulin_C:Tubulin C-terminal domain); PF10644.12(Misat_Tub_SegII:Misato Segment II tubulin-like domain)	sp|Q9ZPN7|TBB4_ELEIN(Tubulin beta-4 chain OS=Eleusine indica OX=29674 GN=TUBB4 PE=2 SV=1)
MsG0080048273.01	MsG0080048273.01		1136	1.04568	0.0644368	0.883199	0.962337	no	up	1.15177	0.203847	0.606082	0.840626	no	up	1.09911	0.136338	0.729876	0.999405	no	up	XP_003631113.1(ADP,ATP carrier protein ER-ANT1 [Medicago truncatula])	GO:0016021(cellular_component:integral component of membrane); GO:0140021(biological_process:mitochondrial ADP transmembrane transport); GO:0005471(molecular_function:ATP:ADP antiporter activity); GO:0005743(cellular_component:mitochondrial inner membrane); GO:0022857(molecular_function:transmembrane transporter activity); GO:1990544(biological_process:mitochondrial ATP transmembrane transport); …	K05863	SLC25A4S, ANT		ENOG410XNW0(U:Intracellular trafficking, secretion, and vesicular transport)	ENOG410XNW0(transmembrane transport)	PF00153.30(Mito_carr:Mitochondrial carrier protein)	sp|Q8LB08|ADT4_ARATH(ADP,ATP carrier protein ER-ANT1 OS=Arabidopsis thaliana OX=3702 GN=ER-ANT1 PE=2 SV=2)
MsG0080048274.01	MsG0080048274.01		717	1.59497	0.673532	0.702426	1	no	up	2.54758	1.34913	0.340952	0.646701	no	up	1.57543	0.655747	0.622271	0.999405	no	up	XP_003631113.1(ADP,ATP carrier protein ER-ANT1 [Medicago truncatula])	GO:0016021(cellular_component:integral component of membrane); GO:0140021(biological_process:mitochondrial ADP transmembrane transport); GO:0005471(molecular_function:ATP:ADP antiporter activity); GO:0005743(cellular_component:mitochondrial inner membrane); GO:0022857(molecular_function:transmembrane transporter activity); GO:1990544(biological_process:mitochondrial ATP transmembrane transport); …	K05863	SLC25A4S, ANT		ENOG410XNW0(U:Intracellular trafficking, secretion, and vesicular transport)	ENOG410XNW0(transmembrane transport)	PF00153.30(Mito_carr:Mitochondrial carrier protein)	sp|Q8LB08|ADT4_ARATH(ADP,ATP carrier protein ER-ANT1 OS=Arabidopsis thaliana OX=3702 GN=ER-ANT1 PE=2 SV=2)
MsG0080048275.01	MsG0080048275.01		1062	2.38736	1.25541	5.58789e-05	0.0016776	yes	up	2.11625	1.08151	0.011835	0.0740872	no	up	0.882997	-0.179519	0.639613	0.999405	no	down	KEH21426.1(translocon at the outer membrane ofs-like protein [Medicago truncatula])	GO:0050567(molecular_function:glutaminyl-tRNA synthase (glutamine-hydrolyzing) activity); GO:0004040(molecular_function:amidase activity); GO:0043864(molecular_function:indoleacetamide hydrolase activity); GO:0016021(cellular_component:integral component of membrane); GO:0031359(cellular_component:integral component of chloroplast outer membrane); GO:0015031(biological_process:protein transport)				COG0154(J:Translation, ribosomal structure and biogenesis)	COG0154(Allows the formation of correctly charged Gln-tRNA(Gln) through the transamidation of misacylated Glu-tRNA(Gln) in organisms which lack glutaminyl-tRNA synthetase. The reaction takes place in the presence of glutamine and ATP through an activated gamma-phospho-Glu-tRNA(Gln) (By similarity))	PF01425.24(Amidase:Amidase)	sp|Q9MUK5|TOC64_PEA(Translocon at the outer membrane of chloroplasts 64 OS=Pisum sativum OX=3888 GN=TOC64 PE=1 SV=1)
MsG0080048276.01	MsG0080048276.01		159	0.86025	-0.217173	0.651367	0.858945	no	down	1.16746	0.223373	0.618254	0.847632	no	up	1.35228	0.43539	0.312188	0.982621	no	up	XP_013456843.1(sm-like protein LSM8 [Medicago truncatula])	GO:0016070(biological_process:RNA metabolic process); GO:0046540(cellular_component:U4/U6 x U5 tri-snRNP complex); GO:0071011(cellular_component:precatalytic spliceosome); GO:0000398(biological_process:mRNA splicing, via spliceosome); GO:0003723(molecular_function:RNA binding); GO:0005688(cellular_component:U6 snRNP); GO:0005681(cellular_component:spliceosomal complex)	K12627	LSM8	map03018(RNA degradation); map03040(Spliceosome)	ENOG41124H7(K:Transcription)	ENOG41124H7(N(alpha)-acetyltransferase 38, NatC auxiliary)	PF01423.25(LSM:LSM domain)	sp|Q8VYI0|LSM8_ARATH(Sm-like protein LSM8 OS=Arabidopsis thaliana OX=3702 GN=LSM8 PE=1 SV=1)
MsG0080048277.01	MsG0080048277.01		483	1	0	1	1	no test	no test	1	0	1	1	no test	no test	1	0	1	1	no test	no test	XP_045821944.1(RING-H2 finger protein ATL74-like [Trifolium pratense])	GO:0016021(cellular_component:integral component of membrane)				ENOG41121N2(O:Posttranslational modification, protein turnover, chaperones)	ENOG41121N2(zinc ion binding)	PF13639.9(zf-RING_2:Ring finger domain); PF13923.9(zf-C3HC4_2:Zinc finger, C3HC4 type (RING finger)); PF13445.9(zf-RING_UBOX:RING-type zinc-finger); PF00097.28(zf-C3HC4:Zinc finger, C3HC4 type (RING finger)); PF12678.10(zf-rbx1:RING-H2 zinc finger domain); PF17123.8(zf-RING_11:RING-like zinc finger); PF14447.9(Prok-RING_4:Prokaryotic RING finger family 4); PF12861.10(zf-ANAPC11:Anaphase-promoting…	sp|F4I2Y3|RMR3_ARATH(Receptor homology region, transmembrane domain- and RING domain-containing protein 3 OS=Arabidopsis thaliana OX=3702 GN=RMR3 PE=3 SV=1)
MsG0080048278.01	MsG0080048278.01		255	1	0	1	1	no test	no test	1	0	1	1	no test	no test	1	0	1	1	no test	no test	RHN61506.1(putative chromatin regulator PHD family [Medicago truncatula])	GO:0016021(cellular_component:integral component of membrane)				ENOG41121N2(O:Posttranslational modification, protein turnover, chaperones)	ENOG41121N2(zinc ion binding)	PF13639.9(zf-RING_2:Ring finger domain); PF13923.9(zf-C3HC4_2:Zinc finger, C3HC4 type (RING finger)); PF13445.9(zf-RING_UBOX:RING-type zinc-finger); PF00097.28(zf-C3HC4:Zinc finger, C3HC4 type (RING finger)); PF12678.10(zf-rbx1:RING-H2 zinc finger domain); PF17123.8(zf-RING_11:RING-like zinc finger); PF14447.9(Prok-RING_4:Prokaryotic RING finger family 4); PF14634.9(zf-RING_5:zinc-RING finger dom…	sp|F4I2Y3|RMR3_ARATH(Receptor homology region, transmembrane domain- and RING domain-containing protein 3 OS=Arabidopsis thaliana OX=3702 GN=RMR3 PE=3 SV=1)
MsG0080048279.01	MsG0080048279.01		2049	1.40921	0.49489	0.0430204	0.203569	no	up	1.2818	0.358173	0.186501	0.467273	no	up	0.906002	-0.142413	0.521112	0.999405	no	down	AFK44469.1(unknown [Medicago truncatula])	GO:0000049(molecular_function:tRNA binding); GO:0003729(molecular_function:mRNA binding); GO:0022627(cellular_component:cytosolic small ribosomal subunit); GO:0043022(molecular_function:ribosome binding); GO:0003743(molecular_function:translation initiation factor activity)	K15026	EIF2A		COG5354(J:Translation, ribosomal structure and biogenesis)	COG5354(Component of the eukaryotic translation initiation factor 3 (eIF-3) complex, which is involved in protein synthesis and, together with other initiation factors, stimulates binding of mRNA and methionyl-tRNAi to the 40S ribosome (By similarity))	PF08662.14(eIF2A:Eukaryotic translation initiation factor eIF2A); PF12894.10(ANAPC4_WD40:Anaphase-promoting complex subunit 4 WD40 domain)	sp|O74965|EIF2A_SCHPO(Eukaryotic translation initiation factor 2A OS=Schizosaccharomyces pombe (strain 972 / ATCC 24843) OX=284812 GN=SPBC4B4.04 PE=1 SV=1)
MsG0080048280.01	MsG0080048280.01		1377	0.692836	-0.529415	0.164687	0.446941	no	down	0.834434	-0.261129	0.45961	0.745734	no	down	1.19842	0.261138	0.324727	0.988198	no	up	XP_013456891.1(something about silencing protein 10 isoform X2 [Medicago truncatula])	GO:0000462(biological_process:maturation of SSU-rRNA from tricistronic rRNA transcript (SSU-rRNA, 5.8S rRNA, LSU-rRNA)); GO:0032040(cellular_component:small-subunit processome); GO:1990904(cellular_component:ribonucleoprotein complex); GO:0005730(cellular_component:nucleolus)	K14767	UTP3, SAS10		ENOG410XSPX(S:Function unknown)	ENOG410XSPX(UTP3, small subunit (SSU) processome component, homolog (S. cerevisiae))	PF04000.18(Sas10_Utp3:Sas10/Utp3/C1D family)	sp|Q8L3P4|THAL_ARATH(Protein THALLO OS=Arabidopsis thaliana OX=3702 GN=THAL PE=1 SV=1)
MsG0080048281.01	MsG0080048281.01		819	1.71141	0.775183	0.223066	0.523543	no	up	1.82829	0.870494	0.270067	0.572462	no	up	1.06226	0.0871309	0.905545	0.999405	no	up	XP_003608059.2(DNA polymerase I, thermostable isoform X1 [Medicago truncatula])	GO:0016787(molecular_function:hydrolase activity); GO:0006302(biological_process:double-strand break repair); GO:0004527(molecular_function:exonuclease activity); GO:0003887(molecular_function:DNA-directed DNA polymerase activity); GO:0006261(biological_process:DNA-dependent DNA replication); GO:0003677(molecular_function:DNA binding)				COG0258(L:Replication, recombination and repair)	COG0258(Structure-specific nuclease with 5'-flap endonuclease and 5'-3' exonuclease activities involved in DNA replication and repair. During DNA replication, cleaves the 5'-overhanging flap structure that is generated by displacement synthesis when DNA polymerase encounters the 5'-end of a downstream Okazaki fragment. It enters the flap from the 5'-end and then tracks to cleave the flap base, le…	PF02739.19(5_3_exonuc_N:5'-3' exonuclease, N-terminal resolvase-like domain)	sp|P00582|DPO1_ECOLI(DNA polymerase I OS=Escherichia coli (strain K12) OX=83333 GN=polA PE=1 SV=1)
MsG0080048282.01	MsG0080048282.01		1152	1.0992	0.136449	0.973324	1	no	up	2.09719	1.06846	0.756896	1	no	up	1.90428	0.929246	0.788779	1	no	up	XP_024634222.1(putative F-box protein At3g16210 [Medicago truncatula])								sp|Q8GXC7|FBK50_ARATH(F-box/kelch-repeat protein At3g06240 OS=Arabidopsis thaliana OX=3702 GN=At3g06240 PE=2 SV=1)
MsG0080048283.01	MsG0080048283.01		825	0.320528	-1.64148	0.0565351	0.238746	no	down	0.251462	-1.99159	0.0500751	0.203873	no	down	0.780485	-0.357557	0.765364	1	no	down	XP_003606331.2(transcription factor FER-LIKE IRON DEFICIENCY-INDUCED TRANSCRIPTION FACTOR [Medicago truncatula])	GO:0003700(molecular_function:transcription factor activity, sequence-specific DNA binding); GO:0043565(molecular_function:sequence-specific DNA binding); GO:0046983(molecular_function:protein dimerization activity); GO:0005634(cellular_component:nucleus); GO:0006355(biological_process:regulation of transcription, DNA-templated)				ENOG410YQ9Q(K:Transcription)	ENOG410YQ9Q(Transcription factor)	PF00010.29(HLH:Helix-loop-helix DNA-binding domain)	sp|Q0V7X4|FIT_ARATH(Transcription factor FER-LIKE IRON DEFICIENCY-INDUCED TRANSCRIPTION FACTOR OS=Arabidopsis thaliana OX=3702 GN=FIT PE=1 SV=1)
MsG0080048284.01	MsG0080048284.01		1406	0.278702	-1.84321	0.0563104	0.238146	no	down	0.262131	-1.93164	0.0238019	0.122246	no	down	0.938865	-0.0910097	0.936957	0.999405	no	down	XP_003606331.2(transcription factor FER-LIKE IRON DEFICIENCY-INDUCED TRANSCRIPTION FACTOR [Medicago truncatula])	GO:0003700(molecular_function:transcription factor activity, sequence-specific DNA binding); GO:0043565(molecular_function:sequence-specific DNA binding); GO:0046983(molecular_function:protein dimerization activity); GO:0005634(cellular_component:nucleus); GO:0006355(biological_process:regulation of transcription, DNA-templated)				ENOG410YQ9Q(K:Transcription)	ENOG410YQ9Q(Transcription factor)	PF00010.29(HLH:Helix-loop-helix DNA-binding domain)	sp|Q0V7X4|FIT_ARATH(Transcription factor FER-LIKE IRON DEFICIENCY-INDUCED TRANSCRIPTION FACTOR OS=Arabidopsis thaliana OX=3702 GN=FIT PE=1 SV=1)
MsG0080048285.01	MsG0080048285.01		1485	1	0	1	1	no test	no test	1	0	1	1	no test	no test	1	0	1	1	no test	no test	XP_024636869.2(increased DNA methylation 1-like [Medicago truncatula])	GO:0003682(molecular_function:chromatin binding); GO:0005634(cellular_component:nucleus); GO:0004402(molecular_function:histone acetyltransferase activity); GO:0016740(molecular_function:transferase activity); GO:0016407(molecular_function:acetyltransferase activity); GO:0042393(molecular_function:histone binding); GO:0045944(biological_process:positive regulation of transcription from RNA polyme…				ENOG410Y9P5(S:Function unknown)	ENOG410Y9P5(acyl-CoA N-acyltransferase with RING FYVE PHD-type zinc finger domain-containing protein)	PF00628.32(PHD:PHD-finger)	sp|F4IXE7|IDM1_ARATH(Increased DNA methylation 1 OS=Arabidopsis thaliana OX=3702 GN=IDM1 PE=1 SV=1)
MsG0080048286.01	MsG0080048286.01		2469	1	0	1	1	no test	no test	2.73717	1.45268	0.719083	1	no	up	2.48835	1.31519	0.744673	1	no	up	XP_013455924.1(DNA ligase 1 [Medicago truncatula])	GO:0006310(biological_process:DNA recombination); GO:0005737(cellular_component:cytoplasm); GO:0071897(biological_process:DNA biosynthetic process); GO:0006281(biological_process:DNA repair); GO:0006273(biological_process:lagging strand elongation); GO:0005634(cellular_component:nucleus); GO:0051103(biological_process:DNA ligation involved in DNA repair); GO:0006266(biological_process:DNA ligatio…	K10747	LIG1	map03430(Mismatch repair); map03410(Base excision repair); map03420(Nucleotide excision repair); map03030(DNA replication)	COG1793(L:Replication, recombination and repair)	COG1793(DNA ligase)	PF01068.24(DNA_ligase_A_M:ATP dependent DNA ligase domain); PF04675.17(DNA_ligase_A_N:DNA ligase N terminus); PF04679.18(DNA_ligase_A_C:ATP dependent DNA ligase C terminal region)	sp|Q42572|DNLI1_ARATH(DNA ligase 1 OS=Arabidopsis thaliana OX=3702 GN=LIG1 PE=2 SV=2)
MsG0080048287.01	MsG0080048287.01		315	1.06563	0.0917025	0.915059	0.973781	no	up	0.400403	-1.32047	0.415175	0.708872	no	down	0.370504	-1.43244	0.323965	0.988198	no	down	KAH1250755.1(hypothetical protein GmHk_05G013835 [Glycine max])		K03231	EEF1A	map03013(Nucleocytoplasmic transport)	ENOG410Y42B(S:Function unknown)	ENOG410Y42B(-)
MsG0080048288.01	MsG0080048288.01		333	0.564352	-0.825332	0.839711	1	no	down	40.3595	5.33484	0.00698172	0.0511929	no	up	71.6367	6.16263	0.115129	0.885358	no	up	KAH1250755.1(hypothetical protein GmHk_05G013835 [Glycine max])		K03231	EEF1A	map03013(Nucleocytoplasmic transport)	ENOG410Y42B(S:Function unknown)	ENOG410Y42B(-)
MsG0080048289.01	MsG0080048289.01		2942	0.990086	-0.0143746	0.961487	0.989352	no	down	0.957907	-0.0620418	0.870837	0.960541	no	down	0.963211	-0.0540766	0.8746	0.999405	no	down	XP_013455924.1(DNA ligase 1 [Medicago truncatula])	GO:0006310(biological_process:DNA recombination); GO:0005737(cellular_component:cytoplasm); GO:0071897(biological_process:DNA biosynthetic process); GO:0006281(biological_process:DNA repair); GO:0006273(biological_process:lagging strand elongation); GO:0005634(cellular_component:nucleus); GO:0051103(biological_process:DNA ligation involved in DNA repair); GO:0006266(biological_process:DNA ligatio…	K10747	LIG1	map03430(Mismatch repair); map03410(Base excision repair); map03420(Nucleotide excision repair); map03030(DNA replication)	COG1793(L:Replication, recombination and repair)	COG1793(DNA ligase)	PF01068.24(DNA_ligase_A_M:ATP dependent DNA ligase domain); PF04675.17(DNA_ligase_A_N:DNA ligase N terminus); PF04679.18(DNA_ligase_A_C:ATP dependent DNA ligase C terminal region); PF09414.13(RNA_ligase:RNA ligase)	sp|Q42572|DNLI1_ARATH(DNA ligase 1 OS=Arabidopsis thaliana OX=3702 GN=LIG1 PE=2 SV=2)
MsG0080048290.01	MsG0080048290.01		1487	1.26174	0.335419	0.447169	0.735261	no	up	1.13936	0.188227	0.63447	0.857444	no	up	0.901679	-0.149314	0.717273	0.999405	no	down	XP_003606344.1(uncharacterized protein LOC11406428 [Medicago truncatula])					ENOG410YWC0(S:Function unknown); ENOG410YJVG(S:Function unknown)	ENOG410YWC0(Protein of unknown function (DUF1635)); ENOG410YJVG(Protein of unknown function (DUF1635))	PF07795.14(DUF1635:Protein of unknown function (DUF1635))
MsG0080048291.01	MsG0080048291.01		702	0.576816	-0.793817	0.299107	0.605053	no	down	0.669286	-0.579304	0.460625	0.746312	no	down	1.15248	0.204743	0.713594	0.999405	no	up	XP_003606349.2(shugoshin-1 [Medicago truncatula])	GO:0034090(biological_process:maintenance of meiotic sister chromatid cohesion); GO:0005634(cellular_component:nucleus); GO:0045132(biological_process:meiotic chromosome segregation); GO:0000775(cellular_component:chromosome, centromeric region)				ENOG410YNQ1(S:Function unknown)	ENOG410YNQ1(-)	PF07557.14(Shugoshin_C:Shugoshin C terminus)	sp|Q0WTB8|SGO2_ARATH(SHUGOSHIN 2 OS=Arabidopsis thaliana OX=3702 GN=SGO2 PE=2 SV=1)
MsG0080048292.01	MsG0080048292.01		3648	0.962578	-0.0550242	0.863627	0.953308	no	down	0.990555	-0.0136906	0.969758	0.991722	no	down	1.02602	0.037063	0.909142	0.999405	no	up	XP_039689534.1(DDT domain-containing protein PTM [Medicago truncatula])	GO:0005634(cellular_component:nucleus); GO:0046872(molecular_function:metal ion binding); GO:0003677(molecular_function:DNA binding)				ENOG410YFBB(S:Function unknown)	ENOG410YFBB(DDT domain)	PF00628.32(PHD:PHD-finger); PF15612.9(WHIM1:WSTF, HB1, Itc1p, MBD9 motif 1)	sp|F4JYC8|PTM_ARATH(DDT domain-containing protein PTM OS=Arabidopsis thaliana OX=3702 GN=PTM PE=1 SV=1)
MsG0080048293.01	MsG0080048293.01		276	1	0	1	1	no test	no test	1	0	1	1	no test	no test	1	0	1	1	no test	no test	XP_013452715.2(ribonuclease 1 [Medicago truncatula])	GO:0033897(molecular_function:ribonuclease T2 activity); GO:0016021(cellular_component:integral component of membrane); GO:0004521(molecular_function:endoribonuclease activity); GO:0005576(cellular_component:extracellular region); GO:0003723(molecular_function:RNA binding); GO:0006401(biological_process:RNA catabolic process)	K01166	RNASET2				PF00445.21(Ribonuclease_T2:Ribonuclease T2 family)
MsG0080048294.01	MsG0080048294.01		987	1.0992	0.136449	0.973324	1	no	up	2.07403	1.05243	0.792299	1	no	up	1.87868	0.909721	0.819945	1	no	up	XP_003606296.2(putative F-box protein At3g21120 [Medicago truncatula])							PF07734.16(FBA_1:F-box associated)	sp|Q9LUJ6|FB176_ARATH(Putative F-box protein At3g22650 OS=Arabidopsis thaliana OX=3702 GN=At3g22650 PE=4 SV=1)
MsG0080048295.01	MsG0080048295.01		1644	0.800123	-0.321707	0.696273	0.882148	no	down	0.687027	-0.541561	0.469895	0.753563	no	down	0.855875	-0.224529	0.771911	0.999405	no	down	AES88501.2(DNA-binding and zinc-finger protein [Medicago truncatula])	GO:0033897(molecular_function:ribonuclease T2 activity); GO:0005634(cellular_component:nucleus); GO:0046872(molecular_function:metal ion binding); GO:0003723(molecular_function:RNA binding); GO:0003677(molecular_function:DNA binding)				ENOG410YFBB(S:Function unknown)	ENOG410YFBB(DDT domain)	PF00445.21(Ribonuclease_T2:Ribonuclease T2 family)	sp|P04007|RNS2_NICAL(Ribonuclease S-2 OS=Nicotiana alata OX=4087 GN=S-2 PE=1 SV=1)
MsG0080048296.01	MsG0080048296.01		2978	1.20841	0.273108	0.616733	0.840487	no	up	1.3169	0.397143	0.458939	0.745211	no	up	1.08376	0.116039	0.798932	0.999405	no	up	XP_013455876.2(F-box/LRR-repeat protein At4g14103 [Medicago truncatula])	GO:0016021(cellular_component:integral component of membrane); GO:0005515(molecular_function:protein binding)						PF08387.13(FBD:FBD); PF00646.36(F-box:F-box domain); PF12937.10(F-box-like:F-box-like)	sp|Q3EAE5|FDL24_ARATH(Putative F-box/FBD/LRR-repeat protein At4g00315 OS=Arabidopsis thaliana OX=3702 GN=At4g00315 PE=4 SV=1)
MsG0080048297.01	MsG0080048297.01		240	1	0	1	1	no test	no test	1	0	1	1	no test	no test	1	0	1	1	no test	no test	XP_045791375.1(ATP-dependent DNA helicase PIF1-like [Trifolium pratense])	GO:0006310(biological_process:DNA recombination); GO:0000723(biological_process:telomere maintenance); GO:0006281(biological_process:DNA repair); GO:0016787(molecular_function:hydrolase activity); GO:0005634(cellular_component:nucleus); GO:0004386(molecular_function:helicase activity); GO:0016887(molecular_function:ATPase activity); GO:0003677(molecular_function:DNA binding); GO:0003678(molecular…	K15255	PIF1		ENOG410XWH8(S:Function unknown); COG0507(L:Replication, recombination and repair)	ENOG410XWH8(Pfam:DUF889); COG0507(exodeoxyribonuclease v alpha)		sp|Q38CE9|PIF6_TRYB2(ATP-dependent DNA helicase PIF6 OS=Trypanosoma brucei brucei (strain 927/4 GUTat10.1) OX=185431 GN=PIF6 PE=3 SV=1)
MsG0080048298.01	MsG0080048298.01		1344	1.42229	0.508212	0.163335	0.445103	no	up	1.402	0.487483	0.163505	0.433286	no	up	0.981298	-0.0272374	0.935674	0.999405	no	down	XP_039684701.1(DNA-directed RNA polymerases IV and V subunit 2 isoform X1 [Medicago truncatula])	GO:0003677(molecular_function:DNA binding); GO:0000428(cellular_component:DNA-directed RNA polymerase complex); GO:0005665(cellular_component:DNA-directed RNA polymerase II, core complex); GO:0006351(biological_process:transcription, DNA-templated); GO:0032549(molecular_function:ribonucleoside binding); GO:0003899(molecular_function:DNA-directed RNA polymerase activity); GO:0046872(molecular_func…	K16252	NRPD2, NRPE2	map03020(RNA polymerase)	COG0085(K:Transcription)	COG0085(DNA-dependent RNA polymerase catalyzes the transcription of DNA into RNA using the four ribonucleoside triphosphates as substrates (By similarity))	PF04563.18(RNA_pol_Rpb2_1:RNA polymerase beta subunit); PF04565.19(RNA_pol_Rpb2_3:RNA polymerase Rpb2, domain 3); PF04566.16(RNA_pol_Rpb2_4:RNA polymerase Rpb2, domain 4); PF04561.17(RNA_pol_Rpb2_2:RNA polymerase Rpb2, domain 2)	sp|Q9LK40|NRPD2_ARATH(DNA-directed RNA polymerases IV and V subunit 2 OS=Arabidopsis thaliana OX=3702 GN=NRPD2 PE=1 SV=1)
MsG0080048299.01	MsG0080048299.01		663	0.560436	-0.835379	0.193581	0.487917	no	down	0.54289	-0.881269	0.260254	0.561593	no	down	0.967179	-0.0481454	0.94491	0.999405	no	down	XP_003605655.2(ethylene-responsive transcription factor ERF038 [Medicago truncatula])	GO:0003700(molecular_function:transcription factor activity, sequence-specific DNA binding); GO:0006355(biological_process:regulation of transcription, DNA-templated); GO:0005634(cellular_component:nucleus); GO:0003677(molecular_function:DNA binding)	K09286	EREBP		ENOG4111AQ4(S:Function unknown)	ENOG4111AQ4(AP2)	PF00847.23(AP2:AP2 domain)	sp|Q1ECI2|ERF23_ARATH(Ethylene-responsive transcription factor ERF023 OS=Arabidopsis thaliana OX=3702 GN=ERF023 PE=2 SV=1)
MsG0080048300.01	MsG0080048300.01		1800	1	0	1	1	no test	no test	1	0	1	1	no test	no test	1	0	1	1	no test	no test	XP_003630017.1(cationic amino acid transporter 1 isoform X1 [Medicago truncatula])	GO:0006865(biological_process:amino acid transport); GO:0016021(cellular_component:integral component of membrane); GO:0005313(molecular_function:L-glutamate transmembrane transporter activity); GO:0016020(cellular_component:membrane); GO:0015171(molecular_function:amino acid transmembrane transporter activity); GO:0022857(molecular_function:transmembrane transporter activity); GO:0015189(molecul…	K03294	TC.APA		COG0531(E:Amino acid transport and metabolism)	COG0531(amino acid)	PF13520.9(AA_permease_2:Amino acid permease); PF00324.24(AA_permease:Amino acid permease); PF13906.9(AA_permease_C:C-terminus of AA_permease)	sp|Q84MA5|CAAT1_ARATH(Cationic amino acid transporter 1 OS=Arabidopsis thaliana OX=3702 GN=CAT1 PE=1 SV=1)
MsG0080048301.01	MsG0080048301.01		1104	2.64088	1.40102	0.0293852	0.159777	no	up	0.84854	-0.236946	0.700246	0.888942	no	down	0.320027	-1.64373	0.00152141	0.158982	no	down	XP_024628323.1(cationic amino acid transporter 1 [Medicago truncatula])	GO:0006865(biological_process:amino acid transport); GO:0016021(cellular_component:integral component of membrane); GO:0005313(molecular_function:L-glutamate transmembrane transporter activity); GO:0016020(cellular_component:membrane); GO:0015171(molecular_function:amino acid transmembrane transporter activity); GO:0022857(molecular_function:transmembrane transporter activity); GO:0015189(molecul…	K03294	TC.APA		COG0531(E:Amino acid transport and metabolism)	COG0531(amino acid)	PF13520.9(AA_permease_2:Amino acid permease); PF00324.24(AA_permease:Amino acid permease)	sp|Q84MA5|CAAT1_ARATH(Cationic amino acid transporter 1 OS=Arabidopsis thaliana OX=3702 GN=CAT1 PE=1 SV=1)
MsG0080048302.01	MsG0080048302.01		681	1.47837	0.564006	0.402746	0.698876	no	up	0.622606	-0.683609	0.340242	0.645874	no	down	0.419302	-1.25394	0.0430156	0.693364	no	down	AET04492.2(cationic amino acid transporter [Medicago truncatula])	GO:0016021(cellular_component:integral component of membrane); GO:0005313(molecular_function:L-glutamate transmembrane transporter activity); GO:0006865(biological_process:amino acid transport); GO:0022857(molecular_function:transmembrane transporter activity); GO:0015189(molecular_function:L-lysine transmembrane transporter activity); GO:0005886(cellular_component:plasma membrane); GO:0015171(mo…	K03294	TC.APA		COG0531(E:Amino acid transport and metabolism)	COG0531(amino acid)	PF13906.9(AA_permease_C:C-terminus of AA_permease)	sp|Q84MA5|CAAT1_ARATH(Cationic amino acid transporter 1 OS=Arabidopsis thaliana OX=3702 GN=CAT1 PE=1 SV=1)
MsG0080048303.01	MsG0080048303.01		1011	1	0	1	1	no test	no test	1	0	1	1	no test	no test	1	0	1	1	no test	no test	XP_045810941.1(F-box/LRR-repeat protein 2-like [Trifolium pratense])	GO:0031146(biological_process:SCF-dependent proteasomal ubiquitin-dependent protein catabolic process); GO:0019005(cellular_component:SCF ubiquitin ligase complex)	K10268	FBXL2_20		ENOG410XQ54(S:Function unknown)	ENOG410XQ54(F-box and leucine-rich repeat protein)	PF12799.10(LRR_4:Leucine Rich repeats (2 copies))	sp|Q9UKA2|FBXL4_HUMAN(F-box/LRR-repeat protein 4 OS=Homo sapiens OX=9606 GN=FBXL4 PE=1 SV=2)
MsG0080048304.01	MsG0080048304.01		1197	1	0	1	1	no test	no test	1.48247	0.567999	0.889293	1	no	up	1.34376	0.426279	0.916798	1	no	up	GAU35696.1(hypothetical protein TSUD_258710 [Trifolium subterraneum])	GO:0005737(cellular_component:cytoplasm)	K10268	FBXL2_20		ENOG410XQ54(S:Function unknown)	ENOG410XQ54(F-box and leucine-rich repeat protein)
MsG0080048305.01	MsG0080048305.01		420	1.63257	0.707141	0.754917	1	no	up	1.87734	0.908691	0.682337	1	no	up	1.14295	0.192767	0.925121	1	no	up	XP_003603086.1(low-temperature-induced cysteine proteinase [Medicago truncatula])	GO:0010494(cellular_component:cytoplasmic stress granule); GO:0051603(biological_process:proteolysis involved in cellular protein catabolic process); GO:0005615(cellular_component:extracellular space); GO:0050832(biological_process:defense response to fungus); GO:0005634(cellular_component:nucleus); GO:0000932(cellular_component:cytoplasmic mRNA processing body); GO:0005764(cellular_component:lys…	K25900	RD21		COG4870(O:Posttranslational modification, protein turnover, chaperones); ENOG410XR6S(S:Function unknown)	COG4870(cathepsin); ENOG410XR6S(Granulin)	PF00112.26(Peptidase_C1:Papain family cysteine protease)	sp|P43297|RD21A_ARATH(Cysteine proteinase RD21A OS=Arabidopsis thaliana OX=3702 GN=RD21A PE=1 SV=1)
MsG0080048306.01	MsG0080048306.01		721	2.14091	1.09822	0.787821	1	no	up	1.48247	0.567999	0.889293	1	no	up	0.689922	-0.535494	0.895591	1	no	down	XP_003593250.1(peptidyl-prolyl cis-trans isomerase FKBP12 [Medicago truncatula])	GO:0005737(cellular_component:cytoplasm); GO:0000413(biological_process:protein peptidyl-prolyl isomerization); GO:0061077(biological_process:chaperone-mediated protein folding); GO:0003755(molecular_function:peptidyl-prolyl cis-trans isomerase activity)	K01802	E5.2.1.8		COG0545(O:Posttranslational modification, protein turnover, chaperones)	COG0545(Peptidyl-prolyl cis-trans isomerase)	PF00254.31(FKBP_C:FKBP-type peptidyl-prolyl cis-trans isomerase)	sp|Q8LGG0|FKB12_ARATH(Peptidyl-prolyl cis-trans isomerase FKBP12 OS=Arabidopsis thaliana OX=3702 GN=FKBP12 PE=1 SV=2)
MsG0080048307.01	MsG0080048307.01		2319	0.736308	-0.44162	0.494744	0.767772	no	down	2.471	1.30509	0.0155026	0.0905081	no	up	3.3471	1.74291	0.00100955	0.121529	no	up	XP_003593245.1(root phototropism protein 3 [Medicago truncatula])	GO:0016567(biological_process:protein ubiquitination)				ENOG41110QX(S:Function unknown)	ENOG41110QX(cellular response to blue light)	PF03000.17(NPH3:NPH3 family)	sp|Q9FMF5|RPT3_ARATH(Root phototropism protein 3 OS=Arabidopsis thaliana OX=3702 GN=RPT3 PE=1 SV=2)
MsG0080048308.01	MsG0080048308.01		2694	1.56845	0.649342	0.172226	0.45791	no	up	1.62639	0.701669	0.120843	0.362314	no	up	1.03639	0.0515686	0.900772	0.999405	no	up	XP_003593244.2(pyruvate decarboxylase 1 [Medicago truncatula])	GO:0030976(molecular_function:thiamine pyrophosphate binding); GO:0005829(cellular_component:cytosol); GO:0000287(molecular_function:magnesium ion binding); GO:0016831(molecular_function:carboxy-lyase activity); GO:0004737(molecular_function:pyruvate decarboxylase activity); GO:0003824(molecular_function:catalytic activity)	K01568	PDC, pdc	map00010(Glycolysis / Gluconeogenesis)	COG3961(G:Carbohydrate transport and metabolism); COG3961(H:Coenzyme transport and metabolism)	COG3961(Pyruvate decarboxylase); COG3961(Pyruvate decarboxylase)	PF02776.21(TPP_enzyme_N:Thiamine pyrophosphate enzyme, N-terminal TPP binding domain); PF03981.15(Ubiq_cyt_C_chap:Ubiquinol-cytochrome C chaperone); PF00205.25(TPP_enzyme_M:Thiamine pyrophosphate enzyme, central domain); PF02775.24(TPP_enzyme_C:Thiamine pyrophosphate enzyme, C-terminal TPP binding domain)	sp|Q9M040|PDC4_ARATH(Pyruvate decarboxylase 4 OS=Arabidopsis thaliana OX=3702 GN=PDC4 PE=2 SV=1)
MsG0080048309.01	MsG0080048309.01		1092	0.586582	-0.769595	0.059252	0.245877	no	down	0.454915	-1.13633	0.00136555	0.0149557	yes	down	0.774561	-0.36855	0.314974	0.98279	no	down	XP_003593242.1(RING-H2 finger protein ATL54 [Medicago truncatula])	GO:0016567(biological_process:protein ubiquitination); GO:0016021(cellular_component:integral component of membrane)				ENOG41121N2(O:Posttranslational modification, protein turnover, chaperones)	ENOG41121N2(zinc ion binding)	PF13639.9(zf-RING_2:Ring finger domain); PF17123.8(zf-RING_11:RING-like zinc finger); PF12678.10(zf-rbx1:RING-H2 zinc finger domain); PF13923.9(zf-C3HC4_2:Zinc finger, C3HC4 type (RING finger)); PF00097.28(zf-C3HC4:Zinc finger, C3HC4 type (RING finger)); PF12861.10(zf-ANAPC11:Anaphase-promoting complex subunit 11 RING-H2 finger); PF13920.9(zf-C3HC4_3:Zinc finger, C3HC4 type (RING finger)); PF1463…	sp|Q8LFY8|ATL54_ARATH(RING-H2 finger protein ATL54 OS=Arabidopsis thaliana OX=3702 GN=ATL54 PE=2 SV=2)
MsG0080048310.01	MsG0080048310.01		222	2.14091	1.09822	0.787821	1	no	up	1.48247	0.567999	0.889293	1	no	up	0.689922	-0.535494	0.895591	1	no	down
MsG0080048311.01	MsG0080048311.01		318	14.796	3.88714	0.218441	1	no	up	10.8511	3.43977	0.299071	1	no	up	0.724748	-0.464448	0.817607	1	no	down	KEH36453.1(transmembrane protein, putative [Medicago truncatula])	GO:0016021(cellular_component:integral component of membrane); GO:0005886(cellular_component:plasma membrane); GO:0031225(cellular_component:anchored component of membrane)						PF02950.20(Conotoxin:Conotoxin)
MsG0080048312.01	MsG0080048312.01		2457	0.167923	-2.57413	0.000125799	0.00314321	yes	down	0.142325	-2.81274	1.88874e-05	0.000499055	yes	down	0.845696	-0.24179	0.53711	0.999405	no	down	XP_003593237.1(bifunctional riboflavin biosynthesis protein RIBA 1, chloroplastic [Medicago truncatula])	GO:0008686(molecular_function:3,4-dihydroxy-2-butanone-4-phosphate synthase activity); GO:0003935(molecular_function:GTP cyclohydrolase II activity); GO:0005525(molecular_function:GTP binding); GO:0009231(biological_process:riboflavin biosynthetic process); GO:0046872(molecular_function:metal ion binding); GO:0009507(cellular_component:chloroplast)	K14652	ribBA	map00740(Riboflavin metabolism); map00790(Folate biosynthesis); map01240(Biosynthesis of cofactors)	COG0807(H:Coenzyme transport and metabolism)	COG0807(Catalyzes the conversion of D-ribulose 5-phosphate to formate and 3,4-dihydroxy-2-butanone 4-phosphate (By similarity))	PF00926.22(DHBP_synthase:3,4-dihydroxy-2-butanone 4-phosphate synthase); PF00925.23(GTP_cyclohydro2:GTP cyclohydrolase II)	sp|P47924|RIBA1_ARATH(Bifunctional riboflavin biosynthesis protein RIBA 1, chloroplastic OS=Arabidopsis thaliana OX=3702 GN=RIBA1 PE=1 SV=2)
MsG0080048313.01	MsG0080048313.01		708	3.32663	1.73406	0.00170783	0.0220026	yes	up	3.09535	1.6301	0.0029654	0.0268401	yes	up	0.925285	-0.112031	0.815003	0.999405	no	down	XP_003593234.1(dicarboxylate transporter 2.1, chloroplastic [Medicago truncatula])	GO:0005215(molecular_function:transporter activity); GO:0016021(cellular_component:integral component of membrane); GO:0016020(cellular_component:membrane); GO:0009706(cellular_component:chloroplast inner membrane); GO:0006814(biological_process:sodium ion transport); GO:0015140(molecular_function:malate transmembrane transporter activity); GO:0055085(biological_process:transmembrane transport)				COG0471(P:Inorganic ion transport and metabolism)	COG0471(Transporter)	PF00939.22(Na_sulph_symp:Sodium:sulfate symporter transmembrane region)	sp|Q8L7Z9|DIT2_SPIOL(Dicarboxylate transporter 2, chloroplastic OS=Spinacia oleracea OX=3562 GN=DIT2 PE=1 SV=1)
MsG0080048314.01	MsG0080048314.01		2031	1.1793	0.237934	0.632259	0.848661	no	up	1.5135	0.597886	0.215438	0.507513	no	up	1.27832	0.354249	0.424218	0.999405	no	up	XP_013449346.1(AT-rich interactive domain-containing protein 2 [Medicago truncatula])	GO:0005634(cellular_component:nucleus); GO:0003677(molecular_function:DNA binding)				ENOG410YIMV(K:Transcription)	ENOG410YIMV(Domain-Containing protein)	PF01388.24(ARID:ARID/BRIGHT DNA binding domain); PF00249.34(Myb_DNA-binding:Myb-like DNA-binding domain)	sp|Q84JT7|ARID1_ARATH(AT-rich interactive domain-containing protein 1 OS=Arabidopsis thaliana OX=3702 GN=ARID1 PE=2 SV=1)
MsG0080048315.01	MsG0080048315.01		1026	0.242587	-2.04343	0.000612418	0.0103963	yes	down	0.232282	-2.10605	0.00637358	0.0477948	yes	down	0.957117	-0.0632326	0.944596	0.999405	no	down	XP_024638827.1(vascular-related unknown protein 1 [Medicago truncatula])	GO:0010089(biological_process:xylem development); GO:0008270(molecular_function:zinc ion binding); GO:0003676(molecular_function:nucleic acid binding)				ENOG410ZE7Q(S:Function unknown)	ENOG410ZE7Q(-)		sp|Q9LSZ3|VUP1_ARATH(Vascular-related unknown protein 1 OS=Arabidopsis thaliana OX=3702 GN=VUP1 PE=2 SV=1)
MsG0080048316.01	MsG0080048316.01		303	0.701105	-0.512298	0.0428316	0.202965	no	down	0.92274	-0.116004	0.731284	0.90408	no	down	1.30965	0.389183	0.201051	0.948191	no	up	XP_013455640.1(RING-box protein 1a [Medicago truncatula])	GO:0097602(molecular_function:cullin family protein binding); GO:0005634(cellular_component:nucleus); GO:0016567(biological_process:protein ubiquitination); GO:0006511(biological_process:ubiquitin-dependent protein catabolic process); GO:0008270(molecular_function:zinc ion binding); GO:0031461(cellular_component:cullin-RING ubiquitin ligase complex); GO:0061630(molecular_function:ubiquitin protei…	K03868	RBX1, ROC1	map04120(Ubiquitin mediated proteolysis); map03420(Nucleotide excision repair); map04141(Protein processing in endoplasmic reticulum)	COG5194(O:Posttranslational modification, protein turnover, chaperones)	COG5194(protein ubiquitination)	PF12678.10(zf-rbx1:RING-H2 zinc finger domain); PF12861.10(zf-ANAPC11:Anaphase-promoting complex subunit 11 RING-H2 finger)	sp|Q940X7|RBX1A_ARATH(RING-box protein 1a OS=Arabidopsis thaliana OX=3702 GN=RBX1A PE=1 SV=1)
MsG0080048317.01	MsG0080048317.01		1224	2.82212	1.49678	0.0449034	0.209474	no	up	1.24705	0.31852	0.754521	0.913433	no	up	0.441384	-1.17989	0.217143	0.955783	no	down	XP_045802555.1(uncharacterized protein LOC123896176 [Trifolium pratense])
MsG0080048318.01	MsG0080048318.01		210	1	0	1	1	no test	no test	1	0	1	1	no test	no test	1	0	1	1	no test	no test	XP_045809753.1(ATP-dependent DNA helicase PIF1-like [Trifolium pratense])	GO:0006310(biological_process:DNA recombination); GO:0000723(biological_process:telomere maintenance); GO:0006281(biological_process:DNA repair); GO:0004386(molecular_function:helicase activity); GO:0016887(molecular_function:ATPase activity); GO:0003678(molecular_function:DNA helicase activity); GO:0005524(molecular_function:ATP binding)						PF02689.17(Herpes_Helicase:Helicase); PF13538.9(UvrD_C_2:UvrD-like helicase C-terminal domain)	sp|Q0P9V4|PIF1_CAMJE(ATP-dependent DNA helicase pif1 OS=Campylobacter jejuni subsp. jejuni serotype O:2 (strain ATCC 700819 / NCTC 11168) OX=192222 GN=pif1 PE=3 SV=1)
MsG0080048319.01	MsG0080048319.01		1642	1.3611	0.444772	0.649644	0.857929	no	up	1.38408	0.468931	0.587818	0.83033	no	up	1.00808	0.0116136	0.986625	0.999405	no	up	XP_003605900.1(homeobox-leucine zipper protein HDG2 [Medicago truncatula])	GO:0005634(cellular_component:nucleus); GO:0008289(molecular_function:lipid binding); GO:0000981(molecular_function:RNA polymerase II transcription factor activity, sequence-specific DNA binding); GO:0003677(molecular_function:DNA binding)	K09338	HD-ZIP		ENOG411107H(K:Transcription)	ENOG411107H(Homeobox-leucine zipper protein)	PF01852.22(START:START domain)	sp|Q93V99|PDF2_ARATH(Homeobox-leucine zipper protein PROTODERMAL FACTOR 2 OS=Arabidopsis thaliana OX=3702 GN=PDF2 PE=1 SV=1)
MsG0080048320.01	MsG0080048320.01		309	0.79833	-0.324943	0.932602	1	no	down	0.883787	-0.17823	0.953669	1	no	down	1.10317	0.14165	0.964517	1	no	up	RID40284.1(hypothetical protein BRARA_J00342 [Brassica rapa])	GO:0005634(cellular_component:nucleus); GO:0008289(molecular_function:lipid binding); GO:0000981(molecular_function:RNA polymerase II transcription factor activity, sequence-specific DNA binding); GO:0003677(molecular_function:DNA binding)	K09338	HD-ZIP		ENOG411107H(K:Transcription)	ENOG411107H(Homeobox-leucine zipper protein)		sp|Q94C37|HDG2_ARATH(Homeobox-leucine zipper protein HDG2 OS=Arabidopsis thaliana OX=3702 GN=HDG2 PE=1 SV=1)
MsG0080048321.01	MsG0080048321.01		869	1	0	1	1	no test	no test	1	0	1	1	no test	no test	1	0	1	1	no test	no test	XP_003605890.1(senescence-specific cysteine protease SAG39 [Medicago truncatula])	GO:0051603(biological_process:proteolysis involved in cellular protein catabolic process); GO:0005615(cellular_component:extracellular space); GO:0016021(cellular_component:integral component of membrane); GO:0005764(cellular_component:lysosome); GO:0004197(molecular_function:cysteine-type endopeptidase activity); GO:0006508(biological_process:proteolysis); GO:0008234(molecular_function:cysteine-…	K16292	CEP, CYSEP		COG4870(O:Posttranslational modification, protein turnover, chaperones)	COG4870(cathepsin)	PF00112.26(Peptidase_C1:Papain family cysteine protease); PF08246.15(Inhibitor_I29:Cathepsin propeptide inhibitor domain (I29))	sp|A2XQE8|SAG39_ORYSI(Senescence-specific cysteine protease SAG39 OS=Oryza sativa subsp. indica OX=39946 GN=OsI_14861 PE=3 SV=1)
MsG0080048322.01	MsG0080048322.01		1811	0.909257	-0.13724	0.789987	0.923325	no	down	1.282	0.358392	0.454669	0.741494	no	up	1.40323	0.488752	0.313378	0.98279	no	up	RHN74107.1(putative transcription factor interactor and regulator CCHC(Zn) family [Medicago truncatula])	GO:0016787(molecular_function:hydrolase activity); GO:0016779(molecular_function:nucleotidyltransferase activity); GO:0004523(molecular_function:RNA-DNA hybrid ribonuclease activity); GO:0015074(biological_process:DNA integration); GO:0004190(molecular_function:aspartic-type endopeptidase activity); GO:0008270(molecular_function:zinc ion binding); GO:0003676(molecular_function:nucleic acid bindin…				ENOG411240R(S:Function unknown)	ENOG411240R(Protein of unknown function (DUF2781))	PF05241.15(EBP:EXPERA (EXPanded EBP superfamily)); PF00098.26(zf-CCHC:Zinc knuckle); PF03732.20(Retrotrans_gag:Retrotransposon gag protein)	sp|Q6DFQ5|SGMR2_XENTR(Sigma intracellular receptor 2 OS=Xenopus tropicalis OX=8364 GN=tmem97 PE=2 SV=1)
MsG0080048323.01	MsG0080048323.01		1026	5.9918	2.58299	0.451188	1	no	up	15.1769	3.92381	0.101386	1	no	up	2.52533	1.33647	0.41055	1	no	up	GAU31920.1(hypothetical protein TSUD_271050 [Trifolium subterraneum])	GO:0090404(cellular_component:pollen tube tip); GO:0003924(molecular_function:GTPase activity); GO:0005525(molecular_function:GTP binding)	K07976	RAB		COG1100(S:Function unknown)	COG1100(GTP-binding Protein)	PF00071.25(Ras:Ras family); PF08477.16(Roc:Ras of Complex, Roc, domain of DAPkinase)	sp|P87027|SPG1_SCHPO(Septum-promoting GTP-binding protein 1 OS=Schizosaccharomyces pombe (strain 972 / ATCC 24843) OX=284812 GN=spg1 PE=1 SV=1)
MsG0080048324.01	MsG0080048324.01		591	0.692473	-0.530171	0.839744	1	no	down	1.1945	0.256407	0.900915	1	no	up	1.70125	0.766594	0.728967	1	no	up	ABD33091.1(Peptidase aspartic, active site, partial [Medicago truncatula])	GO:0006310(biological_process:DNA recombination); GO:0005634(cellular_component:nucleus); GO:0004523(molecular_function:RNA-DNA hybrid ribonuclease activity); GO:0003887(molecular_function:DNA-directed DNA polymerase activity); GO:0015074(biological_process:DNA integration); GO:0004190(molecular_function:aspartic-type endopeptidase activity); GO:0003723(molecular_function:RNA binding); GO:0003964…
MsG0080048325.01	MsG0080048325.01		558	2.14091	1.09822	0.787821	1	no	up	1	0	1	1	no test	no test	0.354222	-1.49727	0.713666	1	no	down	RHN73014.1(hypothetical protein MtrunA17_Chr2g0293921 [Medicago truncatula])	GO:0006310(biological_process:DNA recombination); GO:0005634(cellular_component:nucleus); GO:0004523(molecular_function:RNA-DNA hybrid ribonuclease activity); GO:0003887(molecular_function:DNA-directed DNA polymerase activity); GO:0015074(biological_process:DNA integration); GO:0004190(molecular_function:aspartic-type endopeptidase activity); GO:0003723(molecular_function:RNA binding); GO:0003964…
MsG0080048326.01	MsG0080048326.01		1341	1	0	1	1	no test	no test	1	0	1	1	no test	no test	1	0	1	1	no test	no test	KEH30235.1(hypothetical protein MTR_4g465410 [Medicago truncatula])
MsG0080048327.01	MsG0080048327.01		210	1	0	1	1	no test	no test	1	0	1	1	no test	no test	1	0	1	1	no test	no test	XP_024634759.1(uncharacterized protein LOC112420242 [Medicago truncatula])	GO:0016740(molecular_function:transferase activity); GO:0016021(cellular_component:integral component of membrane); GO:0004523(molecular_function:RNA-DNA hybrid ribonuclease activity); GO:0003676(molecular_function:nucleic acid binding)
MsG0080048328.01	MsG0080048328.01		543	1	0	1	1	no test	no test	1	0	1	1	no test	no test	1	0	1	1	no test	no test	KEH15434.1(hypothetical protein MTR_1056s0010 [Medicago truncatula])	GO:0016787(molecular_function:hydrolase activity); GO:0016779(molecular_function:nucleotidyltransferase activity); GO:0004523(molecular_function:RNA-DNA hybrid ribonuclease activity); GO:0015074(biological_process:DNA integration); GO:0008270(molecular_function:zinc ion binding); GO:0003676(molecular_function:nucleic acid binding); GO:0003964(molecular_function:RNA-directed DNA polymerase activit…						PF00098.26(zf-CCHC:Zinc knuckle)
MsG0080048329.01	MsG0080048329.01		2493	2.25525	1.17329	0.0949082	0.325966	no	up	2.20053	1.13785	0.111236	0.345048	no	up	0.974213	-0.0376903	0.934466	0.999405	no	down	AES88298.2(aspartyl/asparaginyl-tRNA synthetase family protein [Medicago truncatula])	GO:0005737(cellular_component:cytoplasm); GO:0004812(molecular_function:aminoacyl-tRNA ligase activity); GO:0004815(molecular_function:aspartate-tRNA ligase activity); GO:0003677(molecular_function:DNA binding); GO:0005739(cellular_component:mitochondrion); GO:0000166(molecular_function:nucleotide binding); GO:0003676(molecular_function:nucleic acid binding); GO:0006418(biological_process:tRNA am…	K01876	DARS2, aspS	map00970(Aminoacyl-tRNA biosynthesis)	COG0173(J:Translation, ribosomal structure and biogenesis)	COG0173(aspartyl-trna synthetase)	PF00152.23(tRNA-synt_2:tRNA synthetases class II (D, K and N)); PF04844.16(Ovate:Transcriptional repressor, ovate); PF02938.17(GAD:GAD domain); PF01336.28(tRNA_anti-codon:OB-fold nucleic acid binding domain)	sp|F4JJT9|SYDM_ARATH(Aspartate--tRNA ligase, chloroplastic/mitochondrial OS=Arabidopsis thaliana OX=3702 GN=At4g33760 PE=2 SV=1)
MsG0080048330.01	MsG0080048330.01		2130	0.895406	-0.159387	0.929074	1	no	down	0.895345	-0.159485	0.888756	1	no	down	0.999598	-0.000579769	0.999738	1	no	down	XP_045789330.1(uncharacterized protein LOC123884300 [Trifolium pratense])	GO:0000723(biological_process:telomere maintenance); GO:0006310(biological_process:DNA recombination); GO:0006281(biological_process:DNA repair); GO:0016787(molecular_function:hydrolase activity); GO:0016887(molecular_function:ATPase activity); GO:0003678(molecular_function:DNA helicase activity); GO:0005524(molecular_function:ATP binding)	K15255	PIF1				PF05970.17(PIF1:PIF1-like helicase); PF13604.9(AAA_30:AAA domain); PF04851.18(ResIII:Type III restriction enzyme, res subunit)	sp|Q7ZV90|PIF1_DANRE(ATP-dependent DNA helicase PIF1 OS=Danio rerio OX=7955 GN=pif1 PE=2 SV=1)
MsG0080048331.01	MsG0080048331.01		707	5.17795	2.37238	0.119899	1	no	up	4.81422	2.2673	0.211641	1	no	up	0.920265	-0.119879	0.929148	0.999405	no	down	XP_003616167.1(putative disease resistance protein RGA1 [Medicago truncatula])	GO:0006952(biological_process:defense response); GO:0016787(molecular_function:hydrolase activity); GO:0051707(biological_process:response to other organism); GO:0043531(molecular_function:ADP binding)				COG4886(S:Function unknown)	COG4886(leucine Rich Repeat)
MsG0080048332.01	MsG0080048332.01		1596	1.13103	0.177634	0.562278	0.807899	no	up	1.3462	0.428891	0.162199	0.431328	no	up	1.1869	0.247199	0.391577	0.998586	no	up	XP_003616167.1(putative disease resistance protein RGA1 [Medicago truncatula])	GO:0006952(biological_process:defense response); GO:0016787(molecular_function:hydrolase activity); GO:0051707(biological_process:response to other organism); GO:0043531(molecular_function:ADP binding)				COG4886(S:Function unknown)	COG4886(leucine Rich Repeat)	PF00931.25(NB-ARC:NB-ARC domain); PF18052.4(Rx_N:Rx N-terminal domain); PF13855.9(LRR_8:Leucine rich repeat); PF12799.10(LRR_4:Leucine Rich repeats (2 copies)); PF13173.9(AAA_14:AAA domain)	sp|Q7XA42|RGA1_SOLBU(Putative disease resistance protein RGA1 OS=Solanum bulbocastanum OX=147425 GN=RGA1 PE=2 SV=2)
MsG0080048333.01	MsG0080048333.01		585	0.988023	-0.0173837	0.975611	0.993432	no	down	1.541	0.623869	0.284993	0.589677	no	up	1.55565	0.637517	0.270493	0.976444	no	up	XP_024636833.1(uncharacterized protein LOC25492260 [Medicago truncatula])	GO:0016021(cellular_component:integral component of membrane)				ENOG4111RJP(S:Function unknown)	ENOG4111RJP(-)
MsG0080048334.01	MsG0080048334.01		594	1	0	1	1	no test	no test	1.48247	0.567999	0.889293	1	no	up	1.34376	0.426279	0.916798	1	no	up	XP_013457748.1(protein NBR1 homolog [Medicago truncatula])	GO:0016021(cellular_component:integral component of membrane); GO:0008270(molecular_function:zinc ion binding); GO:0005515(molecular_function:protein binding); GO:0005776(cellular_component:autophagosome)				ENOG411245W(S:Function unknown)	ENOG411245W(ubiquitin-associated (UBA) TS-N domain-containing protein octicosapeptide Phox Bemp1 (PB1) domain-containing protein)	PF00564.27(PB1:PB1 domain)	sp|Q9SB64|NBR1_ARATH(Protein NBR1 homolog OS=Arabidopsis thaliana OX=3702 GN=NBR1 PE=1 SV=1)
MsG0080048335.01	MsG0080048335.01		276	1	0	1	1	no test	no test	1	0	1	1	no test	no test	1	0	1	1	no test	no test	ABN06136.1(RNA-directed DNA polymerase (Reverse transcriptase); Ribonuclease H [Medicago truncatula])	GO:0006310(biological_process:DNA recombination); GO:0005634(cellular_component:nucleus); GO:0004523(molecular_function:RNA-DNA hybrid ribonuclease activity); GO:0003887(molecular_function:DNA-directed DNA polymerase activity); GO:0015074(biological_process:DNA integration); GO:0030430(cellular_component:host cell cytoplasm); GO:0003723(molecular_function:RNA binding); GO:0003676(molecular_functi…
MsG0080048336.01	MsG0080048336.01		354	1.46468	0.550589	0.853813	1	no	up	4.55502	2.18746	0.355261	1	no	up	3.06231	1.61462	0.422512	1	no	up	XP_003608030.1(uncharacterized protein LOC11441427 [Medicago truncatula])	GO:0016021(cellular_component:integral component of membrane); GO:0009055(molecular_function:electron carrier activity)				ENOG410YPAM(S:Function unknown)	ENOG410YPAM(Plastocyanin-like domain)
MsG0080048337.01	MsG0080048337.01		447	1	0	1	1	no test	no test	1	0	1	1	no test	no test	1	0	1	1	no test	no test	AES76214.2(DUF223 domain protein [Medicago truncatula])	GO:0006310(biological_process:DNA recombination); GO:0051321(biological_process:meiotic cell cycle); GO:0006281(biological_process:DNA repair); GO:0043047(molecular_function:single-stranded telomeric DNA binding); GO:0005634(cellular_component:nucleus); GO:0000724(biological_process:double-strand break repair via homologous recombination); GO:0003684(molecular_function:damaged DNA binding); GO:00…						PF02721.17(DUF223:Domain of unknown function DUF223)
MsG0080048338.01	MsG0080048338.01		735	3.13649	1.64915	0.497446	1	no	up	0.142344	-2.81255	0.481631	1	no	down	0.0451106	-4.47039	0.117374	1	no	down	RHN77304.1(putative RNA-directed DNA polymerase [Medicago truncatula])	GO:0003964(molecular_function:RNA-directed DNA polymerase activity); GO:0015074(biological_process:DNA integration); GO:0008270(molecular_function:zinc ion binding); GO:0003676(molecular_function:nucleic acid binding); GO:0003899(molecular_function:DNA-directed RNA polymerase activity)				COG2801(L:Replication, recombination and repair)	COG2801(Retrotransposon protein)		sp|Q94HW2|POLR1_ARATH(Retrovirus-related Pol polyprotein from transposon RE1 OS=Arabidopsis thaliana OX=3702 GN=RE1 PE=2 SV=1)
MsG0080048339.01	MsG0080048339.01		654	0.088048	-3.50557	0.292996	1	no	down	0.0610886	-4.03295	0.211202	1	no	down	1	0	1	1	no	no change	RHN77304.1(putative RNA-directed DNA polymerase [Medicago truncatula])	GO:0003964(molecular_function:RNA-directed DNA polymerase activity); GO:0015074(biological_process:DNA integration); GO:0008270(molecular_function:zinc ion binding); GO:0003676(molecular_function:nucleic acid binding); GO:0003899(molecular_function:DNA-directed RNA polymerase activity)				COG2801(L:Replication, recombination and repair)	COG2801(Retrotransposon protein)		sp|P04146|COPIA_DROME(Copia protein OS=Drosophila melanogaster OX=7227 GN=GIP PE=1 SV=3)
MsG0080048340.01	MsG0080048340.01		486	1	0	1	1	no test	no test	1	0	1	1	no test	no test	1	0	1	1	no test	no test	XP_013460232.2(FBD-associated F-box protein At5g18780 [Medicago truncatula])	GO:0016021(cellular_component:integral component of membrane); GO:0005515(molecular_function:protein binding)						PF00646.36(F-box:F-box domain); PF12937.10(F-box-like:F-box-like)	sp|Q56YH2|FBD41_ARATH(FBD-associated F-box protein At5g18780 OS=Arabidopsis thaliana OX=3702 GN=At5g18780 PE=2 SV=2)
MsG0080048341.01	MsG0080048341.01		1032	8.86787	3.14859	0.427294	1	no	up	1	0	1	1	no test	no test	0.0855355	-3.54733	0.371129	1	no	down	XP_024629693.1(cytochrome P450 714C2-like [Medicago truncatula])	GO:0016020(cellular_component:membrane); GO:0004497(molecular_function:monooxygenase activity); GO:0070330(molecular_function:aromatase activity); GO:0020037(molecular_function:heme binding); GO:0016021(cellular_component:integral component of membrane); GO:0016705(molecular_function:oxidoreductase activity, acting on paired donors, with incorporation or reduction of molecular oxygen); GO:0005506…				COG2124(Q:Secondary metabolites biosynthesis, transport and catabolism)	COG2124(Cytochrome p450)	PF00067.25(p450:Cytochrome P450)	sp|Q93Z79|C14A1_ARATH(Cytochrome P450 714A1 OS=Arabidopsis thaliana OX=3702 GN=CYP714A1 PE=2 SV=1)
MsG0080048342.01	MsG0080048342.01		486	1	0	1	1	no test	no test	1	0	1	1	no test	no test	1	0	1	1	no test	no test	RHN71289.1(putative reverse transcriptase zinc-binding domain-containing protein [Medicago truncatula])	GO:0003964(molecular_function:RNA-directed DNA polymerase activity); GO:0016021(cellular_component:integral component of membrane); GO:0016740(molecular_function:transferase activity); GO:0004523(molecular_function:RNA-DNA hybrid ribonuclease activity); GO:0003676(molecular_function:nucleic acid binding)
MsG0080048343.01	MsG0080048343.01		1200	0.292331	-1.77432	0.361357	1	no	down	0.93777	-0.0926947	0.951175	0.986371	no	down	3.18432	1.67099	0.249796	1	no	up	XP_024629693.1(cytochrome P450 714C2-like [Medicago truncatula])	GO:0016020(cellular_component:membrane); GO:0004497(molecular_function:monooxygenase activity); GO:0070330(molecular_function:aromatase activity); GO:0020037(molecular_function:heme binding); GO:0016021(cellular_component:integral component of membrane); GO:0016705(molecular_function:oxidoreductase activity, acting on paired donors, with incorporation or reduction of molecular oxygen); GO:0005506…				COG2124(Q:Secondary metabolites biosynthesis, transport and catabolism)	COG2124(Cytochrome p450)	PF00067.25(p450:Cytochrome P450)	sp|Q93Z79|C14A1_ARATH(Cytochrome P450 714A1 OS=Arabidopsis thaliana OX=3702 GN=CYP714A1 PE=2 SV=1)
MsG0080048344.01	MsG0080048344.01		1266	0.706222	-0.501806	0.172659	0.458657	no	down	0.676439	-0.563968	0.0908018	0.301566	no	down	0.953206	-0.0691408	0.819552	0.999405	no	down	XP_003592044.1(chalcone synthase 4 [Medicago truncatula])	GO:0030639(biological_process:polyketide biosynthetic process); GO:0009715(biological_process:chalcone biosynthetic process); GO:0000786(cellular_component:nucleosome); GO:0016210(molecular_function:naringenin-chalcone synthase activity); GO:0009813(biological_process:flavonoid biosynthetic process); GO:0102128(molecular_function:chalcone synthase activity); GO:0003824(molecular_function:catalyti…	K00660	CHS	map04712(Circadian rhythm - plant); map00960(Tropane, piperidine and pyridine alkaloid biosynthesis); map00941(Flavonoid biosynthesis)	COG3424(Q:Secondary metabolites biosynthesis, transport and catabolism)	COG3424(synthase)	PF00195.22(Chal_sti_synt_N:Chalcone and stilbene synthases, N-terminal domain); PF02797.18(Chal_sti_synt_C:Chalcone and stilbene synthases, C-terminal domain); PF00125.27(Histone:Core histone H2A/H2B/H3/H4); PF08545.13(ACP_syn_III:3-Oxoacyl-[acyl-carrier-protein (ACP)] synthase III); PF08392.15(FAE1_CUT1_RppA:FAE1/Type III polyketide synthase-like protein); PF08541.13(ACP_syn_III_C:3-Oxoacyl-[acy…	sp|P51078|CHS5_MEDSA(Chalcone synthase 4-2 OS=Medicago sativa OX=3879 GN=CHS4-2 PE=2 SV=1)
MsG0080048345.01	MsG0080048345.01		1116	0.076915	-3.70059	1.75501e-08	2.11031e-06	yes	down	0.0421851	-4.56712	3.11841e-13	1.18545e-10	yes	down	0.546563	-0.87154	0.0431473	0.693364	no	down	P30076.1(RecName: Full=Chalcone synthase 8; AltName: Full=Naringenin-chalcone synthase 8 [Medicago sativa])	GO:0030639(biological_process:polyketide biosynthetic process); GO:0009715(biological_process:chalcone biosynthetic process); GO:0016210(molecular_function:naringenin-chalcone synthase activity); GO:0009813(biological_process:flavonoid biosynthetic process); GO:0102128(molecular_function:chalcone synthase activity); GO:0003824(molecular_function:catalytic activity); GO:0009058(biological_process:…	K00660	CHS	map04712(Circadian rhythm - plant); map00960(Tropane, piperidine and pyridine alkaloid biosynthesis); map00941(Flavonoid biosynthesis)	COG3424(Q:Secondary metabolites biosynthesis, transport and catabolism)	COG3424(synthase)	PF00195.22(Chal_sti_synt_N:Chalcone and stilbene synthases, N-terminal domain); PF02797.18(Chal_sti_synt_C:Chalcone and stilbene synthases, C-terminal domain); PF08545.13(ACP_syn_III:3-Oxoacyl-[acyl-carrier-protein (ACP)] synthase III)	sp|P30076|CHS8_MEDSA(Chalcone synthase 8 OS=Medicago sativa OX=3879 GN=CHS8 PE=2 SV=1)
MsG0080048346.01	MsG0080048346.01		492	0.131474	-2.92715	7.34605e-05	0.00208001	yes	down	0.0590134	-4.08281	4.29702e-11	6.98458e-09	yes	down	0.44688	-1.16204	0.052354	0.722035	no	down	XP_003592020.2(S-adenosylmethionine carrier 1, chloroplastic/mitochondrial [Medicago truncatula])	GO:0000095(molecular_function:S-adenosyl-L-methionine transmembrane transporter activity); GO:0005743(cellular_component:mitochondrial inner membrane); GO:0016021(cellular_component:integral component of membrane); GO:0055085(biological_process:transmembrane transport)	K15111	SLC25A26		ENOG4110BII(S:Function unknown)	ENOG4110BII(mitochondrial carrier protein)	PF00153.30(Mito_carr:Mitochondrial carrier protein)	sp|Q94AG6|SAMC1_ARATH(S-adenosylmethionine carrier 1, chloroplastic/mitochondrial OS=Arabidopsis thaliana OX=3702 GN=SAMC1 PE=1 SV=1)
MsG0080048347.01	MsG0080048347.01		1073	0.108278	-3.20719	1.1474e-05	0.000471351	yes	down	0.0582424	-4.10179	1.06376e-10	1.63868e-08	yes	down	0.536779	-0.897599	0.138409	0.907455	no	down	RHN81644.1(putative naringenin-chalcone synthase [Medicago truncatula])	GO:0030639(biological_process:polyketide biosynthetic process); GO:0009715(biological_process:chalcone biosynthetic process); GO:0016210(molecular_function:naringenin-chalcone synthase activity); GO:0009813(biological_process:flavonoid biosynthetic process); GO:0102128(molecular_function:chalcone synthase activity); GO:0003824(molecular_function:catalytic activity); GO:0016747(molecular_function:…	K00660	CHS	map04712(Circadian rhythm - plant); map00960(Tropane, piperidine and pyridine alkaloid biosynthesis); map00941(Flavonoid biosynthesis)	COG3424(Q:Secondary metabolites biosynthesis, transport and catabolism)	COG3424(synthase)	PF00195.22(Chal_sti_synt_N:Chalcone and stilbene synthases, N-terminal domain); PF02797.18(Chal_sti_synt_C:Chalcone and stilbene synthases, C-terminal domain); PF08541.13(ACP_syn_III_C:3-Oxoacyl-[acyl-carrier-protein (ACP)] synthase III C terminal); PF08545.13(ACP_syn_III:3-Oxoacyl-[acyl-carrier-protein (ACP)] synthase III)	sp|P30076|CHS8_MEDSA(Chalcone synthase 8 OS=Medicago sativa OX=3879 GN=CHS8 PE=2 SV=1)
MsG0080048348.01	MsG0080048348.01		924	0.111375	-3.16651	5.77213e-06	0.000271408	yes	down	0.0449475	-4.47561	5.73675e-10	7.30862e-08	yes	down	0.401529	-1.31643	0.034789	0.653398	no	down	XP_003592022.2(chalcone synthase 8 [Medicago truncatula])	GO:0030639(biological_process:polyketide biosynthetic process); GO:0009715(biological_process:chalcone biosynthetic process); GO:0016210(molecular_function:naringenin-chalcone synthase activity); GO:0009813(biological_process:flavonoid biosynthetic process); GO:0102128(molecular_function:chalcone synthase activity); GO:0003824(molecular_function:catalytic activity); GO:0009058(biological_process:…	K00660	CHS	map04712(Circadian rhythm - plant); map00960(Tropane, piperidine and pyridine alkaloid biosynthesis); map00941(Flavonoid biosynthesis)	COG3424(Q:Secondary metabolites biosynthesis, transport and catabolism)	COG3424(synthase)	PF00195.22(Chal_sti_synt_N:Chalcone and stilbene synthases, N-terminal domain); PF02797.18(Chal_sti_synt_C:Chalcone and stilbene synthases, C-terminal domain); PF08545.13(ACP_syn_III:3-Oxoacyl-[acyl-carrier-protein (ACP)] synthase III); PF08392.15(FAE1_CUT1_RppA:FAE1/Type III polyketide synthase-like protein); PF08541.13(ACP_syn_III_C:3-Oxoacyl-[acyl-carrier-protein (ACP)] synthase III C terminal)	sp|P51078|CHS5_MEDSA(Chalcone synthase 4-2 OS=Medicago sativa OX=3879 GN=CHS4-2 PE=2 SV=1)
MsG0080048349.01	MsG0080048349.01		201	0.0454104	-4.46083	0.0129503	1	no	down	0.0577119	-4.11499	0.0158025	0.0918693	no	down	1.25382	0.326335	0.935633	1	no	up	ATI97627.1(CHS, partial [Lotus sessilifolius])	GO:0030639(biological_process:polyketide biosynthetic process); GO:0016210(molecular_function:naringenin-chalcone synthase activity); GO:0009813(biological_process:flavonoid biosynthetic process); GO:0102128(molecular_function:chalcone synthase activity); GO:0003824(molecular_function:catalytic activity); GO:0016747(molecular_function:transferase activity, transferring acyl groups other than amin…				COG3424(Q:Secondary metabolites biosynthesis, transport and catabolism)	COG3424(synthase)	PF02797.18(Chal_sti_synt_C:Chalcone and stilbene synthases, C-terminal domain); PF08541.13(ACP_syn_III_C:3-Oxoacyl-[acyl-carrier-protein (ACP)] synthase III C terminal)	sp|P51080|CHS7_MEDSA(Chalcone synthase (Fragment) OS=Medicago sativa OX=3879 GN=CHSII PE=2 SV=1)
MsG0080048350.01	MsG0080048350.01		216	1	0	1	1	no test	no test	1	0	1	1	no test	no test	1	0	1	1	no test	no test	ACJ85106.1(unknown [Medicago truncatula])	GO:0030639(biological_process:polyketide biosynthetic process); GO:0016210(molecular_function:naringenin-chalcone synthase activity); GO:0009813(biological_process:flavonoid biosynthetic process); GO:0102128(molecular_function:chalcone synthase activity); GO:0003824(molecular_function:catalytic activity); GO:0016747(molecular_function:transferase activity, transferring acyl groups other than amin…	K00660	CHS	map04712(Circadian rhythm - plant); map00960(Tropane, piperidine and pyridine alkaloid biosynthesis); map00941(Flavonoid biosynthesis)			PF02797.18(Chal_sti_synt_C:Chalcone and stilbene synthases, C-terminal domain)	sp|P51080|CHS7_MEDSA(Chalcone synthase (Fragment) OS=Medicago sativa OX=3879 GN=CHSII PE=2 SV=1)
MsG0080048351.01	MsG0080048351.01		237	0.103297	-3.27513	0.407303	1	no	down	0.891345	-0.165945	0.946419	1	no	down	8.62037	3.10775	0.365548	1	no	up	ADP37944.1(chalcone synthase, partial [Fragaria chiloensis])	GO:0030639(biological_process:polyketide biosynthetic process); GO:0016210(molecular_function:naringenin-chalcone synthase activity); GO:0009813(biological_process:flavonoid biosynthetic process); GO:0102128(molecular_function:chalcone synthase activity); GO:0003824(molecular_function:catalytic activity); GO:0009058(biological_process:biosynthetic process); GO:0016747(molecular_function:transfera…	K00660	CHS	map04712(Circadian rhythm - plant); map00960(Tropane, piperidine and pyridine alkaloid biosynthesis); map00941(Flavonoid biosynthesis)	COG3424(Q:Secondary metabolites biosynthesis, transport and catabolism)	COG3424(synthase)	PF00195.22(Chal_sti_synt_N:Chalcone and stilbene synthases, N-terminal domain)	sp|P51086|CHS4_TRISU(Chalcone synthase 4 (Fragment) OS=Trifolium subterraneum OX=3900 GN=CHS4 PE=2 SV=1)
MsG0080048352.01	MsG0080048352.01		606	0.171831	-2.54094	0.0446148	0.208422	no	down	0.0426767	-4.55041	6.57272e-10	8.19642e-08	yes	down	0.247535	-2.0143	0.0363425	0.665654	no	down	P51080.1(RecName: Full=Chalcone synthase; AltName: Full=Naringenin-chalcone synthase [Medicago sativa])	GO:0030639(biological_process:polyketide biosynthetic process); GO:0009715(biological_process:chalcone biosynthetic process); GO:0016210(molecular_function:naringenin-chalcone synthase activity); GO:0009813(biological_process:flavonoid biosynthetic process); GO:0102128(molecular_function:chalcone synthase activity); GO:0003824(molecular_function:catalytic activity); GO:0016747(molecular_function:…	K00660	CHS	map04712(Circadian rhythm - plant); map00960(Tropane, piperidine and pyridine alkaloid biosynthesis); map00941(Flavonoid biosynthesis)	COG3424(Q:Secondary metabolites biosynthesis, transport and catabolism)	COG3424(synthase)	PF02797.18(Chal_sti_synt_C:Chalcone and stilbene synthases, C-terminal domain); PF00195.22(Chal_sti_synt_N:Chalcone and stilbene synthases, N-terminal domain); PF08541.13(ACP_syn_III_C:3-Oxoacyl-[acyl-carrier-protein (ACP)] synthase III C terminal); PF08545.13(ACP_syn_III:3-Oxoacyl-[acyl-carrier-protein (ACP)] synthase III)	sp|P51080|CHS7_MEDSA(Chalcone synthase (Fragment) OS=Medicago sativa OX=3879 GN=CHSII PE=2 SV=1)
MsG0080048353.01	MsG0080048353.01		1269	0.996694	-0.00477695	0.993023	0.998463	no	down	0.893387	-0.162643	0.776337	0.923108	no	down	0.893193	-0.162956	0.655109	0.999405	no	down	XP_045832347.1(DNA topoisomerase 1 alpha-like isoform X1 [Trifolium pratense])	GO:0005730(cellular_component:nucleolus); GO:0005634(cellular_component:nucleus); GO:0006265(biological_process:DNA topological change); GO:0003917(molecular_function:DNA topoisomerase type I activity); GO:0006260(biological_process:DNA replication); GO:0003677(molecular_function:DNA binding); GO:0007059(biological_process:chromosome segregation); GO:0005694(cellular_component:chromosome)	K03163	TOP1		COG3569(L:Replication, recombination and repair)	COG3569(Dna topoisomerase)	PF02919.18(Topoisom_I_N:Eukaryotic DNA topoisomerase I, DNA binding fragment)	sp|Q9FJ79|TOP1B_ARATH(DNA topoisomerase 1 beta OS=Arabidopsis thaliana OX=3702 GN=TOP1B PE=1 SV=1)
MsG0080048354.01	MsG0080048354.01		366	0.588818	-0.764107	0.211152	0.50939	no	down	0.431798	-1.21157	0.0977439	0.317012	no	down	0.732215	-0.449662	0.570084	0.999405	no	down	RHN43787.1(putative glutathione transferase [Medicago truncatula])	GO:0005737(cellular_component:cytoplasm); GO:0004364(molecular_function:glutathione transferase activity); GO:0005515(molecular_function:protein binding); GO:0006486(biological_process:protein glycosylation); GO:0016021(cellular_component:integral component of membrane); GO:0030246(molecular_function:carbohydrate binding); GO:0000139(cellular_component:Golgi membrane); GO:0016740(molecular_functi…	K00799	GST, gst	map00480(Glutathione metabolism)	ENOG410XSIX(O:Posttranslational modification, protein turnover, chaperones)	ENOG410XSIX(glutathione Stransferase)	PF02798.23(GST_N:Glutathione S-transferase, N-terminal domain); PF13417.9(GST_N_3:Glutathione S-transferase, N-terminal domain); PF13409.9(GST_N_2:Glutathione S-transferase, N-terminal domain)	sp|Q9FUS8|GSTUH_ARATH(Glutathione S-transferase U17 OS=Arabidopsis thaliana OX=3702 GN=GSTU17 PE=2 SV=1)
MsG0080048355.01	MsG0080048355.01		2349	0.886951	-0.173073	0.838271	0.942813	no	down	0.538701	-0.892443	0.384214	0.684202	no	down	0.605891	-0.722871	0.488941	0.999405	no	down	PNX73392.1(pentatricopeptide repeat-containing protein mitochondrial-like [Trifolium pratense])	GO:0005515(molecular_function:protein binding); GO:0006486(biological_process:protein glycosylation); GO:0016021(cellular_component:integral component of membrane); GO:0030246(molecular_function:carbohydrate binding); GO:0000139(cellular_component:Golgi membrane); GO:0008378(molecular_function:galactosyltransferase activity); GO:0016757(molecular_function:transferase activity, transferring glycos…	K20843	GALT2S		ENOG410ZZ1B(S:Function unknown); ENOG410Z7Z7(S:Function unknown)	ENOG410ZZ1B(UDP-GlcNAc beta-Gal beta-1,3-N-acetylglucosaminyltransferase); ENOG410Z7Z7(Pentatricopeptide repeat-containing protein)	PF13041.9(PPR_2:PPR repeat family); PF12854.10(PPR_1:PPR repeat); PF01535.23(PPR:PPR repeat); PF13812.9(PPR_3:Pentatricopeptide repeat domain); PF17177.7(PPR_long:Pentacotripeptide-repeat region of PRORP); PF01762.24(Galactosyl_T:Galactosyltransferase)	sp|Q8RX55|B3GTI_ARATH(Hydroxyproline O-galactosyltransferase GALT5 OS=Arabidopsis thaliana OX=3702 GN=GALT5 PE=1 SV=1)
MsG0080048356.01	MsG0080048356.01		525	1	0	1	1	no test	no test	1	0	1	1	no test	no test	1	0	1	1	no test	no test	RHN60097.1(hypothetical protein MtrunA17_Chr4g0021661 [Medicago truncatula])	GO:0006508(biological_process:proteolysis); GO:0004190(molecular_function:aspartic-type endopeptidase activity); GO:0043531(molecular_function:ADP binding)
MsG0080048357.01	MsG0080048357.01		1096	1.71614	0.779167	0.662957	0.865657	no	up	2.14923	1.10382	0.532695	0.797931	no	up	1.2449	0.316034	0.416913	0.999405	no	up	RHN66888.1(hypothetical protein MtrunA17_Chr3g0096661 [Medicago truncatula])	GO:0016021(cellular_component:integral component of membrane)				ENOG410Z5QI(S:Function unknown)	ENOG410Z5QI(-)		sp|Q9S728|PDF1_ARATH(Protodermal factor 1 OS=Arabidopsis thaliana OX=3702 GN=PDF1 PE=2 SV=1)
MsG0080048358.01	MsG0080048358.01		684	1	0	1	1	no test	no test	1	0	1	1	no test	no test	1	0	1	1	no test	no test	RHN44925.1(putative transcription factor interactor and regulator CCHC(Zn) family [Medicago truncatula])	GO:0008270(molecular_function:zinc ion binding); GO:0003676(molecular_function:nucleic acid binding)						PF14223.9(Retrotran_gag_2:gag-polypeptide of LTR copia-type); PF00098.26(zf-CCHC:Zinc knuckle)
MsG0080048359.01	MsG0080048359.01		1056	1	0	1	1	no test	no test	1	0	1	1	no test	no test	1	0	1	1	no test	no test	XP_024638371.1(leucine--tRNA ligase, chloroplastic/mitochondrial [Medicago truncatula])	GO:0048608(biological_process:reproductive structure development); GO:0004823(molecular_function:leucine-tRNA ligase activity); GO:0005829(cellular_component:cytosol); GO:0006429(biological_process:leucyl-tRNA aminoacylation); GO:0009791(biological_process:post-embryonic development); GO:0002161(molecular_function:aminoacyl-tRNA editing activity); GO:0005524(molecular_function:ATP binding)	K01869	LARS, leuS	map00970(Aminoacyl-tRNA biosynthesis)	COG0495(J:Translation, ribosomal structure and biogenesis)	COG0495(Leucyl-trna synthetase)		sp|Q9XEA0|SYLM_ARATH(Leucine--tRNA ligase, chloroplastic/mitochondrial OS=Arabidopsis thaliana OX=3702 GN=EMB2369 PE=2 SV=1)
MsG0080048360.01	MsG0080048360.01		255	7.60971	2.92784	0.142278	1	no	up	0.377195	-1.40662	0.693939	1	no	down	0.050633	-4.30378	0.0508957	1	no	down	KAI5417458.1(hypothetical protein KIW84_042169 [Pisum sativum])					ENOG410YRRT(S:Function unknown)	ENOG410YRRT(14 kDa proline-rich protein)
MsG0080048361.01	MsG0080048361.01		1350	1.0559	0.0784683	0.852332	0.949014	no	up	0.783262	-0.352434	0.451913	0.739149	no	down	0.738653	-0.437031	0.284563	0.976999	no	down	XP_003599819.3(callose synthase 7 [Medicago truncatula])	GO:0046527(molecular_function:glucosyltransferase activity); GO:0006075(biological_process:(1->3)-beta-D-glucan biosynthetic process); GO:0016021(cellular_component:integral component of membrane); GO:0000148(cellular_component:1,3-beta-D-glucan synthase complex); GO:0003843(molecular_function:1,3-beta-D-glucan synthase activity); GO:0071555(biological_process:cell wall organization); GO:0008360(…	K11000	CALS		ENOG410XQ8V(S:Function unknown)	ENOG410XQ8V(synthase)	PF14288.9(FKS1_dom1:1,3-beta-glucan synthase subunit FKS1, domain-1)	sp|Q9SHJ3|CALS7_ARATH(Callose synthase 7 OS=Arabidopsis thaliana OX=3702 GN=CALS7 PE=3 SV=3)
MsG0080048362.01	MsG0080048362.01		1053	1	0	1	1	no test	no test	1.48247	0.567999	0.889293	1	no	up	1.34376	0.426279	0.916798	1	no	up	PNY13712.1(callose synthase 7-like protein, partial [Trifolium pratense])	GO:0046527(molecular_function:glucosyltransferase activity); GO:0000148(cellular_component:1,3-beta-D-glucan synthase complex); GO:0006075(biological_process:(1->3)-beta-D-glucan biosynthetic process); GO:0016021(cellular_component:integral component of membrane); GO:0016020(cellular_component:membrane); GO:0003843(molecular_function:1,3-beta-D-glucan synthase activity); GO:0071555(biological_pro…	K11000	CALS		ENOG410XQ8V(S:Function unknown)	ENOG410XQ8V(synthase)	PF14288.9(FKS1_dom1:1,3-beta-glucan synthase subunit FKS1, domain-1); PF04652.19(Vta1:Vta1 like)	sp|Q9SHJ3|CALS7_ARATH(Callose synthase 7 OS=Arabidopsis thaliana OX=3702 GN=CALS7 PE=3 SV=3)
MsG0080048363.01	MsG0080048363.01		3141	6.723	2.74911	0.00284422	0.0318296	yes	up	10.3139	3.36652	2.90981e-06	0.000105348	yes	up	1.54318	0.625907	0.229638	0.961747	no	up	XP_003599818.2(probable sucrose-phosphate synthase 2 [Medicago truncatula])	GO:0046524(molecular_function:sucrose-phosphate synthase activity); GO:0016157(molecular_function:sucrose synthase activity); GO:0005985(biological_process:sucrose metabolic process); GO:0005986(biological_process:sucrose biosynthetic process)	K00696	E2.4.1.14	map00500(Starch and sucrose metabolism)	COG0438(M:Cell wall/membrane/envelope biogenesis)	COG0438(Glycosyl transferase (Group 1)	PF00534.23(Glycos_transf_1:Glycosyl transferases group 1); PF05116.16(S6PP:Sucrose-6F-phosphate phosphohydrolase); PF13692.9(Glyco_trans_1_4:Glycosyl transferases group 1); PF00862.22(Sucrose_synth:Sucrose synthase); PF13579.9(Glyco_trans_4_4:Glycosyl transferase 4-like domain); PF13439.9(Glyco_transf_4:Glycosyltransferase Family 4)	sp|O04933|SPSA2_CRAPL(Probable sucrose-phosphate synthase 2 OS=Craterostigma plantagineum OX=4153 GN=SPS2 PE=2 SV=1)
MsG0080048364.01	MsG0080048364.01		201	1	0	1	1	no test	no test	1	0	1	1	no test	no test	1	0	1	1	no test	no test	AES80300.2(hypothetical protein MTR_7g079050 [Medicago truncatula])
MsG0080048365.01	MsG0080048365.01		1866	0.872532	-0.19672	0.844559	0.944656	no	down	1.07012	0.0977669	0.916388	0.97595	no	up	1.21835	0.284924	0.749634	0.999405	no	up	XP_003599110.1(pentatricopeptide repeat-containing protein At5g40410, mitochondrial [Medicago truncatula])	GO:0008270(molecular_function:zinc ion binding); GO:0005515(molecular_function:protein binding)				ENOG410Z7Z7(S:Function unknown)	ENOG410Z7Z7(Pentatricopeptide repeat-containing protein)	PF01535.23(PPR:PPR repeat); PF13041.9(PPR_2:PPR repeat family); PF14432.9(DYW_deaminase:DYW family of nucleic acid deaminases); PF12854.10(PPR_1:PPR repeat); PF20431.1(E_motif:E motif); PF13812.9(PPR_3:Pentatricopeptide repeat domain)	sp|Q9FND6|PP411_ARATH(Pentatricopeptide repeat-containing protein At5g40410, mitochondrial OS=Arabidopsis thaliana OX=3702 GN=PCMP-H15 PE=2 SV=1)
MsG0080048366.01	MsG0080048366.01		717	1	0	1	1	no test	no test	1	0	1	1	no test	no test	1	0	1	1	no test	no test	AES75899.2(M48 family peptidase [Medicago truncatula])	GO:0051603(biological_process:proteolysis involved in cellular protein catabolic process); GO:0004222(molecular_function:metalloendopeptidase activity); GO:0016021(cellular_component:integral component of membrane); GO:0016020(cellular_component:membrane); GO:0006508(biological_process:proteolysis); GO:0046872(molecular_function:metal ion binding)	K23010	OMA1		COG0501(O:Posttranslational modification, protein turnover, chaperones)	COG0501(Protease HtpX homolog)	PF01435.21(Peptidase_M48:Peptidase family M48)	sp|D3ZS74|OMA1_RAT(Metalloendopeptidase OMA1, mitochondrial OS=Rattus norvegicus OX=10116 GN=Oma1 PE=3 SV=1)
[truncated: 48,579 more rows]
