# Supplementary material for: Identification of Salt-Responsive Genes in Melatonin Regulated Alfalfa Salt Tolerance by Transcriptome Analysis
Source: Preprints.org preprint supplement (doi:10.20944/preprints202403.1815.v2), 2024-04-17
Supplement: Supplementary file 1 [file supplementary › Supplementary Files/Table S4.xlsx]

## Sheet: kegg_enrich_geneset_list_gene
Supplemental table S4. The KEGG enrich pathway was analyzed using R script (WLN_vs_WLCK)
#Study_num	Term	Database	ID	Ratio_in_study	Ratio_in_pop	P-Value	Corrected P-Value	Genes	Hyperlink	typeII	typeI
17	Porphyrin metabolism	KEGG PATHWAY	map00860	17/830	72/18577	1.2851e-08	7.38931e-07	MsG0380017262.01|MsG0380018058.01|MsG0580030056.01|MsG0380016367.01|MsG0380017727.01|MsG0180004747.01|MsG0480022592.01|MsG0880046462.01|MsG0580024435.01|MsG0080048563.01|MsG0080049004.01|MsG0080048059.01|MsG0280006805.01|MsG0480021803.01|MsG0580030199.01|MsG0480023558.01|MsG0080047967.01	http://www.genome.jp/kegg-bin/show_pathway?map=map00860&multi_query=K02492+white,pink%0d%0aK10960+white,red%0d%0aK21480+white,blue%0d%0aK01772+white,blue%0d%0aK01698+white,red%0d%0aK13600+white,red%0d%0aK01749+white,red%0d%0aK19073+white,red%0d%0aK02259+white,red%0d%0aK03403+white,red%0d%0aK22013+white,blue%0d%0aK03428+white,red%0d%0aK03405+white,red%0d%0aK00228+white,red%0d%0aK00231+white,red%0d…	Metabolism of cofactors and vitamins	Metabolism
16	Isoflavonoid biosynthesis	KEGG PATHWAY	map00943	16/830	63/18577	1.11438e-08	1.28153e-06	MsG0480019532.01|MsG0780036582.01|MsG0880045930.01|MsG0780040614.01|MsG0780040613.01|MsG0680030960.01|MsG0280008072.01|MsG0580024986.01|MsG0780040610.01|MsG0480019527.01|MsG0480022833.01|MsG0480022310.01|MsG0780040611.01|MsG0480019510.01|MsG0780040612.01|MsG0480022311.01	http://www.genome.jp/kegg-bin/show_pathway?map=map00943&multi_query=K13262+white,blue%0d%0aK13260+white,blue%0d%0aK22932+white,red%0d%0aK13264+white,blue%0d%0aK25075+white,blue%0d%0aK13259+white,blue%0d%0aK13257+white,blue%0d%0aK05281+white,blue%0d%0a	Biosynthesis of other secondary metabolites	Metabolism
35	Starch and sucrose metabolism	KEGG PATHWAY	map00500	35/830	289/18577	8.58778e-08	3.29198e-06	MsG0180003179.01|MsG0580028893.01|MsG0680034847.01|MsG0180004376.01|MsG0780040339.01|MsG0380011756.01|MsG0380011674.01|MsG0180000436.01|MsG0380014678.01|MsG0480021120.01|MsG0480021135.01|MsG0380016045.01|MsG0580028884.01|MsG0380015190.01|MsG0680034844.01|MsG0480023682.01|MsG0680034969.01|MsG0380017934.01|MsG0480021267.01|MsG0680034846.01|MsG0480021124.01|MsG0380016036.01|MsG0180005516.01|MsG06800…	http://www.genome.jp/kegg-bin/show_pathway?map=map00500&multi_query=K13679+white,red%0d%0aK00847+white,red%0d%0aK00975+white,red%0d%0aK01177+white,red%0d%0aK01835+white,red%0d%0aK01179+white,pink%0d%0aK00963+white,red%0d%0aK00705+white,red%0d%0aK00700+white,red%0d%0aK00688+white,red%0d%0aK05350+white,red%0d%0aK01188+white,pink%0d%0aK01193+white,blue%0d%0aK00695+white,blue%0d%0aK00696+white,red%0d…	Carbohydrate metabolism	Metabolism
44	Plant-pathogen interaction	KEGG PATHWAY	map04626	44/830	440/18577	5.30798e-07	1.52604e-05	MsG0580028980.01|MsG0580024829.01|MsG0780039334.01|MsG0880047235.01|MsG0380014163.01|MsG0880047444.01|MsG0080049128.01|MsG0780036387.01|MsG0580025095.01|MsG0280006794.01|MsG0380014427.01|MsG0680034816.01|MsG0780041753.01|MsG0880047171.01|MsG0580025278.01|MsG0480020857.01|MsG0580025399.01|MsG0580028560.01|MsG0780041537.01|MsG0380014920.01|MsG0580028611.01|MsG0180003547.01|MsG0380011975.01|MsG07800…	http://www.genome.jp/kegg-bin/show_pathway?map=map04626&multi_query=K13433+white,blue%0d%0aK13412+white,blue%0d%0aK18875+white,blue%0d%0aK13448+white,blue%0d%0aK01373+white,blue%0d%0aK15397+white,pink%0d%0aK13457+white,blue%0d%0aK13447+white,blue%0d%0aK05391+white,pink%0d%0aK20536+white,blue%0d%0aK13436+white,blue%0d%0aK13424+white,blue%0d%0aK13434+white,blue%0d%0aK02183+white,blue%0d%0a	Environmental adaptation	Organismal Systems
13	Tropane, piperidine and pyridine alkaloid biosynthesis	KEGG PATHWAY	map00960	13/830	71/18577	1.35267e-05	0.000311115	MsG0080048347.01|MsG0180005357.01|MsG0780036661.01|MsG0380016129.01|MsG0580024260.01|MsG0180005622.01|MsG0180005358.01|MsG0080048348.01|MsG0080048345.01|MsG0180000576.01|MsG0180005623.01|MsG0180005356.01|MsG0880046942.01	http://www.genome.jp/kegg-bin/show_pathway?map=map00960&multi_query=K00811+white,red%0d%0aK00276+white,pink%0d%0aK00660+white,blue%0d%0a	Biosynthesis of other secondary metabolites	Metabolism
10	Linoleic acid metabolism	KEGG PATHWAY	map00591	10/830	48/18577	4.18764e-05	0.000802632	MsG0780041556.01|MsG0780040405.01|MsG0880042750.01|MsG0880042641.01|MsG0480022935.01|MsG0680030362.01|MsG0580025193.01|MsG0880042642.01|MsG0880042645.01|MsG0380015883.01	http://www.genome.jp/kegg-bin/show_pathway?map=map00591&multi_query=K14674+white,blue%0d%0aK00454+white,pink%0d%0aK15718+white,pink%0d%0a	Lipid metabolism	Metabolism
12	Circadian rhythm - plant	KEGG PATHWAY	map04712	12/830	70/18577	5.70274e-05	0.000936879	MsG0080048347.01|MsG0180005357.01|MsG0780041428.01|MsG0180004712.01|MsG0380016129.01|MsG0780036661.01|MsG0580024260.01|MsG0480023945.01|MsG0180005358.01|MsG0080048348.01|MsG0080048345.01|MsG0180005356.01	http://www.genome.jp/kegg-bin/show_pathway?map=map04712&multi_query=K12120+white,red%0d%0aK12116+white,red%0d%0aK12126+white,red%0d%0aK00660+white,blue%0d%0a	Environmental adaptation	Organismal Systems
26	MAPK signaling pathway - plant	KEGG PATHWAY	map04016	26/830	260/18577	0.000110184	0.00158389	MsG0780039334.01|MsG0880042140.01|MsG0880047444.01|MsG0180003836.01|MsG0480023807.01|MsG0880047171.01|MsG0880046092.01|MsG0480020857.01|MsG0380014920.01|MsG0580028560.01|MsG0780041537.01|MsG0380015520.01|MsG0480023688.01|MsG0380016481.01|MsG0580029038.01|MsG0580028807.01|MsG0480018569.01|MsG0080048230.01|MsG0580025278.01|MsG0780036291.01|MsG0180004079.01|MsG0180000980.01|MsG0580024347.01|MsG08800…	http://www.genome.jp/kegg-bin/show_pathway?map=map04016&multi_query=K14497+white,red%0d%0aK17686+white,red%0d%0aK14498+white,blue%0d%0aK13422+white,blue%0d%0aK20725+white,blue%0d%0aK14496+white,blue%0d%0aK13447+white,blue%0d%0aK00940+white,red%0d%0aK20536+white,blue%0d%0aK13424+white,blue%0d%0aK14516+white,blue%0d%0aK02183+white,blue%0d%0a	Signal transduction	Environmental Information Processing
36	Plant hormone signal transduction	KEGG PATHWAY	map04075	36/830	434/18577	0.000281327	0.00359474	MsG0280006783.01|MsG0880047495.01|MsG0780041428.01|MsG0480020539.01|MsG0880042776.01|MsG0380016233.01|MsG0880047330.01|MsG0180003836.01|MsG0880047494.01|MsG0480023807.01|MsG0280008436.01|MsG0880046092.01|MsG0780040418.01|MsG0380015520.01|MsG0180004541.01|MsG0580029038.01|MsG0180004160.01|MsG0080048230.01|MsG0380016348.01|MsG0880046376.01|MsG0480018569.01|MsG0480022917.01|MsG0180001660.01|MsG07800…	http://www.genome.jp/kegg-bin/show_pathway?map=map04075&multi_query=K14486+white,red%0d%0aK14487+white,blue%0d%0aK14497+white,red%0d%0aK14485+white,red%0d%0aK14491+white,blue%0d%0aK14431+white,blue%0d%0aK14493+white,red%0d%0aK14492+white,blue%0d%0aK14484+white,blue%0d%0aK14488+white,blue%0d%0aK14508+white,pink%0d%0aK13464+white,blue%0d%0aK14496+white,blue%0d%0aK12126+white,red%0d%0aK13422+white,b…	Signal transduction	Environmental Information Processing
14	Biosynthesis of various plant secondary metabolites	KEGG PATHWAY	map00999	14/830	109/18577	0.000352167	0.00404992	MsG0680034969.01|MsG0480021120.01|MsG0480021135.01|MsG0580025377.01|MsG0680034730.01|MsG0880045441.01|MsG0580027725.01|MsG0780041403.01|MsG0680034974.01|MsG0680035269.01|MsG0480021124.01|MsG0380012654.01|MsG0480021131.01|MsG0480021361.01	http://www.genome.jp/kegg-bin/show_pathway?map=map00999&multi_query=K01188+white,pink%0d%0aK21568+white,pink%0d%0aK22374+white,pink%0d%0aK05350+white,red%0d%0aK23145+white,red%0d%0aK00789+white,red%0d%0a	Biosynthesis of other secondary metabolites	Metabolism
15	Glyoxylate and dicarboxylate metabolism	KEGG PATHWAY	map00630	15/830	127/18577	0.000548022	0.00572933	MsG0280008554.01|MsG0580029748.01|MsG0580024643.01|MsG0680030463.01|MsG0880043085.01|MsG0280011200.01|MsG0480022584.01|MsG0280011162.01|MsG0080048880.01|MsG0480020295.01|MsG0080048636.01|MsG0280008498.01|MsG0380015217.01|MsG0880041896.01|MsG0180001784.01	http://www.genome.jp/kegg-bin/show_pathway?map=map00630&multi_query=K15919+white,red%0d%0aK01913+white,blue%0d%0aK01915+white,blue%0d%0aK18121+white,red%0d%0aK00025+white,pink%0d%0aK01638+white,red%0d%0aK01637+white,red%0d%0aK00122+white,red%0d%0aK00026+white,red%0d%0aK01647+white,red%0d%0a	Carbohydrate metabolism	Metabolism
17	Pyruvate metabolism	KEGG PATHWAY	map00620	17/830	164/18577	0.00109134	0.0104586	MsG0780039842.01|MsG0280008554.01|MsG0280010854.01|MsG0880041896.01|MsG0880043085.01|MsG0280011063.01|MsG0380015163.01|MsG0480022584.01|MsG0480021968.01|MsG0580029511.01|MsG0380017016.01|MsG0080048636.01|MsG0280008498.01|MsG0680030950.01|MsG0880047656.01|MsG0180001784.01|MsG0780039304.01	http://www.genome.jp/kegg-bin/show_pathway?map=map00620&multi_query=K00002+white,red%0d%0aK01759+white,red%0d%0aK00128+white,red%0d%0aK01913+white,blue%0d%0aK01595+white,red%0d%0aK02160+white,red%0d%0aK01638+white,red%0d%0aK00025+white,pink%0d%0aK00121+white,pink%0d%0aK00026+white,red%0d%0aK18881+white,red%0d%0a	Carbohydrate metabolism	Metabolism
8	Carotenoid biosynthesis	KEGG PATHWAY	map00906	8/830	50/18577	0.00155695	0.0127893	MsG0380016113.01|MsG0180004504.01|MsG0580025259.01|MsG0580028853.01|MsG0580025256.01|MsG0180001539.01|MsG0880045477.01|MsG0180001827.01	http://www.genome.jp/kegg-bin/show_pathway?map=map00906&multi_query=K02291+white,pink%0d%0aK09840+white,red%0d%0aK00514+white,red%0d%0aK09843+white,pink%0d%0a	Metabolism of terpenoids and polyketides	Metabolism
23	Phenylpropanoid biosynthesis	KEGG PATHWAY	map00940	23/830	261/18577	0.00154223	0.0136428	MsG0780040942.01|MsG0580024758.01|MsG0480021518.01|MsG0180004768.01|MsG0480019348.01|MsG0780040945.01|MsG0580024636.01|MsG0180004202.01|MsG0280010150.01|MsG0480022820.01|MsG0780040943.01|MsG0180003604.01|MsG0180005959.01|MsG0580028577.01|MsG0480018185.01|MsG0880045912.01|MsG0280010425.01|MsG0780040944.01|MsG0580024209.01|MsG0280007744.01|MsG0580025389.01|MsG0880046768.01|MsG0180006172.01	http://www.genome.jp/kegg-bin/show_pathway?map=map00940&multi_query=K10775+white,blue%0d%0aK11188+white,red%0d%0aK01904+white,pink%0d%0aK00588+white,blue%0d%0aK18368+white,blue%0d%0aK00430+white,pink%0d%0aK22395+white,blue%0d%0aK09753+white,blue%0d%0a	Biosynthesis of other secondary metabolites	Metabolism
9	Phenylalanine metabolism	KEGG PATHWAY	map00360	9/830	63/18577	0.00184298	0.0141295	MsG0780040942.01|MsG0780040944.01|MsG0880046942.01|MsG0780040943.01|MsG0780040945.01|MsG0180005622.01|MsG0180000576.01|MsG0180005623.01|MsG0480021433.01	http://www.genome.jp/kegg-bin/show_pathway?map=map00360&multi_query=K00811+white,red%0d%0aK00276+white,pink%0d%0aK01426+white,blue%0d%0aK10775+white,blue%0d%0a	Amino acid metabolism	Metabolism
16	ABC transporters	KEGG PATHWAY	map02010	16/830	168/18577	0.00357372	0.0228321	MsG0880047256.01|MsG0680035771.01|MsG0280011350.01|MsG0680030656.01|MsG0280011349.01|MsG0880042368.01|MsG0580025265.01|MsG0180004560.01|MsG0480022655.01|MsG0480021815.01|MsG0680035772.01|MsG0180003146.01|MsG0680031875.01|MsG0180005848.01|MsG0880047259.01|MsG0380011824.01	http://www.genome.jp/kegg-bin/show_pathway?map=map02010&multi_query=K05666+white,blue%0d%0aK05681+white,pink%0d%0aK05658+white,blue%0d%0aK08711+white,blue%0d%0a	Membrane transport	Environmental Information Processing
12	Arginine and proline metabolism	KEGG PATHWAY	map00330	12/830	108/18577	0.00318818	0.022915	MsG0780040428.01|MsG0480019187.01|MsG0780038866.01|MsG0380013491.01|MsG0280011063.01|MsG0880046573.01|MsG0680031116.01|MsG0380015175.01|MsG0180000576.01|MsG0380016507.01|MsG0780036812.01|MsG0480021433.01	http://www.genome.jp/kegg-bin/show_pathway?map=map00330&multi_query=K17839+white,pink%0d%0aK00286+white,red%0d%0aK00128+white,red%0d%0aK00811+white,red%0d%0aK01476+white,red%0d%0aK10536+white,blue%0d%0aK00797+white,red%0d%0aK01426+white,blue%0d%0aK00318+white,blue%0d%0aK12657+white,red%0d%0a	Amino acid metabolism	Metabolism
12	Carbon fixation in photosynthetic organisms	KEGG PATHWAY	map00710	12/830	109/18577	0.00344085	0.0232763	MsG0180001784.01|MsG0480021331.01|MsG0280010854.01|MsG0280009541.01|MsG0880047091.01|MsG0480021968.01|MsG0780040121.01|MsG0780041014.01|MsG0380017962.01|MsG0180006212.01|MsG0880041896.01|MsG0480022584.01	http://www.genome.jp/kegg-bin/show_pathway?map=map00710&multi_query=K01803+white,red%0d%0aK00927+white,red%0d%0aK01595+white,red%0d%0aK01623+white,red%0d%0aK05298+white,red%0d%0aK00615+white,red%0d%0aK00025+white,pink%0d%0aK00026+white,red%0d%0a	Energy metabolism	Metabolism
17	Glutathione metabolism	KEGG PATHWAY	map00480	17/830	186/18577	0.00415481	0.0251475	MsG0580025998.01|MsG0380013544.01|MsG0480022632.01|MsG0080048621.01|MsG0480022820.01|MsG0680031876.01|MsG0380016362.01|MsG0880044882.01|MsG0280008913.01|MsG0380017037.01|MsG0180004880.01|MsG0380016507.01|MsG0780038922.01|MsG0480022634.01|MsG0180004879.01|MsG0480018904.01|MsG0380015192.01	http://www.genome.jp/kegg-bin/show_pathway?map=map00480&multi_query=K01255+white,red%0d%0aK00432+white,blue%0d%0aK11188+white,red%0d%0aK00799+white,pink%0d%0aK00797+white,red%0d%0aK01919+white,blue%0d%0aK00434+white,red%0d%0aK01469+white,red%0d%0a	Metabolism of other amino acids	Metabolism
11	Galactose metabolism	KEGG PATHWAY	map00052	11/830	101/18577	0.00541451	0.0283031	MsG0180000436.01|MsG0580028893.01|MsG0880046441.01|MsG0580030022.01|MsG0180000437.01|MsG0180000438.01|MsG0280011165.01|MsG0180005516.01|MsG0580030055.01|MsG0780039439.01|MsG0180004951.01	http://www.genome.jp/kegg-bin/show_pathway?map=map00052&multi_query=K01193+white,blue%0d%0aK00850+white,blue%0d%0aK00963+white,red%0d%0aK01835+white,red%0d%0aK01785+white,blue%0d%0aK07407+white,red%0d%0aK06617+white,blue%0d%0a	Carbohydrate metabolism	Metabolism
11	alpha-Linolenic acid metabolism	KEGG PATHWAY	map00592	11/830	100/18577	0.0050218	0.0288753	MsG0580024176.01|MsG0380012400.01|MsG0780040405.01|MsG0380015883.01|MsG0180000197.01|MsG0580024170.01|MsG0880042750.01|MsG0480022935.01|MsG0680030362.01|MsG0480019525.01|MsG0280010584.01	http://www.genome.jp/kegg-bin/show_pathway?map=map00592&multi_query=K05894+white,blue%0d%0aK00454+white,pink%0d%0aK01723+white,blue%0d%0aK14674+white,blue%0d%0aK10528+white,red%0d%0aK00224+white,blue%0d%0a	Lipid metabolism	Metabolism
5	Vitamin B6 metabolism	KEGG PATHWAY	map00750	5/830	26/18577	0.00529011	0.0289697	MsG0280011229.01|MsG0880042533.01|MsG0880042538.01|MsG0280011228.01|MsG0780036221.01	http://www.genome.jp/kegg-bin/show_pathway?map=map00750&multi_query=K13248+white,blue%0d%0a	Metabolism of cofactors and vitamins	Metabolism
7	Cutin, suberine and wax biosynthesis	KEGG PATHWAY	map00073	7/830	61/18577	0.0185966	0.0891089	MsG0480023656.01|MsG0180001149.01|MsG0280010503.01|MsG0880042019.01|MsG0180005039.01|MsG0180001150.01|MsG0480020575.01	http://www.genome.jp/kegg-bin/show_pathway?map=map00073&multi_query=K17991+white,blue%0d%0aK13356+white,red%0d%0aK15398+white,red%0d%0aK21995+white,red%0d%0aK15404+white,pink%0d%0a	Lipid metabolism	Metabolism
10	Flavonoid biosynthesis	KEGG PATHWAY	map00941	10/830	104/18577	0.0178666	0.0893329	MsG0080048347.01|MsG0180005357.01|MsG0780036661.01|MsG0380016129.01|MsG0580024260.01|MsG0180005358.01|MsG0080048348.01|MsG0080048345.01|MsG0180005356.01|MsG0880045912.01	http://www.genome.jp/kegg-bin/show_pathway?map=map00941&multi_query=K00588+white,blue%0d%0aK00660+white,blue%0d%0a	Biosynthesis of other secondary metabolites	Metabolism
8	Pentose phosphate pathway	KEGG PATHWAY	map00030	8/830	82/18577	0.0298818	0.132169	MsG0480021331.01|MsG0880047605.01|MsG0880047091.01|MsG0380016576.01|MsG0180005516.01|MsG0180004951.01|MsG0580027701.01|MsG0180006212.01	http://www.genome.jp/kegg-bin/show_pathway?map=map00030&multi_query=K00850+white,blue%0d%0aK00131+white,red%0d%0aK01835+white,red%0d%0aK01623+white,red%0d%0aK01057+white,red%0d%0aK00615+white,red%0d%0a	Carbohydrate metabolism	Metabolism
5	Butanoate metabolism	KEGG PATHWAY	map00650	5/830	39/18577	0.0288081	0.132517	MsG0280011162.01|MsG0280008554.01|MsG0580028896.01|MsG0280011200.01|MsG0280008498.01	http://www.genome.jp/kegg-bin/show_pathway?map=map00650&multi_query=K01913+white,blue%0d%0aK18121+white,red%0d%0aK01580+white,red%0d%0a	Carbohydrate metabolism	Metabolism
11	Glycerolipid metabolism	KEGG PATHWAY	map00561	11/830	132/18577	0.0344469	0.141478	MsG0180004776.01|MsG0880043148.01|MsG0280011063.01|MsG0880046846.01|MsG0880044570.01|MsG0180005959.01|MsG0780039439.01|MsG0780040405.01|MsG0380015501.01|MsG0780039304.01|MsG0680034677.01	http://www.genome.jp/kegg-bin/show_pathway?map=map00561&multi_query=K14674+white,blue%0d%0aK00002+white,red%0d%0aK00901+white,blue%0d%0aK03715+white,blue%0d%0aK00128+white,red%0d%0aK13508+white,pink%0d%0aK01054+white,pink%0d%0aK22920+white,red%0d%0aK07407+white,red%0d%0a	Lipid metabolism	Metabolism
14	Glycolysis / Gluconeogenesis	KEGG PATHWAY	map00010	14/830	182/18577	0.0340029	0.144827	MsG0280008554.01|MsG0480021331.01|MsG0880046441.01|MsG0880047605.01|MsG0280011063.01|MsG0280009541.01|MsG0880047091.01|MsG0180004951.01|MsG0580029511.01|MsG0380017016.01|MsG0180005516.01|MsG0280008498.01|MsG0780041014.01|MsG0780039304.01	http://www.genome.jp/kegg-bin/show_pathway?map=map00010&multi_query=K00850+white,blue%0d%0aK00002+white,red%0d%0aK00131+white,red%0d%0aK01835+white,red%0d%0aK01803+white,red%0d%0aK00128+white,red%0d%0aK01913+white,blue%0d%0aK01785+white,blue%0d%0aK01623+white,red%0d%0aK00927+white,red%0d%0aK00121+white,pink%0d%0a	Carbohydrate metabolism	Metabolism
7	beta-Alanine metabolism	KEGG PATHWAY	map00410	7/830	71/18577	0.0388455	0.148908	MsG0380015175.01|MsG0580028896.01|MsG0880046942.01|MsG0280011063.01|MsG0380013491.01|MsG0180005622.01|MsG0180005623.01	http://www.genome.jp/kegg-bin/show_pathway?map=map00410&multi_query=K00128+white,red%0d%0aK00276+white,pink%0d%0aK17839+white,pink%0d%0aK01580+white,red%0d%0a	Metabolism of other amino acids	Metabolism
9	Cyanoamino acid metabolism	KEGG PATHWAY	map00460	9/830	102/18577	0.0387679	0.153735	MsG0680034969.01|MsG0480021120.01|MsG0480021135.01|MsG0380017168.01|MsG0680034974.01|MsG0680035269.01|MsG0480021124.01|MsG0380012654.01|MsG0480021131.01	http://www.genome.jp/kegg-bin/show_pathway?map=map00460&multi_query=K01188+white,pink%0d%0aK05350+white,red%0d%0aK13051+white,blue%0d%0a	Metabolism of other amino acids	Metabolism
11	Purine metabolism	KEGG PATHWAY	map00230	11/830	137/18577	0.0432914	0.155579	MsG0580024735.01|MsG0280006695.01|MsG0680031711.01|MsG0780041331.01|MsG0480023688.01|MsG0180005516.01|MsG0780040519.01|MsG0780040139.01|MsG0780040021.01|MsG0780040022.01|MsG0780040138.01	http://www.genome.jp/kegg-bin/show_pathway?map=map00230&multi_query=K01835+white,red%0d%0aK01466+white,red%0d%0aK00942+white,blue%0d%0aK00860+white,blue%0d%0aK00951+white,red%0d%0aK14641+white,pink%0d%0aK00940+white,red%0d%0a	Nucleotide metabolism	Metabolism
9	Pyrimidine metabolism	KEGG PATHWAY	map00240	9/830	104/18577	0.0430509	0.159705	MsG0680031711.01|MsG0880045368.01|MsG0480023688.01|MsG0880045384.01|MsG0780040139.01|MsG0780040021.01|MsG0780040022.01|MsG0880046230.01|MsG0780040138.01	http://www.genome.jp/kegg-bin/show_pathway?map=map00240&multi_query=K14641+white,pink%0d%0aK00940+white,red%0d%0aK01937+white,blue%0d%0aK00876+white,red%0d%0a	Nucleotide metabolism	Metabolism
13	Cysteine and methionine metabolism	KEGG PATHWAY	map00270	13/830	177/18577	0.0543471	0.164471	MsG0180005586.01|MsG0680031876.01|MsG0880047697.01|MsG0780040660.01|MsG0880043063.01|MsG0180001784.01|MsG0580029389.01|MsG0780041403.01|MsG0180000576.01|MsG0380016507.01|MsG0680031666.01|MsG0880041896.01|MsG0480022584.01	http://www.genome.jp/kegg-bin/show_pathway?map=map00270&multi_query=K01919+white,blue%0d%0aK00547+white,pink%0d%0aK00640+white,red%0d%0aK00025+white,pink%0d%0aK00811+white,red%0d%0aK05933+white,blue%0d%0aK00797+white,red%0d%0aK00789+white,red%0d%0aK00026+white,red%0d%0aK00549+white,red%0d%0a	Amino acid metabolism	Metabolism
17	Amino sugar and nucleotide sugar metabolism	KEGG PATHWAY	map00520	17/830	245/18577	0.0487391	0.164853	MsG0380017684.01|MsG0580028893.01|MsG0780041647.01|MsG0380017786.01|MsG0480021267.01|MsG0380015844.01|MsG0480022232.01|MsG0880043920.01|MsG0180003179.01|MsG0780036638.01|MsG0380016036.01|MsG0180005516.01|MsG0180005764.01|MsG0380015899.01|MsG0880047055.01|MsG0280008352.01|MsG0180004312.01	http://www.genome.jp/kegg-bin/show_pathway?map=map00520&multi_query=K01183+white,red%0d%0aK00847+white,red%0d%0aK15920+white,red%0d%0aK00975+white,red%0d%0aK00963+white,red%0d%0aK08678+white,red%0d%0aK00966+white,red%0d%0aK01835+white,red%0d%0aK13379+white,red%0d%0aK00326+white,blue%0d%0aK00012+white,red%0d%0aK10046+white,red%0d%0a	Carbohydrate metabolism	Metabolism
6	Arginine biosynthesis	KEGG PATHWAY	map00220	6/830	59/18577	0.0473659	0.165063	MsG0480019187.01|MsG0380015217.01|MsG0680031695.01|MsG0180000576.01|MsG0180000600.01|MsG0380015691.01	http://www.genome.jp/kegg-bin/show_pathway?map=map00220&multi_query=K00261+white,blue%0d%0aK00145+white,red%0d%0aK01940+white,red%0d%0aK00811+white,red%0d%0aK01476+white,red%0d%0aK01915+white,blue%0d%0a	Amino acid metabolism	Metabolism
6	SNARE interactions in vesicular transport	KEGG PATHWAY	map04130	6/830	61/18577	0.0542341	0.168565	MsG0380013070.01|MsG0880045141.01|MsG0580025491.01|MsG0780041198.01|MsG0180003240.01|MsG0180003241.01	http://www.genome.jp/kegg-bin/show_pathway?map=map04130&multi_query=K08488+white,pink%0d%0aK08486+white,blue%0d%0aK08493+white,red%0d%0a	Folding, sorting and degradation	Genetic Information Processing
5	Nitrogen metabolism	KEGG PATHWAY	map00910	5/830	46/18577	0.0533126	0.170304	MsG0380015217.01|MsG0480020754.01|MsG0480020755.01|MsG0680031695.01|MsG0180003350.01	http://www.genome.jp/kegg-bin/show_pathway?map=map00910&multi_query=K00261+white,blue%0d%0aK01915+white,blue%0d%0aK02575+white,blue%0d%0aK01674+white,red%0d%0a	Energy metabolism	Metabolism
4	Isoquinoline alkaloid biosynthesis	KEGG PATHWAY	map00950	4/830	33/18577	0.0580132	0.171065	MsG0180005622.01|MsG0180005623.01|MsG0880046942.01|MsG0180000576.01	http://www.genome.jp/kegg-bin/show_pathway?map=map00950&multi_query=K00811+white,red%0d%0aK00276+white,pink%0d%0a	Biosynthesis of other secondary metabolites	Metabolism
9	Ascorbate and aldarate metabolism	KEGG PATHWAY	map00053	9/830	108/18577	0.0525436	0.172643	MsG0780041647.01|MsG0880042495.01|MsG0880042930.01|MsG0380016362.01|MsG0580026645.01|MsG0280011063.01|MsG0880042909.01|MsG0780039304.01|MsG0480022232.01	http://www.genome.jp/kegg-bin/show_pathway?map=map00053&multi_query=K00002+white,red%0d%0aK10046+white,red%0d%0aK00128+white,red%0d%0aK00012+white,red%0d%0aK00469+white,blue%0d%0aK00103+white,blue%0d%0aK00434+white,red%0d%0a	Carbohydrate metabolism	Metabolism
8	Fructose and mannose metabolism	KEGG PATHWAY	map00051	8/830	95/18577	0.0621142	0.178578	MsG0480021331.01|MsG0380015844.01|MsG0480019898.01|MsG0180003179.01|MsG0880047091.01|MsG0780041014.01|MsG0180004951.01|MsG0180004312.01	http://www.genome.jp/kegg-bin/show_pathway?map=map00051&multi_query=K00966+white,red%0d%0aK00847+white,red%0d%0aK01803+white,red%0d%0aK01623+white,red%0d%0aK19355+white,blue%0d%0aK00850+white,blue%0d%0a	Carbohydrate metabolism	Metabolism
6	Tyrosine metabolism	KEGG PATHWAY	map00350	6/830	64/18577	0.0656096	0.179645	MsG0880046942.01|MsG0180005622.01|MsG0580029511.01|MsG0380017016.01|MsG0180000576.01|MsG0180005623.01	http://www.genome.jp/kegg-bin/show_pathway?map=map00350&multi_query=K00811+white,red%0d%0aK00276+white,pink%0d%0aK00121+white,pink%0d%0a	Amino acid metabolism	Metabolism
3	Photosynthesis - antenna proteins	KEGG PATHWAY	map00196	3/830	21/18577	0.0649468	0.182168	MsG0480022765.01|MsG0880042858.01|MsG0680030759.01	http://www.genome.jp/kegg-bin/show_pathway?map=map00196&multi_query=K08908+white,red%0d%0aK08912+white,red%0d%0a	Energy metabolism	Metabolism
7	Fatty acid biosynthesis	KEGG PATHWAY	map00061	7/830	82/18577	0.0735974	0.19683	MsG0780039842.01|MsG0180001085.01|MsG0880047322.01|MsG0680030950.01|MsG0180005565.01|MsG0180001276.01|MsG0180004774.01	http://www.genome.jp/kegg-bin/show_pathway?map=map00061&multi_query=K01897+white,red%0d%0aK02160+white,red%0d%0aK09458+white,red%0d%0a	Lipid metabolism	Metabolism
7	Fatty acid degradation	KEGG PATHWAY	map00071	7/830	82/18577	0.0735974	0.19683	MsG0180001085.01|MsG0280011063.01|MsG0580029511.01|MsG0380017016.01|MsG0180001276.01|MsG0780036946.01|MsG0180004774.01	http://www.genome.jp/kegg-bin/show_pathway?map=map00071&multi_query=K00128+white,red%0d%0aK01897+white,red%0d%0aK07517+white,blue%0d%0aK00121+white,pink%0d%0a	Lipid metabolism	Metabolism
5	Diterpenoid biosynthesis	KEGG PATHWAY	map00904	5/830	52/18577	0.0816254	0.208598	MsG0280007778.01|MsG0180004772.01|MsG0180005519.01|MsG0280007779.01|MsG0480022793.01	http://www.genome.jp/kegg-bin/show_pathway?map=map00904&multi_query=K04125+white,blue%0d%0aK05282+white,blue%0d%0aK04123+white,pink%0d%0a	Metabolism of terpenoids and polyketides	Metabolism
1	Glycosphingolipid biosynthesis - lacto and neolacto series	KEGG PATHWAY	map00601	1/830	2/18577	0.0873639	0.21841	MsG0780039190.01	http://www.genome.jp/kegg-bin/show_pathway?map=map00601&multi_query=K01988+white,blue%0d%0a	Glycan biosynthesis and metabolism	Metabolism
7	Alanine, aspartate and glutamate metabolism	KEGG PATHWAY	map00250	7/830	87/18577	0.093982	0.229956	MsG0580028896.01|MsG0580028450.01|MsG0380017168.01|MsG0680031695.01|MsG0180000576.01|MsG0380015217.01|MsG0380015691.01	http://www.genome.jp/kegg-bin/show_pathway?map=map00250&multi_query=K01953+white,red%0d%0aK00261+white,blue%0d%0aK01940+white,red%0d%0aK13051+white,blue%0d%0aK00811+white,red%0d%0aK01580+white,red%0d%0aK01915+white,blue%0d%0a	Amino acid metabolism	Metabolism
3	Thiamine metabolism	KEGG PATHWAY	map00730	3/830	26/18577	0.108037	0.258838	MsG0880045229.01|MsG0180005666.01|MsG0380014728.01	http://www.genome.jp/kegg-bin/show_pathway?map=map00730&multi_query=K03147+white,red%0d%0aK03146+white,red%0d%0aK01662+white,blue%0d%0a	Metabolism of cofactors and vitamins	Metabolism
4	Folate biosynthesis	KEGG PATHWAY	map00790	4/830	44/18577	0.132277	0.310446	MsG0080048312.01|MsG0880042541.01|MsG0280006476.01|MsG0480022299.01	http://www.genome.jp/kegg-bin/show_pathway?map=map00790&multi_query=K00079+white,blue%0d%0aK14652+white,blue%0d%0aK01495+white,blue%0d%0a	Metabolism of cofactors and vitamins	Metabolism
3	Taurine and hypotaurine metabolism	KEGG PATHWAY	map00430	3/830	35/18577	0.204565	0.461274	MsG0280008495.01|MsG0580028896.01|MsG0280008553.01	http://www.genome.jp/kegg-bin/show_pathway?map=map00430&multi_query=K01580+white,red%0d%0aK00485+white,blue%0d%0a	Metabolism of other amino acids	Metabolism
1	Exopolysaccharide biosynthesis	KEGG PATHWAY	map00543	1/830	5/18577	0.204325	0.469947	MsG0880043063.01	http://www.genome.jp/kegg-bin/show_pathway?map=map00543&multi_query=K00640+white,red%0d%0a	Glycan biosynthesis and metabolism	Metabolism
7	Inositol phosphate metabolism	KEGG PATHWAY	map00562	7/830	112/18577	0.234545	0.499493	MsG0880042495.01|MsG0480023344.01|MsG0580026645.01|MsG0880046067.01|MsG0880042808.01|MsG0780041014.01|MsG0180005731.01	http://www.genome.jp/kegg-bin/show_pathway?map=map00562&multi_query=K01803+white,red%0d%0aK24221+white,blue%0d%0aK01858+white,red%0d%0aK00913+white,blue%0d%0aK00469+white,blue%0d%0aK22913+white,blue%0d%0a	Carbohydrate metabolism	Metabolism
4	Phenylalanine, tyrosine and tryptophan biosynthesis	KEGG PATHWAY	map00400	4/830	55/18577	0.230456	0.500046	MsG0180000530.01|MsG0280010484.01|MsG0380015531.01|MsG0180000576.01	http://www.genome.jp/kegg-bin/show_pathway?map=map00400&multi_query=K00811+white,red%0d%0aK01850+white,blue%0d%0aK05359+white,blue%0d%0aK15227+white,blue%0d%0a	Amino acid metabolism	Metabolism
6	Tryptophan metabolism	KEGG PATHWAY	map00380	6/830	92/18577	0.228658	0.505687	MsG0480020076.01|MsG0280011063.01|MsG0480020072.01|MsG0680035661.01|MsG0380016112.01|MsG0480021433.01	http://www.genome.jp/kegg-bin/show_pathway?map=map00380&multi_query=K11816+white,red%0d%0aK00128+white,red%0d%0aK22588+white,pink%0d%0aK01426+white,blue%0d%0a	Amino acid metabolism	Metabolism
5	Ubiquinone and other terpenoid-quinone biosynthesis	KEGG PATHWAY	map00130	5/830	76/18577	0.252118	0.527155	MsG0180003114.01|MsG0580025389.01|MsG0180004177.01|MsG0880044676.01|MsG0580024209.01	http://www.genome.jp/kegg-bin/show_pathway?map=map00130&multi_query=K03809+white,blue%0d%0aK12501+white,red%0d%0aK01904+white,pink%0d%0aK12502+white,red%0d%0a	Metabolism of cofactors and vitamins	Metabolism
2	Arachidonic acid metabolism	KEGG PATHWAY	map00590	2/830	24/18577	0.291374	0.549312	MsG0780040405.01|MsG0480022299.01	http://www.genome.jp/kegg-bin/show_pathway?map=map00590&multi_query=K14674+white,blue%0d%0aK00079+white,blue%0d%0a	Lipid metabolism	Metabolism
9	Glycerophospholipid metabolism	KEGG PATHWAY	map00564	9/830	158/18577	0.275222	0.555271	MsG0680032191.01|MsG0780039481.01|MsG0180005414.01|MsG0180004776.01|MsG0880043148.01|MsG0780040005.01|MsG0780040405.01|MsG0880044570.01|MsG0380017894.01	http://www.genome.jp/kegg-bin/show_pathway?map=map00564&multi_query=K25193+white,red%0d%0aK18696+white,blue%0d%0aK01115+white,blue%0d%0aK13508+white,pink%0d%0aK01126+white,red%0d%0aK00901+white,blue%0d%0aK14674+white,blue%0d%0a	Lipid metabolism	Metabolism
4	Fatty acid elongation	KEGG PATHWAY	map00062	4/830	61/18577	0.289954	0.555745	MsG0480020578.01|MsG0180004283.01|MsG0180004168.01|MsG0680034760.01	http://www.genome.jp/kegg-bin/show_pathway?map=map00062&multi_query=K15397+white,pink%0d%0a	Lipid metabolism	Metabolism
7	Phosphatidylinositol signaling system	KEGG PATHWAY	map04070	7/830	119/18577	0.28262	0.560367	MsG0880047171.01|MsG0580025278.01|MsG0880047444.01|MsG0880044570.01|MsG0680030719.01|MsG0780036291.01|MsG0180005731.01	http://www.genome.jp/kegg-bin/show_pathway?map=map04070&multi_query=K13024+white,blue%0d%0aK02183+white,blue%0d%0aK00913+white,blue%0d%0aK00901+white,blue%0d%0a	Signal transduction	Environmental Information Processing
3	Ether lipid metabolism	KEGG PATHWAY	map00565	3/830	42/18577	0.289071	0.563443	MsG0780040405.01|MsG0780039481.01|MsG0380017894.01	http://www.genome.jp/kegg-bin/show_pathway?map=map00565&multi_query=K14674+white,blue%0d%0aK01115+white,blue%0d%0a	Lipid metabolism	Metabolism
2	Glycosphingolipid biosynthesis - globo and isoglobo series	KEGG PATHWAY	map00603	2/830	23/18577	0.274567	0.563843	MsG0780039190.01|MsG0780039439.01	http://www.genome.jp/kegg-bin/show_pathway?map=map00603&multi_query=K07407+white,red%0d%0aK01988+white,blue%0d%0a	Glycan biosynthesis and metabolism	Metabolism
2	Biotin metabolism	KEGG PATHWAY	map00780	2/830	25/18577	0.30813	0.571531	MsG0880047322.01|MsG0180005565.01	http://www.genome.jp/kegg-bin/show_pathway?map=map00780&multi_query=K09458+white,red%0d%0a	Metabolism of cofactors and vitamins	Metabolism
2	Monobactam biosynthesis	KEGG PATHWAY	map00261	2/830	25/18577	0.30813	0.571531	MsG0880043457.01|MsG0880043456.01	http://www.genome.jp/kegg-bin/show_pathway?map=map00261&multi_query=K01714+white,red%0d%0a	Biosynthesis of other secondary metabolites	Metabolism
2	Lysine biosynthesis	KEGG PATHWAY	map00300	2/830	26/18577	0.324804	0.583632	MsG0880043457.01|MsG0880043456.01	http://www.genome.jp/kegg-bin/show_pathway?map=map00300&multi_query=K01714+white,red%0d%0a	Amino acid metabolism	Metabolism
4	Pantothenate and CoA biosynthesis	KEGG PATHWAY	map00770	4/830	66/18577	0.340957	0.603231	MsG0380015175.01|MsG0480021962.01|MsG0380013491.01|MsG0280011063.01	http://www.genome.jp/kegg-bin/show_pathway?map=map00770&multi_query=K00128+white,red%0d%0aK17839+white,pink%0d%0aK00053+white,red%0d%0a	Metabolism of cofactors and vitamins	Metabolism
2	Riboflavin metabolism	KEGG PATHWAY	map00740	2/830	28/18577	0.357808	0.623453	MsG0080048312.01|MsG0280006476.01	http://www.genome.jp/kegg-bin/show_pathway?map=map00740&multi_query=K14652+white,blue%0d%0a	Metabolism of cofactors and vitamins	Metabolism
3	Steroid biosynthesis	KEGG PATHWAY	map00100	3/830	50/18577	0.387846	0.665706	MsG0680035881.01|MsG0780040405.01|MsG0480021486.01	http://www.genome.jp/kegg-bin/show_pathway?map=map00100&multi_query=K01853+white,blue%0d%0aK14674+white,blue%0d%0aK09828+white,red%0d%0a	Lipid metabolism	Metabolism
4	Sesquiterpenoid and triterpenoid biosynthesis	KEGG PATHWAY	map00909	4/830	74/18577	0.422685	0.704475	MsG0880042578.01|MsG0480018096.01|MsG0480020344.01|MsG0480018092.01	http://www.genome.jp/kegg-bin/show_pathway?map=map00909&multi_query=K20658+white,red%0d%0aK15813+white,red%0d%0aK15803+white,blue%0d%0a	Metabolism of terpenoids and polyketides	Metabolism
6	Phagosome	KEGG PATHWAY	map04145	6/830	116/18577	0.416858	0.70498	MsG0880045141.01|MsG0780040472.01|MsG0580025491.01|MsG0780039847.01|MsG0780040365.01|MsG0480018845.01	http://www.genome.jp/kegg-bin/show_pathway?map=map04145&multi_query=K08488+white,pink%0d%0aK07375+white,pink%0d%0aK08057+white,blue%0d%0a	Transport and catabolism	Cellular Processes
4	Citrate cycle (TCA cycle)	KEGG PATHWAY	map00020	4/830	75/18577	0.43277	0.710979	MsG0580029748.01|MsG0880041896.01|MsG0480022584.01|MsG0180001784.01	http://www.genome.jp/kegg-bin/show_pathway?map=map00020&multi_query=K00025+white,pink%0d%0aK00026+white,red%0d%0aK01647+white,red%0d%0a	Carbohydrate metabolism	Metabolism
1	Limonene and pinene degradation	KEGG PATHWAY	map00903	1/830	13/18577	0.448105	0.715723	MsG0280011063.01	http://www.genome.jp/kegg-bin/show_pathway?map=map00903&multi_query=K00128+white,red%0d%0a	Metabolism of terpenoids and polyketides	Metabolism
4	Terpenoid backbone biosynthesis	KEGG PATHWAY	map00900	4/830	76/18577	0.442806	0.717221	MsG0880045229.01|MsG0880042291.01|MsG0480022890.01|MsG0880046462.01	http://www.genome.jp/kegg-bin/show_pathway?map=map00900&multi_query=K00099+white,red%0d%0aK13789+white,red%0d%0aK01662+white,blue%0d%0aK10960+white,red%0d%0a	Metabolism of terpenoids and polyketides	Metabolism
2	Other glycan degradation	KEGG PATHWAY	map00511	2/830	36/18577	0.482448	0.760021	MsG0380017000.01|MsG0180005790.01	http://www.genome.jp/kegg-bin/show_pathway?map=map00511&multi_query=K01191+white,red%0d%0aK15923+white,red%0d%0a	Glycan biosynthesis and metabolism	Metabolism
1	Monoterpenoid biosynthesis	KEGG PATHWAY	map00902	1/830	15/18577	0.496354	0.761076	MsG0880043246.01	http://www.genome.jp/kegg-bin/show_pathway?map=map00902&multi_query=K15095+white,blue%0d%0a	Metabolism of terpenoids and polyketides	Metabolism
3	Mismatch repair	KEGG PATHWAY	map03430	3/830	59/18577	0.494441	0.768388	MsG0280009996.01|MsG0180005940.01|MsG0880044794.01	http://www.genome.jp/kegg-bin/show_pathway?map=map03430&multi_query=K07466+white,red%0d%0aK10747+white,red%0d%0aK03504+white,blue%0d%0a	Replication and repair	Genetic Information Processing
4	DNA replication	KEGG PATHWAY	map03030	4/830	85/18577	0.530144	0.802192	MsG0280009996.01|MsG0180005940.01|MsG0280008039.01|MsG0880044794.01	http://www.genome.jp/kegg-bin/show_pathway?map=map03030&multi_query=K10747+white,red%0d%0aK07466+white,red%0d%0aK02542+white,blue%0d%0aK03504+white,blue%0d%0a	Replication and repair	Genetic Information Processing
2	Nicotinate and nicotinamide metabolism	KEGG PATHWAY	map00760	2/830	41/18577	0.552408	0.814447	MsG0880046281.01|MsG0180004734.01	http://www.genome.jp/kegg-bin/show_pathway?map=map00760&multi_query=K18551+white,blue%0d%0aK03517+white,red%0d%0a	Metabolism of cofactors and vitamins	Metabolism
3	Sphingolipid metabolism	KEGG PATHWAY	map00600	3/830	65/18577	0.560129	0.815377	MsG0380014651.01|MsG0580026143.01|MsG0780039439.01	http://www.genome.jp/kegg-bin/show_pathway?map=map00600&multi_query=K04713+white,blue%0d%0aK07407+white,red%0d%0aK12349+white,red%0d%0a	Lipid metabolism	Metabolism
6	Peroxisome	KEGG PATHWAY	map04146	6/830	133/18577	0.549043	0.819999	MsG0480020691.01|MsG0180001085.01|MsG0280010503.01|MsG0480020705.01|MsG0180001276.01|MsG0180004774.01	http://www.genome.jp/kegg-bin/show_pathway?map=map04146&multi_query=K01897+white,red%0d%0aK04565+white,red%0d%0aK13356+white,red%0d%0a	Transport and catabolism	Cellular Processes
1	Brassinosteroid biosynthesis	KEGG PATHWAY	map00905	1/830	20/18577	0.599337	0.861547	MsG0880042748.01	http://www.genome.jp/kegg-bin/show_pathway?map=map00905&multi_query=K20623+white,blue%0d%0a	Metabolism of terpenoids and polyketides	Metabolism
5	Glycine, serine and threonine metabolism	KEGG PATHWAY	map00260	5/830	121/18577	0.633543	0.899475	MsG0380012759.01|MsG0180005622.01|MsG0580024643.01|MsG0880046942.01|MsG0180005623.01	http://www.genome.jp/kegg-bin/show_pathway?map=map00260&multi_query=K00276+white,pink%0d%0aK12235+white,blue%0d%0aK15919+white,red%0d%0a	Amino acid metabolism	Metabolism
1	Histidine metabolism	KEGG PATHWAY	map00340	1/830	23/18577	0.650732	0.901617	MsG0280011063.01	http://www.genome.jp/kegg-bin/show_pathway?map=map00340&multi_query=K00128+white,red%0d%0a	Amino acid metabolism	Metabolism
2	Sulfur metabolism	KEGG PATHWAY	map00920	2/830	49/18577	0.649842	0.911363	MsG0580024735.01|MsG0880043063.01	http://www.genome.jp/kegg-bin/show_pathway?map=map00920&multi_query=K00860+white,blue%0d%0aK00640+white,red%0d%0a	Energy metabolism	Metabolism
1	D-Amino acid metabolism	KEGG PATHWAY	map00470	1/830	24/18577	0.666356	0.912274	MsG0380012759.01	http://www.genome.jp/kegg-bin/show_pathway?map=map00470&multi_query=K12235+white,blue%0d%0a	Metabolism of other amino acids	Metabolism
1	Valine, leucine and isoleucine biosynthesis	KEGG PATHWAY	map00290	1/830	25/18577	0.681283	0.921735	MsG0480021962.01	http://www.genome.jp/kegg-bin/show_pathway?map=map00290&multi_query=K00053+white,red%0d%0a	Amino acid metabolism	Metabolism
1	Stilbenoid, diarylheptanoid and gingerol biosynthesis	KEGG PATHWAY	map00945	1/830	26/18577	0.695542	0.930085	MsG0880045912.01	http://www.genome.jp/kegg-bin/show_pathway?map=map00945&multi_query=K00588+white,blue%0d%0a	Biosynthesis of other secondary metabolites	Metabolism
2	Propanoate metabolism	KEGG PATHWAY	map00640	2/830	55/18577	0.711274	0.94019	MsG0780039842.01|MsG0680030950.01	http://www.genome.jp/kegg-bin/show_pathway?map=map00640&multi_query=K02160+white,red%0d%0a	Carbohydrate metabolism	Metabolism
1	Glycosaminoglycan degradation	KEGG PATHWAY	map00531	1/830	29/18577	0.734608	0.96	MsG0780036008.01	http://www.genome.jp/kegg-bin/show_pathway?map=map00531&multi_query=K10532+white,red%0d%0a	Glycan biosynthesis and metabolism	Metabolism
4	Homologous recombination	KEGG PATHWAY	map03440	4/830	116/18577	0.767056	0.99114	MsG0280009996.01|MsG0880047438.01|MsG0180005940.01|MsG0280006340.01	http://www.genome.jp/kegg-bin/show_pathway?map=map03440&multi_query=K07466+white,red%0d%0aK04728+white,red%0d%0aK10901+white,blue%0d%0aK03504+white,blue%0d%0a	Replication and repair	Genetic Information Processing
1	Selenocompound metabolism	KEGG PATHWAY	map00450	1/830	35/18577	0.79836	0.99795	MsG0680031666.01	http://www.genome.jp/kegg-bin/show_pathway?map=map00450&multi_query=K00549+white,red%0d%0a	Metabolism of other amino acids	Metabolism
5	Spliceosome	KEGG PATHWAY	map03040	5/830	425/18577	0.999975	0.999975	MsG0680031848.01|MsG0180000538.01|MsG0380014125.01|MsG0280006307.01|MsG0880047581.01	http://www.genome.jp/kegg-bin/show_pathway?map=map03040&multi_query=K12741+white,red%0d%0aK12813+white,blue%0d%0aK03283+white,pink%0d%0a	Transcription	Genetic Information Processing
1	Flavone and flavonol biosynthesis	KEGG PATHWAY	map00944	1/830	34/18577	0.788912	1	MsG0680030960.01	http://www.genome.jp/kegg-bin/show_pathway?map=map00944&multi_query=K13264+white,blue%0d%0a	Biosynthesis of other secondary metabolites	Metabolism
2	Base excision repair	KEGG PATHWAY	map03410	2/830	65/18577	0.793468	1	MsG0280009996.01|MsG0880044794.01	http://www.genome.jp/kegg-bin/show_pathway?map=map03410&multi_query=K10747+white,red%0d%0aK03504+white,blue%0d%0a	Replication and repair	Genetic Information Processing
3	Nucleotide excision repair	KEGG PATHWAY	map03420	3/830	98/18577	0.819528	1	MsG0280009996.01|MsG0180005940.01|MsG0880044794.01	http://www.genome.jp/kegg-bin/show_pathway?map=map03420&multi_query=K10747+white,red%0d%0aK07466+white,red%0d%0aK03504+white,blue%0d%0a	Replication and repair	Genetic Information Processing
1	Zeatin biosynthesis	KEGG PATHWAY	map00908	1/830	40/18577	0.839631	1	MsG0180001050.01	http://www.genome.jp/kegg-bin/show_pathway?map=map00908&multi_query=K13495+white,blue%0d%0a	Metabolism of terpenoids and polyketides	Metabolism
1	Various types of N-glycan biosynthesis	KEGG PATHWAY	map00513	1/830	45/18577	0.872463	1	MsG0580025498.01	http://www.genome.jp/kegg-bin/show_pathway?map=map00513&multi_query=K07441+white,blue%0d%0a	Glycan biosynthesis and metabolism	Metabolism
1	Autophagy - other	KEGG PATHWAY	map04136	1/830	46/18577	0.878175	1	MsG0280007253.01	http://www.genome.jp/kegg-bin/show_pathway?map=map04136&multi_query=K08341+white,blue%0d%0a	Transport and catabolism	Cellular Processes
2	Viral life cycle - HIV-1	KEGG PATHWAY	map03250	2/830	84/18577	0.894545	1	MsG0680035844.01|MsG0380016859.01	http://www.genome.jp/kegg-bin/show_pathway?map=map03250&multi_query=K12194+white,blue%0d%0aK12195+white,blue%0d%0a	Information processing in viruses	Genetic Information Processing
12	Endocytosis	KEGG PATHWAY	map04144	12/830	365/18577	0.895261	1	MsG0880042964.01|MsG0780039481.01|MsG0680031848.01|MsG0880047581.01|MsG0480020986.01|MsG0280006307.01|MsG0780040758.01|MsG0380017000.01|MsG0380016859.01|MsG0680035844.01|MsG0580025770.01|MsG0380017894.01	http://www.genome.jp/kegg-bin/show_pathway?map=map04144&multi_query=K12192+white,blue%0d%0aK11866+white,blue%0d%0aK12194+white,blue%0d%0aK12195+white,blue%0d%0aK01115+white,blue%0d%0aK12471+white,blue%0d%0aK12489+white,red%0d%0aK07904+white,blue%0d%0aK03283+white,pink%0d%0a	Transport and catabolism	Cellular Processes
8	Pentose and glucuronate interconversions	KEGG PATHWAY	map00040	8/830	268/18577	0.915846	1	MsG0580028893.01|MsG0480022232.01|MsG0780038307.01|MsG0880045766.01|MsG0480019217.01|MsG0380016245.01|MsG0180004630.01|MsG0780039304.01	http://www.genome.jp/kegg-bin/show_pathway?map=map00040&multi_query=K01051+white,blue%0d%0aK00012+white,red%0d%0aK00002+white,red%0d%0aK01728+white,pink%0d%0aK00963+white,red%0d%0a	Carbohydrate metabolism	Metabolism
1	Biosynthesis of unsaturated fatty acids	KEGG PATHWAY	map01040	1/830	57/18577	0.926419	1	MsG0780040579.01	http://www.genome.jp/kegg-bin/show_pathway?map=map01040&multi_query=K10256+white,red%0d%0a	Lipid metabolism	Metabolism
1	N-Glycan biosynthesis	KEGG PATHWAY	map00510	1/830	64/18577	0.946623	1	MsG0580025498.01	http://www.genome.jp/kegg-bin/show_pathway?map=map00510&multi_query=K07441+white,blue%0d%0a	Glycan biosynthesis and metabolism	Metabolism
1	Lysine degradation	KEGG PATHWAY	map00310	1/830	67/18577	0.953486	1	MsG0280011063.01	http://www.genome.jp/kegg-bin/show_pathway?map=map00310&multi_query=K00128+white,red%0d%0a	Amino acid metabolism	Metabolism
1	Valine, leucine and isoleucine degradation	KEGG PATHWAY	map00280	1/830	78/18577	0.971923	1	MsG0280011063.01	http://www.genome.jp/kegg-bin/show_pathway?map=map00280&multi_query=K00128+white,red%0d%0a	Amino acid metabolism	Metabolism
6	Oxidative phosphorylation	KEGG PATHWAY	map00190	6/830	255/18577	0.973701	1	MsG0480022486.01|MsG0280008226.01|MsG0480022509.01|MsG0880046405.01|MsG0580028442.01|MsG0580030056.01	http://www.genome.jp/kegg-bin/show_pathway?map=map00190&multi_query=K03885+white,blue%0d%0aK02259+white,red%0d%0aK01535+white,pink%0d%0a	Energy metabolism	Metabolism
2	Ribosome biogenesis in eukaryotes	KEGG PATHWAY	map03008	2/830	141/18577	0.988151	1	MsG0280006514.01|MsG0280006639.01	http://www.genome.jp/kegg-bin/show_pathway?map=map03008&multi_query=K14553+white,red%0d%0a	Translation	Genetic Information Processing
6	Nucleocytoplasmic transport	KEGG PATHWAY	map03013	6/830	288/18577	0.990026	1	MsG0080048705.01|MsG0180000384.01|MsG0180004377.01|MsG0380014094.01|MsG0180004381.01|MsG0380014090.01	http://www.genome.jp/kegg-bin/show_pathway?map=map03013&multi_query=K14297+white,red%0d%0aK14311+white,red%0d%0aK14291+white,blue%0d%0aK18655+white,red%0d%0a	Translation	Genetic Information Processing
2	Aminoacyl-tRNA biosynthesis	KEGG PATHWAY	map00970	2/830	151/18577	0.992061	1	MsG0180001798.01|MsG0780040972.01	http://www.genome.jp/kegg-bin/show_pathway?map=map00970&multi_query=K01893+white,red%0d%0aK01892+white,red%0d%0a	Translation	Genetic Information Processing
2	mRNA surveillance pathway	KEGG PATHWAY	map03015	2/830	178/18577	0.997353	1	MsG0380014090.01|MsG0380014094.01	http://www.genome.jp/kegg-bin/show_pathway?map=map03015&multi_query=K18655+white,red%0d%0a	Translation	Genetic Information Processing
2	RNA degradation	KEGG PATHWAY	map03018	2/830	178/18577	0.997353	1	MsG0280010889.01|MsG0180004951.01	http://www.genome.jp/kegg-bin/show_pathway?map=map03018&multi_query=K03679+white,blue%0d%0aK00850+white,blue%0d%0a	Folding, sorting and degradation	Genetic Information Processing
1	RNA polymerase	KEGG PATHWAY	map03020	1/830	130/18577	0.997428	1	MsG0180004453.01	http://www.genome.jp/kegg-bin/show_pathway?map=map03020&multi_query=K03026+white,blue%0d%0a	Transcription	Genetic Information Processing
1	Photosynthesis	KEGG PATHWAY	map00195	1/830	159/18577	0.999324	1	MsG0280010704.01	http://www.genome.jp/kegg-bin/show_pathway?map=map00195&multi_query=K08902+white,red%0d%0a	Energy metabolism	Metabolism
5	Ubiquitin mediated proteolysis	KEGG PATHWAY	map04120	5/830	361/18577	0.999734	1	MsG0780041687.01|MsG0880043588.01|MsG0480022347.01|MsG0380017515.01|MsG0180002394.01	http://www.genome.jp/kegg-bin/show_pathway?map=map04120&multi_query=K04506+white,blue%0d%0aK08770+white,blue%0d%0aK10144+white,red%0d%0a	Folding, sorting and degradation	Genetic Information Processing
10	Ribosome	KEGG PATHWAY	map03010	10/830	554/18577	0.999826	1	MsG0380018066.01|MsG0380015971.01|MsG0480020690.01|MsG0380015111.01|MsG0480021682.01|MsG0180005961.01|MsG0180005291.01|MsG0080048497.01|MsG0080049039.01|MsG0880044339.01	http://www.genome.jp/kegg-bin/show_pathway?map=map03010&multi_query=K02876+white,red%0d%0aK02926+white,red%0d%0aK02888+white,red%0d%0aK02939+white,red%0d%0aK02906+white,red%0d%0aK02879+white,red%0d%0aK02882+white,red%0d%0aK02867+white,red%0d%0aK02946+white,red%0d%0aK02871+white,red%0d%0a	Translation	Genetic Information Processing
7	Protein processing in endoplasmic reticulum	KEGG PATHWAY	map04141	7/830	495/18577	0.999965	1	MsG0680031848.01|MsG0880047581.01|MsG0780039847.01|MsG0280006307.01|MsG0480021403.01|MsG0280008719.01|MsG0480021405.01	http://www.genome.jp/kegg-bin/show_pathway?map=map04141&multi_query=K14018+white,red%0d%0aK08057+white,blue%0d%0aK10950+white,blue%0d%0aK03283+white,pink%0d%0a	Folding, sorting and degradation	Genetic Information Processing
