# Supplementary material for: Identification of Salt-Responsive Genes in Melatonin Regulated Alfalfa Salt Tolerance by Transcriptome Analysis
Source: Preprints.org preprint supplement (doi:10.20944/preprints202403.1815.v2), 2024-04-17
Supplement: Supplementary file 1 [file supplementary › Supplementary Files/Table S6.xlsx]

## Sheet: kegg_enrich_geneset_list_gene
Supplemental table S6. The KEGG enrich pathway was analyzed using R script (WLNMT_vs_WLN)
#Study_num	Term	Database	ID	Ratio_in_study	Ratio_in_pop	P-Value	Corrected P-Value	Genes	Hyperlink	typeII	typeI
2	Linoleic acid metabolism	KEGG PATHWAY	map00591	45348	48/18577	0.00204223	0.0469714	MsG0880042650.01|MsG0680030362.01	http://www.genome.jp/kegg-bin/show_pathway?map=map00591&multi_query=K15718+white,red%0d%0aK00454+white,red%0d%0a	Lipid metabolism	Metabolism
2	ABC transporters	KEGG PATHWAY	map02010	45348	168/18577	0.0229198	0.131789	MsG0480018562.01|MsG0480018434.01	http://www.genome.jp/kegg-bin/show_pathway?map=map02010&multi_query=K08711+white,red%0d%0a	Membrane transport	Environmental Information Processing
2	Photosynthesis	KEGG PATHWAY	map00195	45348	159/18577	0.0206809	0.158554	MsG0380014016.01|MsG0880045275.01	http://www.genome.jp/kegg-bin/show_pathway?map=map00195&multi_query=K02703+white,red%0d%0aK02690+white,red%0d%0a	Energy metabolism	Metabolism
1	Betalain biosynthesis	KEGG PATHWAY	map00965	45317	10/18577	0.0139113	0.15998	MsG0680034290.01	http://www.genome.jp/kegg-bin/show_pathway?map=map00965&multi_query=K15777+white,red%0d%0a	Biosynthesis of other secondary metabolites	Metabolism
1	Biosynthesis of various plant secondary metabolites	KEGG PATHWAY	map00999	45317	109/18577	0.141962	0.181396	MsG0880047232.01	http://www.genome.jp/kegg-bin/show_pathway?map=map00999&multi_query=K00789+white,red%0d%0a	Biosynthesis of other secondary metabolites	Metabolism
1	Ascorbate and aldarate metabolism	KEGG PATHWAY	map00053	45317	108/18577	0.140752	0.19043	MsG0880042930.01	http://www.genome.jp/kegg-bin/show_pathway?map=map00053&multi_query=K00103+white,red%0d%0a	Carbohydrate metabolism	Metabolism
1	Flavonoid biosynthesis	KEGG PATHWAY	map00941	45317	104/18577	0.135897	0.195353	MsG0380016128.01	http://www.genome.jp/kegg-bin/show_pathway?map=map00941&multi_query=K00660+white,red%0d%0a	Biosynthesis of other secondary metabolites	Metabolism
1	Galactose metabolism	KEGG PATHWAY	map00052	45317	101/18577	0.132239	0.202767	MsG0880041965.01	http://www.genome.jp/kegg-bin/show_pathway?map=map00052&multi_query=K01193+white,red%0d%0a	Carbohydrate metabolism	Metabolism
1	Fatty acid degradation	KEGG PATHWAY	map00071	45317	82/18577	0.108721	0.208381	MsG0580028023.01	http://www.genome.jp/kegg-bin/show_pathway?map=map00071&multi_query=K15401+white,red%0d%0a	Lipid metabolism	Metabolism
1	Ubiquinone and other terpenoid-quinone biosynthesis	KEGG PATHWAY	map00130	45317	76/18577	0.101167	0.211531	MsG0580024209.01	http://www.genome.jp/kegg-bin/show_pathway?map=map00130&multi_query=K05391+white,red%0d%0aK01904+white,red%0d%0a	Metabolism of cofactors and vitamins	Metabolism
1	alpha-Linolenic acid metabolism	KEGG PATHWAY	map00592	45317	100/18577	0.131016	0.215241	MsG0680030362.01	http://www.genome.jp/kegg-bin/show_pathway?map=map00592&multi_query=K00454+white,red%0d%0a	Lipid metabolism	Metabolism
1	Tropane, piperidine and pyridine alkaloid biosynthesis	KEGG PATHWAY	map00960	45317	71/18577	0.0948257	0.218099	MsG0380016128.01	http://www.genome.jp/kegg-bin/show_pathway?map=map00960&multi_query=K00660+white,red%0d%0a	Biosynthesis of other secondary metabolites	Metabolism
2	Plant-pathogen interaction	KEGG PATHWAY	map04626	45348	440/18577	0.125474	0.221993	MsG0780041212.01|MsG0580024209.01	http://www.genome.jp/kegg-bin/show_pathway?map=map04626&multi_query=K13412+white,red%0d%0aK05391+white,red%0d%0aK01904+white,red%0d%0a	Environmental adaptation	Organismal Systems
1	Folate biosynthesis	KEGG PATHWAY	map00790	45317	44/18577	0.0598315	0.229354	MsG0880042541.01	http://www.genome.jp/kegg-bin/show_pathway?map=map00790&multi_query=K01495+white,red%0d%0a	Metabolism of cofactors and vitamins	Metabolism
2	Phenylpropanoid biosynthesis	KEGG PATHWAY	map00940	45348	261/18577	0.0512295	0.235656	MsG0880047668.01|MsG0580024209.01	http://www.genome.jp/kegg-bin/show_pathway?map=map00940&multi_query=K00430+white,red%0d%0aK05391+white,red%0d%0aK01904+white,red%0d%0a	Biosynthesis of other secondary metabolites	Metabolism
1	Circadian rhythm - plant	KEGG PATHWAY	map04712	45317	70/18577	0.0935522	0.239078	MsG0380016128.01	http://www.genome.jp/kegg-bin/show_pathway?map=map04712&multi_query=K00660+white,red%0d%0a	Environmental adaptation	Organismal Systems
1	Glycerophospholipid metabolism	KEGG PATHWAY	map00564	45317	158/18577	0.199269	0.24122	MsG0480021808.01	http://www.genome.jp/kegg-bin/show_pathway?map=map00564&multi_query=K25193+white,red%0d%0a	Lipid metabolism	Metabolism
1	Isoflavonoid biosynthesis	KEGG PATHWAY	map00943	45317	63/18577	0.0845898	0.243196	MsG0480022311.01	http://www.genome.jp/kegg-bin/show_pathway?map=map00943&multi_query=K13257+white,red%0d%0a	Biosynthesis of other secondary metabolites	Metabolism
1	Cysteine and methionine metabolism	KEGG PATHWAY	map00270	45317	177/18577	0.220484	0.253556	MsG0880047232.01	http://www.genome.jp/kegg-bin/show_pathway?map=map00270&multi_query=K00789+white,red%0d%0a	Amino acid metabolism	Metabolism
1	Cutin, suberine and wax biosynthesis	KEGG PATHWAY	map00073	45317	61/18577	0.0820135	0.269473	MsG0580028023.01	http://www.genome.jp/kegg-bin/show_pathway?map=map00073&multi_query=K15401+white,red%0d%0a	Lipid metabolism	Metabolism
1	Starch and sucrose metabolism	KEGG PATHWAY	map00500	45317	289/18577	0.334978	0.334978	MsG0880041965.01	http://www.genome.jp/kegg-bin/show_pathway?map=map00500&multi_query=K01193+white,red%0d%0a	Carbohydrate metabolism	Metabolism
1	MAPK signaling pathway - plant	KEGG PATHWAY	map04016	45317	260/18577	0.306989	0.336226	MsG0680034664.01	http://www.genome.jp/kegg-bin/show_pathway?map=map04016&multi_query=K20604+white,red%0d%0a	Signal transduction	Environmental Information Processing
1	Nucleocytoplasmic transport	KEGG PATHWAY	map03013	45317	288/18577	0.334031	0.349214	MsG0880044274.01	http://www.genome.jp/kegg-bin/show_pathway?map=map03013&multi_query=K03231+white,red%0d%0a	Translation	Genetic Information Processing
