# Supplementary material for: Identification of Salt-Responsive Genes in Melatonin Regulated Alfalfa Salt Tolerance by Transcriptome Analysis
Source: Preprints.org preprint supplement (doi:10.20944/preprints202403.1815.v2), 2024-04-17
Supplement: Supplementary file 1 [file supplementary › Supplementary Files/Table S8.xlsx]

## Sheet: 1可视化表格
Supplemental table S8. Top 30 hub genes in the turquoise module
gene id	gene name	Connectivity	module
MsG0180000337.01	MsG0180000337.01	1001.5	turquoise
MsG0180000930.01	MsG0180000930.01	986.93	turquoise
MsG0180003510.01	MsG0180003510.01	989.736	turquoise
MsG0180003240.01	MsG0180003240.01	987.423	turquoise
MsG0180004762.01	MsG0180004762.01	981.424	turquoise
MsG0380011674.01	MsG0380011674.01	987.957	turquoise
MsG0380012445.01	MsG0380012445.01	1014.26	turquoise
MsG0380013300.01	MsG0380013300.01	984.221	turquoise
MsG0380013449.01	MsG0380013449.01	993.279	turquoise
MsG0380015484.01	MsG0380015484.01	989.365	turquoise
MsG0380016976.01	MsG0380016976.01	1019.53	turquoise
MsG0480019106.01	MsG0480019106.01	980.953	turquoise
MsG0480022274.01	MsG0480022274.01	1019.37	turquoise
MsG0480022661.01	MsG0480022661.01	979.919	turquoise
MsG0580024467.01	MsG0580024467.01	1008.49	turquoise
MsG0580025440.01	MsG0580025440.01	980.365	turquoise
MsG0680030558.01	MsG0680030558.01	1001.2	turquoise
MsG0780038118.01	MsG0780038118.01	1007.92	turquoise
MsG0780038117.01	MsG0780038117.01	987.371	turquoise
MsG0780039190.01	MsG0780039190.01	1001.24	turquoise
MsG0780040553.01	MsG0780040553.01	985.889	turquoise
MsG0780041447.01	MsG0780041447.01	1029.24	turquoise
MsG0780041299.01	MsG0780041299.01	989.86	turquoise
MsG0880042969.01	MsG0880042969.01	992.976	turquoise
MsG0880042714.01	MsG0880042714.01	1008.61	turquoise
MsG0880043828.01	MsG0880043828.01	981.511	turquoise
MsG0880044855.01	MsG0880044855.01	984.953	turquoise
MsG0880045861.01	MsG0880045861.01	989.481	turquoise
MsG0880046975.01	MsG0880046975.01	1012.59	turquoise
MsG0880047235.01	MsG0880047235.01	1009.06	turquoise
