# Supplementary material for: Identification of Salt-Responsive Genes in Melatonin Regulated Alfalfa Salt Tolerance by Transcriptome Analysis
Source: Preprints.org preprint supplement (doi:10.20944/preprints202403.1815.v2), 2024-04-17
Supplement: Supplementary file 1 [file supplementary › Supplementary Files/Table S10.xlsx]

## Sheet: Foglio1
Supplemental table S10. The raw data of qRT-PCR
gene	group	relative expression	average	STDEV
MsG0780040428.01	WLCK	0.914936	1.00264	0.0890481
		1
		1.09297
	WLN	1.77186	1.74609	0.0257075
		1.74596
		1.72045
	WLNMT	2.03594	1.82579	0.182307
		1.70999
		1.73144
MsG0780036812.01	WLCK	1.00104	1.00001	0.00619389
		1.00563
		0.993371
	WLN	0.18499	0.19454	0.00963058
		0.194381
		0.204249
	WLNMT	0.0142727	0.012596	0.00164215
		0.0125246
		0.0109907
MsG0180004772.01	WLCK	1.08871	1.00183	0.0752387
		0.957596
		0.959195
	WLN	0.0154818	0.0168352	0.00117894
		0.0173846
		0.0176392
	WLNMT	0.0272053	0.0296006	0.00207531
		0.0308593
		0.0307373
MsG0180004541.01	WLCK	0.998814	1.00029	0.0296697
		1.03067
		0.971391
	WLN	0.354935	0.3535	0.00143461
		0.353498
		0.352066
	WLNMT	0.543847	0.504796	0.0385687
		0.503814
		0.466728
MsG0880047697.01	WLCK	0.962164	1.00043	0.0359527
		1.00563
		1.0335
	WLN	0.438301	0.440507	0.00628991
		0.435617
		0.447602
	WLNMT	0.200362	0.194157	0.00549873
		0.189888
		0.192221
MsG0480020076.01	WLCK	1.00764	1.00002	0.0076149
		1
		0.992414
	WLN	4.83933	4.90669	0.0647722
		4.96852
		4.91224
	WLNMT	24.9994	26.212	1.22222
		26.193
		27.4436
MsG0180005358.01	WLCK	1.07328	1.00167	0.0707932
		1
		0.931723
	WLN	0.015972	0.0160544	8.23891e-05
		0.0160542
		0.0161368
	WLNMT	0.00790731	0.00769949	0.000249485
		0.0074228
		0.00776835
MsG0480018569.01	WLCK	1.04779	1.00073	0.0467035
		1
		0.954391
	WLN	0.0206556	0.0213467	0.000694847
		0.0213391
		0.0220452
	WLNMT	0.032857	0.0326411	0.000215695
		0.0326406
		0.0324256
